# Supplementary material for: Assessment of the Molecular Responses of an Ancient Angiosperm against Atypical Insect Oviposition: The Case of Hass Avocados and the Tephritid Fly Anastrepha ludens
Source: MDPI journal article supplement (doi:10.3390/ijms24032060), 2023-01-20
Supplement: s1 [file s1]

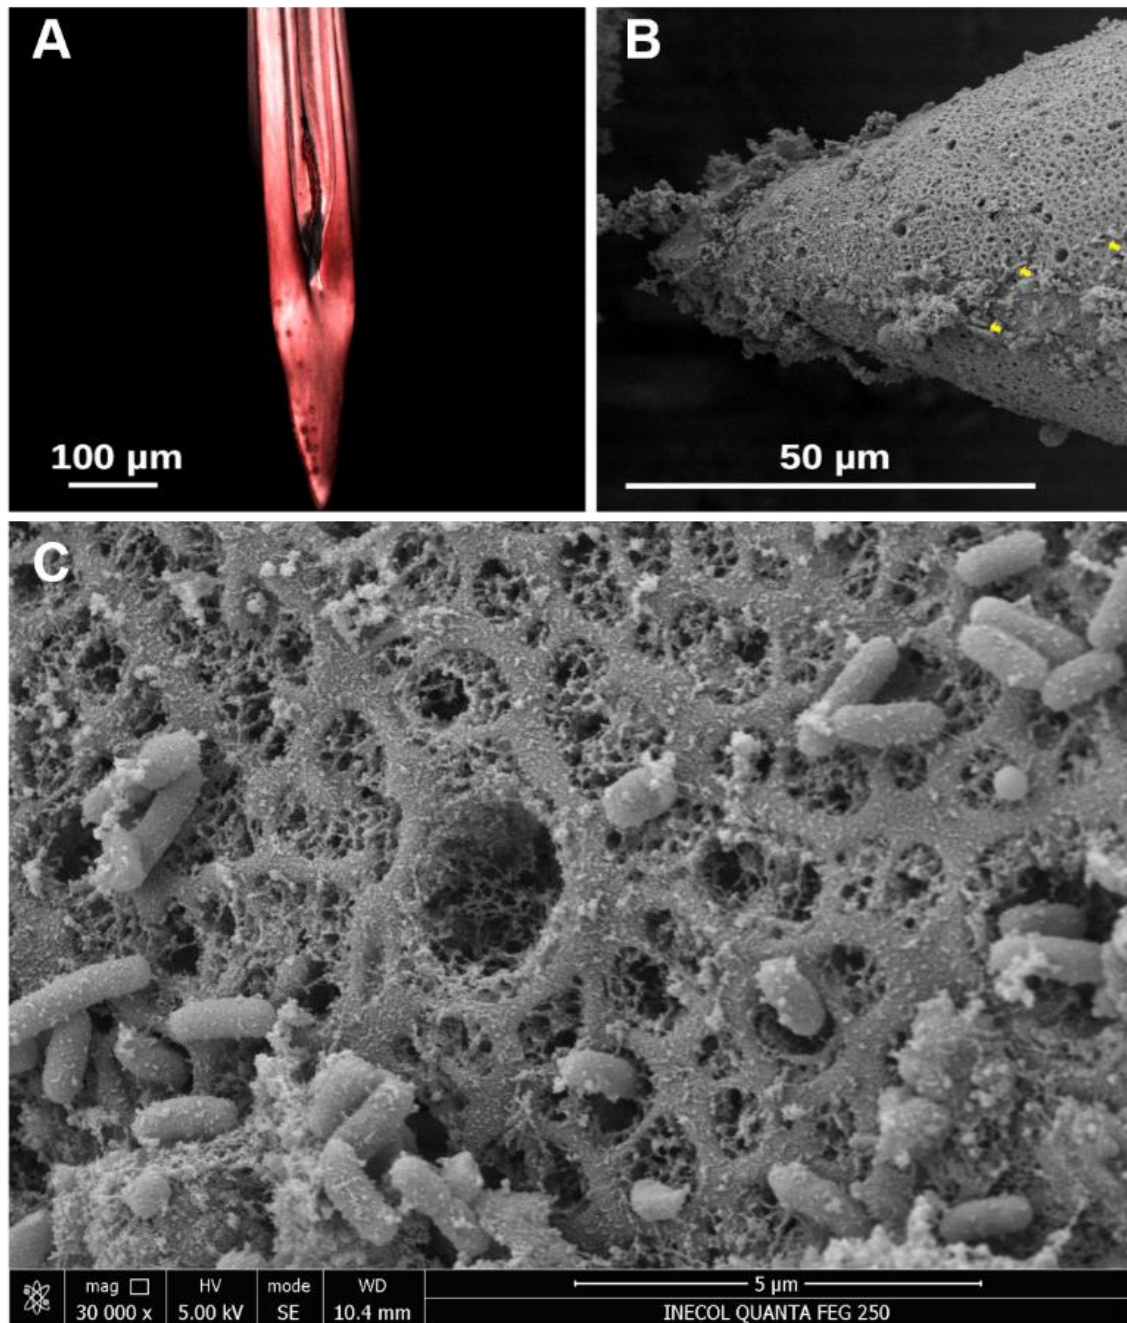

**Supplementary Figure S1.** (A) Confocal microscopy image showing an aculeus of an *Anastrepha ludens* female. (B) SEM images of the surface of an *A. ludens* egg depicting bacteria-like structures (yellow arrows). (C) Magnification of multiple bacteria-like structures on the egg surface.
