# Supplementary material for: Assessment of the Molecular Responses of an Ancient Angiosperm against Atypical Insect Oviposition: The Case of Hass Avocados and the Tephritid Fly Anastrepha ludens
Source: Int J Mol Sci. 2023 Jan 20;24(3):2060. doi: 10.3390/ijms24032060 (PMC9916504; doi:10.3390/ijms24032060)
Supplement: Supplementary file 1 [file ijms-24-02060-s001.zip › Supplementary Tables (S1-S9).xlsx]

## Sheet: TableS1
	Table S1: Summary of Illumina sequencing dataset generated in this study from avocado fruit (Persea americana cv. Hass).
		Growing condition			Library ID	Replicates	Paired-End reads (2x150 bp)	HQ* paired-end reads	Pairs merged	Trimmed-unmerged paired-end reads	Pairs discarded
	Sequenced samples related to each of the days after A. ludens oviposition on avocado fruits. Samples which emulate the damage caused during the oviposition were generated using a pin.	1	Control, fruit without any obvious damage		EI1TA2SS13	R1	24875122	18151848	51133090	430700056	585931
		2			EI1TA2SS22	R2	23119255	17001621
		3			EI1TA2SS31	R3	35209262	26157254
		4	Experiment 01	Day 1; Damaged fruit with a pin	EI1TA2SS18	R1	21610206	15566861
		5			EI1TA2SS27	R2	24007275	18343465
		6			EI1TA2SS36	R3	24000253	17948321
		7		Day 3; Damaged fruit with a pin	EI1TA2SS19	R1	28356601	21521500
		8			EI1TA2SS28	R2	26782536	17796692
		9			EI1TA2SS37	R3	22788621	14220749
		10		Day 6; Damaged fruit with a pin	EI1TA2SS20	R1	23106637	17478484
		11			EI1TA2SS29	R2	24684374	18020980
		12			EI1TA2SS38	R3	24689555	16776458
		13		Day 9; Damaged fruit with a pin	EI1TA2SS21	R1	26189965	17680473
		14			EI1TA2SS30	R2	18070090	13082324
		15			EI1TA2SS39	R3	18952739	11938592
		16	Experiment 02	Day 1; Fruit with oviposited eggs	EI1TA2SS14	R1	21735769	15455892
		17			EI1TA2SS23	R2	23700480	16827971
		18			EI1TA2SS32	R3	24788238	18404942
		19		Day 3; Fruit with oviposited eggs	EI1TA2SS15	R1	26248477	19047521
		20			EI1TA2SS24	R2	24340724	18051878
		21			EI1TA2SS33	R3	24061770	17537233
		22		Day 6; Fruit with oviposited eggs	EI1TA2SS16	R1	32812631	24552934
		23			EI1TA2SS25	R2	24093495	17600714
		24			EI1TA2SS34	R3	27440891	19917168
		25		Day 9; Fruit with oviposited eggs	EI1TA2SS17	R1	23822455	17298430
		26			EI1TA2SS26	R2	25509737	18860877
		27			EI1TA2SS35	R3	23226317	17177895
						Total	668223475	482419077
						Average (per sample)	7.42471e+07	5.36021e+07
	*High Quality (HQ) reads selected based on the stringency parameters: -q 20 (Minimum quality score to keep), -p 90 (Minimum percent of bases that must have [-q] quality) and -a 30 (the average quality of paired-end reads).

## Sheet: TableS2
	Table S2: De novo assembled transcriptome of avocado fruit (Persea americana cv. Hass). This data set comprises from left to right: i) the ORFs corrected and identified by a homology-based method. The erroneous frame-shifts and chimeric Unigenes were eliminated (the AlingWise pipeline was used for this purpose; see Methods for more details) and, ii) the corresponding proteins for each coding sequ…
		Representatives nr-unigenes	Length (nt)	Identified and corrected coding region (CDS)	Length (a.a.)	Translated ORFs
	1	UN000001	1791	ATGTGTGGGATTGTAGGTTATATAGGGGATAGCGAGAAAAAATCCATCCTTTTAGAGGGTTTAAAGGAATTGGAATACAGAGGTTATGACAGTGCGGGTTTAGCCGTATTGAGTGCTAATCGTTTGGAAGTGTTTAAAACTCAAGGGAAATTAGAAAACCTTAAACTAGAGCTTAAAAATAAAGAGTTCTTAAATTTTGGCGTGAGTATCGCTCATACGAGATGGGCCACGCATGGCAAGCCAAGCAGCGCGAACGCCCACCCGCATTTTACAGAAAATTTAGCCTTAGTGCATAATGGCATTATTGAAAATTACGCAAGCTTGAAAAAAGAATTAGAAAATAAAGGGCATGCGTTTTTAAGCCAAACGGACACGGAAGTGATTGCGCATTTATTAGAA…	597	MCGIVGYIGDSEKKSILLEGLKELEYRGYDSAGLAVLSANRLEVFKTQGKLENLKLELKNKEFLNFGVSIAHTRWATHGKPSSANAHPHFTENLALVHNGIIENYASLKKELENKGHAFLSQTDTEVIAHLLEETLKSESDLLKAFEKSISLLKGSYAILMLHKRAKESLFYAKSSSPLVVGKGKEGVFFASSLSVLAPKVDQFVILEENSVGQISLENFKDLKHIENMKDYAFENKDYSKGNFRNYLEKEIYEQHSSLLECLEGRLEALSVYCEIDPEFLENVNEITLCSCGSSYHASLASVYLFERLAKIRARAILASEYRYAHFKSNPNELFIAISQSGETADTLEALKLAKAQGLKTISLCNAPFSMMSRISDHTLLIRAGVERSVASTKAFSSQ…
	2	UN000002	2409	TTTGTGAGTATAGAAAAAAAATGGCAAGAATTTTGGTGGAAAAATAAGAGTTTTGAGCCTAAAGACGATTTTAACCTCCCTAAAAAATACATTCTGAGCATGCTGCCTTATCCTAGTGGGGAAATCCATATGGGGCATGTGCGCAATTACACCATTGGCGATGCTTTGGCACGTTATTATCGTTTGCACCATTACAATGTGTTACACCCTATGGGGTTTGATTCTTTTGGGATGCCTGCGGAAAATGCGGCCATTAAGCATGGTATCCACCCTAAAACCTGGACTTATGAAAACATTGAAGCCATGCAAAAAGAGTTTGAAGCTTTAGGGTTTTCTTTTTCTAAAAACAGGGAATTTGCCACTTCAGATCCGGATTACACGAAATTTGAACAGCAATTT…	803	FVSIEKKWQEFWWKNKSFEPKDDFNLPKKYILSMLPYPSGEIHMGHVRNYTIGDALARYYRLHHYNVLHPMGFDSFGMPAENAAIKHGIHPKTWTYENIEAMQKEFEALGFSFSKNREFATSDPDYTKFEQQFFIDLWEKGLIYRKKAMLNWCPNDKTVLANEQVIDGRCWRCDTEVIQKELYQYYLKITNYAEELLKDLETLENHWPSQVLIMQKNWIGKSSGLQFGFKIADECLKACNGIQEIEVFTTRADTIYGVTYIAIAPEHPLVEHAIKRASQEDSKMIKAILNTTQRERALEKKGVFLGVYAIHPLTKQKIPVWVANFALANYGSGALMGVPACDERDFEFANLYHIPIKVITQSSQSLPHTKEEVLKNSGEWSDLSSSVAREKIIAYFEKE…
	3	UN000005	1881	GATATTTTAGTGGTTGGTGGGGGGCATGCAGGCATTGAAGCGAGCTTGATTGCAGCCAAAATGGGGGCTAGGGTGCATTTAATCACCATGCTCATAGACACGATCGGTTTAGCGAGCTGTAATCCGGCCATTGGGGGCTTGGGTAAAGGGCATTTGACTAAAGAAGTGGATGTTTTAGGGGGGGCTATGGGGATTATTACGGATCATAGCGGTTTGCAATATCGTGTGTTAAACGCTTCTAAAGGGCCGGCGGTTAGGGGGACTAGAGCGCAAATTGATATGGACACTTACCGCATTTTTGCAAGAAACCTTGTTTTAAACACCCCTAATTTGAGCGTCTCTCAAGAAATGACCGAAAATTTAATCCTTGAAAACGATGAAGTAGTGGGCGTAACCACG…	627	DILVVGGGHAGIEASLIAAKMGARVHLITMLIDTIGLASCNPAIGGLGKGHLTKEVDVLGGAMGIITDHSGLQYRVLNASKGPAVRGTRAQIDMDTYRIFARNLVLNTPNLSVSQEMTENLILENDEVVGVTTNINNTYKAKKVIITTGTFLKGVVHIGEHQNQNGRFGENASNSLALNLRELGFKVERLKTGTCPRVAGNSIDFEGLEEHFGDTNPPYFSYKTKDFNPTQLSCFITYTNPITHQIIRDNFHRAPLFSGQIEGIGPRYCPSIEDKINRFSEKERHQLFLEPQTIHKSEYYINGLSTSLPLDVQEKVIHSIKGLENALITRYGYAIEYDFIQPTELTHTLETKKIKGLYLAGQINGTTGYEEAAAQGLMAGINAALALKNQTPFILKRNE…
	4	UN000006	2532	ACTGACCAATTGCATGAGACTTTAGACAGCGCGCTCGCTTTAGCCTTGCACCATAAAAACGCTGAAGTAACGCCCTTACATGCGCTTTTTGCCATGCTTAATAACTCCCAAGGCATTCTCATTCAGGCCTTACAAAAAATGCCTGTGGATATTGAAGCTTTAAAACTTAGCGTTCAAAGCGAGTTGAATAAGTTCGCTAAAGTCTCACAAATCAGCAAGCAAAATATCCAATTAAGCCAAGCTTTAATCCAAAGTTTAGAAAACGCTCAAGGCTTGATGGCTAAAAGGGGCGATTCTTTCATCGCTACCGATGTGTATCTTTTGGCGAATATGAGCCTTTTTGAAAGCGTTTTAAAGCCTTATTTAGACACTAAGGAATTGCAAAAAACTTTAGAATCT…	844	TDQLHETLDSALALALHHKNAEVTPLHALFAMLNNSQGILIQALQKMPVDIEALKLSVQSELNKFAKVSQISKQNIQLSQALIQSLENAQGLMAKRGDSFIATDVYLLANMSLFESVLKPYLDTKELQKTLESLRKGRTIQDKNDDSNLESLEKFGIDLTQKALENKLDPVIGRDEEIIRMMQILIRKTKNNPILLGEPGVGKTAVVEGLAQRIVNKEVPKTLLNKRVIALDLSLLVAGAKYRGEFEERLKKVIEEVKKSANVILFIDEIHTIVGAGASEGGMDAANILKPALARGELHTIGATTLKEYRKYFEKDMALQRRFQPILLNEPSINEALQILRGLKETLETHHNITINDSALVASAKLSSRYITDRFLPDKAIDLIDEGAAQLKMQMESEP…
	5	UN000007	1524	ATGATTTTAGTATTAGATTTTGGGAGCCAATACACACAGCTGATTGCTAGAAGATTGAGAGAGAGCGGGATTTATACAGAAATAGTCCCTTTTTTTGAAAGCATAGAAAACATTCAAAAAAAAGCCCCTAAAGGTTTGATTTTGAGTGGGGGGCCAGCGAGCGTGTATGCTAAAGACGCTTACAAGCCTAACGAGAAAATCTTTGATTTGAATTTGCCGATTTTAGGGATTTGCTACGGCATGCAGTATTTGGTGGATTTTTTTGGGGGGGTAGTGGCTTGTGCGAACGAACAAGAATTTGGTAAGGCTGTTTTAGAAATCGCTCAAAATTCTGTGATTTTTGAAGGCGTGAAGATTAAAAGCCTTGTGTGGATGAGCCACATGGATAAAGTCATAGAA…	508	MILVLDFGSQYTQLIARRLRESGIYTEIVPFFESIENIQKKAPKGLILSGGPASVYAKDAYKPNEKIFDLNLPILGICYGMQYLVDFFGGVVACANEQEFGKAVLEIAQNSVIFEGVKIKSLVWMSHMDKVIELPKGFTTLAKSPNSPHCAIENGKIFGLQFHPEVIQSEEGGKILENFALLVCGCEKTWGMQHFAQREIARLKEKIANAKVLCAVSGGVDSTVVATLLYRAIKDNLIAVFVDHGLLRKNEKERVQAMFKDLQIPLNTIDAKEVFLSKLKGVSEPELKRKIIGETFIEVFEKEAKKHHLKGKIEFLAQGTLYPDVIESVSVKGPSKVIKTHHNVGGLPEWMDFKLIEPLRELFKDETRLLGKELGVSQDFLMRHPFPGPGLAVRILGEV…
	6	UN000009	1650	ACTCCCCTAAAAAAATACGCTAAAAACTTGAGCGCTTTAGCCCAAGATAACGCTTTAGATCCAGTCATTGGCAGAGAAGAAGAGATTTTAAGAGTGATAGAAATTTTAGGGCGCAGAAAAAAGAATAACCCGCTTTTAATTGGCGAAGCGGGCGTAGGGAAAACCTCCATCGCTGAAGCTTTGGCTTTAAAAATCGCTCAAAAAGAAGTGCCGGAGTTTTTGCAAGAATATGAGGTTTATTCTTTGGATTTAGCTTTAATGGTGGCTGGGGCAAAATACAGAGGGGATTTTGAAAAGCGCTTGAAAAAAACGCTCAAAGAGATCCAACAAAACGGCCGTATCATTTTATTCATTGATGAAATCCACACCCTTTTAGGTGCAGGGAGCAGTAACGCTGGG…	550	TPLKKYAKNLSALAQDNALDPVIGREEEILRVIEILGRRKKNNPLLIGEAGVGKTSIAEALALKIAQKEVPEFLQEYEVYSLDLALMVAGAKYRGDFEKRLKKTLKEIQQNGRIILFIDEIHTLLGAGSSNAGSLDAANILKPVLTDGGLKCLGATTFEEYRSVFEKDKAFNRRFSVIKVEEPSKEACYLILKKIAPLYEEHHQVRYDESVFKACVDLTSDYMHDKFLPDKAIELLDEVGSRKKISPKKGKKIGVDDVKETLALKLKIPKMRLSSDKKALLRNLEKSLKNKIFAQAEAINLVSNAIKIQHCGLSSKNKPVGSFLFVGPSGVGKTELAKELALNLNLHFERFDMSEYKEAHSVAKLIGSPSGYVGFEQGGLLVNAIKKHPHCLLLLDEIE…
	7	UN000010	1284	AAACTCATGGAGTTGTTGCACAGCATTAATGATTTTAATGAAGCCAAGCAAGTGATTGCTGGGGGGGTCAATTCGCCTGTGAGGGCGTTTAAGAGCGTTAAAGGCACTCCACCCTTTATTTTAAAAGGTAAAGGGGCGTATCTTTATGATGTGGATAACAATCATTATATAGATTTTGTGCAAAGTTGGGGGCCTTTGATTTTTGGGCATGCGAACGAAGAGATTGAAGAAAATATTATTAATGTATTAAAAAAAGGCACTTCTTTTGGCGCTCCCACAGAGTTAGAAACCACTTTAGCTAAGGAAATCATTTCTTGTTATGAAGGTTTAGATAAGGTGCGTTTGGTGAATAGCGGCACGGAAGCGACCATGAGCGCGATACGACTCGCTAGAGCTTAT…	428	KLMELLHSINDFNEAKQVIAGGVNSPVRAFKSVKGTPPFILKGKGAYLYDVDNNHYIDFVQSWGPLIFGHANEEIEENIINVLKKGTSFGAPTELETTLAKEIISCYEGLDKVRLVNSGTEATMSAIRLARAYSQKDDLIKFEGCYHGHSDSLLVKAGSGCATFGSPSSLGVPNDFSKHTLVARYNDLNSTEECFKKGDVGCVIIEPIAGNMGLVPAQKEFLLGLKALCEKYQAVLILDEVMSGFRASLSGSQEFYGVVPDLVTFGKVIGAGLPLACFGGRAEIMDLLSPIGGVYQAGTLSGNPLAVCAGLSALYKIKRDKTLYTRLNALAVRLTQGLQKSAQSYNIALETLNRGSMFGFFFNENAVHDFDDALKSDTEMFAKFHQKMLFKGVYLACSS…
	8	UN000014	2529	ATTCGCAACGAATTTTTACAATTTTTTAAAAATAAAGGGCATGAGATTTATCCCAGCATGCCTTTAGTGCCTAATGACGCCACCTTGCTTTTTACCAATGCCGGCATGGTGCAGTTTAAAGATATTTTTACCGGTATAGTGCCGCGCCCTAGCATCCCCAGAGCGACAAGCTCGCAATTGTGCATGCGCGCAGGAGGCAAGCATAACGATTTAGAAAATGTCGGTTATACCGCAAGGCACCACACGCTCTTTGAAATGTTAGGGAATTTCTCTTTTGGGGATTATTTCAAAGAAGAAGCGATCTTGTTTGCGTGGGAATTTGTAACCAAAAATTTAGGGTTTAAGCCTAAAGATTTATACATCAGCGTGCATGAAAAAGACGATGAAGCCGTTAAATTA…	843	IRNEFLQFFKNKGHEIYPSMPLVPNDATLLFTNAGMVQFKDIFTGIVPRPSIPRATSSQLCMRAGGKHNDLENVGYTARHHTLFEMLGNFSFGDYFKEEAILFAWEFVTKNLGFKPKDLYISVHEKDDEAVKLWEKFVHVDRIKKMGDKDNFWQMGDSGPCGPCSEIYIDQGEKHFKGSEDYFGGEGDRFLEIWNLVFMQYERSSNGVLSPLPKPSIDTGMGLERVQALLEHKLNNFDSSLFAPLMAEISELTSLDYASEFQPSFRVVADHARAVAFLLAQGVHFNKEGRGYVLRRILRRALRHGYLMGLKEAFLYKVVGVVCEQFANTHAYLKESKEMVVKECFEEEERFLETLESGMELFNLSLKHLNENKIFDGKIAFKLYDTFGFPLDLTNDMLR…
	9	UN000018	1356	AGGATTATAGAAATGTCAAACACAACCTGGTCGCCAACTTCATGGCATTCTTTTAAGATAGAGCAACACCCCACTTACAAAGATAAGCAAGAATTAGAAAGGGTCAAAAAAGAATTGCACTCCTACCCTCCCTTAGTGTTTGCTGGCGAAGCGAGGAATTTGCAAGAGCGTTTAGCCCAAGTCATTGACAATAAGGCGTTTTTGTTGCAAGGGGGCGATTGCGCGGAGTCGTTTTCTCAATTTAGCGCTAACCGAATTAGAGACATGTTTAAAGTGATGATGCAAATGGCGATTGTCTTAACTTTTGCCGGCTCTATACCGATTGTGAAAGTGGGGCGCATTGCCGGGCAATTTGCCAAGCCTCGCTCCAATGCGACTGAAATGCTGGATGATGAAGAA…	452	RIIEMSNTTWSPTSWHSFKIEQHPTYKDKQELERVKKELHSYPPLVFAGEARNLQERLAQVIDNKAFLLQGGDCAESFSQFSANRIRDMFKVMMQMAIVLTFAGSIPIVKVGRIAGQFAKPRSNATEMLDDEEVLSYRGDIINGISKKEREPKPERMLKAYHQSVATLNLIRAFAQGGLADLEQVHRFNLDFVKNNDFAQKYQQIADRITQALGFMRACGVEIEKTPILREVEFYTSHEALLLHYEEPLVRKDSLTNQFYDCSAHMLWIGERTRDPKGAHVEFLRGVCNPIGVKIGPNASVSEVLELCDVLNPHNIKGRLNLIVRMGSKMIKECLPKLLQGVLEEKRHILWSIDPMHGNTVKTSLGVKTRAFDSVLDEVKSFFEIHRAEGSLASGIHLE…
	10	UN000024	1794	ACGCCAATGAAAAATATCCGCAATTTTTCCATTATCGCTCACATTGACCATGGTAAAAGCACTTTAGCGGATTGTTTGATTTCTGAATGCAACGCTATCAGCAACAGAGAAATGACGAGCCAAGTGATGGACACTATGGATATTGAAAAAGAAAGGGGCATTACGATTAAGGCTCAAAGCGTGCGCTTAAATTACACTTTTAAGGGGGAGGATTATGTGTTAAACCTCATTGACACCCCAGGGCATGTGGATTTTAGTTATGAAGTGTCGCGCTCTTTGTGTTCGTGCGAAGGGGCGTTATTAGTGGTAGATGCCACTCAAGGCGTGGAAGCGCAAACCATCGCCAACACTTATATCGCTTTAGATAACAATTTAGAGATTTTACCGGTAATCAATAAA…	598	TPMKNIRNFSIIAHIDHGKSTLADCLISECNAISNREMTSQVMDTMDIEKERGITIKAQSVRLNYTFKGEDYVLNLIDTPGHVDFSYEVSRSLCSCEGALLVVDATQGVEAQTIANTYIALDNNLEILPVINKIDLPNANVLEVKQDIEDTIGIDCFNANEVSAKAKLGIKDLLEKIITTIPAPSGDFNAPLKALIYDSWFDNYLGALALVRIMDGSINTEQEILVMGTGKKHGVLGLYYPNPLKKIPTKSLECGEIGIVSLGLKSVTDIAVGDTLTDAKNPTSKPIEGFMPAKPFVFAGLYPIETDRFEDLREALLKLQLNDCALNFEPESSVVLGFGFRVGFLGLLHMEVIKERLEREFGLNLIATAPTVVYEVHLTDNSIKYVQNPSELPPENHIA…
	11	UN000025	1089	TTAAACCCAAAAAGCCTAGAAGATTTTATAGGCCAAGAGCATTTAATAGGGAAAGACGCCCCCTTATTTAAAGCCTTACAATCCAAACACTTCCCCCATGCCTTTTTCTATGGCCCTCCTGGCGTGGGTAAAACAAGCCTGGCTCAAATCATCGCCTGCATGCTAGAGCGTCCCATTCTTTCATTTAATGCGACGGATTTCAAATTAGAATATTTGCGCCTTAAGCTTAAAAATTACCAAAACACCCTTTTAAAACCCGTTGTTTTTATTGATGAAACCCACAGATTGAATAAAACCCAACAAGAATTTTTACTCCCCATTATGGAAAAAAATCACGCTTTAATCTTAGGGGCTAGCACGCAAGATCCTAATTACAGCCTAAGCCATGCGATCCGCTCA…	363	LNPKSLEDFIGQEHLIGKDAPLFKALQSKHFPHAFFYGPPGVGKTSLAQIIACMLERPILSFNATDFKLEYLRLKLKNYQNTLLKPVVFIDETHRLNKTQQEFLLPIMEKNHALILGASTQDPNYSLSHAIRSRSFIFELTPLNKNDLDKLCDKALTLLKKQIEPSAKTYLLNNSAGDARALLNLLDLSAKIEDPITLKTLQSLRPHSLNDGSYSDDTHYNLTSALIKSLRGSDENASIYYLARLIAGGENPEFIARRLVIFASEDIGNANPNALNLASSCLFSVKQIGYPEARIILSQCVIYLACSPKSNTAYRAINQALDCVQKGSLYPIPKHLLPNAKDYLYPHDYNGYVKQDYLEKPLN
	12	UN000026	1098	ATGGGCTTGTCTGTAGGCATTGTGGGTTTGCCTAATGTGGGCAAATCCAGCACCTTTAACGCGCTCACTAAAACCCAAAACGCCCAAAGCGCGAACTACCCTTTTTGCACCATTGAACCCAATAAAGCCATCGTGAATGTGCCTGATAGGCGGCTTGATGCGTTGGCTCAAATCGTAAAGCCTGAACGCATTTTGCATTCTGTGGTGGAATTTGTGGATATTGCCGGATTGATTAAGGGAGCGAGCAAGGGGGAGGGCTTGGGCAATCAGTTTTTAGCCAATATCAAGGAATGTGAAGTGATCTTGCAAGTGGTGCGCTGTTTTGAAGATGATAATATCACGCATGTGAACGATAAAATTGATCCTTTGAATGATATAGAGACCATTGAATTGGAGTTG…	366	MGLSVGIVGLPNVGKSSTFNALTKTQNAQSANYPFCTIEPNKAIVNVPDRRLDALAQIVKPERILHSVVEFVDIAGLIKGASKGEGLGNQFLANIKECEVILQVVRCFEDDNITHVNDKIDPLNDIETIELELILADIATLDKRIDRLQKSLKSSKDAKNLLECALSLKTHLEELKPAKTFPLNTSEAFLELDKELSFLSHKKMIYVANVGEEDLNALNEHAKKVQNYAKEQNSEFVALCAKLEEEMVSMSGDEVKEFLQSLGVEESGLEKTIRLSFKELGLINYFTAGVKEVRSWTIKKGSSAPVAAGVIHKDFEKGFIRAETISYDDFIAYKGEAGAKEKGALRIEGKDYIVQDGDVLHFRFNV
	13	UN000028	1410	TTTAAAATCAAATTTCAAAGGATTAGCATGCAATTTAGAATCGAACATGACACGATGGGCGAAATCAAAGTAGATGATAGCCAATACTGGGGGGCTCAAACGCAACGCAGTCTTGAAAACTTTAAGATCGGCACTGAAAAAATGCCTAAAGAACTCATTGGTGCGTTTGCCAAACTTAAAAGGAGTTTGGCGGTAGTCAACCACAAGTTAGGGAAATTAAGCTTGGAAAAATCGCAAGCCATTATCAAGGCGTGCGATTGCATTTTAAAAGGCGAGTTGTGCGGCGAATTCCCGTTGGCGATATGGCAAACAGGGAGCGGGACTCAAACGAACATGAACCTCAATGAAGTCATTGCCAATAAGGCTACCGAAATTTTAGGGGGTAATTTTAGAGAGAAA…	470	FKIKFQRISMQFRIEHDTMGEIKVDDSQYWGAQTQRSLENFKIGTEKMPKELIGAFAKLKRSLAVVNHKLGKLSLEKSQAIIKACDCILKGELCGEFPLAIWQTGSGTQTNMNLNEVIANKATEILGGNFREKKLIHPNDDVNMSQSSNDTFPTAMHIVSVLEITHKLLPSLENLLKTFKEKSQQFKEIVKIGRTHLQDATPLTLGQEFSGYASMLEHSKQQILESLEHLRELAIGGTAVGTGLNAHKELSEKVAEELSQFSGVKFVSAPNKFHALTSHDAIAYAHGAFKALAANLMKIANDIRWLASGPRCGLGELNIPENEPGSSIMPGKVNPTQCEAMTMVAVQVMGNDTAIGIAASQGNFELNVFKPVIIYNFLQSLRLLSDSMESFNIHCASGI…
	14	UN000034	1413	TTTGAAGCTGTAATCGGGCTAGAAGTCCATGTCCAACTCAACACCAAAACCAAAATCTTTTGCTCTTGCTCTACAAGCTTTGGAGAAACCCCCAATTCTAACACCTGCCCTGTGTGTTTGGGCTTACCGGGAGCTTTGCCGGTGTTGAATAAAGAAGTGGTTAAAAAAGCCATCCAATTAGGCACAGCCATTGAAGCCAATATCAACCAGTATTCCATTTTTGCGAGGAAAAATTACTTTTACCCTGATTTGCCTAAGGCTTATCAAATTTCGCAGTTTGAAGTCCCCATTGTGAGCGATGGGAAGTTAGAGATTGACACCAAAGAGGGCGTAAAAATCGTGCGTATTGAAAGAGCCCACATGGAAGAAGACGCCGGTAAAAATATCCATGAGGGCAGC…	471	FEAVIGLEVHVQLNTKTKIFCSCSTSFGETPNSNTCPVCLGLPGALPVLNKEVVKKAIQLGTAIEANINQYSIFARKNYFYPDLPKAYQISQFEVPIVSDGKLEIDTKEGVKIVRIERAHMEEDAGKNIHEGSYSLVDLNRACTPLLEIVSKPDMRNSEEAIAYLKKLHAIVRFIGISDSNMQEGNFRCDANVSIRPKGDEKLYTRVEIKNLNSFRFIAKAIEYEIERQSVAWENGRYSEEVVQETRLFDTNKGITLSMRNKEESADYRYFKDPDLYPVFIDEKLLKESQKINELPSTKKTRYMRDFNLKEDDANLLVSDPLLAEYFESMLHLGVKAKTSVTWLCVELLGRLKAEVTLENCGVSAHMLGALAKRIDEGKISGKSAKDVLDKLLEEHGSD…
	15	UN000036	2574	GAAAAAAAGATTTATGAAATTTGCTCTCATAGGGGGTATTTTGAAATCAATGGCAATGAAAAAATCCAAGAAAAAGGCAAGCGATTTTGCTTGATGATGCCCCCTCCTAATGTGACCGGCATCTTACACATAGGGCATGCTTTAACTTTAAGCTTGCAAGATATTTTAGCGCGTTATAAACGCATGGACGGGTATAAGACCTTGTATCAGCCCGGATTGGATCACGCTGGCATTGCGACGCAAAATGTTGTAGAAAAGCAACTTTTAAATCAAGGGATTAAAAAAGAAGATTTGGGGCGTGAAGAGTTTATTAAAAAAGTGTGGGAGTGGAAAGAAAAGAGCGGGGGAGCGATTTTAGAGCAAATGAAGCATTTAGGCGTGAGCGCGGCTTTTTCTAGG…	858	EKKIYEICSHRGYFEINGNEKIQEKGKRFCLMMPPPNVTGILHIGHALTLSLQDILARYKRMDGYKTLYQPGLDHAGIATQNVVEKQLLNQGIKKEDLGREEFIKKVWEWKEKSGGAILEQMKHLGVSAAFSRTRFTMDKGLQRAVKLAFLKWYEKGLIVQDNYMVNWCTKDGALSDIEVEYEERKGALYYIRYYLENQKDYLVVATTRPETLFGDSAIMVNPNDERYRHLVGQKAILPLINRTIPIIADEHVEMEFGTGCVKVTPGHDFNDYEVGKRHYLETIKIFDEKGILNARCGEFENLERLEARDKVVAKLKENALLEKIEEHAHQVGHCYRCHNVLEPYVSKQWFVKPEIAQSSIEKIQQGLARFYPSNWINNYNAWMRELRPWCISRQLFWG…
	16	UN000038	1206	GGGGTGCCTATCCTTATTAAAGACAATATCAGCGTTAAGGGGTGGGAAATCACTTGCTCCAGTAAGATTTTAGAAGGCTATGTTGCCCCTTATCATGCGAGCGCGATTGAAAACTTGCACCAAAACAGCATGGCAGGGTTTGGGCTTTCTAACATGGACGAGTTTGCGATGGGAAGCACCACGGAGTCTAGTTGCTATGGGATCACTAAAAACCCACGAGATAAAAACAGAGTGCCTGGAGGGAGTAGCGGAGGGAGTGCAGCAGCGGTAGCGGGTGGCTTAGCGGTGGCGGCTTTAGGGAGCGATACGGGCGGATCTATCAGGCAGCCGGCAAGCTATTGCGGGTGCGTGGGGTTAAAACCCACTTATGGGAGGGTGAGCCGTTATGGTTTGATCGCG…	402	GVPILIKDNISVKGWEITCSSKILEGYVAPYHASAIENLHQNSMAGFGLSNMDEFAMGSTTESSCYGITKNPRDKNRVPGGSSGGSAAAVAGGLAVAALGSDTGGSIRQPASYCGCVGLKPTYGRVSRYGLIAYCSSFDQIGPITQNVEDASILFDAISGYDSKDSTSANLKPTQTFKNLNRDKRFKIAILRDHIKDASNEVQLAYENTLKALKEMGHEIVEKKMLDSHYQISIYYIISMAEASSNLARFDGVRYGRRAQNIKDLKELYLKSRSEGFGDEVKRRIMLGNFVLSSGYYDAYYLKAQQMRLIIKEQYNKIFEEVDLIFTPVAPTSAHLFNYHASPLEMYLSDIYTIGANLSGLPALALPVAKDPLGLPIGMQFIAKAFDEQSLLDVSYALE…
	17	UN000039	1311	CGCATTTTGATCGCTAATAGAGGCGAGATCGCTTTAAGAGCGATCCAAACCATTCAAGAAATGGGTAAAGAATCCATAGCCATTTATTCTATCGCTGACAAAGACGCCCACTACCTCAATACGGCTAGTGCAAAAGTGTGTATAGGGGGGGCCAAATCCAGCGAGAGTTACTTGAATATCCCTGCGATCATTAGTGCGGCGGAATTGTTTGAAGCGGATGCGATTTTCCCCGGGTATGGGTTTTTGAGTGAAAACCAGAATTTTGTAGAGATTTGCTCGCACCATTCTTTGGAATTTATTGGTCCGAGCGCAAAAGTCATGGCTTTAATGAGCGATAAATCCAAAGCCAAAAGCGTGATGAAAGAAGCCGGCATGCCTGTGATTGAGGGCAGTGATGGG…	437	RILIANRGEIALRAIQTIQEMGKESIAIYSIADKDAHYLNTASAKVCIGGAKSSESYLNIPAIISAAELFEADAIFPGYGFLSENQNFVEICSHHSLEFIGPSAKVMALMSDKSKAKSVMKEAGMPVIEGSDGLLKSYQEAEEIADKIGYPVIIKAAAGGGGRGMRVVEDKSKLKNLYLAAETEALSAFGDGSVYLEKFINKPKHIEVQILADKHGNVIHVGERDCSVQRRQQKLIEETPAVVLEEGVRERLLETAIKAAKYIGYVGAGTFEFLLDSNMKDFYFMEMNTRLQVEHTISEMVSGLNLIEWMIKIAQGEKLPNQESFSLKGHAIECRITAEDPKKFYPSPGKITEWIAPGGVNVRLDSHAHANYVVPTHYDSMIGKLIVWGENRERAIAKM…
	18	UN000040	1452	AATTTTGAACTTGATTGCGATATGGCTGAAGTAGGAAAAGTCGTTTCATACGCTGATGGTGTGGCTAAGGTTTATGGCTTAAATGGTGTGATGTCGTATGAAGTGCTGGAGTTTGAAACAGGGGATAAAGGCGTTGCAGCTAACTTAGAAGAAGATAGCGTTGGCGTGATTGTGTTTGGTTTTGGCAACAATATTAAAGAGGGGACTAGCGTTAAACGCACGAAGAGTTTGATGAAAGTTCCTGTTGGCGATGCGGTTGTAGGGCGTGTGCTAAACGCTTTGGGTGAGCCTATTGATGGCAAGGGTGAGATAGAAACGAATGAGTTCAGTCTCATCGAGCAAAAAGCTCCGGGCATTATGGACAGAAAATCTGTGCATGAGCCTTTGCAAACTGGCATT…	484	NFELDCDMAEVGKVVSYADGVAKVYGLNGVMSYEVLEFETGDKGVAANLEEDSVGVIVFGFGNNIKEGTSVKRTKSLMKVPVGDAVVGRVLNALGEPIDGKGEIETNEFSLIEQKAPGIMDRKSVHEPLQTGIKAIDALVPIGRGQRELIIGDKQTGKTTVAIDAIINQKGQNVICIYVAIGQKESTVAQVVRKLEEYGAMEYSVVINASASDSAAMQYLAPYSGVAMGEYFRDHARHALIIYDDLSKHAVAYREISLILRRPPGREAFPGDVFYIHSRLLERAAKLCDEKGAGSLTALPIVETQAGDVSAYIPTNIISITDGQIFLETDLFYSGIRPAINVGLSVSRVGGAAQIKATKQVSGTLRLDLAQYRELQAFTQFASDLDEASKKQLERGQRM…
	19	UN000043	1380	TTTTTGCCTTTAATCGGTGCGATTTATGCGGGGCTGTTTGGGGCTAAAGCTAAAGCGTTGCATGTGGGCGTTTTCAATTCTTTGTGCGTGCTGGTTTCTTTCATTGGTGCGGTGGTTCTTTTCATTCAAGCATGGCATCATCAAAGCTATGAAAAATATTTATTTGACTGGATCGTGGTAGGGAATTTTAAAGTCGGCTTTTCTCTCATGCTGGACAATATCAATGCGGTCATGATTGTCGTGGTCACTTTAGTTTCTTTCTTAGTGCATGTGTATTCTATAGGCTATATGGAGCATGATACAGGGTTTAACCGCTATTTTTCCTACCTCAGCGGCTTTGTGTTTTCCATGCTGGTGTTGGTGTTGAGCGATAATTTTTTAGGGCTTTTCATTGGCTGG…	460	FLPLIGAIYAGLFGAKAKALHVGVFNSLCVLVSFIGAVVLFIQAWHHQSYEKYLFDWIVVGNFKVGFSLMLDNINAVMIVVVTLVSFLVHVYSIGYMEHDTGFNRYFSYLSGFVFSMLVLVLSDNFLGLFIGWEGVGLCSYLLIGFWYHKKSANDASIEAFVMNRITDLGMLMGIILIFWNFGTLQYKEVFSMLNNADYSMLFYISVFLFIGAMGKSAQFPMHTWLANAMEGPTPVSALIHAATMVTAGVYLVIRANPLYSAVFEVGYFIACLGAFVALFGASMALVNKDLKRIVAYSTLSQLGYMFVAAGLGAYAIALFHLFTHAFFKSLLFLGSGNVMHAMEDNLDITKMGALYKPMKITAIFMIIGSVALCGIYPFAGYFSKDKILEVAFGMHHHI…
	20	UN000044	1269	AAAGAAAGGCATTTGCCTAGCGGTGTGATTTTCCCTAGAAACGAGCAAGAAATCAGCCAGATTTTAAAATATTGCAACGAGCATCGCATCATCGTTGTGCCTAGGGGGGCTGGGAGCGGTTTTACAGGGGGGGCGTTGAGCGTGAGCGGGGGGTTAGTTTTAAGCGTGGAAAAGCATTTGGATAAGATTTTAGAGATTGACACTAAAAATTTAATCGCTAGAGTAGAACCGGGCGTGATTAACAAGCATTTCCAAAACGAAGTGGAAAAATTGGATTTATTCTACCCCCCAGATCCAGCGAGCGAAAATCAAAGCACTTTGGGGGGGAATGTCGCTGAAAATGCCGGTGGCATGCGCGCGGCTAAATACGGCATCACTAAAGATTATGTCATGGCTTTA…	423	KERHLPSGVIFPRNEQEISQILKYCNEHRIIVVPRGAGSGFTGGALSVSGGLVLSVEKHLDKILEIDTKNLIARVEPGVINKHFQNEVEKLDLFYPPDPASENQSTLGGNVAENAGGMRAAKYGITKDYVMALRVVLANGEIIRAGKKTIKDVAGFNVAGLMIASEGCLGVISEITLKLLAKPPLKQSAMGVFNHIEDAMNAVYKTMSSGVTPVAMEFLDNLSIRAVEERFSKGLPKDAGAILITQVDGVVKEQIAWQLNEIEKHFKANSCVDFKIAQNEQEEQDLWFSRRNASQSISVYGKKKLNEDVTVPRASLPSLLQEVAKISQKYGFKIPCFGHTGDGNVHVNIMLEDPKRDLEKGHKAMEEIFQAAISLEGTLSGEHGIGLSKAKFMPLAFNH…
	21	UN000046	1521	TCTCCAGGGCAAAGAAACGCGATTTTAGCTAACCATATCACCCTCATGCAAGAGCTTTAAAAAGTCCTAAAAATGGCGCAAAAAACTCTTTTGATTATCACTGATGGCATTGGGTATCGTAAAGATAGCGATCATAACGCTTTCTTCCATGCCAAAAAACCCACTTATGATTTGATGTTTAAAACCTTGCCTTATAGCCTGATTGATACGCATGGCTTGAGCGTGGGCTTACCTAAGGGGCAAATGGGAAATTCTGAAGTGGGGCATATGTGTATTGGGGCTGGTAGGGTGCTCTATCAGGATTTAGTCAAAATTTCTTTAAGCCTTCAAAACGATGGGTTAAAAAACAACCCCGCTTTTTTAAACACGATCCAAAAAAGCCCTGTGGTGCATCTTATG…	507	SPGQRNAILANHITLMQEL*KVLKMAQKTLLIITDGIGYRKDSDHNAFFHAKKPTYDLMFKTLPYSLIDTHGLSVGLPKGQMGNSEVGHMCIGAGRVLYQDLVKISLSLQNDGLKNNPAFLNTIQKSPVVHLMGLMSDGGVHSHIEHFIALALECEKSHKKVFLHLITDGRDVAPKSALTYLKQMQNICNENIQIATISGRFYAMDRDKRFERIELAYHSLMGLSHTPLSPSEYIQSQYDKNITDEFIMPACFKDYCGMQDDESFIFINFRNDRAREIVSALGQKEFSGFKRQAFKKLHIATMTPYDNTFPYPVLFPKESVQNTLAEVVSQHNLTQSHIAETEKYAHVTFFINGGVETPFKNENRVLIQSPKVTTYDLKPEMSAKEVTLAVLEQMKLGT…
	22	UN000047	1428	CAAACCACTGCTTTTGGTGCTCCCGTTTGGGATGACAACAATGTGATTACGGCTGGCCCTAGAGGTCCTGTTTTATTGCAAAGCACTTGGTTTTTGGAAAAGTTAGCGGCGTTTGACAGAGAAAGAATCCCTGAAAGGGTAGTGCATGCTAAAGGAAGCGGAGCTTATGGCACTTTCACCGTGACTAAAGACATCACTAAATACACTAAAGCGAAAATTTTCTCTAAAGTGGGCAAAAAAACCGAATGCTTTTTCAGATTTTCTACTGTGGCAGGGGAAAAAGGCAGTGCGGATGCGGTAAGAGACCCTAGAGGTTTTGCGATGAAGTATTACACTGAAGAAGGTAACTGGGATTTAGTAGGGAACAACACGCCTGTTTTCTTTATCCGTGATGCGATC…	476	QTTAFGAPVWDDNNVITAGPRGPVLLQSTWFLEKLAAFDRERIPERVVHAKGSGAYGTFTVTKDITKYTKAKIFSKVGKKTECFFRFSTVAGEKGSADAVRDPRGFAMKYYTEEGNWDLVGNNTPVFFIRDAIKFPDFIHTQKRDPQTNLPNPDMVWDFWSNVPESLYQVTWVMSDRGIPKSFRHMDGFGSHTFSLINAKGERFWVKFHFETMQGVKHLTNEEAAEVRKYDPDSNQRDLFNAIARGDFPKWKLSIQVMPEEDAKKYRFHPFDVTKIWYLQDYPLMEVGIVELNKNPENYFAEVEQAAFSPANVVPGIGYSPDRMLQGRLFSYGDTHRYRLGVNYPQIPVNKPRCPFHSSSRDGYMQNGYYGSLQNYTPSSLPGYKEDKSARDPKFNLAH…
	23	UN000048	915	TTTAAGATTTTTTCAGGGAGCGCTCACCCTGCATTTGGCAAAGAAGTGTCAAAGCATTTAGGCTTTCCCTTATCCAAAGCGGTGATTGGGAAATTCAGCGATGGCGAAATCAATATCCAAATCAGCGAATCGGTGCGCGGTAAGGATATTTTTATTATCCAGCCCACTTGCGTGCCTGTCAATGACAATTTAATGGAATTGTTAGTCATGGTAGATGCTTTAAGGCGCAGTTCGGCCAATTCTATCACAGCGGTGTTGCCGTATTTTGGCTATGCCAGACAGGACAGAAAAGCGGCTCCACGAGTGCCTATCACGGCTAAAATGGTCGCTAATTTGATGCAAGAAGTGGGGATTGAAAGGATCATTACGATGGATTTGCATGCCGGGCAAATCCAAGGC…	305	FKIFSGSAHPAFGKEVSKHLGFPLSKAVIGKFSDGEINIQISESVRGKDIFIIQPTCVPVNDNLMELLVMVDALRRSSANSITAVLPYFGYARQDRKAAPRVPITAKMVANLMQEVGIERIITMDLHAGQIQGFFDVPVDNLYGSIVFRDYIRSKALKNPIIASPDVGGVTRARYFANQMGLDLIIVDKRREKANESEVMNIIGSAKEHDVILVDDMIDTAGTICKAALALKEQGATSVMALGTHAVLSGNAIKRIKESALDEVVVTNSIPLVQKCDKITTLSVAPLFAEVIRRIYHNESVQSLF
	24	UN000051	1377	CGTATTGAGCATGATTTCATTGGGCAAATGGAAATTAGCGACGAGGTTTATTACGGGATCCAAACTTTAAGAGCGAGTGAAAATTTTTTCATCACTAACGACAAGCTTTGCAGTTATCCTGTTTTTATCAAATCTTTCGCTCAAGTCAAAAAAGCGGCCGCTTTAGCGAACGCGCAATTAGGCTTGATTGATGAAAAGCTTAAAATTGCGATTTGCCATGCGTGCGATTTGTTGGTTGATGGCAAATACCATGATCAATTCATTGTGGATATGATTCAAGGGGGGGCTGGCACAAGCACGAACATGAACATGAATGAAGTGATTGCTAATTTGGCTTTAGAATACATGGGGCATCAAAAGGGCGAGTATCAATTTTGCCACCCAAACGACCATGTCAAC…	459	RIEHDFIGQMEISDEVYYGIQTLRASENFFITNDKLCSYPVFIKSFAQVKKAAALANAQLGLIDEKLKIAICHACDLLVDGKYHDQFIVDMIQGGAGTSTNMNMNEVIANLALEYMGHQKGEYQFCHPNDHVNRSQSTNDAYPSALKIAIYERLSNLVAPMKALRDAFAQKAKEFSHVIKMGRTQLQDAVPMTLGQEFETYALMVDRDIEQVLDARNWVRELNLGGTAIGTGINSHPDYRSLIEKKIQEVTGRPFVMANNLIEATQSTGAYVQVSGVLKRIAVKLSKVCNDLRLLSSGPRAGLNEINLPKMQPGSSIMPGKVNPVIPEVVNQVCFAVIGNDLSVALAAEGGQLQLNVFEPVIAYKLFHSFVILGRAIETLTTKCVEGITANEKICHDYV…
	25	UN000052	1038	ATCGTTACGCGCTTCGCCCCGTCGCCCACCGGCTACCTCCACATAGGAGGCTTAAGGACAGCCATTTTCAATTATCTTTTTGCACGAGCCAATCAAGGAAAGTTTTTTTTACGCATTGAAGACACGGATTTGAGTCGTAACTCCATAGAAGCGGCTAACGCCATTGTAGAAGCTTTCAAATGGGTGGGGCTAGAATACGATGGCGAAATCCTCTATCAATCCAAACGCTTTGGAATTTATAAAGAATATATCCAAAAACTCTTAGATGAAGACAAAGCCTATTACTGCTACATGAGTAAAGATGAGTTGGACGCTTTGAGAGAAGAACAAAAGGCCAGGAAAGAAACCCCACGCTATGACAATCGTTATCGTGATTTTAAAGGCACGCCCCCTAAAGGC…	346	IVTRFAPSPTGYLHIGGLRTAIFNYLFARANQGKFFLRIEDTDLSRNSIEAANAIVEAFKWVGLEYDGEILYQSKRFGIYKEYIQKLLDEDKAYYCYMSKDELDALREEQKARKETPRYDNRYRDFKGTPPKGIEPVVRIKVPQNEIIVFNDGVKGEVKVNTNELDDFIIARSDGTPTYNFVVIVDDALMGITDVIRGDDHLSNTPKQIVLYKALNFKIPNFFHVPMILNEEGQKLSKRHGATNVMDYQERGYLKEALVNFLVRLGWSYQDKEIFSMQELLECFDPKDLNSSPSCFSWHKLNWLNAHYLKNQSAQELLELLKPFSFSDLSHLNPAQLDRLLDALKE
	26	UN000053	969	CCTTACACGCCCATTTGGATGATGAGGCAAGCGGGGCGTTACCTTAGCGAATACCAAGAGAGCCGAAAGAAAGCGGGGAGTTTCTTGGAATTGTGTCAAAATAGCGATTTGGCCACAGAAGTTACCTTACAACCGGTAGAGATTTTAGGCGTGGATGCGGCTATTTTGTTTAGCGATATTTTAGTAGTGCCTTTGGAAATGGGCTTGAATTTGGAGTTTATCCACAAAAAGGGGCCGCATTTTTTAGAGACGATTACGGATTTAAAAAGCGTGGAAAGCCTGAAAGTAGGAGCTTATAAACAACTAAACTATGTCTATGATACGATTTCTCAAACGCGCCAAAAACTTTCTAAAGAGAAAGCGTTAATCGGTTTTTGCGGATCGCCTTGGACTTTAGCG…	323	PYTPIWMMRQAGRYLSEYQESRKKAGSFLELCQNSDLATEVTLQPVEILGVDAAILFSDILVVPLEMGLNLEFIHKKGPHFLETITDLKSVESLKVGAYKQLNYVYDTISQTRQKLSKEKALIGFCGSPWTLATYMIEGEGSKSYAKSKKMLYSEPEVLKALLEKLSLELIEYLSLQIQAGVNAVMIFDSWASALEKEAYLKFSWDYLKKISKELKKRYPHIPVILFPKGIGAYLDSIDGKFDVFGVDWGTPLTAAKKILGGKYVLQGNLEPTRLYDKNALEEGVEGILKVMGNQGHIFNLGHGMLPDLPRENAKYLVQLVHA
	27	UN000055	1965	GAAGATTTAGAATTCGTTACAAAAGTCTTTAACCCTAACAGAGCGTTTGCCAAGCAAGCCAGGATTAAAAACATGTGCGAATATAAGGATTTAGTGCATGAAGCCAATGAAGATTACGAACATTTTTGGGGCGAGTTAGCCAAGCAAAAACTCACATGGTTTAAACCTTTTGATAAGGTTTTAAACAGCGATAACGCCCCTTTTTTCAAATGGTTTGAAAACGGCAAAATCAATGTTTCTTACAATTGCATAGACAGGCATTTAAAAGACAAAAAAAATAAAGTGGCGATCATTTTTGAAGGGGAAATGGGGGATTATAATGTCATCACTTACAGAAAACTCCACTCTGAAGTCAATAAAACAGCCAACCTTTTAAAAAACGAATTCAATGTCAAAAAA…	655	EDLEFVTKVFNPNRAFAKQARIKNMCEYKDLVHEANEDYEHFWGELAKQKLTWFKPFDKVLNSDNAPFFKWFENGKINVSYNCIDRHLKDKKNKVAIIFEGEMGDYNVITYRKLHSEVNKTANLLKNEFNVKKGDRVIIYMPMIVESVYMMLACARIGAIHSIVFAGFSPEALRDRINDAQAKLVITADGTFRKGKPYMLKPALDKALENNACPSVEKALIVIRNAKEIDYVRGRDFVYNEMVNYQSDKCELEMMDSEDPLFLLYTSGSTGKPKGVQHSSAGYLLWAQMTMEWVFDIRDNDNFWCTADIGWITGHTYVVYGPLACGATTLILEGTMSYPDYGRWWRMIEEYRVDKFYTSPTAIRMLHAKGENEPLKYNLESLKVLGTVGEPINPTAWKW…
	28	UN000056	783	TGGGTGAAATGCCCTAAATGTTATGCGTTAATGTATCATAAAGAAGTGTTTAGTAAATACAGCGTGTGTTTGAAATGCCATTACCATTTCCGCATGAACGCAACTGAAAGGATTGAATTTTTATGCGATGTGGGGAGTTTTGAAGAGTTTGACAAGCATTTACGGCCTAATGATCCTTTAAATTTCGTGGATAAAGAGAGCTATAAACAACGCATTAAAAAATACGAAAAAAGGACTAACCGCCCAAGCTCCGTGATCAGCGGTGAGGCTAAAATCAACCGCATGCCTTTGCAGATCGTGGTGTTTGATTTCAGCTTTATGGGGGGGAGTTTAGGCTCTGTGGAGGGCGAAAAGATTGTAAGAGCGATCAACCGCGCGGTCGCTAAAAAAGAAGCGTTA…	261	WVKCPKCYALMYHKEVFSKYSVCLKCHYHFRMNATERIEFLCDVGSFEEFDKHLRPNDPLNFVDKESYKQRIKKYEKRTNRPSSVISGEAKINRMPLQIVVFDFSFMGGSLGSVEGEKIVRAINRAVAKKEALLIVSASGGARMQESTYSLMQMAKTSAALNRLSEAKLPFISLLSDPTYGGVSASFAFLGDLIIAEPGAMIGFAGPRVIKQTIGADLPEGFQTAEFLLEHGLIDMIVHRKDLKKTLSDLIAMMTHKTSKI
	29	UN000057	645	TTTTTATGTTTAGGGGGCGATGGCACGATTTTAGGGGCGTTAAGAATGACGCATTCTTACAATAAGCCATGTTTTGGGGTGAGAATAGGGAATTTAGGGTTTTTGAGTGCGGTTGAATTGAATGGCTTGAAAGATTTCTTACAAGATCTCAAGCAAGATAAGATCAAATTAGAAGAGCATTTGGCATTAGAGGGCCGTATCGGGAAAACCTCTTTTTATGCGATCAATGAAATTGTGATCGCCAAAAAAAAAGCTTTAGGGGTTTTAGACATCCAAGCTTATGCGGGCCATACGCCCTTTAACACCTATAAAGGCGATGGGCTTATCATTGCCACGCCCTTAGGCTCGACCGCTTATAATTTGAGCGCTCATGGGCCTATTGTGCATGCTTTAAGCCAG…	215	FLCLGGDGTILGALRMTHSYNKPCFGVRIGNLGFLSAVELNGLKDFLQDLKQDKIKLEEHLALEGRIGKTSFYAINEIVIAKKKALGVLDIQAYAGHTPFNTYKGDGLIIATPLGSTAYNLSAHGPIVHALSQSYILTPLCDFSLTQRPLVLGAEFCLNFCAHEDALVVIDGQATYDLKANQPLYIQKSPTTTKLLQKNSRDYFKVLKEKLLWGE
	30	UN000058	993	AATTTAGATTGGAAAAATTTGGGCTTTAGCTACATTAAAACGGATTTTCGCTTCATCGCTACTTATAAAAACGGCTCTTGGTCGCAAGGTGAATTGGTGAGCGAAAATGCGTTGCAAATCAGCGAAGGCTCGCCGGTCTTGCATTATGGGCAGGCTTGTTTTGAAGGCTTGAAGGCTTACCGCTCTCAAAAGGGGAAGGCTTTACTCTTTCGCCCTTTAGAAAACGCCAAACGCTTGCAAACTTCATGCGAAAGACTGCTCATGCCTAAGGTGAGCGAAGAGCTGTTTTTAAAAGCATGCGCTGAAGTAGTTAAAGCGAATCAAAAATGGCTCGCTCCTTACAAAAGCGGGGCGAGTTTGTATTTGCGCCCTTTTGTCATAGGCGTGGGGGATAATTTG…	331	NLDWKNLGFSYIKTDFRFIATYKNGSWSQGELVSENALQISEGSPVLHYGQACFEGLKAYRSQKGKALLFRPLENAKRLQTSCERLLMPKVSEELFLKACAEVVKANQKWLAPYKSGASLYLRPFVIGVGDNLGVKPASEYLFIVFCAPVGAYFKGGIEKGGARFITTAFDRAAPKGTGGVKVGGNYAASLLAHKMATEQGYDDCIYLDPATHTKIEEVGAANFFGITHDNAFITPYSPSILPSITRKSLMVLAKEYLNLKVEEREILVDELGAFREAGACGTAAIITPIKEIAHNNKSYFFEAPGHITKQLYDLLLSIQQGEQEAPKDWI
	31	UN000059	1128	GGCGAGAGCGTGTATGTGGTAACGGTCAATGATTACTTAGCCCATAGGGATTCTAAGGAAATGGAGCCGTTGTATCAATTCTTAGGCTATAGCGTAGGCACGATCACTGCGAGCGTGCGAGACGATGATGAGCGATTAGAAATTTATTCTAAAGACATTGTTTATGGTACTAATAATGAATTTGGCTTTGATTACCTAAGGGATAACATGAAATATTCTTTAGAGCATAAGGTGCAAAAATCCCATGCGTTCGCCATTGTTGATGAGGTGGATTCCATTTTAATTGATGAAGCGAGAACCCCTTTAATCATTTCAGGGCCTGTGGATAGGCACATGGAAAATTACAACAAGGCTGATGAAGTCGCTAAAAGCATGCAAGTGGAAACCGATTTCACCATA…	376	GESVYVVTVNDYLAHRDSKEMEPLYQFLGYSVGTITASVRDDDERLEIYSKDIVYGTNNEFGFDYLRDNMKYSLEHKVQKSHAFAIVDEVDSILIDEARTPLIISGPVDRHMENYNKADEVAKSMQVETDFTIDEKNRAILITEEGIKKAENLFGVDNLYKIENAALSHHLDQALKANYLFFIDKDYIVANNEVVIVDEFTGRLSEGRRFSEGLHQALEAKEGVSIKEESQTLADITFQNYFRMFSKLSGMTGTAQTEATEFLEIYNLEVVSIPTNLAIKRKDLNDLIYKSEKEKFDAVILKIKELHDKGQPVLVGTASIEKSETLHALLKKERIPHTVLNAKQHTKEAEIIKDAGLKGAVTIATNMAGRGVDIKL
	32	UN000060	1110	GCCCTAAATTTAGCAACTAAAAGCCATAAGGGGCAATACAGAAAAAGCGGCGAGCCTTATATTGTCCATCCTATTTGTGTGGCAAGCTTGGTAGCGTTTTGTGGGGGCGATGAGGCGATGGTGTGTGCAGCGCTTTTGCATGATGTAGTAGAAGACACGCCCTGTAAAATTGAAACGATTGAGCAAGAATTTGGGCAAGATGTGGCTAATTTAGTGGATGCGCTCACTAAAATCACTGAAATCAGGAAAGAAGAGTTAGGAGTGAGCTCTCAAGATCCCAGAATGGTAGTTTCAGCGCTCACTTTTAGAAAGATCCTAATTAGCGCGATACAAGATCCAAGAGCCTTAGTGGTAAAGATTAGCGACAGGTTGCACAACATGCTCACCTTAGACGCCTTG…	370	ALNLATKSHKGQYRKSGEPYIVHPICVASLVAFCGGDEAMVCAALLHDVVEDTPCKIETIEQEFGQDVANLVDALTKITEIRKEELGVSSQDPRMVVSALTFRKILISAIQDPRALVVKISDRLHNMLTLDALPHDKQVRISKETLAVYAPIASRLGMSSIKNELEDKSFYYIYPEEYKNIKEYLHKNKQSLLLKLNAFASKLEKKLFDSGFSHSDFKLVTRVKRPYSIYLKMQRKGAVNIDEILDLLAIRILLKNPIDCYKVLGIIHLNFKPIVSRFKDYIALPKENGYKTIHTTIFDESSVYEVQIRTFDMHMGAEYGNSAHWKYKAGGVDHEDHHEGMRWLQNFKYHDSDLKNDPKEFYELAKNDLY
	33	UN000061	1179	AAAGGCAAAGACATGAATGAAGTGGTTGTAGTGGCGGCAAAGCGGAGTGCGGTGGGGAGTTTTTTAGGCTCTCTAAAGAATGTGGGTGCTAGAGAAATGGGTGTTAGCGTGCTTAAAGACGCTTTGAATGCGAGCTCTCTTAAGCCTAGCGATGTGGATTCTGTCATTTTAGGCAATGTTTTAGGCGCTGGTTTGGGTCAAAATATCGCCAGACAGATCCAACTAGACGCTGGCATCCCTAATGACAAAAACGCTTTTAGCGTCAATATGGTTTGCGGATCGTCTATGAAAGCTATCCAGTTAGCGCATGACAGCATCATGCTTGGGCGCGATGAGGTGGTGGTGTGCGGTGGCGTGGAAAACATGAGCATGGCACCTTATTTGTCGTTTGACATGCGA…	393	KGKDMNEVVVVAAKRSAVGSFLGSLKNVGAREMGVSVLKDALNASSLKPSDVDSVILGNVLGAGLGQNIARQIQLDAGIPNDKNAFSVNMVCGSSMKAIQLAHDSIMLGRDEVVVCGGVENMSMAPYLSFDMRDGKRMGNANMIDSMIHDGLWDAFNDYHMGITADNVAQAYHISREEQDNFALQSQLKARAAINAKKFQEEITPIEIANKKGVVVFKEDEYPRDTTLESLAKLKPAFKKDGSVTAGNSSGINDGASIIILCSAKKAQALGLKAMATIKGFGLGACSPDIMGICPSIAIKNNLKNVKMNLNDINLFELNEAFAAQSLAVLKELELNPNIVNVNGGAIAIGHPIGASGTRILVTLLHEMKRSGHGVGCASLCVGGGQGLSVVVE
	34	UN000062	3246	AAACGCACCGATATTTCCAACATTCTACTGATAGGATCAGGCCCTATTGTGATCGGGCAAGCTTGTGAGTTTGACTACTCAGGGACTCAAAGTTGTAAAACCTTAAAATCTTTAGGTTATAGAGTGATCTTAATCAATTCTAACCCGGCCACCGTGATGACTGACCCTGAATTTTCTCATCAAACTTATATCCAGCCCATCACCCCAGAAAATATCGCCGCTATCATCAAAAAAGAAAAGATTGACGCTATTTTACCCACAATGGGCGGGCAAACCGCTTTGAATGCGGTCATGCAGATGCATCAAAAGGGCATGTTAGAAGGCGTGGAGCTTTTAGGGGCTAAGATTGAAGCGATTAAAAAAGGCGAAGACAGGCAGGCTTTCAAAGAAGCGATGTTA…	1082	KRTDISNILLIGSGPIVIGQACEFDYSGTQSCKTLKSLGYRVILINSNPATVMTDPEFSHQTYIQPITPENIAAIIKKEKIDAILPTMGGQTALNAVMQMHQKGMLEGVELLGAKIEAIKKGEDRQAFKEAMLKIGMDLPKGRYAYSELEALEAISEIGFPAIIRASFTLAGGGSGVAYNIEEFQELAKNALDASPINEILIEESLLGWKEYEMEVIRDSKDNCIIVCCIENIDPMGVHTGDSITIAPSLTLTDKEYQRMRDASFAILREIGVDTGGSNVQFAIHPETLRMVVIEMNPRVSRSSALASKATGFPIAKVATMLAVGFSLDEIKNDITNTPASFEPSLDYIVVKIPRFAFEKFAGVSSTLGTSMKSIGEVMAIGGNFLEALQKALCSLENN…
	35	UN000063	1983	CGTATCGCTGATTTAATCGCAGCGGCCTTGCATTTAAAAAAAGATCAAGCGTATTCTCTTTTTGCCAACAACAACACCGAACAGCGCTTGTTGGATTTGATTGATATTGTGATAGAAGAGACTAAAACCCAAAAACTCCAAAAAGAAATCAAATCCAAAGTCCATCAAAAAATGGAGCAAACCAATAAGGAATATTTCTTAAAAGAGCAGCTCAAACAAATCCAAAAAGAGCTTGGCACAGACAAACAGCGAGATGAAGATTTAAACCAATACTACCAAAAACTAGAAAGCATCAAGCCTTTTTTAAAAGAAGAAGCGTTTAAGGAAATCAAAAAGCAAATTGACCGACTGAGCCGAACCCATGCGGACAGCTCTGATAGCGCGACTTTACAAAATTAC…	661	RIADLIAAALHLKKDQAYSLFANNNTEQRLLDLIDIVIEETKTQKLQKEIKSKVHQKMEQTNKEYFLKEQLKQIQKELGTDKQRDEDLNQYYQKLESIKPFLKEEAFKEIKKQIDRLSRTHADSSDSATLQNYIETMLDVPFGQYEKKALDIKHVKEQLDNDHYSLKRPKERIVEYFATMQLLEMRHKKKPEKKDKAKGTILCFYGPPGVGKTSLANSIAKAIERPLVRIALGGLEDVNELRGHRRTYIGSMPGRIVQGLIEAKKMNPVMVLDEIDKVDRSVRGDPASALLEILDPEQNIAFRDHYANFSIDLSQVIFIATANNIDRIPAPLRDRMEFISVSSYTPNEKEEIAKNYLIPQELEKHALKPSEVDISHECLKLIIEKYTREAGVRDLRRQI…
	36	UN000065	1626	CACTAAAAAACATTATTATTAAGGATACACAATGGCAAAAGAAATTAAATTTTCAGATAGCGCAAGAAACCTTTTATTTGAAGGCGTGAGACAACTCCATGACGCTGTTAAAGTAACTATGGGGCCAAGAGGCAGGAATGTGTTGATTCAAAAAAGCTATGGCGCTCCAAGCATCACCAAAGATGGCGTGAGCGTGGCTAAAGAGATTGAATTAAGTTGCCCGGTGGCTAACATGGGTGCTCAACTCGTTAAAGAAGTGGCGAGCAAAACCGCTGATGCTGCCGGCGATGGCACGACCACAGCGACCGTGCTGGCTTATAGCATTTTTAAAGAAGGTTTGAGGAATATCACGGCTGGGGCTAACCCCATTGAAGTGAAACGAGGCATGGATAAAGCCGC…	542	H*KTLLLRIHNGKRN*IFR*RKKPFI*RRETTP*RC*SNYGAKRQECVDSKKLWRSKHHQRWRERG*RD*IKLPGG*HGCSTR*RSGEQNR*CCRRWHDHSDRAGL*HF*RRFEEYHGWG*PH*SETRHG*SR*SDHQ*A*KSQQKSGR*RRNHPSGDHFCKLRSQYWETHR*RYGKSG*RRRDHR*RS*GH*R*IGCCRGHAI**RLSLPLLCNQR*ENDRSIG*RLHPFNG*KNL*HERHPPAIGKNHERGQTAFNHR*RH*GRSFNDSSGE*IKRRVEYRSG*GSRLWGQEKRNAQRHRYFNRRSSH*RRIGLESRKR*SGVFRQSRKDCD*QRQHHDRRWQRP*R*R*RQSRANQNPNCKHDKRL*QRKIARKVG*TLWRCGCD*SGRCERSGNE…
	37	UN000067	861	ATTTGTGCGAGCATCCTCCAGCATGCTTATTGCGGCTCTAGAAAAAAAACCATAGAGCATACAGCGAACTTGCTTGAACAAGCGCTAAAAAAACACCCTAAGACCAATTTAGTGGTGTTGCAAGAATTAAACCCTTATAGTTATTTTTGCCAGAGCGAGAACCCTAAATTTTTTGATTTGGGCGAATATTTTGAAGAAGATAAGGCTTTTTTTAGCGCTTTAGCTCAAAAATTTCAAGTGGTGCTTATCGCTTCTTTGTTTGAAAAGCGCGCTAAAGGGTTGTATCACAATAGCGCGGTTGTGTTTGAAAAAGATGGATCAATCGCTGGAGTGTATCGCAAAATGCACATTCCTGATGACCCAGGGTTTTATGAAAAATTTTATTTCACGCCGGGGGAT…	287	ICASILQHAYCGSRKKTIEHTANLLEQALKKHPKTNLVVLQELNPYSYFCQSENPKFFDLGEYFEEDKAFFSALAQKFQVVLIASLFEKRAKGLYHNSAVVFEKDGSIAGVYRKMHIPDDPGFYEKFYFTPGDLGFEPIVTSVGKLGLMVCWDQWYPEAARIMALKGAEILIYPSAIGFLEEDSNEEKKRQQNAWETIQRGHAIANGLPLIATNRVGVELDPSGAIKGGITFFGSSFVVGALGEFLAKASDREEILYAEIDLERTEEVRRMWPFLRDRRIDFYNDLL
	38	UN000068	1701	GTCATCATTATTGAAAGTCCTAATAAGGTAGCTAAGATTAGAGAAATCATAGGAGCTAAGGTCTTTGCTACCATAGGGCATTTTATGCAACTTAAAAGCTATGATGAAAGTAATGGCTTTAAGCCGACTTTTGATTATGACCAAGAAAAGAAAAAACATATTTTTGAGATGATAGAGGCGTGTAAAAACAAAAAGGTTTATATCGCCACTGACCCTGATAGAGAGGGCTATGCTATAGGCTATATGTTTTATCAAAAAATCAAAAATGTAGCTAGTTCTATTTATAGGGCGGAGTTTTTTGAAATCACACCAAGTGGGATTAACAAGGGCTTACAAAACGCCCTTTTATTTGAAAACACCAATAAGCAAATGTATCAAAGTGCTTTAGCAAGACGAGTT…	567	VIIIESPNKVAKIREIIGAKVFATIGHFMQLKSYDESNGFKPTFDYDQEKKKHIFEMIEACKNKKVYIATDPDREGYAIGYMFYQKIKNVASSIYRAEFFEITPSGINKGLQNALLFENTNKQMYQSALARRVADMLLGFTLSPYLGKALGQMKGSSAGRVQTPCLKLIVDRDREIEKFKALPENEKVSYQIQAKINDSANREVTIKHCDEKGEEIKFNDKEEALKLFESLKDNKACLLKDLKNSVVETKPKKPFITSTLLEKASSMLGLSISEVQSLAQNLFEAGLITYIRTDAESLSVEFLDETESFYAPIYKDLYLKREYKAGKQSQAEAHEAIRITHPHTTEDLESIVYNANITNQDALKLYQLIFERTIESQGKNAIYDKQDLLFKIKNEYFKC…
	39	UN000069	1581	AAATTTATATTCGTTACAGGGGGTGTGTTAAGCTCTCTAGGGAAAGGGATTTCATCTTCTTCAATCGCCACGCTTTTACAGCATTGCAATTACCAGGTTTCTATTTTGAAGATTGACCCTTATATCAATATTGATCCAGGCACCATGAGCCCTTTAGAGCATGGGGAAGTGTTTGTAACTAGCGATGGTGCTGAAACGGATTTAGACATCGGGCATTATGAACGCTTTTTGAACAGGAATTTAACGAGGTTGAATAATTTCACTACCGGGCAGATTTTTTCAAGCGTGATAGAAAATGAAAGGAAAGGGGAATATTTAGGCAAAACCATTCAAATCGTCCCCCATGTAACCGATGAAATCAAAAGGCGCATTAAAAGCGCGGCTAAGGGGTTGGATTTT…	527	KFIFVTGGVLSSLGKGISSSSIATLLQHCNYQVSILKIDPYINIDPGTMSPLEHGEVFVTSDGAETDLDIGHYERFLNRNLTRLNNFTTGQIFSSVIENERKGEYLGKTIQIVPHVTDEIKRRIKSAAKGLDFLIVEVGGTVGDMEGMFYLEAIRQLKLELGNEKVINVHVTLIPYIQTTNELKTKPTQHSVQELRRLGVTPQIILARSPKPLDKELKKKIALSCDVEQDSVIVATDTKSIYACPILFLQEGILTPIARRFNLNKLHPKMAAWNTLVEKIIAPKHKVKIGFVGKYLSLKESYKSLIEALIHAGAHLDTQVNIEWLDSENFNEKTDLEGVDAILVPGGFGERGIEGKICAIQRARLEKLPFLGICLGMQLAIVEFCRNVLGLKGANSTEF…
	40	UN000070	15321	GAAGAAATCTCAAAGCTTGTCGAGCTTCTTCGGGAAGAGATTTCTCCAAAAGACCTATCCATCAGACTCCGCTCAGATTCTCTTCGACCAGGCCTTGAGTTCTTCTACTCGATCCTCGATCAAGGAATCAGAGAGATCGAAGAAGGAAAGTTAGGGCTGGAGTCCTGGACTCAATCTGAGACTCAAGCTGTCCTCTCAATCGCCAGATCGATTCAATCGTCTTGTCGGGTTGTTAAAGTTGAGCATGCGGAATCGATAATTGTTGGCATCATTGAAAAGTTAGTGGAGTTCTGTGTTTGTTGCCTGGAGAGAAGATTAGCACTTGATGGTGGCGATGGCTCAGATTTCCAGAGCAATGTGGTCCAAATATTGGAGATAGCTTTGGTTGATGAGATGGAT…	5107	EEISKLVELLREEISPKDLSIRLRSDSLRPGLEFFYSILDQGIREIEEGKLGLESWTQSETQAVLSIARSIQSSCRVVKVEHAESIIVGIIEKLVEFCVCCLERRLALDGGDGSDFQSNVVQILEIALVDEMDKEFDASRPCPINVLVESLPTISVQTRVNLNKHVKCNLQGIHCSKEVKPVDRVLIALASECSQHDTQAMHFTEPIYRPDVNSMMPLAQHWAVAHVRCVPRLIMICRELVEAPTSCGESLEDSNLCSRLSFSLRIFRLLRNVMKDMPYISYDAGLLQAVACFSDVLPNLFRLRFELVNSESFTAEIGIESLSLSLLEEFLKFAQAVSCDGSIFQNIQTCMLASLFDILDVRVCIHDKSVASLKPPLVYSPRVVIYLLKLVGNIRSQPL…
	41	UN000072	1194	ATTTTAGTGTTGAATCTGGGCAGTTCGTCTATTAAATTTAAATTGTTTGACATGAAAGAAAACAAGCCCTTAGCGAGCGGTTTAGCCGAAAAAATCGGCGAAGAAATAGGGCAGTTGAAAATCAAATCGCATTTGCACCATAACGATCAAGAATTAAAAGAAAAGCTTGTGATTAAAGATCATGCGAGCGGGCTTTTAATGATTCGTGAGAATTTAACGAAAATGGGGATCATCAAAGATTTCAATCAAATTGACGCTATAGGGCATCGTGTGGTTCAAGGGGGGGATAAATTCCATGCCCCGGTTTTAGTGGATGAAAAAGTCATGCAAGAAATTGGCAATCTTTCTATTTTAGCCCCCTTACACAACCCAGCGAATTTAGCCGGTATTGAATTTGTC…	398	ILVLNLGSSSIKFKLFDMKENKPLASGLAEKIGEEIGQLKIKSHLHHNDQELKEKLVIKDHASGLLMIRENLTKMGIIKDFNQIDAIGHRVVQGGDKFHAPVLVDEKVMQEIGNLSILAPLHNPANLAGIEFVQKAHPHIPQIAVFDTAFHATMPSYAYMYALPYELYEKYQIRRYGFHGTSHHYVAKEAAKFLNIAYEEFNAISLHLGNGSSAAAIQNGKSVDTSMGLTPLEGLIMGTRCGDIDPTVVEYTVQCANKSLEEVMKILNHESGLKGICGDNEKHRSQKTKRR*RSQARF*NVRLSH*KVYWGLQW*S*KKVDAILFTGGLGENYSALRESVCEGLENLGIALCKPTNDNPGNGLVNLSQPNTKVQILRIPTDEELEIALQTKKVLEKTE
	42	UN000074	402	TTAATGTCTAAATTGAATATGACCCCAAGAGAAATTGTCGCTTATTTGGATGAATACATCATTGGGCAAAAGGAAGCTAAAAAGTCTATCGCTATCGCTTTTAGGAATCGTTACAGGCGTTTACAACTGGAAAAATCCTTACAAGAAGAAATCACGCCTAAAAACATTTTAATGATTGGTTCTACTGGCGTGGGTAAAACTGAAATCGCAAGAAGAATAGCAAAAATCATGGAACTCCCCTTTGTGAAAGTGGAAGCGAGCAAATACACAGAAGTGGGTTTTGTGGGGCGTGATGTGGAGTCTATGGTAAGGGATTTGGTCAATAACAGCGTGCTTTTAGTGGAAAATGAGCATAAAGAAAAATTAAAAGACAAGATTGAAGAAGCGGTTATAGAAAAA…	134	LMSKLNMTPREIVAYLDEYIIGQKEAKKSIAIAFRNRYRRLQLEKSLQEEITPKNILMIGSTGVGKTEIARRIAKIMELPFVKVEASKYTEVGFVGRDVESMVRDLVNNSVLLVENEHKEKLKDKIEEAVIEKI
	43	UN000075	1224	CGTCGGATTGTAGTAACTGGAATGGGAATGATCAATTCGCTAGGTTTAAATAAAGAAGATTCTTTTTTAGCGATCGCTAAAGGGGAATGCGGTATCAAACACATAGAAAGTTTTGATGCGAGTGCGTTTCCTGTGCGTATTGCTGGAGAAATCACTGACTTTGACCCTACAGAGGTGATGAATCCCAAAGATGTTAAAAAGGCGGGTCGTTTCATTCAATTAGCCTTGAAAGCCACAAGAGAGGCGATGAAAGATAGTGGGATTTTAGACGCTCACAATAGATGCCCTGAAGAATTGGCAAATCGCATGGGCGTAAGCTCTGGCTCTGGAATTGGCGGGTTAGGCAATATTGAAGCGAATTCCATTTTTTGTTTTGAAAAAGGCCCTAGAAAAGTCAAT…	408	RRIVVTGMGMINSLGLNKEDSFLAIAKGECGIKHIESFDASAFPVRIAGEITDFDPTEVMNPKDVKKAGRFIQLALKATREAMKDSGILDAHNRCPEELANRMGVSSGSGIGGLGNIEANSIFCFEKGPRKVNPFFITSALVNMIGGFTSIEFGIKGPNLSSVTACAAGTHAIIEAVKTILLGGADKMLVVGAESTICPVGIGGFASIKALSTRNDEPKKASRPFDKDRNGFVMGEGAGALVLEEYESAKKRGAKIYAEFAGYGESGDANHITAPAPEGEGAFRAMKMALEMAKVEVGYVNAHGTSTHYNDWYESIALKNVFGSKEKVPPVSSTKGQIGHCLGAAGALEAVISIMAMNQGILPPTINQETPDPECDLDYIPNTAREKQVDAVMSNSFGF…
	44	UN000077	771	CAAGAGATTTTTTTATGTTCTATTTCCAATGTGCGCAGTGGGGATTGTAAGGAAGATTGCGCTTATTGCACGCAAAGCTCACACCATCAAGGAGCGATCAAGCGCTATAAATTTAAAGATGAAAAAGTGGTTTTACAAGAGGCTAGAGCGTTAAGGGAATTAGGGGCTTTGGGGTTTTGTCTGGTTACTTCAGGGCGCGAATTAGACGATGAAAAATGCGAATACATCGCTAAATTAGCTAAAGCCATCAACAAAGAAGAATTAGGCTTGCATCTAATCGCATGCTGCGGGCGCGCGGATTTGGAGCAACTAGAGTTTTTAAGAGATGCGGGCATTCATAGTTATAACCACAATTTAGAGACTTCGCAAAATTTCTTCCCTAAAATTTGTTCCACGCAC…	257	QEIFLCSISNVRSGDCKEDCAYCTQSSHHQGAIKRYKFKDEKVVLQEARALRELGALGFCLVTSGRELDDEKCEYIAKLAKAINKEELGLHLIACCGRADLEQLEFLRDAGIHSYNHNLETSQNFFPKICSTHTWEERFITCENALRAGLGLCSGGIFGLNESWEDRIEMLRALASLSPHTTPINFFIKNPVLPIDAETLSADEALECVLLAKEFLPNARLMVAGGREVVFKDNDKQEAKLFEYGINAVVLGDYLTT
	45	UN000079	714	GCTAAAAACAAAATGGCTAAATCCAATTTAAGGTTGGTAGTGAGCATCGCTAAACGATTCACGGGCAGAGGCTTACCCTTCTTGGATTTGATTCAAGAGGGCAATATCGGCTTGATGAAAGCAGTGGATAAGTTTGAGCATGAAAAGGGCTTCAAGTTTTCTACCTATGCGACCTGGTGGATCAAACAAGCTATCAGCAGAGCCATAGCCGATCAAGCCCGCACTATCCGCATCCCCATTCACATGATTGACACGATTAATCGCATCAATAAGGTCATGCGCAAACACATTCAAGAAACCGGCAAAGAGCCTGATTTAGAAGTGGTGGCTGAAGAAGTGGGGCTTTCGTTAGATAAAGTGAAGAATGTGATTAAGGTGACTAAAGAGCCTATCAGTTTG…	238	AKNKMAKSNLRLVVSIAKRFTGRGLPFLDLIQEGNIGLMKAVDKFEHEKGFKFSTYATWWIKQAISRAIADQARTIRIPIHMIDTINRINKVMRKHIQETGKEPDLEVVAEEVGLSLDKVKNVIKVTKEPISLETPVGNDDDGKFGDFVEDKNIVSSIDHIMREDLKAQIESVLDQLNEREKAVIRMRFGLLDDESDRTLEEIGKELNVTRERVRQIESSAIKKLRSPQYGRILRNYL
	46	UN000083	14274	TCTGCTGCTGGAGGATTTTGGCCAGAGAGTCGATCTCACGAGGAGGATCCGCGAGGTGCTGGTGAATTACCCCGAGGGGACGACTGTGCTGAAGGAGCTGATACAGAATGCCGATGATGCTGGCGCGACGAAGGTTTGCTTGTGCTTGGATCGCAGATGGCACGGCGCCAGTTCGTTGCTCTCGGAGAAGCTGGCGCAGTGGCAAGGCCCGGCGCTTCTCGCTTATAACAATGCCGTGTTCACGGAGGAGGATTTCGCCAGCATTTCGAGGATTGGGGACAGTAAGAAGCAAGGGCAAGCTTGGAAGACTGGCCGCTTTGGGGTTGGCTTCAATTCAGTGTACCACCTAACAGATTTGCCATCTTTCGTGAGTGGCAAATATGTAGTCTTGTTTGATCC…	4758	SAAGGFWPESRSHEEDPRGAGELPRGDDCAEGADTECR*CWRDEGLLVLGSQMARRQFVALGEAGAVARPGASRL*QCRVHGGGFRQHFEDWGQ*EARASLEDWPLWGWLQFSVPPNRFAIFREWQICSLV*SSRCISSKCYCSKSWKAS*LC*FFSHLSLQRPVLSILCFWM*HEKAFHWNFISFPFEKWRSSSC**AIKASVLGR*HLFHV*STL*GGCFCDALS*KHHVSRNVHMGH*CKWAAKALFLFHQRTKQRYSLASPGSFETL*IS*TSR**IRFLLP*LLK*GSFWDSFGKED*HLFHSASNGIIIKQNWFFCFCCCQRI*SSSTALGVCCSMRIR*LG*GGCS*TRSGILFSSTAS*NRIDCSSECLL*SFLKPPQHMVWS*HGQGWQT…
	47	UN000084	693	ACTAACAATCAAGTCTTAATTGAAGTGAAAGATCTCCATAGCGCTTTTGGAAGCACCATTATCCATAGGGGCGTGAGTTTTAGCGTGCATAAGGGCGAAGTGATGGCGATTTTAGGGGGTTCAGGGAGCGGTAAAAGCACGCTTTTAAGGTGCATGATCTTGCTCAATCGCCCTACAAAGGGGGAAGTGTTGCTTTTTGGGGAAGATATATGGAAACTCAAAGAAAGAGAGCAGCAAAAGATTTTTAACCGCTGTGGGATTTGCTTCCAGTTTGGGGCGCTCTATAGCTCTTTAACGGTTTTGGAAAATGTGGGCGTGATGCTAGAGCAATACGGCGCTTATTCTAAAAAAATTGTTGAAGAAATTTCTAAAATGTGGATTGAAAGAGTGGGTTTGCCC…	231	TNNQVLIEVKDLHSAFGSTIIHRGVSFSVHKGEVMAILGGSGSGKSTLLRCMILLNRPTKGEVLLFGEDIWKLKEREQQKIFNRCGICFQFGALYSSLTVLENVGVMLEQYGAYSKKIVEEISKMWIERVGLPPRAYHLYPYELSGGMKKRVGIARAMATNPEILFLDEPTSGLDPYSAGKFDELIMTLKESLQLTVVMITHDLDSVHDCVDRFIMLKDGLLEFNGDLKDF
	48	UN000090	4074	ATGTCACAATATTTTTTTCACGTATGTCCAGTTGATGGAAAACAAATAATATCTTTTACATATCCACCCAGTTTATCGATTTTTTTGGAAATGATGCAAAGAAAGATGTCTTTGTGTACGACCGAAAAACTATCCCCCGAAGATCTGTATAATCATTGGGTTTATACCAATGAACAAAAAAGGTACAGCTTGAGCAATGAATTAATAAACCGAATAGAAGTTCTAAACAAGGGATCTCTTACTATGGATGTGCTTGAAAAAAGGACCAGATTTTATAATGATAAAAATAACCAAGAAGATCAGAATAACCATAACCAAGAAGATAAGAATAACCAAGAATGCTTGCCTAGAGTGTATGATCCTTTTTTAAACGGACCATACCGTGGAACAATCAAAAAA…	1358	MSQYFFHVCPVDGKQIISFTYPPSLSIFLEMMQRKMSLCTTEKLSPEDLYNHWVYTNEQKRYSLSNELINRIEVLNKGSLTMDVLEKRTRFYNDKNNQEDQNNHNQEDKNNQECLPRVYDPFLNGPYRGTIKKVYSRSMVDDSITSTEDSIGMVWINKIHDMLPTDYQKLEHKMDIFNGESLSTDIGPFLTSISELARKSTTGFSLNFKKLVLISEQRRFDSENKTKCLKFLFDVITTDPNNQTIQNKSIGIEEIGKKIPRRSYKLIDSFEEREEENEEESTENHGIRSRKAKRVVIYTDKADPDQNTNTHTSTSTNSDQAEELALIRYSQQSDFRRDIVKGSMRAQRRKIVTWEMFQANVHSLLFLDRIDKTFFFSFDISRTMNLIFRNWIDTGPKLK…
	49	UN000092	777	AACGCTCTTTCAAAGGTTTTTGGCTCTGTGGCTGGCTATAAATTCCCTTCTTTTATCCAAAAAGGTATCAACGCTCTTTATGTTAAGATCTTTAAAATTGATTTGAGCGAGTTTGAGCCTTTGGAAAATTACAAGAGTTTGAACGCCCTTTTCACGCGCTCCTTAAAAAAAGAACGCCCCTTTGACAAAGCCCCTAATATTTGCATTGCACCTTGCGATGCTTTAATCACTGAATGCGCTTTTTTAGACAACGATACCGCTTTGCAGATTAAAGGCATGCCCTATAAAGCGCATGAATTAGTGGGCGAAATCAACCCCTTAAGCCCCTCTTTTTTTTATGCGAATTTTTACCTTTCGCCCAAAGATTACCACCACTACCATTCTCCTTGCGATTTAGAA…	259	NALSKVFGSVAGYKFPSFIQKGINALYVKIFKIDLSEFEPLENYKSLNALFTRSLKKERPFDKAPNICIAPCDALITECAFLDNDTALQIKGMPYKAHELVGEINPLSPSFFYANFYLSPKDYHHYHSPCDLEILEARYFAGKLLPVNKPSLYKNNNLFVGNERVVLVAKDIQGNRLYFVAVGALNVGKMRFNFDKNIQTNAKARFTQTYSYNPPIKVKKGDNLGNFEMGSTIVLFIQNTAFKDLKEKSVKFGESIGEF
	50	UN000093	684	TTGATCGCTTTAGCGTTAGCCACTTCTCTTATAGGCGCTGAAAACACCAAATGGGATTATAAAAATAAAGAAAATGGCCCGCACCGCTGGGACAAATTGCACAAAGATTTTGAAGTGTGCAAAAGCGGTAAAAGCCAATCGCCCATCAACATTGAGCATTACTACCACACGCAAGATAAAGCCGATTTGCAATTCAAATACGCCGCTTCTAAGCCTAAAGCGGTCTTTTTCACCCACCACACTTTAAAAGCTTCGTTTGAGCCGACTAACCACATCAATTATAGAGGGCATGATTATGTGCTGGATAATGTGCATTTCCACGCCCCTATGGAATTTTTAATCAATAATAAAACCAGGCCTTTGAGCGCGCATTTCGTGCATAAAGACGCTAAAGGGCGC…	228	LIALALATSLIGAENTKWDYKNKENGPHRWDKLHKDFEVCKSGKSQSPINIEHYYHTQDKADLQFKYAASKPKAVFFTHHTLKASFEPTNHINYRGHDYVLDNVHFHAPMEFLINNKTRPLSAHFVHKDAKGRLLVLAIGFEEGKENPNLDPILEGIQKKQNFKEVALDAFLPKSINYYHFNGSLTAPPCTEGVAWFVIEEPLEVSAKQLAEIKKRMKNSPNQRPVQP
	51	UN000095	13098	ATGTTGGAAGATCAAGTCGCCTATCTTTTACAGAAATACCTTGGCAACTATGTCAAAGGACTCAGCAAGGAAGCTCTCAAGATCAGCGCCTGGAGAGGAGATGTAGAGTTGACAAATATGCAGTTGAAACCAGAGGCACTCAATGCCTTAAAACTGCCCGTTAAAGTCAAAGCAGGATTTCTTGGATCAGTAAAGATTAAGGTTCCATGGAGCAGGCTGGGACAGGAACCTGTTTTGGTTTACTTAGATCGAATTTTCATTTTAGTTGAGCCAGCAACCCAGGTTGAAGGATGTACTGAGGATAGTGTTCAAATGGCTAAGAAGATAAGAATACGGGAAATGGAAATGAGGCTGTTAGAAAGTAGGCAACAACTAAAATCTGAAATGAACACATCATGG…	4366	MLEDQVAYLLQKYLGNYVKGLSKEALKISAWRGDVELTNMQLKPEALNALKLPVKVKAGFLGSVKIKVPWSRLGQEPVLVYLDRIFILVEPATQVEGCTEDSVQMAKKIRIREMEMRLLESRQQLKSEMNTSWLGSLINTIIGNLKLSITNIHIRYEDLESNPGHPFAAGITLARLSAVTIDDSGKETFITGGSLDRIQKSVELERLALYLDSDISPWNVGKPWEDLLPSEWSEVFEVESKSGEPAKTLPKEHCYILQPVTGNAKYAKMRPDESRSMGQPLQKAAVNLDDVTLCLSKDGYRDILKLADNFNAFNQRLKYAHYRPPVSVKSNPGLWWKYAYKAVSDQMKAASGKLSWEQVLRYARIRKRYISLYATLLKSDVNRLVVDDNKEIEELDGEL…
	52	UN000098	11658	ATGAGCCCAATTCAGAACATCGAACAGCATTCTCAGCGCCTTCTGGATCCAAATCTCCAGCTTCAGGTGCGGCACCAGATGGCGATGGAGGTCCGAGACAGCCTGGAGATCACTCACACATCAGAGTATCTGCACTTCCTCAAATGCTACTTCCGCACCTTCTCCACGATCCTGGTGCAGATGACGACGCCGCAGCTCTGCGACAACACGGAGCACAAGCTCCGCAACGTGATTGTGGAGATCCTCAATCGCCTCCCCCACAGCGAGGTCCTCCGCCCCTTCGTACAGGAGCTCCTCAAGGTCGCCATGACCGTCCTCACCGCAGACAACGAGGAGAACGGCCTCATCTGCATCAGAATCATCTTCGACCTCCTACGCAACTTCCGCCCCAGCCTTGAG…	3886	MSPIQNIEQHSQRLLDPNLQLQVRHQMAMEVRDSLEITHTSEYLHFLKCYFRTFSTILVQMTTPQLCDNTEHKLRNVIVEILNRLPHSEVLRPFVQELLKVAMTVLTADNEENGLICIRIIFDLLRNFRPSLEADVQPFLDFVCRIYQNFRATVAYFFESNAACGGGDGGGGEDCXSQGYYLMVLGSQRVCSLIRVLGRLRL*RRVRLL*CSCFSSMGALCRPISPICCL*WSWRYLYQGLKRSLLSQRTTSLS*RVRRLRLCRF*LTCSRVLRTTLGHMKKAYAKAL*ICSLLARTLYRFGRNC**P*SMFWGQISSVVYSP*LTHYWKKGFSWGLAGRVLRH*GLWRIAFLLRLFIMFDWTSHFRSCQELYICSPETCTTRHCP*AFTLLAPA*C*I…
	53	UN000100	1791	ATTAGAAATATCGCTGTAATCGCGCATGTTGATCATGGGAAAACCACTTTAGTGGATGGCTTACTTTCTCAATCTGGCACATTTAGTGAGAGGGAAAAAGTGGATGAAAGGGTGATGGATAGCAATGACTTAGAAAGAGAAAGAGGGATCACTATCCTGTCTAAAAACACCGCTATTTATTACAAAGACACTAAAATCAATATCATTGACACTCCCGGGCATGCTGATTTTGGGGGCGAAGTGGAGCGCGTTTTAAAAATGGTGGATGGGGTGTTGCTTTTAGTGGACGCTCAAGAAGGGGTCATGCCTCAAACTAAATTCGTGGTTAAAAAGGCTTTGAGTTTTGGGATTTGCCCTATTGTGGTGGTGAATAAAATTGATAAGCCTGCCGCTGAACCG…	597	IRNIAVIAHVDHGKTTLVDGLLSQSGTFSEREKVDERVMDSNDLERERGITILSKNTAIYYKDTKINIIDTPGHADFGGEVERVLKMVDGVLLLVDAQEGVMPQTKFVVKKALSFGICPIVVVNKIDKPAAEPDRVVDEVFDLFVAMGASDKQLDFPVVYAAARDGYAMKSLDDEKKNLEPLFETILEHVPSPSGSVDEPLQMQIFTLDYDNYVGKIGIARVFNGSVKKNESVLLMKSDGSKENGRITNLIGFLGLARTEIENAYAGDIVAIAGFNAMDVGDSVVDPNNPMPLDPMHLEEPTMSVYFAVNDSPLAGLEGKHVTANKLKDRLLKEMQTNIAMKCEEMGEGKFKVSGRGELQITILAENLRREGFEFSISRPEVIIKEENGVKCEPFEHLV…
	54	UN000101	2385	GATCGTTTAGTCAATGAAACAAAAAATATTGTAGAAGTGGGGATTGATTCTTCTATTGAAGAGAGCTATTTAGCCTATTCCATGAGCGTGATCATAGGGCGCGCTTTACCGGACGCTAGAGATGGCTTAAAGCCTGTGCATAGGCGTATTTTGTATGCGATGCATGAATTAGGCCTTACTTCCAAAGTCGCTTACAAAAAAAGCGCTAGGATCGTGGGTGATGTGATTGGTAAATACCACCCCCATGGCGATAACGCGGTTTATGATGCGTTAGTGAGAATGGCGCAAGATTTTTCTATGCGTTTGGAATTAGTGGATGGGCAGGGTAACTTTGGCTCTATTGATGGCGATAACGCTGCGGCGATGCGTTACACTGAAGCCAGAATGACTAAGGCGAGT…	795	DRLVNETKNIVEVGIDSSIEESYLAYSMSVIIGRALPDARDGLKPVHRRILYAMHELGLTSKVAYKKSARIVGDVIGKYHPHGDNAVYDALVRMAQDFSMRLELVDGQGNFGSIDGDNAAAMRYTEARMTKASEEILRDIDKDTIDFVPNYDDTLKEPDILPSRLPNLLVNGANGIAVGMATSIPPHRIDEIIDALAHVLENPNAELDEILEFVKGPDFPTGGIIYGKAGIIEAYKTGRGRVKVRAKVHVEKTKNKEIIVLDEMPFQTNKAKLVEQISDLAREKQIEGISEVRDESDREGIRVVIELKRDAMSEIVLNHLYKLTTMETTFSIILLAIYNKEPKIFTLLELLRLFLNHRKTIIIRRTIFELEKAKARAHILEGYLIALDNIDEIVQLIKT…
	55	UN000103	11454	TGAAGCAGAAAAGACGGAGGGTATTGGAAGTGCCTCCAAGAATAAAGTCTTTTATCAACAGTGTTACTGCTGTTCCACTTGAGAATATAGAAGAACCCCTCAAAGGTTTCTTCTGGGAGTATGATAAGGGTGATTTCCACCACTGGGTCGATCTTTTTAACCATTTCGATTCATTCTTTGAGAAGCACATAAAACCAAGGAAGGATCTGCAACTTGAGGATAATTTTCTAGAAGCTGATTCTTCTTTTCCCCGAGGAGCAGTTCTGCAAATTCTTCGTGTTATAAGGATCATATTGGATAATTGTACAAACAAGCACTTCTATAGTTCTTATGAACAGCACCTTTCAGCTCTTCTTGCTTCTACTGATGCCGATGTTGTTGAGGCTAGCCTGCAGACTT…	3818	*SRKDGGYWKCLQE*SLLSTVLLLFHLRI*KNPSKVSSGSMIRVISTTGSIFLTISIHSLRST*NQGRICNLRIIF*KLILLFPEEQFCKFFVL*GSYWIIVQTSTSIVLMNSTFQLFLLLLMPMLLRLACRLWLHF*RKHLESALYEMLLSIRNCLHFHKVGAARRKVLG**HAR*RMVVIQLLMN*VAPSILSFMLLMTHQRRSLVQSNLIKGYKLSICLTLTLDRKAILSC*TS*CQNTKYLLV*GSHF*QDCVLQGLLLH*LQGSSTFVFGYMPLLFLFKLVMMLMTWLLFLTMSLSLSMN*YAC*VMKMQFLKRSAFWAFCLWLLYPKIDLASQQY*LL*LLVGTVVSYQVLCRRQ*IQLQVVLLDGLLFLPRRSCPLLPS*FHHLLVAQLSEK…
	56	UN000105	1137	TCCTCTAAAATCCAATCCCTTTCAGAATCCACAACGATCGCTATCAGCACGCTCGCTAAAGAATTGAAATCGCAAGGAAAAGATATTTTAAGTTTTTCAGCGGGCGAGCCTGATTTTGACACCCCGCAAGCGATTAAAGATGCGGCTATAAAAGCCCTAAACGAAGGCTTCACCAAATACACGCCGGTGGCCGGGATTCCGGAATTATTAAAAGCGATCGCTTTTAAATTGAAAAAAGAAAACAACTTGGATTATGAGCTGAGTGAAATTTTAGTGAGTAATGGCGCTAAGCAAAGCTTGTTCAATGCGATTCAAGCTTTAATAGAAAAGGGCGATGAGGTGATTATCCCTGTGCCTTTTTGGGTAACTTACCCTGAGCTTGTGAAATACAGCGGAGGG…	379	SSKIQSLSESTTIAISTLAKELKSQGKDILSFSAGEPDFDTPQAIKDAAIKALNEGFTKYTPVAGIPELLKAIAFKLKKENNLDYELSEILVSNGAKQSLFNAIQALIEKGDEVIIPVPFWVTYPELVKYSGGVSQFIQTDEKSHFKITPKQLKDVLSPKTKMLILTTPSNPTGMLYSKAELEALGEVLKDTKVWVLSDEIYEKLVYKGEFVSCAAVSEEMNKRTITINGLSKSVAMTGWRMGYAASKDKKLVKLMNNLQSQCTSNINSITQMASIVALEGLVDKEIETMRQAFEKRCDLAHEKINAIEGLSALKPDGAFYLFINIGSLCGGDSMRFCHELLEKEGVALVPGKAFGLEGYVRLSFACSEEQIEKGIERI
	57	UN000106	1185	ATGTCGTTTATGCAAAACGTTAAAAACATTCAAGAGGTGGATGTCAATCATAAAAGGGTGCTTATTAGAGTGGATTTTAATGTGCCTTTAGATGAAAATTTGAATATCACTGATGACACGCGCATCAGAGAGAGCTTGCCTACCATCCAATTTTGTATTGACAATAAGGCTAAAGATATTATTTTAGTGAGCCATTTGGGCCGCCCTAAAGGGGTTGAAGAAAAATTGAGCTTGAAACCCTTTTTAAAACGCCTTGAAAGACTCTTAAATCATGAGGTGGTTTTTTCTCAAAATATCGCGCAACTCAAGCAAGCCTTAAACGAAAACGCACCCACAAGGATTTTTCTTTTAGAAAACATCCGTTTTTTAAAAGGCGAAGAAGAAAATGATGAAAATCTG…	395	MSFMQNVKNIQEVDVNHKRVLIRVDFNVPLDENLNITDDTRIRESLPTIQFCIDNKAKDIILVSHLGRPKGVEEKLSLKPFLKRLERLLNHEVVFSQNIAQLKQALNENAPTRIFLLENIRFLKGEEENDENLAKDLASLCDVFVNDAFGTSHRKHASTYGTARFAPVKVSGFLLKKEIDSFYQAFNHPLRPLLLIVGGAKVSSKLTLLKNILDLIDKLIIAGAMSNTFLKALGYDVQDSSVEDALINDALELLQSAKEKKVKVYLPIDAVTTDDILNPKHIKISPVQDIEPKHKIADIGPASLKLFSEVIESAPTILWNGPLGVHEKQEFARGTTFLAHKIANTYAFSLIGGGDTIDAINRAGEKDNMSFISTGGGASLELLEGKILPCFEVLD
	58	UN000107	126	GGTTGCGAACCGGATGGTACACTACTTGGTTTTGGAAGATATGGCACCAAAAGTTGTAGAGCTGTTCCTCTTTCATACCGAGCCATTGAAGCAGCGCGTCGAGCTACAATCGGACAATTCCATCGC	42	GCEPDGTLLGFGRYGTKSCRAVPLSYRAIEAARRATIGQFHR
	59	UN000108	1524	ATGGGTTTGCCTTGGTATCGTGTTCATACCGTCGTATTGAATGATCCCGGTCGGCTGCTTTCTGTCCATATAATGCATACAGCTCTAGTTTCCGGTTGGGCCGGTTCGATGGCTCTATACGAATTAGCAGTTTTTGATCCTTCTGACCCCGTTCTTGATCCAATGTGGAGACAGGGTATGTTCGTTATACCCTTCATGACTCGTTTAGGAATAAACAATTCATGGGGCGGTTGGAGTATTACAGGAGGAACTATAACGAATCCGGGTATTTGGAGTTACGAAGGTGTGGCCGGGGCACATATTGTGTTTTCTGGCTTGTGCTTCTTAGCAGCTATCTGGCATTGGGTGTATTGGGACCTAGAAATATTCTGTGATGAACGTACGGGAAAACCCTCTTTG…	508	MGLPWYRVHTVVLNDPGRLLSVHIMHTALVSGWAGSMALYELAVFDPSDPVLDPMWRQGMFVIPFMTRLGINNSWGGWSITGGTITNPGIWSYEGVAGAHIVFSGLCFLAAIWHWVYWDLEIFCDERTGKPSLDLPKIFGIHLFLSGVACFGFGAFHVTGLYGPGIWVSDPYGLTGKVQSVNPAWGAEGFDPFVPGGIASHHIAAGTLGILAGLFHLSVRPPQRLYKGLRMGNIETVLSSSIAAVFFAAFVVAGTMWYGSATTPIELFGPTRYQWDQGYFQQEIYRRVGASLAENLSLSEAWSKIPEKLAFYDYIGNNPAKGGLFRAGSMDNGDGIAVGWLGHPIFRDKEGHELFVRRMPTFFETFPVVLVDGDGIVRADVPFRRAESKYSVEQVGVTV…
	60	UN000109	10749	ATGAAATGGGCTTCATTGCTTAAGGACATCAAAGAGAAGGTCGGTTTCTCTCAGTCCTCTCCCTTAACGTCTCCCACCTCTACTGCTTCCGCTTCTGTTGAATCCTCACCGTCCGATCGGCATGCTTTCGCGCCATCACCATCAAGGGACAAGCATGAATTGGAGTTGGACTTCAAGAGATTTTGGGAAGAATTTCGCTCTTCGAGTTCCGAAAAGGAGAAAGAAGCGGCCTTAAACATGGCTGTCGATGTTTTCTGTAGACTAGTGAAGCAGCAGGCTAATGTAGCTCATTTAGTTACTACGTTAGTTGAAGCACATATATTCTCTTTTGTGGTGGGAAGAGCTTTTGTAACAGATGTTGAGAAGTTGAAAATTTCTAGCGGGACAAGATCTTTGCAT…	3583	MKWASLLKDIKEKVGFSQSSPLTSPTSTASASVESSPSDRHAFAPSPSRDKHELELDFKRFWEEFRSSSSEKEKEAALNMAVDVFCRLVKQQANVAHLVTTLVEAHIFSFVVGRAFVTDVEKLKISSGTRSLHVVEVVNFFSEVAKDGTSPGSNLLYAVEVLVTGPIDKQPLLDSGILCCLIHILNALLAPDDANKRQPTVYSEGSISSKKGYDGDATQARRLEVEGSIVHIMKALSSHPSAAQSLIEDDSLLILFQIVATGSLTVFSRFKAGLVPLHTIQLHRHAMQIIGLLLVNDNGSTAKYIHKHHLVKILLMAVKDFNPESGDSAYTMGIVDLLLECVELSYRPEAGSIRLREDIHNAHGYQFLVQFALSLQKNQSTKCLYSHPSEQNSSSVGSN…
	61	UN000111	11214	CGACTCGCCGCACTCAACTCACTCCACCGAGCGATTCTCTACCCACCCAACTCGCTCCTCGTCTCCCACTCCTCCTCTTTCCTCTCTCAAGGCCTCTCACAGCTCCTCTCCGACAAGTCATTCTCTGTGAGGCAGTTGGCAGCAACTGCGTACGGAGCTCTTTGTTCTGTAGTGTGTTCAAGCCCATTAGCATCAAATGGACGACAAAATCATGCTATTACTGGAGCGGTGGTAGATCGATTTATCAGCTGGGCTTTGCCGCTGATTAGGGATGTTACTGTTGGAAATGGGGCAGCTGAATTGGCATTGGCAGGCCTCCGTGAATTTCTCAATATTGGAGACACAAGCAGACTTGAAGTTTATGTTTTGCCTATTCTCGAAGCATGCAAGGAACTTCTT…	3738	RLAALNSLHRAILYPPNSLLVSHSSSFLSQGLSQLLSDKSFSVRQLAATAYGALCSVVCSSPLASNGRQNHAITGAVVDRFISWALPLIRDVTVGNGAAELALAGLREFLNIGDTSRLEVYVLPILEACKELLEDERTSLNLLHQLLGILTLISVKFGQCFLPHFIDIVDLLLGWALVPDLSESDRSTIMDSFLQFQKHWLSNLQFSLGLLSKFLGDMEALVQDSSVGTPQQFRRLLALLSCFLTVLQVTASGMLEMNLLEQISEPLLKMLPQLLVCLSTVGKKFGWSKWAKESLRCLILLAEISCEKFSTFYLMAVEILFHSLSEDSSTSGLGFGKIPSFQVHGVLKANMQLLSLQKLGLLPSSVKKILQFSSPLSQLRLHPNHLVAGSSAATYLFLL…
	62	UN000113	1146	TTTGGGGAGTTTGGAGGGAGTTTTGTTTCAGAATTGTTAGTGCCTGCATTAAGAGAGTTAGAACAGGCGTTTGATGCGTGTTTGAAAGATGAAAAATTCCAAAAAGAATATTTTCGTCTTTTAAAAGATTTTGTGGGCCGTCCTAGCCCTTTAACCTTGTGTCAAAATATCGTTTCTAACCCTAAAGTTAAGCTTTATTTAAAACGAGAAGATTTAATCCATGGCGGGGCACACAAGACTAATCAAGCCTTAGGGCAAGCCCTTTTAGCGAAAAAAATGGGCAAAACAAGGATTATTGCTGAAACAGGTGCTGGGCAGCATGGCGTGGCGACGGCTATCGCTTGCGCGTTATTGAACTTAAAATGCGTGATTTTTATGGGAGAAAAAGACATCAAGCGC…	382	FGEFGGSFVSELLVPALRELEQAFDACLKDEKFQKEYFRLLKDFVGRPSPLTLCQNIVSNPKVKLYLKREDLIHGGAHKTNQALGQALLAKKMGKTRIIAETGAGQHGVATAIACALLNLKCVIFMGEKDIKRQEMNVFRMRLLGAEVREVNSGSATLKDAVNEALRDWASSYKDTHYLLGTAAGPHPYPTMVKTFQKMIGDEVKSQILEKENRLPDYVIACVGGGSNAIGIFSAFLNDKEVKLIGVEPAGLGLETNKHGATLNKGRVGILHGNKTYLLQDDEGQIAESHSISAGLDYPGVGPEHSYLKESGRAVYESASDAEALEAFSLLCQKEGIIPALESSHALVYALKLAQKCEEESIIVVNLSGRGDKDLNTVYNAL
	63	UN000114	768	TTGGGAATGGAGAGGGGAAAGATAGCATGTCACAAGAGCGAGGCGAGGGGGAGATTCCCTACTGCGAGAGGGACGCCTCGCGCGCCGGGCTTCTAGAGATGAGGCCTTTTGGCGAAGCCAAGTCAATTTCGGGCCACCAAACCCTGCAACTGATGAGAAGGACCGGGGAAGCGTGTACGTTGTCACACTCCCTGCCTTCCAAAGGTGCCTAGAGGACGGGCCAGACGCAGACCCGGGAGCGGATTCCCCACCGGCAGGGGGACAGGAGACGGCCATCTCGAGGCACATCACGACCTACAGGCAACACCGGCGAGACCCGGGAAGGCAACCCGATTGGGAGTCAGAGGATCCATAGTACCTGCAGCCTCCCGGACTTCATATTAATATTTTTGAATGCGG…	256	LGMERGKIACHKSEARGRFPTARGTPRAPGF*R*GLLAKPSQFRATKPCN**EGPGKRVRCHTPCLPKVPRGRARRRPGSGFPTGRGTGDGHLEAHHDLQATPARPGKATRLGVRGSIVPAASRTSY*YF*MRG*GISFLQRKKSGADFTRRNLTIHPIPMICA*NALLDLCSRKLYRQQRTRFDPGLPFHYFFHDEGTASASVEVAERPPESKGELLHLSPRDTIRYLNRLKESEEAATLPAQPTGKPLISPISR
	64	UN000116	10443	TCAAAATACCTCATCCAAAATATCCATCAACTCGGATTTCGGTTCAAGTACCTAGTCTGGCAGTTCATCTCTCTCCAGAGAGGTATCGCAGAGTCATGGATCTGCTAGCTATACTCAATAACGCACAGGAAAGTAGTGACTTGGGATCTAATAAATTTTCCCAAACTGGTGTCCCATCTTGGTATCCTGCAGATCTTGCCACGAATGCTAGGCTTCTTGTTTGGAGGGGAATTGGTAATTCTGTTGCTGAATGGAAGTCCTGTTTTCTTGTGTTATCTGGATTATACCTATATGTTTTAGACTCTGAAGTATCTCAAACCCATCAACGATGTTCAAGCATGGCTGGTCGTCAAGTTTTCGAAGTTTCCCCTGCAAGTGTTGGTGGGTCACTGTTTTCAG…	3481	SKYLIQNIHQLGFRFKYLVWQFISLQRGIAESWIC*LYSITHRKVVTWDLINFPKLVSHLGILQILPRMLGFLFGGELVILLLNGSPVFLCYLDYTYMF*TLKYLKPINDVQAWLVVKFSKFPLQVLVGHCFQLQCVLGAWIFRRLWSLLTL*L*SFKRKRSLCG*KGLPKQLTELLLLHPSIF*KNRVVIPLNLEGLGLIIKQQTLLSMEHC*KQSF*YMEKQQREHVKPLKRH*SWSSLLEEGRLTLSV*EAS*L*R*KCIPLRSKMNFKVFCLRLPNI*PVPL*RMEKTFVLLPMIPLGLNFLKQF*RRMIFSMMHCLTSRPLLIIVFIHKVVRCLLVASIVLIHWSTVQVLIPLMVHHTAKN*KKGRT*AVRYFTRHKILTHLILSPLPF*HDIL…
	65	UN000117	198	CTTTCCTTCCGTTCTGCGAGAGTAGGCACCAAAAGCTGTCCTATCATTTATTGGAGTGGAAGGCGCTGCTTCCCATCCTCATTCCGAAACAAAGAGAGTAAGGCCACTTGTGACGTATCTTATTGGTCCAACCCCTACTTTAAGAGGAAAGCAAAAATCCCCTTTTCGTTTAGCCGATATCTCTTGAAGTATTTGTTT	66	LSFRSARVGTKSCPIIYWSGRRCFPSSFRNKESKATCDVSYWSNPYFKRKAKIPFSFSRYLLKYLF
	66	UN000118	3882	ATGGAGGGAATCTGCCAGTCAGCTAATAGTAGTGGTGATGCTGCTCAGTCCTGCAGTATTGGTGGGACCACTTGCCAGGATAATAATTATTCTGGATATCCTCAAGCTGTCGCTGTGAATGGATGGATGTATTATAATGAATGTAGCCAATTGTGTGGGCCATATATTCAGGAACAGTTATATGAAGGCTTATCCACTGGATTCTTGCCAGAGGAGCTTCTTGTATATCCTGTTGTAAATGGGAGTCTTTTGAATCCTGTACCCTTGAAATACTTTAAGGAGTTCCCTGACCATGTTGCTACGGGCTTTTTATATTGGTCTGCTGGCTATCCAACCACAGAACCGAGTGGCGACAGTAAACCTGCAGATTGTTTTCTTTCTAGCAATATAAACTCAGCA…	1294	MEGICQSANSSGDAAQSCSIGGTTCQDNNYSGYPQAVAVNGWMYYNECSQLCGPYIQEQLYEGLSTGFLPEELLVYPVVNGSLLNPVPLKYFKEFPDHVATGFLYWSAGYPTTEPSGDSKPADCFLSSNINSACGPCNQGDHIDDSAPSSDSKAQVETQAQVEPQSWVMCNTFGPELQHGNAGAINQTLSTPFMSSEESCWLFEDEEGRKHGPHSLAELYSWHRSGCIHESLMIYHVDNRIGPFTLVSIINGWSTDEWSVSAEMENKCNDSNSLLSFIAGISDEVCVQLHSGIMKAARRVLLDEIFSSIIPEFVSLKRAQRHLKPEPVSQAVKSCSLVDKRVELVKKKKKYAASDNAIAVTIHAFDQPVSMHETSMESLSCANSSCTKPQRFKKMTNQP…
	67	UN000122	1710	CGAAGTCATTTCTGCACAGAAATTAGTGAAAAAGATGTGGGTAAAATCATCAAAGTGGCCGGGTGGTGTAACACTTATAGAGACCATGGAGGCGTGATTTTTATTGATTTAAGGGATAAAAGCGGTTTAGTGCAACTCGTCTGTGATCCTAGCTCTAAGGCTTATGAAAAGGCTTTAGAGGTTAGGAGCGAATTTGTGCTAGTGGCTAAAGGGAAAGCGCGTTTAAGGGGCGCTGGGTTAGAAAACCCTAAACTAAAGACCGGTAAAATTGAAATCGTTTTAGAAGAGTTAGTCATTGAAAACAAAAGCGCTACCCCACCGATTGAAATTGGCAACAAACATGTGAATGAGGATTTGCGCTTGAAATACCGCTATTTGGATTTGCGCTCTTTGAGTGCT…	570	RSHFCTEISEKDVGKIIKVAGWCNTYRDHGGVIFIDLRDKSGLVQLVCDPSSKAYEKALEVRSEFVLVAKGKARLRGAGLENPKLKTGKIEIVLEELVIENKSATPPIEIGNKHVNEDLRLKYRYLDLRSLSAYEIFKLRSEVALITRNALAQKGFLEIETPILSKTTPEGARDYLVPSRVHEGEFFALPQSPQLFKQLLMVGGMDRYFQIARCFRDEDLRADRQPEFTQIDAEMSFCNENDVMGVVEDLLQAIFKAIGHEISKPFKRMPYKEAMENYGSDKPDLRFELPLIEVGDCFRDSSNAIFSNIAQDPKNKRIKALNVKGADVIFSRSVLKELEEFVRQFGAKGLAYLQIKEDEIKGPLVKFLSEKGLKNILERTNAQVGDIVFFGAGDKKIVL…
	68	UN000125	1767	GAAGGAGCAGTAGCCGACGCTGAAACGAATGTGCCTGCTGGCAATCTCCCATCCGAGTTCTTCATGAGCAAGAAAATTACCAACAAACTTCAACAGCAAATACAGGACCCATTAGTGTTGGCAAGCAATGCTTTGCCGAATTGGTGTGAAGATCTCAATCAAGCTTGCCCTTTCCTGTTTCCGTTCGAAACACGCCAGCTGTATTTTAACTGTACCGCATTTGGTGCATCGCGTAGTATTGTTTGTCTTCAGTCGCAACGTGATGTGACTTTGGAGCGACAACGTATGCCTGGACTAAGCCCAAGGCGTGATGATCAGCACGAATTCCGTGTCGGTCGGTTGAAGCATGAGCGTGTTAAGGTGCCCCGCAATGAGAATTTACTTGAGTGGGCCATGCAA…	589	EGAVADAETNVPAGNLPSEFFMSKKITNKLQQQIQDPLVLASNALPNWCEDLNQACPFLFPFETRQLYFNCTAFGASRSIVCLQSQRDVTLERQRMPGLSPRRDDQHEFRVGRLKHERVKVPRNENLLEWAMQVMKVHCNRKSVLEVEFVGEEGTGLGPTLEFFALVAAELQRTDLCMWLCDDANQEMHDKNSEQNKHLIASDDIKPVGYYVNRRENGLFPAPLPQNSEMCDRVSKYFWFLGVFLAKVLQDMRLVDLPLSDSFLKLLCHNKVLSRGVHQIQSNPASEDLMTSSVVSEDSELAETCSKLLAGVGISSTTEYNTTNCWYDGILTHDNLAEIDPIRYEFIKELQELVARKQAVESDASLTPDQRREQLEALKLRTKQNEEIDLEDLALTFTY…
	69	UN000128	1383	ATGTTCATTTATGATACCAAATTAAAACAAAAAGTCCCTTTTGAGCCTTTAATCCAAAATAAGGCGAATATTTATGTGTGCGGGCCTACGGTGTATGATGACGCTCATTTAGGGCATGCCAGGAGCGCGATTGCTTTTGATTTGTTAAGGCGCACGCTTGAATTGAGCGGCTATGAAGTGGTGTTAGTAAGGAATTTCACGGATATTGACGATAAAATCATCAACAAAGCCCTAAAAGAAAACAAAAGCATTCAAGAATTAAGCAGCATTTATATTGAATCTTACACGAGGGATTTGAACGCTTTGAACGTGAAACAACCCAGCCTAGAGCCTAAAGCGAGCGAGTATTTAGACGCTATGGTGCACATGATTGAAACGCTTTTAGAAAAAAATTTCGCT…	461	MFIYDTKLKQKVPFEPLIQNKANIYVCGPTVYDDAHLGHARSAIAFDLLRRTLELSGYEVVLVRNFTDIDDKIINKALKENKSIQELSSIYIESYTRDLNALNVKQPSLEPKASEYLDAMVHMIETLLEKNFAYRVSNGDIYLDTSKDKDYGSLSMHNSSVEFSRIGLVQEKRLEQDFVLWKSYKGDNDVGFDSPLGKGRPGWHIECSSMVFETLALANAPYQIDIHAGGADLLFPHHENEACQTRCAFGVEIAKYWMHNGFVNINNEKMSKSLGNSFFIKDALKNYDGEILRNYLLGVHYRSVLNFNEEDLLMSKKRLDKIYRLKQRVLGTLGGINPNFKKEILECMQDDLNVSKALSVLESMLSSTNEKLDQNPKNKALKGEILANLKFIEELLGIG…
	70	UN000129	645	ATGTTTGGTTGCAAATCTGTTGCTACTCCTCTTGTAGCAAATGAAAAATGGATGAAAGAAGATGGAGAAAAGAAGGTGAATGCCTCTTTATATCGAAGTTTGGTTGGAAGTCTTTTGTACCTAACTGCTACGAGGCCCGACATCATGTTTGCAGCAAGTTTCTTATCCAGATTTATGCAAAGCCCAAGCCAAATTCATTTTGGAGCAGCAAAAAGAGTATGAAGATACTTGCAAGGGACTATTGGCTATGGAATTTGGTACAACTACTCTTCAGACTTGAAGTTGGTTGGATATAGTGATAGCGATTGGGCTGGATCGGCTGATGATATGAGAAGTGCATCTGGTTATGCATTTTTTCTCGGGTCAGGTGTATTCTCATGGGCCTCCAAGAAGCAACAA…	215	MFGCKSVATPLVANEKWMKEDGEKKVNASLYRSLVGSLLYLTATRPDIMFAASFLSRFMQSPSQIHFGAAKRV*RYLQGTIGYGIWYNYSSDLKLVGYSDSDWAGSADDMRSASGYAFFLGSGVFSWASKKQQTVAQSSAEAEYVAALMATSQAIWLRRIF*DVGQSQEEGTERFCDNKSAIAIGKNPVCHNRTKHIAIKYHFIREAIENGEIQL
	71	UN000131	1803	TCAATGAAGCACCTTATTATCGTAGAATCCCCCGCAAAAGCCAAAACCATTAAAAATTTTTTGGATAAAAATTATGAAGTCATTGCCTCTAAAGGGCATGTTAGGGATTTATCCAAATTCGCTTTAGGCATTAAGATTGATGAAACCGGCTTTACCCCTAATTATGTCGTGGATAAAGATCATAAAGAGCTTGTCAAACAAATCATAGAGCTTTCTAAAAAGGCATCTATTACTTATATCGCTACCGATGAGGATAGAGAGGGGGAAGCGATAGGCTATCATGTGGCATGTTTGATTGGGGGGAAATTGGAGAGCTATCCTAGGATTGTTTTTCATGAGATCACGCAAAATGCGATTTTAAACGCTTTAAAAACCCCACGACAAATTGACATGTCTAAG…	601	SMKHLIIVESPAKAKTIKNFLDKNYEVIASKGHVRDLSKFALGIKIDETGFTPNYVVDKDHKELVKQIIELSKKASITYIATDEDREGEAIGYHVACLIGGKLESYPRIVFHEITQNAILNALKTPRQIDMSKVNAQQARRFLDRIVGFKLSSLISSKITKGLSAGRVQSAALKLVIDREREIKAFKPLTYFTLDAYFEPDLEAQLISYKGNKLKAQELIDEKKAQEIKNELEKESYAISSIVKKSKKSPTPPPFMTSTLQQSASSLLGFSPTKTMSIAQKLYEGVATPQGVMGVITYMRTDSLNIAKEALEEARNKILKDYGKDYLPPKAKVYSSKNKNAQEAHEAIRPTSIILEPNALKDYLKPEELKLYTLIYKRFLASQMQDALFESQSVVVACE…
	72	UN000132	9774	GGTGTCGCTGACCTTCTACGGAGGACATCTGGTGGCCAACCGGGAGAAGCCACTTCATGGCCACAAGCCACGAGGTTCTCGGCACCATCTCCAAGAATCTGCTTCAGGGAAAGTGGTGATGAGGCAGTTTTAAATATGCTATGGCAGAGATATGAGAATGCCAGTGATAAGGTGGAAAAGAGAAGATTATTGCAAGTCTTTCTTATGCATTTCCTGCGTGTATATAAGAACTGGGAACCTGTCCAGTTACCAGAGACTACATCTAGTGCAGAGTTTGCATCAGATTTTGAGGATGTACTTGTAGGCTGCTCTGCTGGACATCCTGCTGAAATTATTCTTGTGCTAACCCAAGAGGTTCAGTGCTTAACTACTCTTGTCACAGAGTCGCAATCCACTTTA…	3258	GVADLLRRTSGGQPGEATSWPQATRFSAPSPRICFRESGDEAVLNMLWQRYENASDKVEKRRLLQVFLMHFLRVYKNWEPVQLPETTSSAEFASDFEDVLVGCSAGHPAEIILVLTQEVQCLTTLVTESQSTLDLSGSSMNLSIGVDGLDILNTLTVVTRSMHNCRVFGYYGGIQKLTALMKAAVVQLKSVTSAFTADEHLSNPSVEKARILQKILVYVVSVISNFIDLNTKTYEKAQTQSNSVDHSVPKDSSCLVDPSGSFKDPLSKARFHWQQKAIVSVLEAGGLNWLVELLRVIRRLNLKEQRTELSLQYITLRTLRLALHENPRAQNHFRSIGGLEVLLDGISLPSTNTLASKNMFFTDDERSEKPIFDIFQLQLLSLEVLREALFGNLNNLQFL…
	73	UN000136	2250	ATGATTATTCGTTCGCCGGAACCAGAAGTGAAGATTTTGGTGGATAGGGATCCCATAAAAACTTCTTTCGAGGAATGGGCCAGACCCGGCCATTTCTCAAGAACAATAGCTAAGGGCCCTGATACTACCACTTGGATCTGGAACCTTCATGCTGATGCTCACGATTTCGATAGCCATACCAGTGATTTGGAGGAGATCTCTCGAAAAGTATTTAGTGCTCATTTCGGTCAACTCTCCATCATTTTTCTTTGGCTGAGTGGTATGTATTTCCATGGCGCCCGTTTTTCTAATTATGAAGCATGGCTAAGTGATCCTACTCACATTGGACCCAGCGCCCAGGTTGTTTGGCCAATAGTAGGTCAAGAAATATTGAATGGTGATGTGGGCGGGGGTTTCCGA…	750	MIIRSPEPEVKILVDRDPIKTSFEEWARPGHFSRTIAKGPDTTTWIWNLHADAHDFDSHTSDLEEISRKVFSAHFGQLSIIFLWLSGMYFHGARFSNYEAWLSDPTHIGPSAQVVWPIVGQEILNGDVGGGFRGIQITSGFFQLWRASGITNELQLYCTAIGALVFAALMLFAGWFHYHKAAPKLAWFQDVESMLNHHLAGLLGLGSLSWAGHQVHVSLPINQFLDAGVDPKEIPLPHEFILNRDLLAQLYPSFAEGSTPFFTLNWSKYAEFLSFRGGLDPVTGGLWLTDIAHHHLAIAILFLVAGHMYRTNWGIGHGLKDILEAHKGPFTGQGHKGLYEILTTSWHAQLSLNLAMLGSLTIVVAHHMYSMPPYPYLAIDYGTQLSLFTHHMWIGGFLI…
	74	UN000141	732	AGAGTTAAGACCAAGCAAATTTTTATCGGTGGCGTCGCTATAGGGGGTGATGCTCCTATAAGCACGCAAAGCATGACCTTTAGCAAAACCGCTGATATTGAAAGCACTAAAAATCAAATTGACAGACTCAAACTCGCCGGGGCTGATTTAGTGAGGGTGGCGGTGAGTAATGAAAAGGACGCCCTAGCCTTAAAAGAATTGAAAAAAGTGTCCCCTTTGCCCTTAATCGCTGATATTCATTTCCATTATAAATTCGCTCTCATTGCCGCTCAAAGCGTGGATGCGATAAGAATTAATCCCGGAAACATAGGCTCTAAAGACAAAATTAAAGCGGTGGTTGATGCTTGTAAAGAAAAAAATATTCCTATAAGAATTGGCGTGAATGCCGGGAGTTTAGAA…	244	RVKTKQIFIGGVAIGGDAPISTQSMTFSKTADIESTKNQIDRLKLAGADLVRVAVSNEKDALALKELKKVSPLPLIADIHFHYKFALIAAQSVDAIRINPGNIGSKDKIKAVVDACKEKNIPIRIGVNAGSLEKQFDQKYGPTVKGMVESALYNAKLLEDLDFTDFKISLKASDVMRTIEAYRMLRPLVIYPFHLGVTEAGNLFSSSIKSAMALGGLLMEGIGDTMRVSITGELENEIKVARAI
	75	UN000142	9795	GCTGGAGATGGTCCTGCCGTGCTGCGATTGCGAAAATGGGACCAATCACAATTTCAACTCAACCTGTCAGAATTCTGGGAAGCAGTTATCTCTCCCACAAGGGAGGTATTGGTATTGCTTTCATATCAGTCTGAAGCCCTGCTGCTTCCTCTCATTGCGGGGAATATGTCTTCATTCATGTCAATGAATAGAGATGATTTTGATGGATGTTCTTCTCAAGATCATCAGAAGGCAAGTGCTTCTCTTCTGTCCTCTACCGTGTACACAGCTTCAAGCAGGTCAGATTTACCGTCCAGCATAGCATATAGTTCCCAACATGTAACAATTGAACGTGAGAAGGCTTTTTCACATGAAAGTAGTTCCTCGGCATCTAAGCAATTCCCAGTTCTTTATGGTGTA…	3265	AGDGPAVLRLRKWDQSQFQLNLSEFWEAVISPTREVLVLLSYQSEALLLPLIAGNMSSFMSMNRDDFDGCSSQDHQKASASLLSSTVYTASSRSDLPSSIAYSSQHVTIEREKAFSHESSSSASKQFPVLYGVKSLVWGHCGDAYKQSLGAVFKELLVVSGDHGVTVHAFRCLDKCDEGTKSPAPDGGVGQGRWVEWGPSNCSTYNPNAQQQFSSYPESSEDLCEVNRSNGTEGSPSDVHGLHACDDSSSSSCTSKRWLRTYLTEAETIESEGKFLLRFPPKSTFPCSAEVVSFGISFNTSIFSKLFASSNLQLDEKENRNGVVIPGMVSETPSWETNSYYGTAGVGSLLKCSKVFSSSSHRLIGIVLTSVEPDPIKTSGEHAHITSKTRLVVAMAYQW…
	76	UN000146	1497	TGGAAAGCTGCTATGATTGAAGAGATGTCTGCGCTTGAAAAGCAAGGTACTTGGGATCTAGTTGCGCTACCTGAGGGAAAGCATGTTGTAGGGTGCAAGTGGGTGTACACATTGAAATAGTTGCCAGATGGGTCTATTGAGCGATACAAAGCTCGGTTGGTGGCTAAGGGATTCACTCAGCAGTATGGTGTGGATTACCAGGATACATTTGCCCCAGTCGCAAAACTAAAGTCGGTGCGTATTTTGTTGTCGGTGGCAGCCAATCAAAATTGGCCTCTTCATCAGTTAGACGTTTTTCATGCTTTTCTTCATGGTGATCTTCAAGAAGAGGTATACATGGCTTTACCACCTGGGTTTTATCCTAAGGGGGGGAAAGGGAAGGTTTGTAGGTTGAAGAAA…	499	WKAAMIEEMSALEKQGTWDLVALPEGKHVVGCKWVYTLK*LPDGSIERYKARLVAKGFTQQYGVDYQDTFAPVAKLKSVRILLSVAANQNWPLHQLDVFHAFLHGDLQEEVYMALPPGFYPKGGKGKVCRLKKAIVGLKQSPRAWFDKFSTAISQVGFVRSTFDHSVFIKRDGGHTTMIVVYVDDIVLTGDSGDEIQKVKMFLRSVFDIKDLGLLKSFLGIEVARSKEGIFITQRKYVLDLLQETGMLGARPSDSPIEVNHRLHDQKSDLLPNPSSYQRLVGRLIYLTITRPDIAYAVSVASQFMHAPCTHHLDAVYRILRYLKSAPGKGLLYSNHGRLDVAGYCDADWAGSSDDRRSTSGYCTFVGGNLVTWKSQKQSVVARSSAEAEYRAMAHATCE…
	77	UN000154	552	CATAGACCTACTGTTGATCACTTTTATGCGGTCAAACGGATATTTCGATACGTAAAAGGCACACTTGATCATGGCCGACCAGCGCAGCCACTTAATCTCTATGGCTATTCTGATGCGGATTGGGCCGGCTGTCCCTTTGATCGACGGTCTACCACTGGCTACTGCATCTTTCTGGGTCCTAATGTCGTCTCCTGGTGTGCCAAGAAACTGCCGACTGTGTCTCGCTCGAGTGCCGAAGCAGAGTACCGGTCCTTAGCCTCCGCCGCTGCAGAAGTCACTTGGCTTCAGTTCTTGCTACGAGACTTGGGCGTCTACATCTCTCAGCCTACTACCTTGCTTTGCGATAACATCAGTGCAACCTACATGGCCCATAATCCTGTTTTTCATGCCCGCACAAAG…	184	HRPTVDHFYAVKRIFRYVKGTLDHGRPAQPLNLYGYSDADWAGCPFDRRSTTGYCIFLGPNVVSWCAKKLPTVSRSSAEAEYRSLASAAAEVTWLQFLLRDLGVYISQPTTLLCDNISATYMAHNPVFHARTKHIEIDYHFVREKVASRALRVIYVSFQSQLADIFTKALAKDRFHWLRSKLTV
	78	UN000157	1233	TTCACCCCCAGATACGCTTATGTGTGCGATATTTTTTCTAACGGCGTTTTATTAGACAAAGCGTTAGCCATTTATTTCAAAGCCCCCTATAGTTTCACCGGTGAAGACGTGTGCGAAATCCAATGCCATGGAAGCCCCCTTTTAGCGCAAAATATCTTACAAGCTTGTTTGAATTTAGGGGCTAGGCTTGCTAAAGCGGGGGAATTTAGCAAAAAAGCCTTTTTAAACCATAAAATGGATTTGAGCGAGATTGAAGCGAGCGTTCAACTCATCCTTTGTGAAGATGAGAGCGTTTTAAACGCTCTAGCCAGGCAGCTTAAGGGCGAGTTAAAAATCTTTATTGAAGAGGCCAGGAACGATCTTTTAAAGCTTTTGGCGAGCTCAGAAGTTTTGATTGAT…	411	FTPRYAYVCDIFSNGVLLDKALAIYFKAPYSFTGEDVCEIQCHGSPLLAQNILQACLNLGARLAKAGEFSKKAFLNHKMDLSEIEASVQLILCEDESVLNALARQLKGELKIFIEEARNDLLKLLASSEVLIDYSEEDIPSDFLDEVSFNLEKQIASFKDLLDFSNMQKQKNKGHALSIVGKPNAGKSSLLNAMLLEERALVSDIKGTTRDTIEEVIELKGHKVRLIDTAGIRESADEIERLGIEKSLKSLENCDIILGVFDLSKPLEKEDFNLMDTLNRAKKPCIVVLNKNDLAPKLELEILKSYLKIPYSILETNTLNSKACLKDLSQKISAFFPKLDTQNKLLLTSLAQTTALENAIIELQNAKNHLDTLELFSYHILSAIENLNLLTRPYETSQM…
	79	UN000158	1797	GGCACAGGAGCCGTGCATACCGCGCCCGGGCATGGTGAAGAGGACTACTATTTAGGCTTAAAATACCATTTAGAAGTGTTGATGTCTGTAGATGAAAAGGGTTGCTATGATGAGGGCATTATCCATAACCAATTATTAGATGAAAACTATTTGGGCGAGCATGTTTTTAAGGCTCAAAAACGCATTATAGAGCAATTGGGCGATTCTTTATTGCTGGAGCAAGAGATTGAGCATTCTTACCCGCATTGCTGGAGGACGCACAAGCCTGTGATTTACAGAGCGACCACGCAATGGTTTATTTTAATGGATGAGCCTTTTATCCAAAATGATGGCTCTCAAAAAACCTTAAGAGAAGTGGCTTTGAATGCGATTGAAAAGGTGGAATTTGTGCCAAGTAGC…	599	GTGAVHTAPGHGEEDYYLGLKYHLEVLMSVDEKGCYDEGIIHNQLLDENYLGEHVFKAQKRIIEQLGDSLLLEQEIEHSYPHCWRTHKPVIYRATTQWFILMDEPFIQNDGSQKTLREVALNAIEKVEFVPSSGKNRLKTMIENRPDWCLSRQRKWGVPLAFFIDKRTNKPCFESEVLEHVANLFEKKGCDVWWESSVKDLLPPNYQNNAKHYEKVMHILDVWFDSGSTFKAVLEDYHGEKGQSPSDVILEGSDQHRGWFQSSLLIGCVLNNQAPFKKVITHGFIVDEKGEKMSKSKGNVVSLDNLLKKHGSDVVRLWVAFNDYQNDLRVSQTFFIQTEQHYKKFRNTLKFLLANFSDMDLKNLERSHDFSPLDHFILEALETISVGVNSAFEEHDFVK…
	80	UN000159	9417	CTCCTCCACCAAGAACAGCCTGTGGATGAAGATATTCTTCAGGAGCTAGAGCAGATGGAGAGGGAATCTGAAATAGAAGATATCTTGAGCTATAGATCTATTGCAGAACACCAGTTGCAGGAGTTTCTGTCGAATTCCTTGTCTTCCAATACAGCAGTGAATGGTTCTGATACAAAAGAAAAGCAGCAAAATGATGAGCGGTCAGCTGGTGAACCACGAGGATGGTTAAACTGGCTGTCCCTTGGCATGCTTGGTGCTGGCGGAACGGCTGATTCTAGCCAATTTGCCGGTGTTGTTTCTGATGAAATTATCAAGGATATATATGAGGCGACTAAGTTTCATCCATTGCCTTCATTTGATGGGGTTATCAGTGTAAAAGAAAAAGTCTATTTATCTTCA…	3139	LLHQEQPVDEDILQELEQMERESEIEDILSYRSIAEHQLQEFLSNSLSSNTAVNGSDTKEKQQNDERSAGEPRGWLNWLSLGMLGAGGTADSSQFAGVVSDEIIKDIYEATKFHPLPSFDGVISVKEKVYLSSIKFNIHQIVATLGSKNYSRETVRLIFDDATIKCKILEDSVTILSVINSVKMVDPCTENAMLITKETIFEESVVKHGQPFVNSELRMSSLDHGLELSIKVVLQPFEVTYDSSFLFGIMDFHHVLSSVQFQHERVLASLNRFENFKARVLSKAEYIFSSRTRILWDVSFNNVIIKIPWRSNNSELYIMVVESGAILFKSVPECDPLPPTSEHHYDNFFLSILSSTYPEELSSRVQDIYDYFKIDLTGFEVNVIAPNLHQDLSIIERFN…
	81	UN000161	1686	ATGGCACGAAAAGGAAATCCGATTTCGGTAAGACTTGATCTGAATCGTAGTTCAGATTCAAGTTGGTTTAGTGATTTTTATTATAGTAAATTAGTGTATCAAGATGTCAATCTGAGATCTTATTTCGGTTCGATACGTCCACCTACGAGACTCACCTTTGGCTTTCGTCTCGGTAGGTGTATTATTCTACATTTTCCCAAAAGGACATTCATTCATTTCTTTCTTCCCCGTCGACCACGACGACTGAAACGACGCGACAAATCAAGACCCGGAAAGGAGAAGGGCCGGTGGTGGGCATTTGGGAAAGTCGGGCCGATCGGGTGTCTTCATTCAAGCGACGGTACAGAGGAAGAACGAAACGAAGTGAGAGGCCGGGGGGCAGGGAAAAGAGTCGAGTCG…	562	MARKGNPISVRLDLNRSSDSSWFSDFYYSKLVYQDVNLRSYFGSIRPPTRLTFGFRLGRCIILHFPKRTFIHFFLPRRPRRLKRRDKSRPGKEKGRWWAFGKVGPIGCLHSSDGTEEERNEVRGRGAGKRVESIRLDDREKQNEIRIWPKKKQCYGYHDRSPSRKKNPSKLLRVSGAFKHPKYAGVVNDIAFLIENDDSFRKTKLFKFFFPKKSRSDGPTSHLLKRTLPAVRPSLNYLVMQYLLNTKNKMHFDPVVVLNHFVAPGVAEPSTMGRANEQGGSLDKRIRSRIGFFVESLTGEKKCLAEAKKRLTHFIRQANDLRFAGTTKTTISLFPFFGATFFFLRDGVGVYNNRFLEDAREQLLGQLRIKCWNLMGKEKVMELIEKFIDLGGIGELIKG…
	82	UN000167	1206	GAGGGCAACAGCAAGGATGACATGATCAAAGACGCCGCTGCTCTTGCCGAAAGCATACAGCCCAAGGGCAATACGCTGTCCTCAACGAATGTGGTCACGCCTGTACCATTTCTACTTAAACATACGTTGCGTGAGTACCAGCACATCGGTTTGGATTGGCTTGTCACCATGAATGAACGTAAATTGAATGGCATACTGGCTGATGAAATGGGTTTGGGTAAAACCATACAAACAATTGCACTACTGGCGCATTTGGCATGCGTCAAAGGTAATTGGGGTCCACATCTGATTGTTGTGCCATCGTCGGTGATGCTCAATTGGGAAATGGAATTCAAAAAATGGTGTCCTGCATTCAAAATACTCACATACTATGGTACGCAGAAAGAGCGTAAGCTTAAA…	402	EGNSKDDMIKDAAALAESIQPKGNTLSSTNVVTPVPFLLKHTLREYQHIGLDWLVTMNERKLNGILADEMGLGKTIQTIALLAHLACVKGNWGPHLIVVPSSVMLNWEMEFKKWCPAFKILTYYGTQKERKLKRVGWTKPNAFHVCITSYKLVVQDQQSFRRKKWKYLILDEAQNIKNFKSQRWQLLLNFSTERRLLLTGTPLQNDLMELWSLMHFLMPYVFSSHREFKEWFSNPMTGMIEGNMEYNETLISRLHKVIRPFLLRRLKKEVEKQMPKKYEHVIMCRLSNRQRYLYDDFMSRAKTKETLQTGNLLSVINVLMQLRKVCNHPNMFEVRPTISPFQMEGITYEAPRIVYDLLDYEPLKHVDLHSLNLILIDLEITLTAYVSYKSRVLEAPRKL…
	83	UN000171	5367	TTGCAGGAGTCAGGTCATTCATCTTTTAATAATGGTAGAGCTTCTCATACTATTGGAAAGTTGGGAAACTTAATCCGGGAGAATGATGAATTCTATGAGTGCATTACGTCTAAATTCATATCAGATAGTATGCATCCTGTCAGTGTCCATTTGGCTGCTGCAAGGTTGCTTCTCAGCACTTCCCCAACTTGGATGTATCCTATAGCTTTCGAAGATGAGGTGCTAGAGAGCATCAAGCGTTGGGTGCTAGATGACACAGCAAGAGCGTCTGGGGATGAATGCAATGGGAGGCTTAAATGGAATAAAAATAAGCCCACAGATACTGAAATGATGCGAACCTATGCTACAGGAATTCTTGCTGCATCTTTGGCTGGAAGTCCTCAGGTGGTAGAAGATGTA…	1789	LQESGHSSFNNGRASHTIGKLGNLIRENDEFYECITSKFISDSMHPVSVHLAAARLLLSTSPTWMYPIAFEDEVLESIKRWVLDDTARASGDECNGRLKWNKNKPTDTEMMRTYATGILAASLAGSPQVVEDVTSGLSAKLMRFLRSRVLGEVSTSQKDVSHPTENKHSVPTSIRSREETRSRFRQITDATHLDGSRMSDIGLLDEKNVERDHDRGIGIRQVRGEECWVDGGEASAEAVGMFKVDDDDDEQIDEDRRQSRDLRDVKAKSGDRFGTSRPTRDEDGDESARDDSSRRRANRGWTKIRGRGRINEGTAENERALTSPGTATRSGQGQSVRDRHLSRTTEMKRATETRMYSVKSDDDCCVMERDYNDDFFKDCKFGTKDISDLVMKAISAAET…
	84	UN000172	900	GGCGTGAGCGAAGAAAAAAAACAAGAATACGCTAACAGCCTTTTAAAAATGCAACAAAGAATCGTGCAAGGCGAGTTGGATAGTAGAGAAATTGAAATTGAAGTGCATAAAAAAAGCATAGAGATTGATTCTAATGTGCCGCCTGAAATTTTAAGGGTTCAAGAAAATGTGATTAAGTTTTTCCATAAAGAACAGGATAAAGTCAAAAAAACCTTAAGCGTTAAAGAGGCTAAAGAAGCCCTAAAAGCAGAAATTAGCGACACGCTTTTAGACAGCGAAGCCATTAAAATGGAAGGCTTGAAGCGTGCGGAAAGTTCAGGGGTGATTTTTATTGATGAAATTGATAAGATCGCTGTAAGCTCTAAAGAAGGAAGCCGTCAAGATCCCAGTAAAGAGGGG…	300	GVSEEKKQEYANSLLKMQQRIVQGELDSREIEIEVHKKSIEIDSNVPPEILRVQENVIKFFHKEQDKVKKTLSVKEAKEALKAEISDTLLDSEAIKMEGLKRAESSGVIFIDEIDKIAVSSKEGSRQDPSKEGVQRDLLPIVEGSVVNTKYGSIKTEHILFIAAGAFHLSKPSDLIPELQGRFPLRVELENLTEEIMYMILTQTKTSIIKQYQALLKVEGVEIAFEDDAIKELAKLSYNANQKSEDIGARRLHTTIEKVLEDISFEAEDYSGQKVTITKELVQSKLEDLVADENLVKYIL
	85	UN000173	8673	AAGAACGATTCAAGCATTCATGTCCAAAAGATTAGTGCAGAAATAGTAAATACATTTCAGACTCATCTGAATTCCAATTCAGATACGAAGAAGCCTCCTCCCAATCTTGNNNNCCTGGGGAAGGCCGTGGCCAAATCGGATGCAGCTATGGCTGGTCATATGCAAGATGACGACGCACCATCTCATCTAGGGCTCAAACGGTCCTCTTCTTCATCTAGTTTTGATTCTTACTCTGGTTTATATGCAGCCAGCACTCTCTCCTCTCCTGCCGAATCACCACTAAAACCCGATACAACGACGCTTGATGCACCAGATCTCTCTCCAACCCTCCTCGATTTGCTTGAATCTGCGATCGCAGATAGTCCCGGGAGCTTGGACAAACTGAGGGAAGTCGTATGT…	2891	KNDSSIHVQKISAEIVNTFQTHLNSNSDTKKPPPNLXXLGKAVAKSDAAMAGHMQDDDAPSHLGLKRSSSSSSFDSYSGLYAASTLSSPAESPLKPDTTTLDAPDLSPTLLDLLESAIADSPGSLDKLREVVCGNENLEMEEGMTSISVSVVDALLIKMGGAECFDDESGYNNPPTVMQNSKAAVIAGELIPWLSREGDSESCMSPRTQMIRGLLLILRACTRNLSMCSASGLLTVLLHSVEKIFVQENNSTEQMLWDGTDLFHCIEVLATHSLSVIDLRMWLQVVTRTLPSDWATQMILTLEKAMIGNETRAPACTFEFDGESSGLLCQGESRWPFSNGYAFVTWMYIESFYGEGTSFMPRLFSLMSVDNQGVEAYFQPPFLVVECGNVKGKKVCLQF…
	86	UN000175	8604	AAGTTTGATTTGGCACGGGCCAATAAGATGATGTTTTTTGCCGCAAACTGGACCATTGAACAAGCCAATGAAAGTGATATTGCATCTTATCTTCTCTGGTTTCGATGGTATAGTTCTCAGATACAGCCATATTGTGGTTTTTTCGATTCTTTTCTTACCATACTTGAACAAGAAATAAATCATCCAATTTTGACGTTTATTGTTGATTGCCGGAGGGAGATTATCTCTTCAGTAGATCTCGATAGGCAGCCTGTACCATTGTTTACACTGGAGTTGGCGGAATCGTATTCTTCAAATGTACCATTGCTAACATCCAGAAAACATCTGTCCAATGCAATTTACTCTGTGAGCTTGCTCACCCTTAGTCTCCAGCAGTGGAATATTGAAGATGAGTATGCC…	2868	KFDLARANKMMFFAANWTIEQANESDIASYLLWFRWYSSQIQPYCGFFDSFLTILEQEINHPILTFIVDCRREIISSVDLDRQPVPLFTLELAESYSSNVPLLTSRKHLSNAIYSVSLLTLSLQQWNIEDEYACGEEKQLFRMLPMLKSLRQLEKKVLNLIVESPCFDLLFQLYSDLLEHHKWFWKDITSFDLECLFISWCSLKKDAIKLHNICAEEVDSFLVESRNLDEVSSWNFHSQKSMLWVHGGHPFIPSSAGLYFKMQQLLELCDEIWPRKPKSWKQISSGDNCFMAVASATTGLRHLAMEGVCMSSYFVNKCSQHQEDADIVHQLGDIYQMLQERFEYEKQNLKRLSTGNNTQFSLEEKLASFCCAFFPEMVCSNSGFGSWLDTLPLLDRKSL…
	87	UN000176	768	GGTAAACGCGTTATGGCTATGGTACCTGCGAAATCATTGGCAACAACATGTTTGGCTAGTAAGCATATGATGTGGGAGATCCCGTCAACTTGGACCATGGAAGAAGCTTCTACTGTACCTTGTGTATATTCGACGGTTTACTATGCCTTGGTTGTACGGGGAGAAATGAAGAAGGGTGAAAAGATTTTGATTCATGCTGGTTCGGGTGGTGTAGGCCAAGCCGCTATTTCTGTTGCGCTGGATCATGGCTTGACTGTGTTTACTACTGTTGGTAGTAAAGAGAAACGCGATTTCTTAAAGCAACGATTCCCGCAGCTAGAAGAACGATTAATCGGAAACTCACGTGACACATCTTTCGAGCAATTGATTATGAGTGAGACCCAAGGCAAAGGTGTTGAC…	256	GKRVMAMVPAKSLATTCLASKHMMWEIPSTWTMEEASTVPCVYSTVYYALVVRGEMKKGEKILIHAGSGGVGQAAISVALDHGLTVFTTVGSKEKRDFLKQRFPQLEERLIGNSRDTSFEQLIMSETQGKGVDLVLNSLSEEKLQASVRCLGINGRFLEIGKFDLSNNSPLGMSVFLKNTSFHGILLDSVMEGEEQMQKRVVSLVAEGIKSGAVRPLPTSVFNEFQVEQAFRFMASGKHIGKVVIKVRDEEPGKNI
	88	UN000180	1176	ATTTATTTAGACAATAACGCTACAACTAGGATTGACCCTAAAGTCAAAGAGATCATGGATCCTTTTTTAAGGGATCATTATGGGAATCCTAGCTCGTTGCACCAGTTTGGCACAGAAACCCACCCAGCCATTGCAGAAGCGCTAGATAAGCTTTATAAAGGCATTAACGCTAGGGATATAGACGATGTGATCATCACTTCTTGCGCGACAGAGAGCAATAATTGGGTTTTAAAGGGCGTGTATTTTGATGAATGCTTGAAAAAGGGCAAAAACCATATTGTAACCACGGTTGCAGAGCACCCGGCGGTGCGATCCACTTGTAATTTTTTAGAAAGCTTGGGGGTGGAGGTTACTTACTTGCCTATTAATGAGCATGGGAGTATTACTGCAGAGCAAGTC…	392	IYLDNNATTRIDPKVKEIMDPFLRDHYGNPSSLHQFGTETHPAIAEALDKLYKGINARDIDDVIITSCATESNNWVLKGVYFDECLKKGKNHIVTTVAEHPAVRSTCNFLESLGVEVTYLPINEHGSITAEQVKEAITEKTALVSVMWANNETGLIFPIEEIGAICKEKGVLFHTDAVQAIGKIPVDVLKANADFLSFSAHKFHGPKGIGGLYIRSGVGLTPLFHGGEHMNGRRSGTLNVPYIVGMGEAMRLAVEHLDYEKEVVGKLRDKLEEALLKIPDVMVVGDRIHRVPNTTLVSVRGIEGEAMLWDLNRSNIAASTGSACASEDLEANPVMVAIGASKELAHTAIRLSLSRFNTEAEIDKTIEVFSQAAIRLRNISSSY*KEYKGIKM
	89	UN000181	1383	TGTGGGTTTGTGTTCAGGAGGATGGAGGAGGGGGGTGATGGGCGCATCAGGACAGGGACTCTTTGGACAGCAACGGCACATGCTATTACGGCAATTATAGGATCTGGGGTGTTGGCAGTTCCATGGAGTGTGGCCCAGATGGGTTGGCTTTTGGGCCCTCTCATTCTCGCTGTCTTTGCATACATCACCTATTACACTGCCACTCTTCTCTCGGACTATTACAGATCTCCTGCTGGAAGAAGAAACTACACTTACATAGGTGTAGTAAAAGCATATCTAGGTACAAGAGATGTTCTTGTATGTGGCATTACACAATATTCAATGCTCTGGGTAACTTCGATTGGATACACCATTACAGCCGCTACTAGTATCATGGCTGTACAGCGATCTGACTGCCTC…	461	CGFVFRRMEEGGDGRIRTGTLWTATAHAITAIIGSGVLAVPWSVAQMGWLLGPLILAVFAYITYYTATLLSDYYRSPAGRRNYTYIGVVKAYLGTRDVLVCGITQYSMLWVTSIGYTITAATSIMAVQRSDCLHEKGHNARCRASGNLYMIIFGAIEIVLSQFPNLEKVTFLSVVASVMAFGYSFIALYLCIVKFASDQVIRGSLVGDMPGTMGLSLSDKIWHFFQAVGNIAFAYTYAMLLVEIQDTIKSPPPEHETMKKASMYGIGLTTMFYISLGCVGYAAFGNGAPGNILTGFHEPFWLVDIANIGVIIHLIGAYQVFLQPVFAFYEKWLASRWPTVGFFHKIYTFRLPFDKSRSFQFTLCRLVLRTVFVVFTTLVSMMLPFFNAVLGLLGAMAFW…
	90	UN000182	7704	GAAGAGCTCGAGTATCTCGCCCGCTATACAGTGGTGAAGCACTCATGGCGTGGGCGCTACAAACGAATTCTCTGCATTTCCAATGTTGCCATCATCACGTTGGATCCCTCCACACTCGTGGTGACCAATTCATATGATGTGGCGAATGATTACGAGGGATCTTTGCCAGTGCTGGGACGTGATGACAATTCACATGAGTTCACAATCAGTGTGCGGACCGACGGTCGTGGAAAGTTCAAAGGTATTAAGTTCTCGTCGCGGTTCAGGGCAAGCATTTTGACAGAATTGCATAAGATCAGGTGGAGCAAGATTGGGGCTGTCGCAGAGTTTCCAGTACTTCACCTTCGCAGAAGGACTTCAGAGTGGGTCCCTTTTAAATTGAAAGTTACTGCTGTGGGA…	2568	EELEYLARYTVVKHSWRGRYKRILCISNVAIITLDPSTLVVTNSYDVANDYEGSLPVLGRDDNSHEFTISVRTDGRGKFKGIKFSSRFRASILTELHKIRWSKIGAVAEFPVLHLRRRTSEWVPFKLKVTAVGVELIDGKSGDLRWCLDFRDMDAPAIILLADSYGKKIAEHGGFVLCPLYGRKCKAFVASSGTTNAAIISNLTKTAKSMVGVSLAVDSTQTLTTAEFIKKRAMEAVGADETPFGGWSVTRLRSAAHGTANVLGLSLGVGPKGGLGEQGDAVSRQLILTKVSLVERRPENYEAVIVRPLSAVSSLVRFAEEPQMFAIEFNDGCPIHVYASTSRDSLLAAVRDVLQTEGQCPVPVLPRLTMPGHRIDPPCGRVFLQLQQFPTGQQRSVAD…
	91	UN000186	1563	ATCGCTGAGTCTGGACGAATTTTCTTCCGGAACTTGGCTTATACTGTGACAGAAGATGAACTCCAAAATTTGTTTGAAAAATACGGACCCATTGCTGATATAAACTTGCCCGTGGATGCCGTAACCCGTCAAATAAAAGGTTTTGGTACCGTGACATTTGTAATGCCAGAACACGCGATGCAGGCGTTCAACAAATTGGATGGCATAGATTTTCATGGAAGATTACTGCATCTCATACCAGGAAAAAGTAGGGATGAAGACCAGAAAGATCACGAAGATGACCCAGCTTTGTCATTCAAGCAAAAGAAAGCGTTAAAACTGAAAAAATCCGCACAACAATCTGTGAATTGGAATACCTTGTTTTTAGGTGCAAATGCAGTCGCGGAAATTTTAGCAAGA…	521	IAESGRIFFRNLAYTVTEDELQNLFEKYGPIADINLPVDAVTRQIKGFGTVTFVMPEHAMQAFNKLDGIDFHGRLLHLIPGKSRDEDQKDHEDDPALSFKQKKALKLKKSAQQSVNWNTLFLGANAVAEILARRFNTTKEKVLDTSDGGSSAAVRIALGETQIVIEMKNFLEENGVRLSAFDSPKEKRSKTIILAKNLPADTTVADLTPIFAKFGPIGRIVLPPSGVTALIEYCDPSEAKQAFKKLAYSKFKNVPLYLEWAPEQSFTTTLNGETIIQKQEEESKTEPEKGQKTIQETDNAKNEGDDNEDDLTNEAPEPNTTLFLRNLNFKTIPETIKDHFKHLGAIHTVEVAKRKDPKNPRSLVSMGYGFIQFKLAEAAEKALKKMQFTKIDGNEVELK…
	92	UN000187	3585	TCAATCCGTTTCCCGCCTGCGAGAACTCCTCTGAACTCGATCCAAGATCCGTCGTCGCAGATCGACGATTCGGATTCTAAGCTCAGGTCTGAAGCTGGTCGGTCCTCGCGATTCTTCTCGGAGAAGAAAGCTGAGGTTTTGGATTATGCGACTCCGAGAGCGGCGGTTCGGCTGAATTCTCATTCGGAGCCGAATTCTGCGCAGAGTACGCCGGCGAGGAGTGTTTGGAAAGCTTCTAATTATGGGAGCTCGGTGGCGGCCTGTACTTCCGGCCGGCCGCCTCAGGGAGGCAGAGGGGGGAGCCTTTCTAAAGTTTCTAGAGGCATCTCGACTGCGGCAGCGTCACCTTGGCCGCTGGTCGAAGTTCCGCATTTCGTGCTGGTGGAAGATTCTTCCTTT…	1195	SIRFPPARTPLNSIQDPSSQIDDSDSKLRSEAGRSSRFFSEKKAEVLDYATPRAAVRLNSHSEPNSAQSTPARSVWKASNYGSSVAACTSGRPPQGGRGGSLSKVSRGISTAAASPWPLVEVPHFVLVEDSSFWMDHNVQVLIRIRPISSTERTLQGYGRCLRQESAQTLTWLGHPETRFTFDHIACETISQEKLFKAAGLPMVENCMSGYNSCMFAYGQTGSGKTYTMMGELSEIVDGLSGDCGMTPRIFEYLFTRISDEEEKRRDEQLKYSCKCSFIEIYNEQITDLLEPSSTNLQLREDMKKGVYVENLKEYEVTTVKDVIKLLLQGAANRKMAATNMNSESSRSHSVFTCVIESQWEKDSMTHFRFGRLNLVDLAGSERQKSSGAEGERLKEAAN…
	93	UN000188	1335	ATGGTCCAACTACAGAACTTCTTCTTTTTCATTACTTTTATGGTCGTGCTTTGTGGCACGGCAGCACCCGTACTATTGAAATGGTTCGTCAGTAGAGATGTTTCCATAGGTGCCCCTTTTTTCAATGGTACTATAATTCCTATTCTTATCTCTTCATTCTCTTTTTTGGTTTATCTACATTCCAGGAAATTTATACGCTCCATGGACGGAGCAAAAAGTGGAGTGTTGGTCAGAGCAAGTCGCCCTATTCTATTACCAGACATAATTGGGAGAAGCTCATCCGCTAGAAACGCTTCATTTCGTTTCGTTCCCGTTCTTCATTTCCTTCTTCTCGAATCCATGGGGGACTTGTCATATTTAGAATCTTTCTGCGGTGTGCTCCGTTTACTATTCTTTCGT…	445	MVQLQNFFFFITFMVVLCGTAAPVLLKWFVSRDVSIGAPFFNGTIIPILISSFSFLVYLHSRKFIRSMDGAKSGVLVRASRPILLPDIIGRSSSARNASFRFVPVLHFLLLESMGDLSYLESFCGVLRLLFFRTLFSLPRDRSAKRERARRRKRQTLRPNGNEQRRNDKMRCPGHPHLERRVEGFGPVAFPVPPSSGGACVGGVPPEIGLEALALPASRPLMAVGHDYYQKDSMKIHISHGGVCIFMLGVLLSKTKKIQFTQRLPLSSELHMGKERCCLRGVDHLHGPTFHSICGNLMIYKPSLTNDRLMFEHDESLRADLLPINFPASYENGKLEHFLHRWMKNREHKNFWLTMFPEKRYFRETTSTTEVAMHTNQFMDLYALIGTGSSITGGWYTII…
	94	UN000191	8037	ATCAAAGCATTCATTGACAAAGTCATCAAGAGTCCCTTACATGATATAGCAATACCCCTTTCTGGTTTTCGATGGGAGTACAGTAAGGGAAATTTCCATCATTGGAGACCACTTTTTCTACATTTTGATACATACTTCAAGACACATGTGTCATGTCGGGAAGATCTTTTACTATCAGATAATATTTCAGATGACATTGATGTCTTTCCAAAGAATTCAGTCCTTCAAATTTTAAGGGTCATGCAAACAATTTTGGAGAATTGCCCCAACAAGAGTTCATTTGGTGGTCTTGAGCATTTCCAGCTACTTTTGGCATCGACAGATCCAGACATAGTTCTAGCTACTTTAGAGGCTTTGTCTGCACTTGTGAAAATAAATCCCTCCAAGTTAAATGTCAGT…	2679	IKAFIDKVIKSPLHDIAIPLSGFRWEYSKGNFHHWRPLFLHFDTYFKTHVSCREDLLLSDNISDDIDVFPKNSVLQILRVMQTILENCPNKSSFGGLEHFQLLLASTDPDIVLATLEALSALVKINPSKLNVSGKLIGCGSLNSHLLPLAQGWGSKEEGLGLFSCVMANEKSQEEGLCLFPSDVDNESDKSQYRLGSTLHFEFHVXTSGCEYXSSDRSQSSNLCVIHIPELNLQGEDDLSILKHYISKHAVPPEHRFSLLTRIRYARAFRSSTCRQYTRICLLAFTVLVQSSDAHDELASFFANEPEYTNELIGLVRSEDAIPGTIRTLAMLALAAQLAAYSSSHERARVLSGSSIISASGNRMILLSVLQKAVSSLSNARDPTSLSFIDALLQFYLLH…
	95	UN000192	1110	ATGAATCCAGCGAAGTGTGCTTTTGGAGTCACTGCAGGGAAGTTTCTCGGGTGAATTCTTCGTCGAGTTGGCATTAGTGTTGATCCTCAGAAGACCAAGGCCATCCTTGATATGCCTTCTCCCAAGAATCTGAGAGAACTACAAAGTGTTATTGGACGTCTCTCGTGCATCCGACGATTTCTACCCCAGTTAGCAGAGAAGCTGTTGCCACTCTTCCAACTGACGAAGAAGAGTCAGAGGTTCCCATGGACTGCCGAGGCGCAATCAGCCTTTGACTTGGTTAAGAAGGACCTACTTGAACCTCGGGTACTCATGCCTCCACAGCAAGGAAAGCCCTTGATATTGTATATGTCGACGATGGAGAGATCACTAGGTGCGTGACTTGCTCAAGAAGACGAA…	370	MNPAKCAFGVTAGKFLG*ILRRVGISVDPQKTKAILDMPSPKNLRELQSVIGRLSCIRRFLPQLAEKLLPLFQLTKKSQRFPWTAEAQSAFDLVKKDLLEPRVLMPPQQGKPLILYMSTMERSLGA*LAQEDESGLERPVYYLSRILKGPELNYSRAEKTCLALVFAAQRLRHSLLAHSVRLMTKASPVRYLLSQPALSGRAAKWLLRLSEFDIVCTPPKAIKGQAIADFLASFPVDDGTPLEDDIPAEIMQIEASWANYFDGAA*SVGGGAGVVFVTPEQDVIPHAFKLDYPCTNNVAEYEALMLGFTLALDMGVRVIEVCGDAQLIVNQVTGSFAVKKPHFFPYHARVQNLLRRFDDFTIRHIPRTSN
	96	UN000198	1461	GGCTGGGCAAAGAAGCAACCACGGAAAACGTTCCTACTCTCAATCAGACTATCCCGAGAATGGAGGAAGCAAGAGGAGGAATCCCGGGGAGGAGAGAGAACAGTATGCTCCTGGCCCAGACGACACCGTATACCGATACTTGTGCCCGGGGAGAAAGATCGGGAGCATCATTGGGAGAGGCGGCGAGATTGTCAAGCAGCTGAGGCAAGAAAGCCAATCAAAGATCAGGATCGGCGAGAGTGTACCCGGGTGCGAAGAGCGTGTTGTAACCATCTTCAGCACCAGCCGCAAAACCAATGCTTTTGACGACTCTGGCGATTATATTTCTCCAGCCCAAGATGCTCTCTTCAGGGTTCATGAGAGGCTTGCTGCAGACGAGGCTCCCGGGGAGGAAGATGA…	487	GWAKKQPRKTFLLSIRLSREWRKQEEESRGGERTVCSWPRRHRIPILVPGEKDREHHWERRRDCQAAEARKPIKDQDRRECTRVRRACCNHLQHQPQNQCF*RLWRLYFSSPRCSLQGS*EACCRRGSRGGR*GGRGSSSNHCSTTRAI*SDWMHHWKRWTDHSRHTQ*HRCSDSHSEERTSPCLCH**R*ASPDLW*SFSCKESTLPNLISTS*KSLTISASSLLYRTKHVSSRWSVCGPKFRRPNHGFNSTDGSLWRLQR*CWR*VVLTSLYPAPRDESAAKEFSLRLLCPTGNIGGVIGKGGVIIKQIRQESGAIIKVDSSSAEGDDCIISISAKEFFEDPISPSIDAAVRLQPRCSEKTERESGESLYTTRLLVPTSRIGCLIGKGGAIITEMRK…
	97	UN000199	330	ATGGATTTTCACAGCATGACAAGAAAAGGACTTCAAGCACTATGCAAAAAGCACAATCTCCCTGCAAATGGCACCAATTTGAAGATGGCAGATGCTCTTTCTGCCCTCCTCAACCAGGCCCAAAAAGAGATCAAAACCAGAAACCCTTCTTGCTTGAAGGGTTCATCCGGAGAACGGGTTGTGCAAGTTGCAGAACTAGATCTGGTGGATCCGAAGGCCGTCCCCAGAGAACCCAAGAAAGTTAGGTTCCTTTTGCAGGATGAGATTCCTGATGAGGAACTGTCCCATGGCAAGAGAAAAGTGGGCAGAATTTCATCTCAAATCAGGCAT	110	MDFHSMTRKGLQALCKKHNLPANGTNLKMADALSALLNQAQKEIKTRNPSCLKGSSGERVVQVAELDLVDPKAVPREPKKVRFLLQDEIPDEELSHGKRKVGRISSQIRH
	98	UN000200	1113	CCGCCCGCCAGCAGCAGAGGGGGTTCGATTCCCGTTATACGCGATGTGGCGAAAAAGACTGATTTAACGAGATATGCCTTGCCTGCATTAAGATTTAAAACTTGTCGTCTACTTCTAGGAAATGTTTGGAACAGAGAACTTACAATAATACAACGCCGCATTCTCCGAAGATTGAGGAACAAGAAGAGATCTATTAAGAGAAAGATTTATTCGAGACAAAATCTAAACAGTTACATCAAATTACAAACTACACGAAAGTTGTCCCTTTTTTATGGGGATTTACCCATCACAGAGATGCACAGAGGAACAGAACGAACTTCATATATCCCTTTTCTACTCAATCTAGAAACAAGATTGGACGTTATTCTGGTTCGTCTCCATTTTTGTGAAACTATTCCT…	371	PPASSRGGSIPVIRDVAKKTDLTRYALPALRFKTCRLLLGNVWNRELTIIQRRILRRLRNKKRSIKRKIYSRQNLNSYIKLQTTRKLSLFYGDLPITEMHRGTERTSYIPFLLNLETRLDVILVRLHFCETIPQARQLISHRRVCVNNGMVSITHLKVSHGDLISFQENDARTCGEEIRRSFYIDISVEKIIGKFLVRMWRRTKTEWFRLLKTKRGCRLLLKSRFLQQLRSSMQEEDLERTKKFGSEKVCLGSSFAEHNRMKRNLYHFKFVFLSKRRNEKNRNLPTRTISPLVKNSSLYSNSTYCSGSPHQFTRKRRIKRIELPTHYLEVNYRTLKAVVFYGPNIGHIPHDIRLKDLNLLLWSGNGRGQNI
	99	UN000203	288	TTGAAGAAACTTATTAAGCAAATTCAGTCACACAAGAGTGCATGGCCTTTTATGGAGCCAGTGGACCCAGAAGAAGCGCCCGACTACTATAAAGTCATTAAAGAACCTATGGATCTACAAAAAATTGAGAAGAAATTGGATACAAACGTGTACACTAAATTATCGGAATTTATTGGTGATATGACGAAAATTTTCGACAACTGCCGCTACTACAATCCAAAAGATTCATCGTTTTACAAGTGCGCCGAGACTTTGGAAGCATACTTTGTGCAAAAAATTAAAAATTTC	96	LKKLIKQIQSHKSAWPFMEPVDPEEAPDYYKVIKEPMDLQKIEKKLDTNVYTKLSEFIGDMTKIFDNCRYYNPKDSSFYKCAETLEAYFVQKIKNF
	100	UN000210	7329	TCAGAGAAGGGGCGCAAAAGCACAGTTAAGAAGGGCCATTCAGGTTTGGAGAAGGCGAGGAAAGTTGAAAGTGGGAAATTGCGGAAAGGAGAAGTGGAGAATGGGGAGATTGTGCCAGAGAAACAGAGGAAAGTTGGGGCAGTAGAGAAGGGGGAGATTGCACCAGAGAAATTGCGAAGAAGGGAGATTGAGAAGGGGGAGATTGTTTCTGAAAAACTGCGAAAAGGCGATATGGACAAAGCTGAGGATGAAATTGAGAAGGGGGAATTTGTTCCAGATAAATGGCGGAGAGGGGAAATTGAAAAGGGAGAGTTTGTTATAGAGAAAAGTCGAAGAGCGGGGTTAGAGAGGGAGGAATACAGTCATGGGAGAATCCAGAGAGGGGAGATAGAGAAGGGA…	2443	SEKGRKSTVKKGHSGLEKARKVESGKLRKGEVENGEIVPEKQRKVGAVEKGEIAPEKLRRREIEKGEIVSEKLRKGDMDKAEDEIEKGEFVPDKWRRGEIEKGEFVIEKSRRAGLEREEYSHGRIQRGEIEKGEFVPEKWRREELDKSGIGRGRREEEVEKGEFIPDRWRNGDVEKGEIVSDKWRKGEAVKEEFSSGRGRRREVEKGEFIPGKGWKDELDRTPKKETTTSVKFGDRSGSDQRRRSSRWESSNERDLKSSSRIVDGDLGLHKHEYSDGKNHGREHSFGTWPKRDVLESEGSNRKNHGDFGEYLGCKSRRISDDNNHSTYSDKLHSSVERSYRNVSLSSKVSTSSRYASRLYESSSRGGGSDRRGRSPYHERSPHDRVRYQNHRDRSPARP…
	101	UN000212	8121	ATGGCGCCCTCACAGTCACAGCCAGTTAAATCTCTCAACAAAGGCTCTGGCCGTCGTCGCTTCGTATTCAAGACTTTTGCTCAGAGAGTGGAAGAGATTGACATCAATGTCTATCGCAGTCTCGATACGACTAAGCCCGAGCCTACGGCAGCTTCTTCCTTTTTTCTAGAGAGCCTTCTGCAGTGGCGGGAATTGAATACTGCTGAAGACTTCATTTCATTTTATGAAGAGATGATGCCATGGGTGCAAACGTTGCCTCAAATTTTGCTGCACAAAGAAGCAATAATTTCAAAACTTCTTTGTAGATTGAAAATGCAAGCGAAGTTATCGCTTGAACCCATTCTCAGGTTGATTGCAGATTTATCTAGAGATCTTCTAGAAGAATTTTTGCCTTTCTTG…	2707	MAPSQSQPVKSLNKGSGRRRFVFKTFAQRVEEIDINVYRSLDTTKPEPTAASSFFLESLLQWRELNTAEDFISFYEEMMPWVQTLPQILLHKEAIISKLLCRLKMQAKLSLEPILRLIADLSRDLLEEFLPFLPRVSDSLVDLLKNGGEREPEILEQVFTSLSFVMMYLQKYLVRDVVHVLKITIKLRYYPKDYVQEFMAEAVSFLLRNAPTEQVIQGIRKVLIEVVKKPLPVRKAGVSALLWHSMRGTSLRLHSKAVDLLRLLMDNSILGIGDKFTPGSDTVVEVICGAFERLSELNQEVLNFVSDLILDEISDCIRDDCFLHLSRLLSLLYSVQSKKRGRSCGCSQILQLVEQLVQKVIIPSVGIMAENDGFEVVNKTLQLILCLLDDPSVVSEISV…
	102	UN000216	186	GTTTGCTCCCTTGGTGTCAAAGGGCGAGTTCCTTTCTTGTCTTGCCCAAAAACAGTCTTTATTCTCATTGGAGAAAGACTCTCCCGCGGCAAGGCAGTCCAGCTGCTTTCTTTATCTCGCTTGCCGTTAGTCCGTCTAGCGTCTTTCGGTTGGGGTCCGCCCCGGGGGTTAGACCGCTTGGGTTAT	62	VCSLGVKGRVPFLSCPKTVFILIGERLSRGKAVQLLSLSRLPLVRLASFGWGPPRGLDRLGY
	103	UN000222	7989	CGTGAAGAAACCCTAGAAAAGATCGAGCGCGCTGTTGGCAAGGTGAACCGCGATCTTCTCGCTGCCGGGGAAGGCGTCTCGGCATGGAAGGTCTCTCAGTCTGCTCTCTTGGTGCTCGAGGCAGATTCGTTCGGCTCGCTAGGGTTTCAGTTGCAAGAGATTCCTTCTCTGTATCGCCTCATCGCCATTGAGAGCAAGGTGAATGCATTTATAAATTGCTTTGTGGGCGTGCGGATGATCACTTCATTGCATGATCTTGATATTGCCATTTGCAAGAATCAAGGTGTTGATCGGTTTGAAGATCTTGGTATGGGGCCTTTACTGCGAAATCCACTTGTTGAGCATTATTTCTCAGTTCCTAAAGATGCAACTGAAATATTCAAGATATCGAGTGAGGAT…	2663	REETLEKIERAVGKVNRDLLAAGEGVSAWKVSQSALLVLEADSFGSLGFQLQEIPSLYRLIAIESKVNAFINCFVGVRMITSLHDLDIAICKNQGVDRFEDLGMGPLLRNPLVEHYFSVPKDATEIFKISSEDIISSLVDYMHICPGPEIRVEDFLNFIAKQKSVAVRERLGIRIRSLGMHITFIREAKKAEKLTLKRHLRAFKHTSDSIVSEKQVLDGRFNSISERMKLFSFVHEGKHIRFESSSSEDDNEHDVDNREDGGNDNDSKGWCLNSSQNKKNNDQRLSSCPYPSASEEMLRLGLKIDMDGQVSPASVGLKESEGRKSSGKKRKVEYQCSNPSIYKLQKTEKENESVQVLHTVVRNPSEVSKDKSQPGDTGNDDQEDSYDLKLTSDDIRKFI…
	104	UN000223	4221	ATGACTGAGGATACAGAATATAAGAAATTGCCCGTGGACGAGCGTTGCGTACACAAATTGTGGAAAGCACGCGTAGATGGCTATGAAGAAGCGGCCAAAATTTTCCGTGAAATCGACGATGAAAAATCGCCAGAATGGATGAAGTTTTTGGGCCTCATAAAAAAGATGGTCGTCGACTCGAATGTAGTCGCCCAAGAAAAAGGACTCGAGGCGGCTTTGATATTTGTTGAGAATTGCGGTCAGGCGGGCAAAACAGTGGGCGATGTGATGGCGGGCATTGTGCAGAAGTGCATTGCAGCACCTAAAGCCAAAACCAAAGATATTGCCGTGCAAGTGACGCTCATGTATATTGAAATTGAAAAGCAGGAGGCTGTCATGGAGGAGCTTATCAAGGGCATG…	1407	MTEDTEYKKLPVDERCVHKLWKARVDGYEEAAKIFREIDDEKSPEWMKFLGLIKKMVVDSNVVAQEKGLEAALIFVENCGQAGKTVGDVMAGIVQKCIAAPKAKTKDIAVQVTLMYIEIEKQEAVMEELIKGMEHKNPKIVAACVSATTMALRDFGNKVVGVKPLIKKLAPLMSDRDKTVRDEGKQLAIEIYRWIGAAMKPQITSLPQVTLKELEDEFDKLKGEKAEPSRYLKSQQEKQQQISAAAAEHDEAGDDDDGEGEEVVDPMDLIDPVDILSKMPKDFYDKLEEKKWTLRKESLEALEKLLTENPKLENGEYGILVNTLKKVITKDTNVVLVAMAGKCLAMLANGLGKRFGTYAMACVPSLLEKFKEKKANVVAALRESTDAIYPSTSLEAMQE…
	105	UN000224	7812	TTGACCACTGTTGCCCGAGAGGTTTCGGCCTCATCTACAAAGCAACGCGTCCGAATCTTCCGCGATGACGTTTCATCGATTCTGCAGAATCCAGAGATGCCAGTCGAGGTTGCATCTTTTTTGGTTGATATTATCTTCAAAACATTGTTTATATATGATGATCGGGCGTCGAGAAAAGCTGTTGAGGATGTGATTGTTAAAGCTTTAGCCGATACTAACTTTATGAAGAGCTTTGCTGCGGCGCTTGTTCAGGCGGTAGAAAAGCAACTAAAGACTAAGAGCCCTGTAGGATGCTACAAACTTCTTAAGTGGTCCTGCCTCCTCCTCAGATGGAGTCAATTTACCTCTGTTTCAAAGAATGCATTCGTCAGAATTGCTGCATCACAAGCGTCCCTGCTT…	2604	LTTVAREVSASSTKQRVRIFRDDVSSILQNPEMPVEVASFLVDIIFKTLFIYDDRASRKAVEDVIVKALADTNFMKSFAAALVQAVEKQLKTKSPVGCYKLLKWSCLLLRWSQFTSVSKNAFVRIAASQASLLHILLHCSFRVRRACKQIFLHLFSESPDLYKMYTEELKESRISYGDGGELIWVLLDFSTRTSALYEQYKPLFLELYVKAVLNAKEKPTKILSDAFHPLFIRMVHEDFKTVVVPASVKMLKRNPEIVMESVGVLLKSVNLDLSKYAVELLSVVLPQARHADEGRRICSLAIVGCLAQNSSDPDALLAIFNAIKAVIGGSDGKLTSSYQRVGMINAVQELSKAPAGKSLNFIAPSICTFLISFYRDDGSEEVKLAVLSALALWANRSAE…
	106	UN000225	87	ATGGCCAATCCCGGCGTCGGAAGCAAATTCGTCTCCGTCAATCTCAATAAATCCTATGGCCAGCCGCCGGCAACCTCCGGCCGCATT	29	MANPGVGSKFVSVNLNKSYGQPPATSGRI
	107	UN000230	7446	TGGAGTTTGATATCTTTTGTTGATTTGTTAGCTTTTTTTGCCATTCAATCGACTGCTCCAAGAATTGGATTTCAGAATCATCGAAGATCTTTTGTATCATGGTGTATAGTTATCTTTTCAGCTATTGTAATTTTAGCGGAAATCATATTTCATGTCATTTGGGCTGTCGAGGGGGGACAATGGAGCATTGCAAATACTTGGTGGGCAGAGTCCATTGGGTTTGTGAGTGTCCAACCCTGGAGATCAGCATCTGTAATTTATTATTTCTTGGCTATACAGCTAGCTGCTGCTTTAGTTGCATTAGTTGATATTTACGGGCACAGATTTGGACTGATTCCTTGGGGAGATTCTTGCTGGGGAAAGTTTTCTTCATATATTGAACGTTTAGGTTCTCACCTC…	2482	WSLISFVDLLAFFAIQSTAPRIGFQNHRRSFVSWCIVIFSAIVILAEIIFHVIWAVEGGQWSIANTWWAESIGFVSVQPWRSASVIYYFLAIQLAAALVALVDIYGHRFGLIPWGDSCWGKFSSYIERLGSHLRVACCLLLPAVQLVVGISHPSWASLPFFICSCVGLVDWSLTSNFLGLFWWWRPLLVYAGIFIVFLYVYQLPVAWPMMIQVVADFIGFYKVSASSEWTEISAGVSLLVFYFMLSSAKIDLKEMDTIMSMRAGSLTEQLMPSKHSFFIRVSRSGVRHTNMLLRGAVFRNFSINFFTYGFPVSLLALSFWSFNFASVCAFGLLAYVGYILYAFPSLFHLHRLNGLLLVFILLWAASTYIFNVAFTSFNKKMWKDMEIWETVGLWHYPIP…
	108	UN000232	573	TGTTGTGTTTGCTTGGGAGATCGAAGTGATGACTCAAATGAGATCATTGAATGCGATGGGTGTGGAGTATCTGTACATGAAGGCTGTTACGGTGTGAATGATAATGTAAGCATCTCGAGCACTAATTCTACATGCTCAACAGAACCGTGGTTCTGTGAAGCTTGCCGTGCCGGTGTTTCGGAACCCATTTGTGAACTATGTCCAAACAAAGGTGGAATATACAAAGAAACGGATGTCGGGAAGTGGGTACATCTAATTTGTGCCCTATACATTCCAGGAGTTGCTTTTGGTGAAGTTGACCAGCTCTCCTCTGTTACTTTATTTGAAATGCCCTATAGTAAGTGGGGGGCAAAAGTTTGTACACTATGTGAAAACTCACGTTTTGCCAGAACGGGTGTT…	191	CCVCLGDRSDDSNEIIECDGCGVSVHEGCYGVNDNVSISSTNSTCSTEPWFCEACRAGVSEPICELCPNKGGIYKETDVGKWVHLICALYIPGVAFGEVDQLSSVTLFEMPYSKWGAKVCTLCENSRFARTGVCIGCDAGMCKTYFHVTCAQTSGFLTEAHHEEAEAADPFFAHCKVHSEKEMMKRRKRNY
	109	UN000234	7491	ATGGCTGAAGAGCCTCATGAAACTGGAGAGGTCTCTGATAAGGATTCAGAGAGGAGAAGCGCTTCATTGCCTTTGGAGCATGTGACCAGTGATGGTGCTGAGTTGGGAAAAGAGAAAGTAGCAGAAGTGAGTTCCACGAACTCGATCATGGCTACTGAAAACTGGGTCGGGTCGCCTAGGGATGAGGAAGACCGATTCGAGCAGGTGTCACTGAAAGATCAAGAGGGAAGTGTTCTGGAACCTGAAGGCAATTTGGAATCACCAACAGTATCGACATCAGACAATGTGAGCCCGGCAGCTGAATTGGCTGTAGGGAAAACGGTGGCTGAATTGGATGGGGCTATTGCTGCTGATATGCATGAAAGCCCTCATGCGAGCATGGGATTGGAAAACCTGTCT…	2497	MAEEPHETGEVSDKDSERRSASLPLEHVTSDGAELGKEKVAEVSSTNSIMATENWVGSPRDEEDRFEQVSLKDQEGSVLEPEGNLESPTVSTSDNVSPAAELAVGKTVAELDGAIAADMHESPHASMGLENLSDRDMKPSLSLGSPDSSMGFTGDSVISSPFASPQKPKTKPSMPNVSPELLHSVDSAITGEPSGLENLRGVVSCNNKPAQDKEVVDIAFMVVDALLVKMGGVECFDDREGSNPPNVMLNSRAAVVAAELIPWFPWEGGSEGQMSPRTKMVKGLLAVLRACTRNRSMCTVADLLGVLLWSAEKIFAQEVDSTNQILWDHTPLCHCIQVLATHSLNVVDLDRWLQVITRSLPTVWSTDLMLALEKAMGGMETRGPACTFEFDGESSGLLG…
	110	UN000236	6342	GAACTGGCGAGCTGCAAGTCTTTACTGGAAGCCTCACAAATGGAAAATGCTAACTTAACAGGAAATCTCCTTAGTGCAACAGAGGAGCAGAAGACACTCGAGGTGGAAAAAGAGTATTTCACCAAGGAGAACATGAAACTTTCAGCCGACCTTTTACAACACAAAGAAAACTTGGTGATGGCACATGATAAGCAAGTCCAGCTTGAGGCTTATGTAAAAGAAGAAATGATGTTTGTTGAACAACTAACAGAGGAAAATATACATCTTTCCAGCAGTTTAGAGTTACATAAAGATATCATAAAAGAGGCTGTTGACAAGTACCGGCAGTTATATGCAGATGCTGCTGGAGCCGGATGTCAACCTGAAAAAGTAATTGAGGATTCCCAGTTTCGTGATGAA…	2114	ELASCKSLLEASQMENANLTGNLLSATEEQKTLEVEKEYFTKENMKLSADLLQHKENLVMAHDKQVQLEAYVKEEMMFVEQLTEENIHLSSSLELHKDIIKEAVDKYRQLYADAAGAGCQPEKVIEDSQFRDENFDRGVAVSGQVESVPVLHLQGYLVLDIETKDFDDSDGLFALKVHLEEVEKMVQKLEKDIHELQTHSVSLNRAGSKVTSPGISKLIQAFESKVHQEETALDEVPQTEERSADPFLSAREQTANLRAMLKQLDLDAEKANELLKREQDSTRLATVSLSEVQAEYESQKAQNNILVAKNDSMVEKLAKYQKTVDGLLNQFNELQQNADERACLISHQVVNLQKEVDDNTSILEHQRNSLLSAISEAVEKLDTQIELLAPTGLTSSNNS…
	111	UN000238	96	GCAAGAAGCATATTCATCTCGATCTGCAACTATAGAAGGATCTTGAATTGGCTGTACCCCCACCAGAAAGTGGGTAGTGCCTTTCCCACTCGGTCT	32	ARSIFISICNYRRILNWLYPHQKVGSAFPTRS
	112	UN000241	7395	ATGGCCAATCCGGGAGCTGGGAGCAAGTTCGTGTCTGTAAATCTCAATAAGTCGTATGGGCAGCCCCCGAGCTCTTCTGCCAATGCCGGCCGGATTCGCCCCGCTCATCATGGTGGCGGCGGTGGAATGGTGGTTCTATCGCGGCAGAGGAGTTCGGTTTCGGGGAGCACGAAGGCCGGACCGAGACTATCGGTTCCACGCCCCTTAAATTTACCATCTTTGAGGAAGGAGCATGAGCGGTTCGATCAATCTACGGCATTGGGCAGTTCTTCTGGAGCGAGAAGTGGCGGATCTGGATTGGGTAATGCCTCTTCTGTTGCCGGATGGACAAGGCCGGGGCTTTCTGCTACTTTGCTGGAGAAGGGTGGCAATGGGGATCACACAGTTGGACGGTTGGGC…	2465	MANPGAGSKFVSVNLNKSYGQPPSSSANAGRIRPAHHGGGGGMVVLSRQRSSVSGSTKAGPRLSVPRPLNLPSLRKEHERFDQSTALGSSSGARSGGSGLGNASSVAGWTRPGLSATLLEKGGNGDHTVGRLGSDNQRVSSPGDGGVRGGGGIYMPPATRLGSVAASRHGSARDAVSVEKAVVLRGEDFPTLHATLPSVSAQKQKDVLHPKQKPSEGVLQEHSMSSELRLQLHMRPQMHSSRLVVGSHSNENEVKSNTSSGLNGKEQSQKLDRYLPGPLPLVRLRHTSDWEDDERDTGHGFPNRDRDHGLTRNASVQDRDFDIPRGGLPRTLVRDQSDGRGLRDAEHIKVSSGEVLRGDPYRRELTTPIREVGNGSSWRVSPSVVKDGFSSREIRISRN…
	113	UN000244	816	CCTGCGTGTTTCGACGAGAACACCGAAAAAACCTAATTCAGCTCTACGTAAGATAGCCAAAGCCCACTTGAGCAATTTGACATTCTCTCATGGATTCCTATGAATATAGGAAACTTGGATTTCTCATTCACAAATCTATCTTTGTTTATGCTGCTAACTCTCAGTTTGGTCCTACTTCTGGTTCATTTTTTTACTAAAAACGGAGGGGGAAACTTAGTACCAAATGCTTGGCAATCCTTGGTAGAGCTTATTTATGATTTCGTGCTGAACCTGGTAAACGAACAAATAGGTGGTCTTTCTGGAAATGTTCAACAAAAGTTTTTCCCTTGCATCTTGGTCACTTTTACTTTTTTGTTATTTTGTAATCTTCAGGGTATGATACCTTATAGCTTCACAGTG…	272	PACFDENTEKT*FSST*DSQSPLEQFDILSWIPMNIGNLDFSFTNLSLFMLLTLSLVLLLVHFFTKNGGGNLVPNAWQSLVELIYDFVLNLVNEQIGGLSGNVQQKFFPCILVTFTFLLFCNLQGMIPYSFTVTSHFLITLGLSFSIFMGITIVGFQRNGLHFLSFLLPAGVPLPLAPFLVLLELISYCFRALSLGIRLFANMMAGHSLVKILSGFAWTMLCMNDLFYFIGDLGPLFIVLALTGLELGVAILQAYVFTILICIYLNDAINLH
	114	UN000246	7254	ATGCAAGAGACCGTTCGAGAGGTGCTTTTCGAGACCCGTCAGCACGCCACACAATCCTTCTCCCCAGATCTCTCTCAACAACAGCTGGATGATGGTGCCAAAGGAGGTTTCTTTTCACTGTTTTCAGCCCGGGAAGGATTGAATCAGCTCAAGGAGAAATGGAATGAAGGTAAGCGGCCGAGAACACTGAGCAAGTGGGCGTTGCTTTTTGTCTCTCCACGAGGTGATTATGTTGCTGTAGCAGTCCGGAATCGGATTACAATCTTCCGCAAGGATGACAATTACATGGATCCATGTGGAGTTTTTACTAGTAATGATAGGCGAAATATTTTCACTCATGGAGCTTGGTCGGATTCCCATGGTGTTCTGGGAGTCATTGATGACATGAATACACTCTTT…	2418	MQETVREVLFETRQHATQSFSPDLSQQQLDDGAKGGFFSLFSAREGLNQLKEKWNEGKRPRTLSKWALLFVSPRGDYVAVAVRNRITIFRKDDNYMDPCGVFTSNDRRNIFTHGAWSDSHGVLGVIDDMNTLFFIKSNGEEITRMTKRQLKTPAQIIGLIVREDLDAKSSCLCGFNILMSDGLLHHVEVSQDLSASISYMSASSNRTTLLKQFPKNVSCIDFHPEFSMLVLVGGVDCVLENSGGFYFLHLWRVTKNSGLELMFCSPHFEGLFSTPRGYVTHFTTPKVAISPLGKYVAALDLTGSLDIFNVDSELYSLSIFASGKKCDSQRADNLLLGRGEFLNDIVDFTWWSDHVLVIAKRSGLVTMFDILGGMKCLENDRVFSMPILERVRQCQGCVF…
	115	UN000251	3819	ATGGATACTGATAATTATAGCGCCACCAAGATTTCTTGTATAGTGCCTCGGCTGTTCCCATCCCTTGGACCTGCCCTTCTAATTTCTATGGGATACATTGACCCTGGGAAGTGGGCTGCAGCTGTTGAAGGGGGAGCTCGTTTTGGGTTTGATCTTGTTTTACTGGTGCTTGCTTTCAATTGCTCTGCCATCTTCTGTCAGTACATTTCTGCTTGTGTTGCTGTGGTCACTGGAAAAAATCTTGCACAGATTTGCAGCGAGGAATACAATAGGCCCACATGTATATTATTGGGTGTTCAAGCAGAGCTATCAGTGATTGCTTTGGAACTAAATATGATTCTAGGAATTTCATATGGGCTCAATCTTCTTTTTGGTCTGGACATGTTCATATGTATCCTT…	1273	MDTDNYSATKISCIVPRLFPSLGPALLISMGYIDPGKWAAAVEGGARFGFDLVLLVLAFNCSAIFCQYISACVAVVTGKNLAQICSEEYNRPTCILLGVQAELSVIALELNMILGISYGLNLLFGLDMFICILLSASDAVLFPFLTALMDKCKTEMLFISAAGLALSFYVIGILTNQPEIPLIVDEIFPRLKGESAYTLMSLLGASIMPHNFYLHSSIVQQQQQWQRLRSISTGTFCHEHLFAIMCIFSVIFLVNLVVMLSAATVFHSAGLPVSFQDIPFLLDQILRSPMAPFAFFLVLFFSSQVTTLTWNIGAQVLVHDFFEITPPVWIHRATIKSLAIVPALFCAWNSGAEGIYQLLIFSQVILALLLPSSVIPLFRVASSGLIMGVFKLSHFMEIL…
	116	UN000259	126	CCCTCGCTTTCTTGGCCGGAACACCCGCTTCCCTCTCCCAACAAGAGTCAAACCCTTGTGTCGAAAGTTTATCGGCTAAGTCCTTTAAACGCATTTGCGCGCAAGCCCCGCATTTGAAGACTAAAG	42	PSLSWPEHPLPSPNKSQTLVSKVYRLSPLNAFARKPRI*RLK
	117	UN000262	735	GATCAAGCTCGCAGAAGAGGATCAGACGAAGACCTCCTTCATCACGCAATGGGGACTTTCTTTTACAAAGTTATGCCCACAAAAAGCCTCAAAAACGCTGGGGCAACATATCAAAGAGCCATGACAGCCATCTTCCATGATCTTATGGGAGACATCGTTGAAGATTACGTTGATGACATCCTTGTCAAATCAAAGACTGCAAGTCAGCATATTCAACACCTGGAGAAGATCGCGGAGCGATTATTGCAGTATCAGCTGCGACTTAACCCTCAGAAGTGTGTGTTTGGAGTCTCATCAGGCAAGCTCCTAGGGTTTATCGTTAGCAAGCGAGGTATCGAGGCTGATCCGATCAAGATACGCGCCATCATCAACATGCCGCCACCGCGCAATATCAAGGAG…	245	DQARRRGSDEDLLHHAMGTFFYKVMPTKSLKNAGATYQRAMTAIFHDLMGDIVEDYVDDILVKSKTASQHIQHLEKIAERLLQYQLRLNPQKCVFGVSSGKLLGFIVSKRGIEADPIKIRAIINMPPPRNIKELRSLLGQLQPLRRFISPPSKYLV*IYEPTTQEECRRSKCQEDFRKLKMYLMNAPVLSPPVPGRPLLIYVSITETALGAEIAQHDDTRQKERAIDYLSQTLLDYETRYTQIEK
	118	UN000266	7743	TCTAAGGCGTTACGTGATTTACCAAATCGAGTACTTTCTGTTCCTATGGAGGAGAGATCTGATTTGTTCAGAAATGTGTCGTCCGTTCTTAACAATCCTGGGATAAATGATGCAATTGTAAGGGGAATATGTAAGGTCATTGGTACGACATTGACAAAATATAAAGACTCGTCATCTCAACTCCTTGTTAGAAATCTTATTGTGGAAATCATTAAACGCCACCATGACGTGGCTGTGGAACACCTGATTGGAGTAATAAAAGCAGTTTTAAGCAAAGACCTTTCTGGGATACAGCCACAAAAATCGGCCAAATACTCATTGATTGTCTTAGGTTGGACGGACCTGATAACACGGCACGCCGATTTCAACTCAAACATCTTTAGAACAGAATATCCGAAA…	2581	SKALRDLPNRVLSVPMEERSDLFRNVSSVLNNPGINDAIVRGICKVIGTTLTKYKDSSSQLLVRNLIVEIIKRHHDVAVEHLIGVIKAVLSKDLSGIQPQKSAKYSLIVLGWTDLITRHADFNSNIFRTEYPKLVDYQSQLYQHIYLSFNTRIIEMGEKIFFDSWQNLEIYGLCFSTAIAKEPASNIVIFLMLLLRFDKSYDIENRINKCKSELLDHFVKGIITSKTKLPESFVIACRPLLQVLTQSDYEENILPVLQKSILRNPEVAIKTMGLVLHELNIDLSKYVESLGKVLLQNLYCKDDTARHESLQSLKELSQKCATVESIEYLLNGIFAILNGENGKITVAEYRMNLIQGAGYLSFNSISSSKTSTLLHLVVDLFSKALASEIQERVICHTLD…
	119	UN000271	1443	ATGAGTTGTAGGGAGGGACTTATGTCACCAAAAACAGAGACTAAAGCAAGTGTTGGATTCAAAGCTGGTGTTAAAGATTACAAATTGACTTATTATACTCCTGACTATGAAACCAAAAGTACTGATATTTTGGCAGCATTTCGAGTAACTCCTCAACCCGGAGTTCCACCTGAGGAAGCAGGGGCTGCGGTAGCTGCCGAATCTTCTACTGGTACATGGACAACTGTGTGGACCGATGGACTTACCAGCCTTGATCGTTACAAAGGACGATGCTACCACATCGAGCCCGTTGCTGGGGAGGAAAGTCAATTTATTGCCTATGTAGCTTACCCTTTAGACCTTTTTGAAGAAGGTTCTGTTACGAACATGTTTACTTCTATTGTGGGTAATGTATTTGGG…	481	MSCREGLMSPKTETKASVGFKAGVKDYKLTYYTPDYETKSTDILAAFRVTPQPGVPPEEAGAAVAAESSTGTWTTVWTDGLTSLDRYKGRCYHIEPVAGEESQFIAYVAYPLDLFEEGSVTNMFTSIVGNVFGFKALRALRLEDLRIPPAYSKTFQGPPHGIQVERDKLNKYGRPLLGCTIKPKLGLSAKNYGRAVYECLRGGLDFTKDDENVNSQPFMRWRDRFLFCAEAIYKSQAETGEIKGHYLNATAGTCEEMIKRAVFARELGVPIVMHDYLTGGFTANTTLAHYCRDNGLLLHIHRAMHAVIDRQKNHGMHFRVLAKALRMSGGDHIHAGTVVGKLEGERDITLGFVDLLRDDFIEKDRSRGIYFTQDWVSMPGVLPVASGGIHVWHMPALTE…
	120	UN000272	2238	TATTGTCATGACAACGGTATTCTTCGGCAAATGACCTGTCCGGACACTCCTCAGCAGAATGGAGTTGCCGAAAGAAAGCTTGCCTATCTAACTTCAATCTGTCTTTCATGGCTGCATGACAAAAACCTTCCTCGAGAGCTATGGGCAGAAGCTTTCCAATGTGCTTGTCATGTAGCTAACAGGCTGCCTTCTTGGCCAGGTACACAAAAATCTTCCTTTGAGATTGCATATGGTGAAAAGCCAAATGTAAATTACTTTCGGGTATTTGGTTCCATTTGTTATGTCCATATTCCCAAATCAAATAGAACCAAACTTGACCCGAAAGCACGAAAATGCGTGTTTGTTGGCTATGATTCTCACAGGAAAGGTTGGAGGTGTATGGATCCACAAACAAAGAAA…	746	YCHDNGILRQMTCPDTPQQNGVAERKLAYLTSICLSWLHDKNLPRELWAEAFQCACHVANRLPSWPGTQKSSFEIAYGEKPNVNYFRVFGSICYVHIPKSNRTKLDPKARKCVFVGYDSHRKGWRCMDPQTKKFTTSRDVVFDEISSFFSIQKVVLDDDHVNLEHLFPKEIVQAPFNGEIESEPPVQNDVEQDVSEQQVVRRSTREKRHPNYLKDYEVELNNCSVTSCFFTGVLTSEEPTSYDEAQSCPNWQKAMLEEIEALHKNETWELVPKPENCEPITCKWVFRLKKKLDGTIDKFKARLVARGFSQNYGLDYEETFSPVAKMATVRTLISLAAFKGWKLWQLDVKNAFLYGDLDRQVFMEQPIGFVSKQFPNYVCCLKKALYGLKQAPRAWYGKV…
	121	UN000274	7074	ATGTGGAACAACAGCGGCATGGCGCCGCCGGGGACCGGAGGGTCTAGTAGCATGGCTCCGCCGGGGACCGGAGGATCGTCGGTGTTGCCACCGCCGATGCAGCCATCGTACAGCATACCGCTCTCTCCGGCGGAGCTGGAGGCGCGGCTGGAGGAGAGGGCACGCAAGTGGATGCAGCTGAATTCCAAGCGCTACGGCGACAAGCGCAAGTTCGGATTCGTCGAGGCACAGAAGGAAGACATGCCTCCCGAGCACGTCCGCAAGATCATCAGAGACCATGGAGATATGTCATCAAAAAAATTTCGTCATGACAAACGTGTGTATCTTGGAGCCCTAAAATTTATCCCTCATGCAGTATACAAGCTTCTTGAGAACATGCCAATGCCTTGGGAGCAGGTA…	2358	MWNNSGMAPPGTGGSSSMAPPGTGGSSVLPPPMQPSYSIPLSPAELEARLEERARKWMQLNSKRYGDKRKFGFVEAQKEDMPPEHVRKIIRDHGDMSSKKFRHDKRVYLGALKFIPHAVYKLLENMPMPWEQVRDVKILYHITGAITFVNEIPWVVEPIYLAQWGTMWIMMRREKRDRRHFKRMRFPPFDDEEPPLDYADNLLDVDPLEPIQLEMDEEEDSAVYTWFYDHKPLVKTKLINGPSYRRWHLSLPIMATLHRLAGQLLSDLIDRNYFYLFDMESFFTAKALNMCIPGGPKFEPLYRDMEKGDEDWNEFNDINKLIIRSPLRTEYRIAFPHLYNNRPRKVRLGVYHTPMIMYIKTEDPDLPAFYYDPLIHPITSASKVDRREKKVYEEEEEDD…
	122	UN000277	7416	ATGGCGATCGCTTCGGCTTCGATCCGATACGGAGGAGGAGGTGGAGCAAGCACAGATGCTCTCCATCGCATACTCTCTGATCTCTGCACCAGAGGAACTCCAAAGGATGGTTCTGCATTAGCACTAAGAAAACATGTTGAGAAAGAAGTGCGTGATCTCAACGGAGAAGCTTTTTCACGTTTTATGGATCAGTTATATGACCGTATTAATGGCCTTTTAGATAGTAATGATGATGCTGAAAACTTGGGGGCTCTACTTGCTATCGATGAACTGATAGATGTGATGCTGGGGGAGAATGCCTCAAAGGTTTCAAGATTCTGCAATTATATGCGCAACGTGTTCGAGGTAAAGCGTGACCGTGAAATCCTAATTCTTGCAAGTAAGGTGCTAGGCCATCTT…	2472	MAIASASIRYGGGGGASTDALHRILSDLCTRGTPKDGSALALRKHVEKEVRDLNGEAFSRFMDQLYDRINGLLDSNDDAENLGALLAIDELIDVMLGENASKVSRFCNYMRNVFEVKRDREILILASKVLGHLARAGGAMTADDVERQVRTALSWLHGERVEYRRFAAVLILKEMAENASTVFNVHVPEFVDAIWVALRDPTLAIRERAVEALRACLQVIEKRETRWRVQWYFRMFEATQDGLGRNAPVHSIHGSLLAVGELLRNTGEFMMSRYREVADIVLKYLEHRDRLVRLSITALLPRIAHFLRDRFVTNYLKICMEHILAVLRIPAERASGFIALGEMAGDVDGELVQYLPTITSHLRDAIAPRRGRPSLEAMACVGNFAKAMGSAMEPHVRGL…
	123	UN000278	6888	ATGCAAAGGTTTTCTGCTGCCAGCTACGGTGGTGGAGTTAATAACAGCGCTGTTGGTGGGACATCTTCCAGGGACACTGCCAGAGCAGATTCATCTTTCTCGTCATCAAACTTCTCACTGAGTTCAAGGCGCTCGTTGCCACTTACACCATACAAGCTCAAGTGTGATAAAGAATCTCTAAATTTCCGTCTTGGCCCACCCGATTATTATCCTCAAACATCGAATTGTCCGGAAGAGACACTAACCAGGGAATATTTGCAAGGTGGATATAAGGAGATTGTTGAGGGAATCGAGTGTTGCATGTTATTGCATCATTTCCTCTTCTCCATTGGTATGAGAGAGTGTGTCCTAAGGATTGAAGACTATACAAGTAGTGTAATAGCAATTTGGGGAATCTAA…	2296	MQRFSAASYGGGVNNSAVGGTSSRDTARADSSFSSSNFSLSSRRSLPLTPYKLKCDKESLNFRLGPPDYYPQTSNCPEETLTREYLQGGYKEIVEGIECCMLLHHFLFSIGMRECVLRIEDYTSSVIAIWGI*RDCFILCCIFDDG*YRQMQRGNSETSQGYQ*ISSSKAQGWPSLWSSSLRTIIKQIWCFS*TKKLW*RF*EEMDRGFVTTS*EIAFFGRACSSWF*EETSF*SSN*T*CSVAEGNLVY*SYLS*SGSSHLLQRFFGNSRQNTFGPY*AVDKGCY*VFAVPLRGIHFTFVWEGSIISNTSGFSCTTERWFTASHCRW*GAYLAVQMEVHGSHFTMAPSRRAAFLFSHY*VGSQPATGQGIS*CATASFANRI*CD*FDCVITDVCADA…
	124	UN000282	2340	AGAAACACCTTAGCAAATAGAAAAAGATCCATCTCACCAGAAAGTTCGAAGGACAAATACAAAGCTTTGCGGCGGTCTCCATCACATGAAAATTACCATGATGAACCACGTTACCACAAACGCTCAAGGTCCCGTGATCACACAAGAGAGAGGAGCTCCTTGTCCAGAGATGTTACTCATGATAGGGGATTTACATTGACAGTTCATTCTCATGAGCAGAGCTCAAAGTCTTACAGAGATGATAATGATCGAGAAAAATGTTCTGATTCATTGGAGAATATAAAAAATGATTCCGATTCTGAAAGAGGTGTTAGACGTGATAGGGAAGATCGCCATGACAGAAGAGATCGGTCAGACATTGATAGAGTGATACGTAGGGAGAGAGAACGCAGTCGTAGT…	780	RNTLANRKRSISPESSKDKYKALRRSPSHENYHDEPRYHKRSRSRDHTRERSSLSRDVTHDRGFTLTVHSHEQSSKSYRDDNDREKCSDSLENIKNDSDSERGVRRDREDRHDRRDRSDIDRVIRRERERSRSYSRHDSREDRHGSRDRDIDRHRDKEWNREREMDRQRVRESESDRIREKERDRDRGRDRERYRDRDREMDENRISRHYKYGGVENSRLGRERYNDSRHTKYDESEHHRDKSRLTESNKEPSSSRHVLEEGKDTRDDEEEDYEERVMMKLVEQEEEDIDRIKEESRKRRQAILEKYKPQQSQLQSEPHSDDSGKEEKASSVDEKPGEHSSSPNPVANAVSKVLPDAIVNKREFSDADVADASFTIGKSPSQNGNSTPERNPGAGGLGD…
	125	UN000287	651	CTTTGGCACAGAAGGCTTGGACATCCGAGTCATCAGCGACTTTTGGAGATGAGTCGTTCCATTCCTTTGTCTAGTAGTCAGTCTTTCCTTTTCAATAAAGAGCATTTGTGCTCTACATGTCAGTTGTCTAAGAGTCATAGGTTGCCTTTTCCTAACAGTGATAGTCGTTGTAAAGAGTCTTTTCATTTAGTTCATTCTGATGTCTGGGGACCATGTCCTGAACTCTCTTTTAATGGAATGCGAGACTTTGTTACTTTTATTGATGATCATTCTCGAGTGGTTTGGCTTTACTTTTTGAAAAAGAAAAGTGATGTCTTGTCTGTTTTCAAATCTTCTTAAAAAATTGTTTTGACTCAATTTGGAAAAAGAATCAAAATCTTTCGTTCTGACAATGGAACT…	217	LWHRRLGHPSHQRLLEMSRSIPLSSSQSFLFNKEHLCSTCQLSKSHRLPFPNSDSRCKESFHLVHSDVWGPCPELSFNGMRDFVTFIDDHSRVVWLYFLKKKSDVLSVFKSS*KIVLTQFGKRIKIFRSDNGTEFTSKDFEEYFTSVGIIHEYSCPYTPQQNGVAERKNRNILEVTRSLLLEMNVPKRFWSEAVMTAAHLINRMNSFYMALEVLLGR
	126	UN000288	4632	ATGGCACCTGATACTCGTGCAAGTAGGAAATTGAAGGATGAAGAAAGCAACATCTCAAAGAATCACAATGGTGGCAAATCAAAGGATTCCAGTGAGAACCCTAATGCTAAGGATTCCAGTGAGACCTCTAATGCCAATGCTGGCTCTACAACAAAGGGGACATACAGCCTGAGAAGGTCTGTCAGAGAAACACCTTCAAAGAAACAGAGGTCCTCAAGTCCTCTAGGGACACGTAAGTCTGAGAGACATGAGAATCAGGTTTCACCTACTCCAGTCAATAGGAAGTCAGAGAGGGTCCAGAAGAGAAGAGTGCAAAATCTACAAAGTAGGTCAGAGAGAGGTGAGAAGCACCCCTCTTTGAGGAGTTCATCCTCCAAGAAATCTGCGAAGAGTTCAAGT…	1544	MAPDTRASRKLKDEESNISKNHNGGKSKDSSENPNAKDSSETSNANAGSTTKGTYSLRRSVRETPSKKQRSSSPLGTRKSERHENQVSPTPVNRKSERVQKRRVQNLQSRSERGEKHPSLRSSSSKKSAKSSSSLGTKRKTVNKGKSGKQVATGAGEQRKREKQDTLADVVLKNKKRLDARRYRELLKPLGKNVKQPELGKKRKREENSSHKDAPDGRKETKGDANKCLKEIKGAANKSLRKKEDELAKEIKGAANKRLRKKEQGSAKDIMGGAKEEPRGKRLRKLGEEIVESYSSGFVRDDLPRTSECTLCTSELWPPMSDVILDTHGQDVALKDGDKVSMREDLPPTSDCMLAEPCPASSDAILERVERLGYDSQHQEVSCNTRNNDLFDISLSKQE…
	127	UN000295	3204	ATGTTCCGGGATGGAAATGAGGGAATGTATACAATACCAGGGTTTAGTCAGATACAATTTGACGGATTTTGTAGGTTCATTGATCAAGGCTTGATGGAAGAACTTCATAAGTTTCCAAAAATTGAAGATACAGATCAAGAAATTGAATTTCAATTATTTGTGGCAACATATCAATTGGCAGAGCCCTTGATAAAAGAAAGAGATGCTGTGTATGAATCACTCACATACTCTTCTGAATTATATGTATCCGCGGGATTAATTTTGAAAACCGGTAGAGATATGCAAGAACAAACCGTATTTATTGGAAATATTCCTCTAATGAATTCCCTGGGAACCTTTCTAGTAAGTGGAATATACAGAATTGTAATCAATCAAATATTGCAAAGCCCCGGTATTTAT…	1068	MFRDGNEGMYTIPGFSQIQFDGFCRFIDQGLMEELHKFPKIEDTDQEIEFQLFVATYQLAEPLIKERDAVYESLTYSSELYVSAGLILKTGRDMQEQTVFIGNIPLMNSLGTFLVSGIYRIVINQILQSPGIYYRSELDHSGISVYTGTIISDWGGRLELEIDRKARIWARVSRKQKISILVLLSAMGLNLREILDNVCYPEIFLSFLNHKEKKKIGSRENAILEFYQQFACVGGDPVFSESLCKELQKKFFQQRCELGRIGRRNMNRRLNLDIPPNNTFLLPQDVLAAVDHLIGMKFGMGTLDDMNHLKNKRIRSVADLLQDQFGLALVRLENAVRGTICGAIRHKLIPTPHNLVTPTPLTTTYESFFGLHPLSQVLDRTNPLTQIVHGRKLSYLGPG…
	128	UN000298	6072	TTCTGGATTGCAAAGGAAGTTCGATTTTGTTACAATGTGTAGGTTTGAAGTCTGAGGAGGGGATCAACCTCGCTNTCGGATGGATCCCCTTGTTCATGGGGGAAGGCCACCGATGCTTCTAGATTAGATGAGCATTCAGATCTAATTTCTGCTGAAAGTTCAGAAGGTGTACTTCCTTTTATTGTCAAAAAAACCCGTGCTGGTTCAGTNNTCAGATGGAAAAGGGGGGTGCCCAAAGATCTGATGATGGGTTGCGTCAACCTTTTGATCAGGTTCTGAAGGATTCAGTGCCTGGACCGCCCAAATTGCGTTGTCATGATTTTACCCAAGATGTAAAGGAGGTATCTGTGTTGCCTATTGGTCATAGATTCAGTAGCGCTTCTGACCGAATCCTGGAAG…	2024	FWIAKEVRFCYNV*V*SLRRGSTSLSDGSPCSWGKATDASRLDEHSDLISAESSEGVLPFIVKKTRAGSVXRWKRGVPKDLMMGCVNLLIRF*RIQCLDRPNCVVMILPKM*RRYLCCLLVIDSVALLTESWKNHSPL*FRHRNLLHPLIREKRFLMEVSHMVLQKSVFPT*QNNLALLLSRSRQMKCRG*IML*MYLQMEIKQLDLSRG*QLAI*FLHGSEKRV**DL**RVEWIFSQNF*EIPFYPCYGVHFSYIGC*VHLCPKSIF*CCSGSFIFNFSSEILY*FFVKT*RGSHEILFR*SVEWSMWRNKGG*PSSE*YLFE*SICSMFEIVTFLCKSYILYFKHKCDRGNQNM**TRKANTSRGKPPI*CWVP*AF*WTFERFPFCSTSNILNLF…
	129	UN000303	7587	ATGGACAAAGACATCCAACTCCTCTCGCGCGTGGTCGTAAACCACCTCTTCCTCTCCCAATTCGAAGCCTTCCGAGCCTCCCTCCTCAGCCTCTACAAGAGGAACCCTAGCCTCGCCCTCTCCATCCTCCAGACCGTCGTCGCCGGCGCCGACCGCTTCCAAGGCATCCTGTGGTCGGCCTCCTGCCCCTCTCCCTCCCATCTCGCCTGGCTATCCTCCCTCGAGCTCCTCCGCTTCGACGATGTCTCCGCGACCTGGAATCTCGACCCCGAGATCTTGCGCCTGAAGGTAGAATTTCTTCTCCTGGTCCAAATCGTCTCTTCTAGGGTTTCCGAAGACCTCCGAAGGTTCCTAGACCTGGAAAGCATCGAGAAAGAAGAAGGCTTCGATGGAGATTTC…	2529	MDKDIQLLSRVVVNHLFLSQFEAFRASLLSLYKRNPSLALSILQTVVAGADRFQGILWSASCPSPSHLAWLSSLELLRFDDVSATWNLDPEILRLKVEFLLLVQIVSSRVSEDLRRFLDLESIEKEEGFDGDFESRPEDLADGTNLAETSGGLVDSVNLLDRISDLGFRRLKEDIADDVAHSDPVFSFTDTELKCLRKVFLDQQEILDALCLNIQKQLSWSDPFDSGLAISMRAEVKESSASVLPSEEDSKALTWIQQNVQIAHLDGLKDCMKEGDDVSAISHLRFLHLDSGVEESEYRMVLLDIIRRAWSQRNGFGDTWHSFRHKMLSMYGEALSSSCTELAQMIQIIQDELLSEEIELHRASDANFTPPPLQQLQKHFGASNLESATDVDERTAQSM…
	130	UN000313	1533	ATTGCCATCTTAGTCACTGCCATGGCTGGCATCGCCCTGGCCGCCACTCTCGTCTACTCCCGCAGGGGAAGTCTCAAATCTCCATGGTCTCGTCAGAGAAGAAAACTGGCCCTTTCCCCTCAACAATGGAGAAGCATGTTCACACCAGATGGGAAATTCCAAGATGGTGGAGTGAAATTCCTGAAAATAGTTCGCAGCGGTGGCATTGAGCCTAGCATAAGGGCTGAGGTGTGGCCTTTTCTCCTCGGAGTCTATGACCTTAACTGTTCAGAGGCAGAAAGAAATGCCATTAAGACACAGAAAAGAAAAGAGTACGAGTACCTGAGAAGAGAAAAGCATCGAGTCTCAAGACAACATGACAAGTCTTGTAAGGTCAATCGAANNGTTGATTGTGGCAAT…	511	IAILVTAMAGIALAATLVYSRRGSLKSPWSRQRRKLALSPQQWRSMFTPDGKFQDGGVKFLKIVRSGGIEPSIRAEVWPFLLGVYDLNCSEAERNAIKTQKRKEYEYLRREKHRVSRQHDKSCKVNRXVDCGNGEGCRIDKNPDSPGSKGVASTRQPRPIDEVIPDHEEKDHPXHEEASRTVMEEEEKSVITQAGTSAVYTESSDTDSIEESTSPQMPHYAEESEENDPSNTKSNSVKGNSSKAFKDEDFTTWQRIIRLDALRANAEWVVFSPTQATVSEGQARRLASDVGLEDYDHLEPYSVFHAARLVAILEAYALYDPEIGYCQGMSDLLAPIITVMEEDYDAFWCFVGFMRKARHNFRLDEVGIRRQLNTVSKILKSKDSQLFRHLEMLQADDCF…
	131	UN000314	1440	TCTCAGTGGTTCAATAAACCGTTTGAGAGTGGTGGTGATAATTCACCTGATGAAGCATTGCTATCTGAGGAGGAGAACCTTTTAATTATAAATCGTCTTCACCAAGTCCTCCGACCTTTTGTACTTCGGAGATTGAAAAATAAGGTCGAAAATGAGCTGCCTGAGAAGATTGAGCGACTGGTAAGATGTGAGGCTTCTGCTTATCAAAAGCTTTTGATGAAGAGGGTCGAAGATAATCTTGGCTCTATTGGAAATCCAAAGGGCCGCTCGGTGCACAATTCTGTCATGGAGTTACGCAATATATGCAATCATCCGTATCTTAGTCATCTTCATTCAGAGGAGGTTGATAGCTTGATACCCAAGCATTATCTGCCACCACTTGTGAGACTTTGTGGAAAG…	480	SQWFNKPFESGGDNSPDEALLSEEENLLIINRLHQVLRPFVLRRLKNKVENELPEKIERLVRCEASAYQKLLMKRVEDNLGSIGNPKGRSVHNSVMELRNICNHPYLSHLHSEEVDSLIPKHYLPPLVRLCGKLEMLDRLLPKLKATDHRVLFFSTMTRLLDVMEEYLSWKRYRYLRLDGHTSGNERGALIEEFNRPDSPFFIFLLSIRAGGVGVNLQAADTVIIFDTDWNPQVDLQAQARAHRIGQKREVLVLRLETVRSVEEQVRAAAEHKLGVANQSITAGFFDNNTSAEDRREYLESLLRECKKEEAASVLDDDSLNDLIARSESEIDIFESVDKARREEEMSAWKRLQGMSKDGSESSIPFPSRLVTDEDLKAVYSVIQINEASKVSAKRRSGY…
	132	UN000317	6873	CTCTCCATCGATCTCAATGAGATCCCATCTCCGCCACAGCTCGAAACCCCCGCTGCAGTCCCCGCCCAGCCGCTAGATGTGATGGAAGTCGTTAGGAGGTTCCACGGCGACCCGCAGCCCTTCCCTGGGCAGCCTGCGCCTTTTCCCGGAGAACCCGGTGTGGGAACCACATCCCTCTGTGTGCTGTGCTCACTGCCGGAGACATGGGGCGGGACTGTAGTATGCGATGGGTGCGAGCGCGGGTTCCACCTGAGCTGCGTCGGGTTCCGGCTTGGGGCGGTGCCCGCCTCCCAGGAGTGGGTGTGCGACCCCTGTGCGAGGAGCAGCGGCCGGAGCAAGCGCTGGCCTTTGGGACCTGTGCGCGGTGGGCAGAAGCTCGATGGGGTCCGCCTCCTCGAC…	2291	LSIDLNEIPSPPQLETPAAVPAQPLDVMEVVRRFHGDPQPFPGQPAPFPGEPGVGTTSLCVLCSLPETWGGTVVCDGCERGFHLSCVGFRLGAVPASQEWVCDPCARSSGRSKRWPLGPVRGGQKLDGVRLLDINASPPSDGDGEGSEEMQSGRMHAPDEDSFSGISSSVETQSSDLGCPGNVFDPGNEPGMAISTAKSGLEELVPHGLIASSFEDAASSTPSGGKPISNITTQPEKFLRALREYILERQGVLGEGWYVEFKQTTNNSADPIYCSPDGKKFESMPEVAYYLGLVSNCNSMDIENRNNGTALLQTGSPMRRRRRKELARLSRVNSLTENQDGIRNLGGAEISSGVETLNPPSCDLKSDNRVTEAGLQEKSCSGSHHLNIDFPVQYEDFFL…
	133	UN000321	1344	GACATTGGTCTCTCATGGAGGCAATGGCATTGGTGTGAACTGGGGGAATTTGGCTTCGCATCCCCTGCCAGACGACGTGATTGTTCAGATGTTGAAAAATAATGGTTTCACAAAGGTGAAGCTGTTTGAGGCAGATGAAAAGAGCTTGACAGCCCTCTCTGGGAGTAACATTGAGGTGATGGTGGCAATACCAAACAACATGTTGCAAAAAATGAGCGACCCTAGCGCAGCCACTGATTGGGTTAAAGAGAATGTGACCAGATATANTGAAACTGATTGAGAAGTTATGCTCGTTTCAGATATGTTGCAGTAGGCAATGAGCCTTTCCTCCAGTCCTACAATGGCACCTACCAGGATATCACGCTCCCGGCCCTGAAAAATGTTCAGCAAGCCCTGACC…	448	DIGLSWRQWHWCELGEFGFASPARRRDCSDVEK*WFHKGEAV*GR*KELDSPLWE*H*GDGGNTKQHVAKNERP*RSH*LG*RECDQIX*N*LRSYARFRYVAVGNEPFLQSYNGTYQDITLPALKNVQQALTKAGFGAQIKATIPFNSDIYDSPASNPVPSAGDFRAELHNLTIQIIEFLSENNAPFTVNIYPFLSLYYNEHFPFDFAFFDGSDNPIKDKDVIYNNAYDANLDTLVWALKKAGYPDMPIIIGEVGWPTDGAKHANVSVAQRFNQGLLRHILRDKGTPMRNSTPDVYLFSLIDEDAKSIAPGNFERHWGLFDYDGKPKYELDLSGHAEKKALEGAKGVQYLPRRWCILNPRAADLSKLQDSVGYACSQSDCTALGTDTSCSNLDGHGNA…
	134	UN000322	300	CTACTGAATTATGATGCTAGACCATATATACCGACTTCGACCATTACAGATAATTCAGCAGATAACTCCAATGATCATTTATCAGTGCATTTACAGCAGCTCGGCGAAAGGCTTTTTCCAAAGATTTATTCAATAAATGCTACCAATGCGTCCAAAATAACTGGTATGTTGCTTGAAATTCCGACCCCCCAACTCCTATCTATTTTGTCCTCTGAAGATACTCTAAGACAAAAGATTAACGAAGCTCTTGATATAATAACATATAAACAAAAATCAGAAGCAAATAATGCGTCAAATCAA	100	LLNYDARPYIPTSTITDNSADNSNDHLSVHLQQLGERLFPKIYSINATNASKITGMLLEIPTPQLLSILSSEDTLRQKINEALDIITYKQKSEANNASNQ
	135	UN000324	6798	ATGGCTGGAGTTTGGCGTGGAAATGGGTCCATAAACGGGAGGGTCCAAATCAGACCTCCAGCGGCACTGTTAGAAGTTGGTGATTTCTGCAAAGCTCTTGGTGGGAAGACACCTATCCACAGTATCTTAATTTCAAACAATGGAATGGCAGCTGTGAAATTTATGCGTAGTATCAGAACATGGGCATATGAAACATTTGGAACAGAAAAAGCCATTCTGTTGGTAGCAATGGCAACTCCAGAAGACATGAGAATAAATGCAGAACACATAAGAATTGCTGATCAGTTTGTGGAAGTTCCAGGAGGGACAAACAATAACAACTATGCTAATGTGCAACTCATTGTAGAGATGGCAGAAATAACACGTGTTAACGCTGTATGGCCTGGTTGGGGCCATGCA…	2266	MAGVWRGNGSINGRVQIRPPAALLEVGDFCKALGGKTPIHSILISNNGMAAVKFMRSIRTWAYETFGTEKAILLVAMATPEDMRINAEHIRIADQFVEVPGGTNNNNYANVQLIVEMAEITRVNAVWPGWGHASENPELPDALKAKGIIFLGPPASSMAALGDKIGSSLIAQAAGVPTLPWSGSHVKISSESCLESIPEDIYRQACVYTTEEAVASCQVVGYPAMIKASWGGGGKGIRKVHNDDEVRALFKQVQGEVPGSPIFIMKVASQSRHLEVQLLCDEYGNVAALHSRDCSIQRRHQKIIEEGPITVAPPETVKQLEQGARRLAKCVSYVGAATVEYLYSMDTGEYYFLELNPRLQVEHPVTEWIAEINLPAAQVAVGMGIPLWKIPEIRRFYGM…
	136	UN000330	6249	AGGCAAGAGCGCTTCATACGCCGAATTGTGGAGGGCTTATCAGACCCAAGGCTCACCCACGAGCTTCGTGCCATTTGGATCTCCTACTGGACTCAGGTTACTCTCATCTCTAGCATATTACCTTTGTCCTTTTTATCCCCAATGAATGTAGCTTCTGGGTACCTTTAGACCCTTTTGGCTTGGGGATAAATCTGTCCAGATTGAGATGATTTAGGTTCATTAAGTTAAGCTCTTCTTGGGCTGGACATAAATCTTGATAGTTCTATTCCTCCAATGGACTTATCCTTTATTAGCAGTAGTGGAACATATTTCAGTATATAAGTGATATTAGTTACCCAACATTGTCACATTTGAGGTAGGAACAATCAGAATGGAAACCTATCTAATGATAAATAGGCT…	2083	RQERFIRRIVEGLSDPRLTHELRAIWISYWTQVTLISSILPLSFLSPMNVASGYL*TLLAWG*ICPD*DDLGSLS*ALLGLDINLDSSIPPMDLSFISSSGTYFSI*VILVTQHCHI*GRNNQNGNLSNDK*ATKILIQYLNWSVNSPRN*VEPDWLAQ*LEIQDSMAHMDGTIYHFFTGINRLSIMVLGQLHVVLIVHEPRSPT*LERSLI*VTRWCLAHELVRLIRFAQLDALLN*INSVE*VLNHAQTPKSGPHFYNPAKQSYSGQG*IIVVPPIKPLGPLAANILT*SLLSELVHSIDSY*ASLMIISSLSNLCQCSVTGLWAKG*HLSSM*SRACDERWVTQNEEIKLHGWIHKFLPYNAWFLRRKRKKEGMKKSTFH*LLIGFHKCLCMIGLL…
	137	UN000332	1359	GGGCAACCTACTTACGTGACACATCCTCATCTTGTGAACGAAGGTGAACTAGTTATAGGCCAAAATGTGGAATCATTTCGGGAGCGCCGTTCTTGGCTTATGAGCGGCATTCAAAAGCTCGATGCAGAAGATGCGAAAAATGTGCAATGCAAAAAGAAGTCTCATTTGGTTATAGTACCATCATCGTCTAAGAAGTACATGAGCGATAAAATTCCTTACGTTTTTCGTCAAAACTCCGACTTTTATTACTTAACTGGTTGTCTGGAACCGGACTCTGTGCTGGTTATGACCATCAACGAGAACGAAGATGTCAAATCTACACTATTTATGAGGCCGAAAGATAAGCACGCCGAATTGTGGGATGGCACTCGTACAGGTGCTGAGAATGCACCCGATTTT…	453	GQPTYVTHPHLVNEGELVIGQNVESFRERRSWLMSGIQKLDAEDAKNVQCKKKSHLVIVPSSSKKYMSDKIPYVFRQNSDFYYLTGCLEPDSVLVMTINENEDVKSTLFMRPKDKHAELWDGTRTGAENAPDFFGVDEAYTIEQFSQVLKKYVTSEKPLVWYDSPASDQANITSEVQQVADKISEVKSPAVYIQSLRLYKSSSEQDLMRRTCQIASRAINEVIAESKPGISEHHLFASVDYKCRMKNASYLAYPPVVASGNNATTIHYINNTQLTRSGELVLMDAGCEYGGYTSDITRTWPIDGTFTPAQKILYDVVLQLQKELIATLLKPGGETLDNLFDTMCIKLGKYLQEAGLVPKNIVDDISYARAGYKFCPHHVSHYLGMDVHDTPLIPRTFPL…
	138	UN000335	6444	ATGGAGGGAGAAGAGGGCCGTGTTGAGTTGGCGTGCCTTGTTTCGGCGGTGCTTTTCTCTGTTTTGAGTTCTCTATCATTTTCCATACTCTGGGCTGTAAATTGGCGTCCATGGCGGATTTACAGTTGGATCTTTGCCAGAAAATGGCCAGAAATTCTGCAGGGCCCTCAGTTAAGTGCAATATGCACTTTTCTGTCTGTTTCTGCATGGGCTATTGTTCTCTCTCCAATTGCAGTTCTTATCATTTGGGGGACGTGGTTGATTTCAATCTTGGATCGAGATATTATAGGGCTGGCTGTCATAATGGCTGGTGTTGCACTGTTGCTGGCATTTTATGCTATCATGCTTTGGTGGAGAACACAATGGCAAAGCTCAAGAGCTGTCGCTATTCTTCTTCTT…	2148	MEGEEGRVELACLVSAVLFSVLSSLSFSILWAVNWRPWRIYSWIFARKWPEILQGPQLSAICTFLSVSAWAIVLSPIAVLIIWGTWLISILDRDIIGLAVIMAGVALLLAFYAIMLWWRTQWQSSRAVAILLLLAVSLLCAYELCAVYVTTGSSASERYSPSGFFFGVSAIALAINMLFICRMIFNGTGLDVDEYVRRSYKFAYSDCIEVGPVACLPEPPDPNELYTRKSSRASRIGLLYLGSLVVLLVYSILYGLTSKEAHWLGAITSAAVVVLDWNMGVCLFGFELLQGRVAVLFVAGTYRIFLICFGVDYWYLGHCISYAVVASVLLGAAVFRRLSVVNPLAARRDALQSTVVRLREGFRRKGQNSSSSSSEGCGSSAKHSSSIEAGQLASGTDAM…
	139	UN000339	5403	CATCAATGCAAATCCNNATCATCANNCCCGCTTCTCTTCTCCATCTCCTCACGCTCCATCTCCATCTCCATCTCCTTCTCNCTTCTCCCCAAACGGACTCTCCCATCTTCCCCACATCCAAAGAAAACCAAATCCCCGGCCCCGTCCACGACGGCCCCACCCAGCTCTCCCTCGCCGACTCCGACGCCGTCCTCCGCCCCCTCATCAATGCCGCCTCCTCCGGCGTCCTCAAGATCGCCGAGCCCGCCGTCGACTGCATCCAGAAACTCGTCGCCTACGCCTTCATCCGCGGCGAGGCCGATCCCTCTGGCGGCCCCACCTCCACCCTCCTCTTCCGCCTTATCGAGTCTGTCTGCAAGTGCCACGAGCTCGGCGACGACAGCCTCGAGCTCACGGTCC…	1801	HQCKSXSSXPLLFSISSRSISISISFSLLPKRTLPSSPHPKKTKSPAPSTTAPPSSPSPTPTPSSAPSSMPPPPASSRSPSPPSTASRNSSPTPSSAARPIPLAAPPPPSSSALSSLSASATSSATTASSSRSSRPSSLPSPPPISASTATASSRSSAPATTCI*AAGASSIRRPPRRR*FRCW*SSSGEWRPTRRPCRCSRLSLPS*WSRRGSPALTSASCRDSSPRSSRTSTSF*IRRCRWGREARTGCSSRRLWWRRQIRWIFWIPPIRTC*TPSTGKSACIRPHWKGGRGNWPTARMGPMIWRCRSGISCGGMGSWCSGRSASSR*RRLLKRHCPIRG*CVGRLLPWSF*RFCWRMPELSLGQVRGFWVPLSSIYVYHF*RTVPPPL*LFFSFLS…
	140	UN000343	2568	TATTCACGTGCCCCCGTCGGCCAAATTTGGGTCGAGAAGGTCGACCGATTGTTTTGCGCGCCAACCATTTTCAGGTGTCTATGCCGCGCGGCTATGTACATCACTATGATATCAACATTCAGCCGGATAAGTGTCCGCGGAAAGTGAATCGTGAAATTATCGAGACCATGGTGCATGCGTATAGCAAGANNTATTTGGAGTTTTGAAGCCAGTATTTGACGGGCGTAATAATTTGTATACACGTGACCCGCTTCCCATAGGCAACGATCGACTGGAATTGGAGGTAACACTTCCAGGCGAGGGAAAGGATCGTATTTTCCGCGTAACCATCAAATGGATGGCGCAGGTATCGCTTTTCANNATCTAGAGNNGAAGCCTTGGAAGGGCGCACGCGCCAAA…	856	YSRAPVGQIWVEKVDRLFCAPTIFRCLCRAAMYITMISTFSRISVRGK*IVKLSRPWCMRIARXIWSFEASI*RA**FVYT*PASHRQRSTGIGGNTSRRGKGSYFPRNHQMDGAGIAFXXLEXKPWKGARAKYRTMQYLL*MWLCGIYRA*HTRLWVXQFLQLTRWLLPSTGWRS*SLVWFPSKCTSLAMENDAKH*CFGHGFL*SAASY*FYV*ST*YPRY**AKETTHRFAACKIHQRN*RIENRNYPLWSYASQIPCLQCNTSSSTNAIISTST*KWPDCGVYRGQILLG*IPHETAISPFALSTSWAGA*AHLLASRSM*YSRRSTLYQKTD*HADIDDD*SYGSFSTRS*T*NQ*LG*ACGFQQRFLCSRIRFNYF*LYDGSARTCVTTPQTA…
	141	UN000345	6882	ATGGGTCGCCCCGAACCCTGCGTCTTGTTTGCTCAATCCTTCATCCATCCTCATCTCAATGAGTACGTCGACGAGGTAATGTTTACAGAACCCGTCGTGATTGCTTCTTGCGAGTTCATCGAACAGAATGCGTCTTCATCATCTCCAATGGTTACACTTAATGGGGCAACTTCACCTCCTTCCTTTGCTTTGGAGGTTTTTGTTCATTGTGAAGGGGAGTCTCGATTTAGGCGTCTCTGCCAGCCTTTTTTATATTCTCATTCTTCTTCAAATGTGTTGGAAGTTGAGGCCGTAGTTACAAACCATTTGGTTGTAAGGGGCACCTATCGAAGCCTTACCTTGGTGGTATTTGGGAACACCGCGGAGGATCTGGGGCAGTTCAATATTGAATTTGATTTG…	2294	MGRPEPCVLFAQSFIHPHLNEYVDEVMFTEPVVIASCEFIEQNASSSSPMVTLNGATSPPSFALEVFVHCEGESRFRRLCQPFLYSHSSSNVLEVEAVVTNHLVVRGTYRSLTLVVFGNTAEDLGQFNIEFDLDSSLANLVSSPSTGKLEDLPIALHITKSSFEESITPLKSLSPLKAEIDLSLEMNQFLHLTLKIWQISNLEDIFQRYYSVVVSVVSSYVASDLSGPTITWNQYMQDGTINCNKELQCVVSDARNELLGLYKRLQHASGNELGDTTSLELEAELTTPELLADVFNHCFLFKRKLPTNEVTLLSKNENLIIELSMVLLLVSGSESCFHFVNGGGMEHVVHLFSREAQRPMATTLILLGIVERATRHAIGCEGFLGWWPREDENVPIGSS…
	142	UN000350	444	AAAAAGGTAAAGACCGAGAATGATGTACGTCGTGAAGTACGTAAATGGGTGCTTAATAAGAGCGTTGGTCAAAGCACAATGCATAAAGCCGCACGTCTGGGATACATAGATGTTGTTGTTTACTGCTTGGATCGTATGGGGATGAATCCAGATCAGAAAGATAATGCTGGCTATACACCGCTACACGAAGCCTGTACAAAGGGTTGGCTTGAAATTGCTAGGATTCTTTTACAGTATGGAGCAAATCATTCTGAAGCGGCGCATTCGGGCATTCGACCGTTACATGAGGCAAGTGAAAACGACCACGAGGAGATTGTGCGTTTGCTGCTTTCTTATGGCGCTGATCCGTTACTCGCTACATATTCAGGCCAAACCCCTTTAATGCTTGCTTCAAGCACT…	148	KKVKTENDVRREVRKWVLNKSVGQSTMHKAARLGYIDVVVYCLDRMGMNPDQKDNAGYTPLHEACTKGWLEIARILLQYGANHSEAAHSGIRPLHEASENDHEEIVRLLLSYGADPLLATYSGQTPLMLASSTAMRDFLNNHLSDVQN
	143	UN000351	2937	CCACCCAAAAGTTTTCTTTTAGTTCAAAATGATCAATATGTAGAATCAGAACAAGTGATTGCTGAGATTCGCGCTGGAACATCCACTTTCAATTTTAATAAAGTTAAAGAGAAAGTTCGAAAACATATTTATTCTGACTCAGAGGGAGAAATGCACTGGAGTACCGATGTGTACCATGCACCTGAATATAAATATGGTAATGTTCATCTCTTACCCAAAACAAGTCATTTATGGATATTATCAGGAGCTCTGTGCAGATCCAGTATAGTGCCTTTTTCGCTCCACAAGGATCAAGATCAAATGAATGTTCATTCTGTTGAACGGAGATCTATTTCTGACCTCTCCGTGACTAATGATCAAGTGAGACACAAATTGTTTAGTTCGAATCCTTACGGTAAA…	979	PPKSFLLVQNDQYVESEQVIAEIRAGTSTFNFNKVKEKVRKHIYSDSEGEMHWSTDVYHAPEYKYGNVHLLPKTSHLWILSGALCRSSIVPFSLHKDQDQMNVHSVERRSISDLSVTNDQVRHKLFSSNPYGKKGGVLDYSGPDRIISNGHWNFIYPTILHENSDLLAKRRRNRFIIPFQSDQEREKELMPRSGISIEIPINGVLPRNSILAYFDDPLYRRSSSGITKYGTIGVGSIVKKEDLIEYRRAKEFRPKYQMKVDRFFFIPEEVHILPGSSPIMVRNNSIIGVDTRIALNTRSQVGGLVRVERKKKRIELKIFSGDIYFPGATDKISRHCGILIPPGTGKKNSKESKKWKNWIYVQRITPTKKKYFVLVRPVVTYEIADGINLATLFPQDPLQ…
	144	UN000353	5148	ATGGAGGTTGCATCGGCAAATTCTTGTGAAGAACAGGGGAAAATGCCTCAAGCTTCGATGCCCAGTAAACCATCTTCTGCCAATTTGATAGAAAGTGTTAAAAGAAGTTCAAACACTATGAAGTCTGGTGTTTTGTCAGCAGCCAAGGCTTCAGGATCCGTTGCTTCATCAAGGAAAAGAGCAGAAGGAACAGCAGTTTCAGATTCAAGTTCAAATGCGGTTAAACATACTCCGACACAACCATCTCCTAGCTCAAATGCAGCTTTGTCGAAGAGAAGAAACAGTACTGGAGGAGTGCTGGAGAAACAGTCAGCCTCAGTTGCTAAGCGACCTGAAGGTGAGGTGTNNCATTGAAAGAAAAACGGATTACNTCGTACACAGGAAACCGGCCTCTTGGAG…	1716	MEVASANSCEEQGKMPQASMPSKPSSANLIESVKRSSNTMKSGVLSAAKASGSVASSRKRAEGTAVSDSSSNAVKHTPTQPSPSSNAALSKRRNSTGGVLEKQSASVAKRPEGEVXH*KKNGLXRTQETGLLEKVDGHRCLRVAPKLQFQ*VYRKQKNRLPFHRQPGYHGHLQNLTPASKILLENLLLNLHYPFLLQREFLLHLWIVVAAAAIPGGQFLRSLLHWPVPLRLPVVQGLGHFHLPWTGALRLCQVVERHQLQTVEILAL*CFHRWRSKLGMM*GWILEVIESAVFVPVG*TYHQI*SLFTSGTTFCHRWRELRF*SE*RFLT*ALMILKDRALSRLRIANSFSNFILLGIKSHRL*AFLSFLIWSFSQLLKTG*SLFPWQVSLDCRY*LPA…
	145	UN000355	1527	GAGACACTAATGGTAACCATTCGAGCCGACGAAATTAGTAATATTATCCGTGAACGTATTGAACAATATAATAGAGAAGTCAAGATTGTGAATACCGGCACAGTACTTCAGGTAGGCGACGGCATTGCTCGTATTCATGGTCTTGATGAAGTAATGGCAGGGGAATTAGTAGAATTTGAAGAGGGTACAATAGGCATTGCTCTGAATTTGGAATCAAATAATGTTGGCGTTGTATTAATGGGTGACGGTTTGATGATACAAGAGGGAAGTTCTGTAAAAGCAACAGGAAGAATTGCTCAGATACCCGTTAGTGAGGCTTATTTGGGTCGTGTTATAAATGCTCTGGCTAAACCCATTGATGGGAGAGGTGAAATTTCAGCTTCTGAATCTCGGTTAATC…	509	ETLMVTIRADEISNIIRERIEQYNREVKIVNTGTVLQVGDGIARIHGLDEVMAGELVEFEEGTIGIALNLESNNVGVVLMGDGLMIQEGSSVKATGRIAQIPVSEAYLGRVINALAKPIDGRGEISASESRLIESPAPGIISRRSVYEPLQTGLIAIDSMIPIGRGQRELIIGDRQTGKTAVATDTILNQKGQNVICVYVAIGQKASSVAQVVTTFQERGAMEYTIVVAETADSPATLQYLAPYTGAALAEYFMYRERHTLIIYDDLSKQAQAYRQMSLLLRRPPGREAYPGDVFYLHSRLLERAAKLSSRLGEGSMTALPIVETQSGDVSAYIPTNVISITDGQIFLSADLFNAGIRPAINVGISVSRVGSAAQIKAMKQVAGKLKLELAQFAELEAF…
	146	UN000360	696	ATGAAAGAGCGAGAAGAGCGATCCTTAAAAACGGCTCTTTTTAAAGCCTTAGAAAACTTTAGCGAGCTATTGATTGAAGTCATTTTAACGCATAAAAAAAACATTATTTTACTCGCTACTAAAGAGAGCCATTGCTTAGGGGATTTGCTTTTAAGGGTGTATGGGGGGGAATTGAACGCTCAAATTTTAGGCGTTATTTCTAATCACGAGATTTTACGCCCTTTAGTGGAAAAATTTGACATCCCTTATTTTTACGCACCTTGTGTTGATCAAATTTTGCATGAAAAAGAGGTTTTAGCAACCATTAAAAACTTGGAATTACAGCACAAAGTGAGCGCGGATCTGCTCGTTTTAGCCAAATACATGCGCATTTTAAGCCATGATTTTACGAAGCGCTAT…	232	MKEREERSLKTALFKALENFSELLIEVILTHKKNIILLATKESHCLGDLLLRVYGGELNAQILGVISNHEILRPLVEKFDIPYFYAPCVDQILHEKEVLATIKNLELQHKVSADLLVLAKYMRILSHDFTKRYENQILNIHHSFLPAFIGANPYQQAFERGVKVIGATAHFVNESLDAGPIILQDTLPINHNYSVEKMRLAGKDIEKLVLARALKLVLEDRVFVHENKTVVF
	147	UN000361	1860	ACGGTATTTCCGAACAAGTTCCTGGATGACAAGCCTAAAGGTTATCTTATTGACGATATCGATATTGATGATAGTGACGATATCGATATTGATGATAGTGACGATATTGATGATGACCTTGATACGGAGCTGCTAACTATGACGAATGTGCTAACTATGTATATGACGCCGAAAATAGACCGATTTGATACCACCCTTCAATTAGAATTAGCAAAAGCAATGTCCCCTTGCATAATATGGATTCCAAACATTCATGATCTGTATGTGAATGAGTCGAATTACTTATCCCTCGGTCTATTAGTGAACTATCTCTCCAGAGATAGTGAAAGATGTTCCACTAGAAATATTCTTGTTATTGCTTCGACTCATATTCCCCAAAAAGTGGATCCCACTCTAATA…	620	TVFPNKFLDDKPKGYLIDDIDIDDSDDIDIDDSDDIDDDLDTELLTMTNVLTMYMTPKIDRFDTTLQLELAKAMSPCIIWIPNIHDLYVNESNYLSLGLLVNYLSRDSERCSTRNILVIASTHIPQKVDPTLIAPNKLNTCIKIRRLLIPQQRKHFFILSYTRGFHLEKKMFHTNRFGSITMGSNARDLVALTNEALSISITQKKSIIDTNTIRLALHRQTWDLRSQVRSVQDHGILFYQIGRAVAQNVLLSNCPIDPISIYMKKKSCKEGDSYLYKWYFELGTSMKKLTILLYLLSCSAGSVAQDLWSPPGPDEKNWITSYGFVENDSDLVHGLLEVEGALLGSSRTEKDCSQFDNDRVTLLLRSEPRNQLDMMQNGSCSIVDQRFLYEKYESEFEEG…
	148	UN000365	3162	CTCATCCGCACTGATATGTCGCTAACTGAGCTATACTCCTTATATGTGAAGAGTTCCGAAGAACTGGACCTTCAAAAACGCGAAAATGCGCGTCTAAACCTTCAATTAAAAACTATATTGCAGGAATTGACCGAAAATGCGCCTGTAATTAAAAAGCAAGAGCTGGAGTATGAGAAGTTGATCGAAACAAATAACATATTGGCCCATCAGCGTGATGAATTGCTAAGTAAGAAGGCTGATATGGAAGACTTAATGGGCAACGCACATTCCAAAATAAATCACCTAGAAAGAGAAAATAAAAAATTAAAGAACTCTCAGAACGACCTCAGTCGCCAAGTGTGCTACCTGCTAAAAGAAGTTGAACAATTGCGAATCGGACTCATTTCGGAGAGTTCTGCC…	1054	LIRTDMSLTELYSLYVKSSEELDLQKRENARLNLQLKTILQELTENAPVIKKQELEYEKLIETNNILAHQRDELLSKKADMEDLMGNAHSKINHLERENKKLKNSQNDLSRQVCYLLKEVEQLRIGLISESSAVQSGNLSTTDDVISKKLVTFTNIVELQENNQKLLLLVRDLSTKLEDAETLKQQMEAAAYQEKIENYAKKFQSMQETLNQQNNTVATLVSKCERYKKMYFELQRNIQKSGANAELSDIEDAEMREIDDTENKNTTNISTQSKSRKSNDGNGERRIRELEQQLQEVKDQYKTLKEQYEYYTQEKKNNERIMNEQFDSMRTEVRELTSTNCKLMSSLEYSKEQIKLQQKNISTYKQQITALEDRSKNYENTIIKHEQTVHFLKDEILKA…
	149	UN000368	1548	ATGGACGAAGTAGACAAAATTATTGTTCATACATTGAATCAAATTGGATGTCAAATCGATGATAATTCTACAATGGCGGAATTTACACCAAGCCTCTTGGTCCACACAATATCCAAATGCATACAAAGGATTCAACCATTGTCGGCCAACATTCCACATGCACTGCCTGAAGGATTACCAATGGCGCAGAGATTCTCTATAGCTACCGCGTTGTCGTCCTTTATCTCCAACCTTAACTACCGCGGTGATATTGGATATCAGACTTTCTTATACCCGAACGAAGTAGATGTTCGTAAACTGCTAATGTTTCTTATAGAAAAGCTTCCACGCGATGAAATAACATCAACAGGCGAAGATGGGAGTTTGTCTGGGGATTTGGAAATATGGCGGAGAAATATC…	516	MDEVDKIIVHTLNQIGCQIDDNSTMAEFTPSLLVHTISKCIQRIQPLSANIPHALPEGLPMAQRFSIATALSSFISNLNYRGDIGYQTFLYPNEVDVRKLLMFLIEKLPRDEITSTGEDGSLSGDLEIWRRNIKETMIQQLHKPWIPAYSRNLALGRSFGCSSKITSFKPHHNLNFFLVKTTPKQSGHCPQHKTINVFQQTAPKKFDLISSVLHQNSFDLYVGNETSKGDHLKCSAKENYLNVIDSTKFESSALADIGDTSPLSKLTEEVNNFKSRNVDLLTTKKTLINDINTVKNRQAKVQKELENIRPIVKMHERACLVLDNPKENAAKLEILIRSTLERRKNLDEQWREYRQPMLDTLECLRSSKQLHSIRNIKEFREAIAQLQGVLEEKNIQHNE…
	150	UN000373	567	GAGAAAAGGCCTTTGAAAAGATCTCGTTTAGGCCCTCCAGATGTGTATCCCCAAGAAGCGAGGCAGAGAGAAGATGAATTGACTCCGACAAATGTAAAACATGGGTTCGCTACCACCCCACCGTTGGCTGATGAATTTGGGACCGCTCACAATTCAAATATGAATGCCAATAAAGTTGGTTCGTTTTTCAACTCAATTTTATCAAAGAAAGAGGAATTGTTGACGTTGCAAGATACAGTTCGAAAAAAACAACAAATAAATTGTAAAGATAATTTCTGGCCTGTTTCACCACGAACAAAAGGAGCTTTGGATGCTTGGTTTAAAGATCTTGCTGGAAACAAGCCACTTCTAAGTTTAGCAAAAAAAGCACCTTCTTTTAACAAAAAAGAAGAAATTTTT…	189	EKRPLKRSRLGPPDVYPQEARQREDELTPTNVKHGFATTPPLADEFGTAHNSNMNANKVGSFFNSILSKKEELLTLQDTVRKKQQINCKDNFWPVSPRTKGALDAWFKDLAGNKPLLSLAKKAPSFNKKEEIFIILCDNQVNMQRAAWFIKLSAAYTLSFTESKNKKRSIYDPAVEWTGNIIKFMKELL
	151	UN000377	5244	GATGTNNTCAGCTCTNCTTCGCTCTTTTACATTGAAGAAAGGCTCCATGATGTTTTGGGGCATTTTGAAAAAGATTTTGAAGGCGAAGTAACTGCAGAGAATTTGGGGGCAAAGTTTGGTGGATATGGTTCGTTTTTGCCTACTTATCAACGCTCCCCTGCTATTTCATCTCAACCTAGGACTCCACTGAAGGTGCAGTCATACATCCCACCCAAGTCTCCTAACAACCCACCATCTGAGGACACAAATCAGGACCTGAAAATTCCACCTCATCCATCCCACTCTCGATATGCAAGGCCTGAGTCAGCTTCATTTTATGTGGAAAACTCAACTAAAAGAGATGTGCATTTGTCTANCTAGACAAGTTACTCAGGATCTTACTCCTAATCATGCATCCAT…	1748	DVXSSXSLFYIEERLHDVLGHFEKDFEGEVTAENLGAKFGGYGSFLPTYQRSPAISSQPRTPLKVQSYIPPKSPNNPPSEDTNQDLKIPPHPSHSRYARPESASFYVENSTKRDVHLSX*TSYSGSYS*SCIHE*ICKSN*SEDTEGLHKSWFSQCFC*EKC*NLQRFRP*LFSILII*GEPRWKWRVISWI*RCAL*ISHEHTKDFELSFCFWRLPTFSSS**SDALN*KGKASYKR**TLECPEGYPRKSSLSKGAHARDGCESV*RKEKVC*QK*AGYRSKECK*QEWRK*HERERNRCRELSGWRAFSKGFEVLTSILFKR*C*KSGKSN*W*HREGQWQGICCF*GAQ*GCSER*IRII*FSQGRNXXENGGNELVPSKGHPNSKTHSANTAQK…
	152	UN000380	3723	AAGCTCCAATCTCAGGAACCTGATGTTTCTAAGTCACTGCAATGTCAAAACCAAAATGCGGATGCAAAGGAGTGGATAGGCGAAAAGTATCTTTTAGAGGAAATGAAATTACAGGAAGAGCTCCGATGTAAAGCAGAAGCTGAACTTTCTGAAATGCACTTTCTGAACTTGCAATTGGTAGTATTTTCAAAAGTTTTGCATGAAACTCTGCATGAATTAAACAGTGGGATTAGGATCATGAAGAAAAAGGTGGATGAACTAGCACAACAGCTAGAAAACTCGGCTGAGTCTAAGGAGATGCTGATGCATAAGCTGCAGACTGCATTAGATGATGTACAATCACTGAAGGAGTCAGAGGAGAAATGCATGACGAAATGCAATGATTTTTCACTGAAAAAT…	1241	KLQSQEPDVSKSLQCQNQNADAKEWIGEKYLLEEMKLQEELRCKAEAELSEMHFLNLQLVVFSKVLHETLHELNSGIRIMKKKVDELAQQLENSAESKEMLMHKLQTALDDVQSLKESEEKCMTKCNDFSLKNHTLEAKIQGISDENYLLTQKVTEFENLIMEFRNYKNKYEACATEKDELENLLKQESLEKRHLKNEISSVVKELKTLQSEFDRQSSKKTDLETSIAFLQNKLRDLRSCFDSFSEQISGPSPASKSLPQETEDENFMNSILYLEKLQERVCDQIIQLIQEKKDIEKQRSIALGSLSSTESQILLIKQQFESELHDMVTKLDTVNRHVEKLQLELQDVGHKYKRSSEAEEKYAAQNRELSSRITSLENELQRATSENRDLAQKILDFDS…
	153	UN000381	999	TTTGTAGCAGTTCATACTGGAGCTGGAAATTGCATAGATGAAACCAAATATCAGCGTGTTATAAAGGAAGCATGCGTACGCGCAACGGATATACTAAAGAATGGGGGTACCGCGATGGATGCGTGTGAAGCGGCAATAATGCGTCTTGAAAACTGCGGTAATACGAATGCCGGATTTGGTTCTAACCTTTGTTGGGATGGTCGTGTGCAATGCGATGCATCTATAATGGATGGTTCAAATTTACATTTTGGCGCCTGCACAAACGTGAGTACTGTACGAAATCCCATACATCTGGCTCGTTTACTATGCGATGGACAGTCTACTATGCTGTCAATGGAGCGTATACCGCCAATGATAATGGCTGGCAGTGGTGCTGAAAGATATGCCGAAGAACTAGGC…	333	FVAVHTGAGNCIDETKYQRVIKEACVRATDILKNGGTAMDACEAAIMRLENCGNTNAGFGSNLCWDGRVQCDASIMDGSNLHFGACTNVSTVRNPIHLARLLCDGQSTMLSMERIPPMIMAGSGAERYAEELGCTMIDASAMISSKAKFSYNHYKSKVAVATSATEGHTSTSNGLSLSPVVTAQTSALDTVGAVCVDSSGNTAAGCSSGGLLLKVPGRVGQAATYGAGCWATNTNELSVATCTTGNGEYLMKTLLAKEICGDLLTTDCAVTSLHKIFKCKFLESPFLPADQELYAGALSLIYYPQCNTGEVLWSHTTKSFCVGYMSTQQKAPK
	154	UN000382	5385	ATGTTGTCTGTGGGGAGGATAGATGGGAGGAAGGGGTTAGGATTTGGTGTTGGAGGAGAGATGGAAGAGGCCGAGCTCGAAGAAGGGGAGGCTTCTTGTTATCAAGACGATGATGCAGGAATGGACCACGACGTTGCTCTCTCTTCCCTCTCTTACATTGATGAAAGAATCCAACATGTCTTGGGGCATTTTCAAAAAGATTTTGAAGGTGGAGTTTCTGCAGAGAACCTGGGTGCAAAGTTCGGTGGATATGGTTCATTTTTACCTACTCATCAGCGTTCTCCTTCCATCTGGTCTCATCCTAGGAGTCCACATAAGGTTCAGACCTATAGCACACCAAAATCTCCTAACAACCTGCTAGTGGAGGGTGGGCAGAATCGTCCAAGTCTGATGAGTGGG…	1795	MLSVGRIDGRKGLGFGVGGEMEEAELEEGEASCYQDDDAGMDHDVALSSLSYIDERIQHVLGHFQKDFEGGVSAENLGAKFGGYGSFLPTHQRSPSIWSHPRSPHKVQTYSTPKSPNNLLVEGGQNRPSLMSGSHSARHASDPNSARLSSNMPYMDNSSTTCILEDVNTNRSVSATDQKMLKLRIKVGSNTSLSAQKNAAIYSGLGLMSPSSSLEDSPSLSGGLSPEFHAPDEYPLTLLQRLTSFVVPGEQLVSPLHDCLLRIYEKKKHHLKDSKTEADQKGSQPIPTKLTGEHIIRDKKGFGEKKTKSVEKKRTMEEINRRTVEEQSANGKNSVNDTSDNLHKEHEIEAPGGREPVSNGAKLPLLSGSKDITDKLERPMNGDGGSYKVFDLSREENKG…
	155	UN000388	738	AAGTTGGTGCAAAGGGCGAATGCGTCCCTCCTCATTGGTACTTCGTCCTGGAAGGAACAGTTTGCGGATGCGTTGACAGTAACTGCTGGCGATGATGATGGCAATGGCGACGGTGGTGAGGATGATGAACCGCGATCGCCATCATGTTTTGATTACATATTGCATTTCGTAACACTTTTCTGGAAACTTATATTCGCATTCATACCGCCAACAGATATTGCCAACGGTTACGTGTGCTTTGTTGTTTCGATATGTGGCATCGGTATGGTGACAGCACTAATTGGTGATGTGGCATCCCATTTCGGTTGTACGCTCGGCGTTAAGGATGCGGTTACAGCGATTTGTTTTGTAGCGCTCGGCACCAGTTTGCCTGATACATTCGCCAGCAAAGTGGCCGCC…	246	KLVQRANASLLIGTSSWKEQFADALTVTAGDDDGNGDGGEDDEPRSPSCFDYILHFVTLFWKLIFAFIPPTDIANGYVCFVVSICGIGMVTALIGDVASHFGCTLGVKDAVTAICFVALGTSLPDTFASKVAAIQDKTADASIGNVTGSNAVNVFLGIGVAWTMAAIYHESHGRAFRVEAGTLAFSVTLFLSGAVIAVCLIMYRRKKSIGGELGGPSPQKYIHSAIFFSLWLVYLIMSTLEAYGVV
	156	UN000390	5196	GATGGGCGCAGCACGGAAGACTGGTTATGCAGTTCCCCTCAAGGTGATGAATTCAGTAATGAAGTTGGTAAGACCAATTCACAGTGCCAGTTGCACTTATCACAGTCATGCTTGGAAACATCATGGATGAAGGAAAGCCCATCCATTTTGACGGAAGGGCCACCAGATGCAGCCTCTTACTGTGCGGTCGAAGAGGCAGCTTCTCCGCAGCCATTGCAACTACTTAATGGTTTGAATGTTAGCTCTTCTAAACACTTGGTGCCAGATACCTATAAGAGGGATGCGAGTTATACATTTGATTCTTCGAAGCTGGCAGTCAATGATGGAATGATTGAAGTTAAACCTGATTGTGTTTCAAGGAATACCCGTGCTCGCAAGTCTAACCGTTTGGCTAGAACA…	1732	DGRSTEDWLCSSPQGDEFSNEVGKTNSQCQLHLSQSCLETSWMKESPSILTEGPPDAASYCAVEEAASPQPLQLLNGLNVSSSKHLVPDTYKRDASYTFDSSKLAVNDGMIEVKPDCVSRNTRARKSNRLARTRKAARQAIDTTGVFLSIARGKRSCCNQARSSAWGAMGNIIQLFEKNSEIMKFNSQLDQVLNQEPKRGRGGLGSKRSRKAQIKASKSKRCASTSHVHSKVKNERKRGKKGLQAVPPNVVETLDSVQSVVSNCLPPLDSQASFEVLEPSIEILHRVGGDGSGAVQLPCLVQNLEKFDMPPDVCVRDALVGDKELESTVTTQDTSIENNKVDFPGISSIIGTDASGEAPNKNRRVDPETSPDSDMLHVRPDVVNNATEGIISSQRKAYT…
	157	UN000394	342	GTCACCTGTGGCGTTTGTCAACTTGTGCAGAATCGAAATATGAAAAATCTGCCCGAGGTCTTTATATGCTGTTACACATGTCGACGCAGAGTACACCCGAGTTGTATTGAAATGCCACATCGCATGGTGGCGCGTGTGAGGAACTACAACTGGCAGTGTACCGAGTGTAAATGCTGTATTAAATGCAAAGGAAAGAAGGATCAGAACAAAATGTTATACTGCGAGCAGTGCGATCGAGGCTTTCACATTTATTGCCTGGGCATCAAAGCCGTGCCAGATGGTCGATGGAGTTGTGATCGTTGCAGTATTTGCATTCGTTGCGGCGCCACCAAACCAGAGGGC	114	VTCGVCQLVQNRNMKNLPEVFICCYTCRRRVHPSCIEMPHRMVARVRNYNWQCTECKCCIKCKGKKDQNKMLYCEQCDRGFHIYCLGIKAVPDGRWSCDRCSICIRCGATKPEG
	158	UN000397	366	ATGTCTGGAAGCACGGGAGAACGTTCTTTTGCTGATATTATTACCAGTATTCGATACTGGGTCATTCATAGTATTACTATACCTTCCCTATTCATTGCGGGTTGGTTATTCGTCAGCACAGGTTTAGCTTACGATGTGTTTGGAAGCCCTCGGCCAAACGAGTATTTCACAGAGAGCCGGCAAGGAATTCCATTAATAACTGGTCGTTTTGATTCTTTGGCACAACTTGATGAATTTAGTAGATCCTTTTAGGAGGCCTCAATGACCATAGATCGAACCTATCCAATTTTTACAGTGCGATGGTTGGCTGTTCACGGACTAGCTGTACCTACTGTTTTTTTTTTGGGGTCAATATCAGCAATGCAG	122	MSGSTGERSFADIITSIRYWVIHSITIPSLFIAGWLFVSTGLAYDVFGSPRPNEYFTESRQGIPLITGRFDSLAQLDEFSRSF*EASMTIDRTYPIFTVRWLAVHGLAVPTVFFLGSISAMQ
	159	UN000399	6450	CTGGCAACCACAGTAGCGTGGAGGTTTTCAAATGGCAATGGCAGAAGCCATGGAGCTAATGATCTGGGAAGAAATATGGAGGCAAAACCTCAAGATTCCGAGCCCCCAACACCTCACTCAGTCATGAAGATGGGTTTGAGGGATCGTGGTAGCATGGAGGACCCAGACGGGACTTTGGCAAGTGTTGCCCAATGCATTGAGCGGTTGCGTCGGAGTTCTTCAACAGCACAGGAGAAGGAGAACTCTTTGAAGCAGCTGCTGGACCTTATAAACACTCGTGATAATGCTTTCAGTGCAGTTGGATCTCACTCTCAGGCAGTTCCAATCCTTGTTTCTCTTCTCAGGTCAGGATCACTTGGAGTGAAGTTGCAGGCTGCTACTGTTTTAGGATCTCTCTGT…	2150	LATTVAWRFSNGNGRSHGANDLGRNMEAKPQDSEPPTPHSVMKMGLRDRGSMEDPDGTLASVAQCIERLRRSSSTAQEKENSLKQLLDLINTRDNAFSAVGSHSQAVPILVSLLRSGSLGVKLQAATVLGSLCKEDELRVKVLLGGCIPPLLGLLKSSSAEGQVASAEAIYAVSQGGARDHVGSKIFSTEGVVPVLWQQLQGLNDDSMVGNLLTGALRNLSSSTEGFWSATIAAGGVDILLKLLASGQSSLKADVCFLLASMMMEDASVCSRVLAAEATKKLLKLMGPGNEASVRAEAAGALKSLSAHCKEARRVIANSNGIPTLINATIAPSKEFMQGEHAQALQENAMCALANISGGLSYVISSLGESLESCASPAQIADTLGALASALMIYDSKAD…
	160	UN000400	1494	CAGGTGATGTCTTCTGCAAAAGGAAGGAATGTCTCAGAGATCACAGAGGACTTAGAATTCAGCCCCCTTGACAAGAATCTTTGCACAATATGCCTGGAACCTCTCATCTACGGCGAGGGTGCCAGCTCCTGCCAGGCCATATTTACCGCCCAGTGCTCGCATGCCTTCCATTTCATCTGTATCTCATCAAATGTCAGGCATGGCAGCGTTACATGTCCTATATGCCGAGCCCACTGGACCCAACTCCCTCGGAATTTCTCACCCCTCCCCACCCCCTGTCCCCAACAGACCGACCCTATCCTACGCATTCTTGATGATTCCATTGCCACCATTCGAGTCCACAGGCGCTCATCCCTCCGTTCTGCTAGGTATGATGATGATGACCCCGTCGAGCCAGAA…	498	QVMSSAKGRNVSEITEDLEFSPLDKNLCTICLEPLIYGEGASSCQAIFTAQCSHAFHFICISSNVRHGSVTCPICRAHWTQLPRNFSPLPTPCPQQTDPILRILDDSIATIRVHRRSSLRSARYDDDDPVEPEDPIHPGLRLALIPVPLVSSHRNFPACGHSHPPSLQLSSRPPPTSHTSPRVHSPPVWQFTSSSSSTLILQPNGQDAPPPPYLCSSSRTYHLSVKLAHQQATDLVLVVSTNGPHLRLLKQSMALVVFSLRSVDRLAIVTYSSTATRAFPLKRMSSHGKRTALQVIDRLFYQGEADPREGLRKGIKILDDRTHHNPHSCILHLSDGPTRASYLSREMQEARVPIHCFRAGFSFGTSNGFVMHEFEEFLSRLLGAVIRETQLRIGEEGLI…
	161	UN000403	6690	ATGGCGAAGAAAACCGAAAGAGATACCAATACCAATACCATTCCTCTCTCCAGATTCGGCGTCTTGGTGGCGCAGTTGGAATCGATCGTAGCTTCCGCTCGCCAGCAGTCTCCAGACGCTCTCCTCTGCTTCGATCTCCTCTCCGATCTCGTTTCTCTAATCGAAGAAGAGCCCAAGGAATCTATCCTCTACAGCCAGAGGAAGTGCGAGGATGCCCTCTTCTCTCTTCTCATTCTAGGCGCCCGTCGTCCAGTGCGGCGTCTCGCCTCCGTCGCGATGGGTAGAGTCATATTCAAAGGCGACGGCATTTCAATTTACTCGAGAGCGAGCAGTCTCCAAGGATGGCTGTCGGATGGGAAGCGAAGCGAGCCTCTGTCTTGTGCTGGTGCAGCACAATGC…	2230	MAKKTERDTNTNTIPLSRFGVLVAQLESIVASARQQSPDALLCFDLLSDLVSLIEEEPKESILYSQRKCEDALFSLLILGARRPVRRLASVAMGRVIFKGDGISIYSRASSLQGWLSDGKRSEPLSCAGAAQCLGELYRLFGRRITSGLTETTSIAAKLMKFHEDFVRQEALQMLQNALDGSGGIGASGAYSEAFRIVMRLGVGDKSFIVRIAAARCLKTFATIGGPGLGVVELESSATYCVKALEDPVSSVRDAFAEALGAILALGMNPEAQVQPRGKSNPIAGKKLEGGLHKHLILPFMKASGAHLKELRVGLALSWVFFLQAMRLKYLLPDSELQNFSLRAIEMLLGNSVDAHALACVLYILRVGATNQMTEPTQRSFLVLLARQLESPDSNPAMR…
	162	UN000405	6636	AGAAACCTCTCCAATCCGAAGAAGCTCATTCGCACCGCCGAAGAAGAGCTCGAATCCAAGCTAGGGTTCGATCTCTTCACCGAAGGCGAAAAGAGGCTCGGATGGCTTCTTTCACTGTCATCTTCGTCGTGGGAAGATCGAGACAACAACAAGATATACAGTTGTGTAGATCTTTACTTTGTTTCTCAGGATGGATCTTGTTTTAAATCAAAATATAAGTTCGCACCTTATTTCTACGCTGCCACAAAGGAGAAAATGGAAATGGATGTGGAATCATATCTCAGACGACGCTATGAAGGACAAATCTCTGATATAGAAATTGTGGAAAAAGAAGATCTAGACCTGAAAAACCATTTGTCTGGCTTGCGCAAGTCGTATTTAAAGATCCGCTTTGACACT…	2212	RNLSNPKKLIRTAEEELESKLGFDLFTEGEKRLGWLLSLSSSSWEDRDNNKIYSCVDLYFVSQDGSCFKSKYKFAPYFYAATKEKMEMDVESYLRRRYEGQISDIEIVEKEDLDLKNHLSGLRKSYLKIRFDTVQQLMSVKNDLLHVVERNRVKLDAVEAYDSIFTGKSMQRPQDYIDCILDLREYDVPYHVRFSIDNDVRCGQWYDVSISSIGVILEKRADLLQRAEVHICAFDIETTKLPLKFPDAEYDLIMMISYMVDGQGYLIINRECVGEDIEDLEYTPKPEFEGCFKVKNVKNENELLRQWFAHMRDVKPGIYVTYNGDFFDWPFLETRAAYHGIKMSEEIGFLCDKNQGECRAKFACHLDCFAWVKRDSYLPQGSQGLKAVTKAKLGYDPLE…
	163	UN000406	1590	ATACTTAAACGGAATTGGATGCTTAAACATTTGCATGTACTGCCAGCAGTGGTGGTTTTGTTCCAAGATATGGAATGGAATGACCCACAGTGGTCTGAAAAGCAGGTGCAGTGTGCGTCCACAATACAAAGTCTCAAAAGTGCTTTACAGGAACGCAACACCCGCTTGTGTCTCGTACTGTTGCAGAAATCGTCTCCCCTGCCACCAGGTGAAGATTTGTTAGCATCCGAACGTGCCGCTAGTTTAACTACCGCCTGTGGTATCAATAGTAAAATGTTATTCATTCTGCCGCATACGGAGCATTTAATGGGCTATACATTGCGTTTGGAATCTGCTTTCCTGGACATGGCTCAATCCTATTATGCACTCATGTCAAAACGTATTCGCGCACATCGTGAC…	530	ILKRNWMLKHLHVLPAVVVLFQDMEWNDPQWSEKQVQCASTIQSLKSALQERNTRLCLVLLQKSSPLPPGEDLLASERAASLTTACGINSKMLFILPHTEHLMGYTLRLESAFLDMAQSYYALMSKRIRAHRDQLTTAHTNLKIRHQFKLGFVAEIRQDFSTALKHYTQAYATLDEIRITDSNCLEMKTIAGFLNYKLCRLMFKLKVPRDAINHFISHIEKYKNRVGFKDLIFEHYAWLSTQHSVFAELFCEAIKNGLPALQTQNPGIYYYKAAEFVMKRKEAFLQSNAMLLSPTDPTGPSALQNNNSVALYTEFFGIRAVKTGDPISEQQTNMLIRENEKSFNHSNAIINLLSLARAQFKIYKCPRFRNKLAIDMAEEYYKSGDHANALTLYSVMLTD…
	164	UN000408	3807	ATCGATGCGGATATAGCTAAGATCCAAGAGGAGAGGAGGAAGAAGGAGGAGATCGCCTCTCTCACTACGGTCACCTATGATTCCGATCTCTATGGTATTGGCAACAGATTCGAGGGATACGAGCGCTCGATCCCGGTCAATGAAGACGAGGAAGATCAAGATGTCGGGGAGCGCGAGGTCGCCAGGAGGCTGGCTTCATACACTGCGCCCAAGTCGGTGATGAAGGATTTGCCAAGAGGAATGGGCGGCGGTGACGACGATGATCTGGGGTTTAAGAAGCCGCAGAAGATCATTGACAGGGAGGATGATTATAGGAGGCGGCGGCTGAATCAGATTATCTCGCCTGAGAGGCACGATGCGTTTACGGATAAGACGCCTGACCCGTCCGCAAGGACGTAT…	1269	IDADIAKIQEERRKKEEIASLTTVTYDSDLYGIGNRFEGYERSIPVNEDEEDQDVGEREVARRLASYTAPKSVMKDLPRGMGGGDDDDLGFKKPQKIIDREDDYRRRRLNQIISPERHDAFTDKTPDPSARTYADVMKEEALKRQKEELLREIGKKKKEEEEKKASEKDSGSAPVQASQKRRNRWDQSQEQDAGSKKAKTTAGSDWDLPDSTPGIGRWDATPTPGRVADATPSLSRRNRWDETPTPGRLADSDATPAAGGATPGATPAGMTWDATPKLAGLATPTPKRQRSRWDETPATMGSATPLPGATPASAFTPGVTPVGGIDLATPTPGAINLRSAMTPEQYNLLRWERDIEERNRPLTDDELDAMFPQEGYKILDPPASYVPIRTPARKLLATP…
	165	UN000410	6591	GCCGTAAAATGTATGCGCTCGATTCGTCGTTGGTCCTATGAGATGTTCAAGAATGAACGTGCTGTTCGCTTCGTTGTGATGGTCACACCTGAGGATCTGAAAGCCAATGCGGAATACATCAAGATGGCAGATCACTATGTCCCAGTGCCTGGTGGTGCAAATAACAATAACTACGCCAACGTTGAGTTGATCGTGGACATTGCACTACGGACTCAGGTTCAGGCTGTCTGGGCTGGTTGGGGACATGCTTCCGAGAATCCGAAATTGCCGGAATTGTTAAATAAGGAGGGTCTTGTCTTTCTGGGCCCACCCGATCGTGCTATGTGGGCGCTTGGTGATAAAGTTGCTTCATCAATTGTTGCCCAGACCGCCGAAATACCAACCCTGCCCTGGTCTGGA…	2197	AVKCMRSIRRWSYEMFKNERAVRFVVMVTPEDLKANAEYIKMADHYVPVPGGANNNNYANVELIVDIALRTQVQAVWAGWGHASENPKLPELLNKEGLVFLGPPDRAMWALGDKVASSIVAQTAEIPTLPWSGSELKAQYTGKKIKISSELFQRGCVSNAEEGLAAAKKIGFPVMIKASEGGGGKGIRRVDIAEEFPALFRQVQSEVPGSPIFVMKLARGARHLEVQLLADQYGNAISLFGRDCSIQRRHQKIIEEAPAIIAQPEVFEDMEKSAVRLAKMVGYVSAGTVEYLYEPDGQYYFLELNPRLQVEHPCTEMVSDVNLPAAQLQIGMGVPLYRLKDIRLLYGESPWGSSVIDFETPVNKPQPSGHVIAARITSENPDEGFKPSSGTVQELNFRS…
	166	UN000412	330	GTATCGGAAGATTCACTAAAAGAATTCTCAATGATGTTCAAGCATTTTGACAAAGACAAGAGTGGTAAATTGAATCACCAAGAATTTAAATCATGCCTGCGAGCGCTCGGCTATGATCTCCCAATGGTAGAAGAAGGTCAGCCCGACCCAGAATTCGAGGCCATTCTCAATGTTGTGGACCCGAATCGTGATGGACATGTTTCATTGCAGGAGTACATAGCTTTTATGATTTCAAAGGAAACAGAGAATGTACAATCCTACGAAGAAATCGAGAATGCTTTCCGTGCTATCACTGCCTCCGACCGCCCCTACGTAACAAAGGAAGAGCTT	110	VSEDSLKEFSMMFKHFDKDKSGKLNHQEFKSCLRALGYDLPMVEEGQPDPEFEAILNVVDPNRDGHVSLQEYIAFMISKETENVQSYEEIENAFRAITASDRPYVTKEEL
	167	UN000423	5790	GGGAAAACAGAAAGGAGAGGGAGGAAGAACCAAAACCCGTCCTTCCAGCAGCAGCCTTGCGGCATCGCTGTTGCGATCTGGAGCTACAACAGTCGGATTCGGTGGCTACGTTGGGAGCTCTCGACTCGAGCCGTCCGTGTCATCAAGAGAAGACTCCGTTCCCCTCGCGGACATCGATGGTGAAGTTGCACAACACTTGAAGAGGCTTGGTAGAAAGGATCCCACAACAAAGCTCAAAGCTTTGGCATCTTTATGTATACTCTTTAAGGAAAAGCCTGGGGAAGTTGTTCATATTCTTCCACAATGGGTGTTTGAGTACAAGAGGCTCTTGCTCGACTATAACAGAGATGTTCGGCGAGCTACTCATGATGCCATGACTAATCTTGTCAGCACTGTCGG…	1930	GKTERRGRKNQNPSFQQQPCGIAVAIWSYNSRIRWLRWELSTRAVRVIKRRLRSPRGHRW*SCTTLEEAW*KGSHNKAQSFGIFMYTL*GKAWGSCSYSSTMGV*VQEALARL*QRCSASYS*CHD*SCQHCRKRLGSTFEVLDGSLVVFSV*SNT*SFTGC*TIFSDSISSTGEAVRCLDFVRK*DLFIFG*EPEANTTGYV**SCPNG*IGRHAPTCDFFITIGNNNTD*YIVGSAIGKA*F**GNH*CKACF*GKSSRNFFS*KDVFQSQIFSGISQVPKPWSSVSYILSIGVFH*TYSSCLQ*GEYEDFICCNTWGFSRKGSCMPLFYVGCSIAIFQKIS*QLAPQQYSEDCTNSFLAFSKERVPWITRSFISNFGSFLRYNSA*IHKWGAVPFE…
	168	UN000424	6324	ATGCTGCATCAGCTTCCTCGCCTCACGGGCTCGCTTCGAGGCCCTTACGACATCGACCAGGCATATCTACAGCGCAAAATCATCCTCCAAAACCACAAATCCCAGAGATTTGGAAGTTCAAACAATGATCTAGACCTTGCTCGAGATATAGTTCATCGGTGGGAAGAAGCTTCGACAGATGTGCGGTTAGCATACAAAGAATTTCTTGGTGCAGTAGTGGAATTGTGCAATGGTGAAGTTCTCTCTGAGGAATTCCAAGAGGTGGCAAAAACCTCTTATAATCTTTTAACTGGTTTCGGAACAGATTTTGATGAAAGTAGAAGGATCATTGAAACAAAGGGAGAACTACAGAGGCTTTTTGGTTACTCTGTTTCGGAGACGAGTCTGCAGAAAGTTGCT…	2108	MLHQLPRLTGSLRGPYDIDQAYLQRKIILQNHKSQRFGSSNNDLDLARDIVHRWEEASTDVRLAYKEFLGAVVELCNGEVLSEEFQEVAKTSYNLLTGFGTDFDESRRIIETKGELQRLFGYSVSETSLQKVASLAQRLFSLQSSDHEAGVTVQMSSNGCIDDLSEFGININFQAPERFLVDISSENGVSIFDGSYLTSVSIHEEGYDESEATNHHSVIDKNVNLRWLKDACDMIVKKGGSQLSGDELAMALCRVLESDKAGDEIAGDLLDLVGDSAFETVQDLLLLGVSIPNLTDSMQLASPTL*FRHRKELADSIRHGLHILKSEKTTPNAQPRMPSYGTQVTIQTESEKQIDKLRRKEEKRLKRGTEHGFESDFCTGSFSSLLQASEKRQPFDNLI…
	169	UN000427	2262	GGTGAAGTTGCTCTAGAAGATTCCTTCAACAGTGATTATGATTTGGATGATGTTTCTCAAAATGATAATTCTACTTCTGTGGAGAAGGTGGGCTTATGTCAGGCAGATGATGATTATCAGTATGAGGATGGAGAATTTCGGGAATCTATTATACATAGTTGGGGAGAATATGAGGGTGAGGAGAGGGAAGCTGAACGTGTGGATTATGGTTCAGACAATATTGACACCGATCCCTTTGAAACGTCTGCAGATCATGGTGTTGTTGACCGTGATGAATGCAAGAAAGAGACACGGTCAGAGGCCAGTCATGTTTGTCAGGAAGGTAAGCTGGATGGAGAGAAGAATGAAAGAGAACCCAATAGTCTGGCATTCCTGCGAGGATCAATAGAATCAAATGCA…	754	GEVALEDSFNSDYDLDDVSQNDNSTSVEKVGLCQADDDYQYEDGEFRESIIHSWGEYEGEEREAERVDYGSDNIDTDPFETSADHGVVDRDECKKETRSEASHVCQEGKLDGEKNEREPNSLAFLRGSIESNASPVEPCERRGMKFVRKVSRRDTGKQYDNEKIEMDVKVVSDLNAGSDKVSVDEALGYRDSCHSAILRTKSTGWDQLPDVCRSSRDAVMDVRGSGIVKNGVGRLGSSDADGSLRRVFRSTSNRELSSRIEGPTFSDASVRKDRVYVDGSRSNSLDERDAGLAKSVGRGESSVHMHGRGRVGNHWLESSGGHWGRNLRHSPGYRGPRDHVLPGPKNAAAAAAAKLESSGFVVAPDFTIVRAGGVTHDRVRRQSANSPSRNVHRSVTGRG…
	170	UN000434	249	ATGACCGTGAGAGTTCGATTAACAAGATCCGGGTTCCCAACTATCATTCCAACGTTTCATAGAAGGATAATCGAACGAAGGGATGATAGGGCAGATCGATGGGTTCGAATCTACCTCTCGTGGTTTACGGTGGGGCGGATCGTCGAGTTAGCAAAACCAGTAACTCGAGATTTGTTCGCATCAATCACAGAGGATGCTCCGGGCCCTGAGGAAGTAATAGAGTCAGTCCTTTACCTAGCTATATCTCTA	83	MTVRVRLTRSGFPTIIPTFHRRIIERRDDRADRWVRIYLSWFTVGRIVELAKPVTRDLFASITEDAPGPEEVIESVLYLAISL
	171	UN000435	5271	ATGTCATTTTTTAGCAACTTCGGGAACGGGACGGATTCAGGCCACATTATGGATGGGAAATCTGAGGGCAGTGGTGTTGGTAGAGTTCATAGTCCAGTAGATGCAAGCTATAGTTCAAGTAACAAGGATGTCCATGTCAAGATGGATGGTCAATACCAGAGTGATGAGGAACCAACTGGTGATGATGCCGGTAGGCTGCAGGATGGGGCAGTTGGAAGCAATAGTAGTGGAAGAGAAATGCAGAATTTTCAGCCGTCTGGAAGGAGAACAGGATTAGTTGGAAAATGGGGTTCGTCCTTTTGGAAGGATTGCCAACCTATGCCCACTCGAGATGGATCTGAATCTGGGAAAGATATGGATTCTGATTATAAAATCGAGGAAGGATCTGATGGTAATTCA…	1757	MSFFSNFGNGTDSGHIMDGKSEGSGVGRVHSPVDASYSSSNKDVHVKMDGQYQSDEEPTGDDAGRLQDGAVGSNSSGREMQNFQPSGRRTGLVGKWGSSFWKDCQPMPTRDGSESGKDMDSDYKIEEGSDGNSSDGRADRLESEDGDGHKDAEVFQRAQADVPTDEMLSDDYYEQDGDDQSDSLHHREFNRTSASSSRQSSRPIPVKKNMSRHSKSAKLDEYDYDDDYNEEDEEDEDDPDDADFEPDYEDKGGRTNSKAKVWGSDGSDEEDDDVDLEISDDDMDIIDSSNRRRQRKGGHSLKPTRGIKSFSMYNKRKRGRSFVEEEDSSEKDSEKDSDEDFNNRTKRGMHLQKKIVSRTTMSANIMARNNEVRTSSRSIRKISYAESEESEDFDDGKAK…
	172	UN000440	906	AAAGAAGCGGTTGTTCTTTTGAATATGGGAGGGCCTAACAGCCTTTATGAAGTGGGGGTATTTTTAAAAAACATGTTTGATGACCCCTTTATCCTTACCATTAAAAATAATTTCATGCGTAAAATGGTGGGTAAAATGATCATCAATAGCCGCATAGAAAAATCCAAAAAAATCTATGAAAAATTAGGAGGCAAATCCCCTTTAACGCCTATCACATTCGCCCTTACAGAGCGTTTGAACGAATTGGATCCTACTCGTTTTTACACTTATGCGATGCGTTATACCCCCCCTTATGCGTCTATGGTTTTGCAAGATTTAGCCTTAAAAGAGGTAGAAAGCTTGGTGTTTTTTTCCATGTATCCGCAATATTCTAGCACCACCACCCTTTCTAGTTTCAAT…	302	KEAVVLLNMGGPNSLYEVGVFLKNMFDDPFILTIKNNFMRKMVGKMIINSRIEKSKKIYEKLGGKSPLTPITFALTERLNELDPTRFYTYAMRYTPPYASMVLQDLALKEVESLVFFSMYPQYSSTTTLSSFNDAFNALKSLETFRPKVRVIERFYADKKLNEIILNTILSALNNRKSQDFVLIFSVHGLPKSIVDAGDTYQQECEHHVNLLKELMQQKNIPFKEVLLSYQSKLGPMKWLEPSTEELIEKHRKSNIIIYPLAFTIDNSETIYELDMQYRLMAERLAIKEYLVCPCLNDSIEF
	173	UN000449	7023	GCCATGGCTACTTCAAGAGACATTCAGGAAATCGTCTCAAAGCTCTCATCAGATAAAGCGAAAGCTCGCGAAGAAGGGATTAAGCTGTTGAACACATGGATGGATGGCGAGAGATCGTTCGGTTTCTGCAAATTACTCGGTCAGAACACTGCTAAGATCAAGCCGAACGAGATTCCACATGCGGAGACATGGCCGTTTCTCGTTAAGCTGCTGATGAATTGCATTACTCTGGAGATATCAGCAAGTAAGAGACGGCTTCCGAAGGCGTCTATTGCGAAAACGCTTCGAGCCGCCATTCAACGTGCAGAGGATGCCAAGTTTTCTGGAAAGGCGTTGCTTCTGTTATCTGTGGTGAAGTCACTTTTTAAGCACATATGGGATGTTGTAAGGGATGTCCCA…	2341	AMATSRDIQEIVSKLSSDKAKAREEGIKLLNTWMDGERSFGFCKLLGQNTAKIKPNEIPHAETWPFLVKLLMNCITLEISASKRRLPKASIAKTLRAAIQRAEDAKFSGKALLLLSVVKSLFKHIWDVVRDVPSFQYEYGIILRHLLAVKEYRFHMRKQVYCCLVLWYINKVEVAIGEKDSIQPNTREEVFRYTLTLHSLLENPPGDFPDNLREDLTKGFVSIFRHVREEGKISRKLVECINTFLIRDGPNLGHQSMDIHSAVQEFMFRFWLSTHDRVLKNALVLYARIQLKLCRSSADGSPLVEQLFDVVGKELDQGNVANTGMPRVDAARDDKLGTLANEQRDLMELAATVFYQASVNTTKTLLLEKRLKREHAADRVKDGLMEGKWLWIGSFYFLI…
	174	UN000450	6486	ATGGCACACTTAGGTGGTGGTGCAGAAGCGCACGCCCGGTTCAAGCAGTATGAGTACAGAGCAAATTCAAGCCTTGTCCTCACGACCGACTCCCGCCCCCGCGATACCCATGAGCCAACCGGAGAGCCTGAGTCTCTCTGGGGCAAAATCGACCCTAAGAACTTCGGTGACCGCGTGTACAAAGGAAAACCTCCTGAACTGGAAGAGAAGCTGAAAAGATCCAAGAAGAAGAAGGAGCGGGAGCCTCTCACCTCAGAACCTGCCCAGAAGAGGGAGAGCAAGCGGCGCCGCATCCAAGAAGAGAGCGTCCTCTCCCTTGCAGATGATAGCGTGTACCAGCCCAAGACCAAGGAGACACGGGCTGCATATGAGGCCCTGCTCAGTGTCATCCAGCAGCAG…	2162	MAHLGGGAEAHARFKQYEYRANSSLVLTTDSRPRDTHEPTGEPESLWGKIDPKNFGDRVYKGKPPELEEKLKRSKKKKEREPLTSEPAQKRESKRRRIQEESVLSLADDSVYQPKTKETRAAYEALLSVIQQQFGGQPQDILTGAADEVLSALKNDKVKNPDKKKEIEKLLNPISSQLFDQLVSIGRLITDYQDGGDAAGPANAASDEALDDDIGVAVEFEEDEEEEDSDYDQVQEESDEEDDGPESNGNGAMQMGGIDDDDAEDTNEGLMLNVQDIDAYWLQRKISQAYEKIDPQHSQKLAEDVLKILAEGDDRDVENRLVMLLNYDKFDLIKLFLRNRLKIVWCTRLARAEDQEQRKKIEEEMIGRDLAAILEQLHATRATAKERQKNLEKSIREEA…
	175	UN000451	6459	CTGGCGGCTACACTAGCGTGGAGGTTTTCGAACGGCAATGGCAGCGGCCATGGAGCTAATGATCTGGAAAGGAATGTGGAGGCGAAACTTCAAGATTCGGAGCCTCCAACCCCTCGCTCGGTCATGAAGATGGGTTTAAGGGACCGAGGCAGTATGGAAGATCCAGATGGGACATTGGCAAGTGTTGCCCAGTGCATTGAGCAGTTGCGCGGGAGTTCTTCATCATCACAAGAGAAAGAGAACTCTTTGAAGCAGTTGCTGGACCTTATTAACACCCGCGATGATGCTTTCAGTGCAGTTGGATCTCACTCGCAGGCAGTTCCTATACTCGTTTCTCTTCTCAGGTCAGGAACACTTGGAGTGAAGTTGCAGGCGGCTAATGTTCTGGGATCTCTTTGT…	2153	LAATLAWRFSNGNGSGHGANDLERNVEAKLQDSEPPTPRSVMKMGLRDRGSMEDPDGTLASVAQCIEQLRGSSSSSQEKENSLKQLLDLINTRDDAFSAVGSHSQAVPILVSLLRSGTLGVKLQAANVLGSLCKEDELRVKVLLGGCIPPLLGLLKSSSAEGQIAAAKAIYAVSLGGARDHVGSKIFSTEGVVPALWEQLQNGLKNDSLVDNLLTGALRNLSSSTEGFWSATIAAGGVDILVKLLASGQSSTKANVCFLLACMMLEDASICSRVLAAEATKQLLKLLGPGNEASVRAEAAGALKSLSAQCKEARREIASSNGIPALINATIAPSKEFMQGEHAQALQENAMCALANISGGLSYVISSLGESLESCSSPVQIADTLGALASALMIYDSKA…
	176	UN000452	249	AATCGTGGCGCCACTTTGGAAATTATTGAGCGGAATACACTGCCACATAAATACAAACGCCTACGCCGCCCTAGCGAGTCGGATGAAGATGCTGAGAAGTGTGCCATATGTTTGTCGTTATTCGAGATTGAAAATGATGTGCGCCGCTTGCCTTGCATGCACCTCTTCCACACCGATTGCGTCGATCAATGGCTGGTCACGAATAAACATTGTCCGATTTGTCGTGTGGACATTGAGACACATTTAACC	83	NRGATLEIIERNTLPHKYKRLRRPSESDEDAEKCAICLSLFEIENDVRRLPCMHLFHTDCVDQWLVTNKHCPICRVDIETHLT
	177	UN000454	6480	ATGAGGGCGGGAAGCGCAGCGAAGCTGATTGTGGATGCGCTCCTCCAGCGCTTCCTTCCTCTTGCCAGGCGGCACATTGAAACCGCGCAAGCGCAGGATGGACAATACCTTCGACCGTCTGATCCAGCTTATGAGCAAGTACTAGATTCTTTAGCTATGGTGGCTCGACATACACCTGTACCCCTTCTAGAAGCTCTTCTTAGGTGGAGGGAAAGCTGCAGTGAATCTCCAAAGGGTGCAAATGATGCCTCTACATTCCAGAGGAAGCTCGCAGTGGAGTGCATATTTTGTTCTGCATGCATTCGCTTTGTGGAGTGTTGCCCTCAGGAGGGTCTTACAGAAAAGCTATGGACTGGACTTGAGAACTTTGTGTTTGATTGGCTAATCAATGCAGATAGG…	2160	MRAGSAAKLIVDALLQRFLPLARRHIETAQAQDGQYLRPSDPAYEQVLDSLAMVARHTPVPLLEALLRWRESCSESPKGANDASTFQRKLAVECIFCSACIRFVECCPQEGLTEKLWTGLENFVFDWLINADRLVSQFEYPSLVDLRGLLLDLVAQFLGALSRIRFSSVTERFFMELNARRIDSSIARSETLSIINGMRYLKLGVKTEGGLNASASFVAKANPLNRLANKRKSELHHALCNMLSSILAPLADGGKSQWPPLGVDSALTLWYEAVARIRGQLMHWMDKQSKHIAVGYPLVTLLLCLGDPQTFNNNFGPHMEHLYKLLRDKNHRTMALDCLHRVVRFYLSVYADYQPRNRVWDYLDSVTSQLLTFLKKGLLTQDVQHDKLVEFCVTIAESN…
	178	UN000461	6612	CTGTGCAGCTCATTTCTAGGGTCTCCCGTTCACAATTATGTTAGTCGGTGTATCAATGAAAATTCCAGTCATATGTCCAGGAGGTCAGAAACTGGAGCTTCTGTCAAATTCTTATTTACGAGGAAGAATCAAACCAGGTGTGAAAGACTCTGGTTTTCACAATTTGGTAGGACCAATGTTGAGTTTCCATTGCGGAAGTTAGGATTAAGAAGCATGTACAAAGTGAATTGCATGAAGGAGTCCTTCTCCAAAAGCAGGACTTTGATTAGATCATTTTCTCCCTTGTGGATGGAGGGGTTGTTGTTATTTAGGTGTTCTGTTTTTGCTGCTGTGATTTCTGTGGTCGGGATGTTGGTCTGGTATGGCCAGATAAAAGCTAGGGAATTTGTTGAGGCCCGG…	2204	LCSSFLGSPVHNYVSRCINENSSHMSRRSETGASVKFLFTRKNQTRCERLWFSQFGRTNVEFPLRKLGLRSMYKVNCMKESFSKSRTLIRSFSPLWMEGLLLFRCSVFAAVISVVGMLVWYGQIKAREFVEARILPHVCLTLSEYLQREIDLGKVQRVSPLGISLQSCSIGPNGQEFSCGAVPKMKLRVRPFASLRRGKIVVDAVLSRPSVLVVQKEDFSWLGIPSYSEAGLQSHCSNEEGIDFRTKMRRAAREEAAARCAADRKEAARQAAEMGYIVPELDPISSDNDGFKDGASDSTDFPSSSSFYCMDEKVHRRDHHYMDMGIEYGLKHADLEKTFGVNRNSPWHAFWSRMITNPIMHSLKRKVSRKEISEVGFALKRRNLERSAVAALAYFRGQD…
	179	UN000462	84	GAGAGGGCTTTCGCTCTCGACCGCGGGCCGCCCCTGGAATTCGTTGCTTTGTTCGCCCGGGCGGTGAACCATCGATCAAAACAA	28	ERAFALDRGPPLEFVALFARAVNHRSKQ
	180	UN000463	6195	ATGTTTTCCATCTCAGCTATAAACGACACAGATTCCAAAGGCCAATGGGAGCCCCTTGCGCCCACTAAAGAAGCTCAGGAATTTCATCTATCTCAAACTTACCATGAAGGACTTATTCAGCTGCAAGCTAAAGAATTCACAAAAGCTCGTGAACTTTTAGAATCTGTCCTAAAAGATCCTCTCATATCAAATGCACAGGTTGACAGTAATGCTAGTGATGGTCATTTATTACAGCTCAGGTTTTTGGCTCTGAAGAATCTCTCTTCTGTTTTCCTTCAACAAGGTTCCATGCATTATGAGAGCGCACTTTCTTGCTATCTTCAAGCGGTAGAGATTGATGCTAAAGACTCAGTTGTCTGGAATCAATTGGGAACATTGGCATGCACCATGGGCTTGTTT…	2065	MFSISAINDTDSKGQWEPLAPTKEAQEFHLSQTYHEGLIQLQAKEFTKARELLESVLKDPLISNAQVDSNASDGHLLQLRFLALKNLSSVFLQQGSMHYESALSCYLQAVEIDAKDSVVWNQLGTLACTMGLFSMSRWAFEQGLFCSPNNWNCMEKLLEVLIAIGDEVACLSVADLILRHWPSHSRALHVKSTIQESDPIPFAPRGIDKLEPKHVRLKFPEKRKRADESLDENVGLKRHKQIIDLYLPEVSWAAVVDATLNILSRRGSEHGAGCNQDDNEKLGCRRAKVMARNTATHVNGAGITSSETGDGSEKLDRRGNIRITIHLPSEYVMDSAEGEGVSPISAGENMSYSDCVSEKANVVKEKEACVDEEHPQERRSTRLERLRSRKPGKEELDFA…
	181	UN000464	6504	CAGGCAGGGAGCATTCGTGGAGTCATGGGTGGGAGCAACTTCTCCTCACCTCCCTCTTCCTCACCTATGCCTCAACAGTCAAGGAAGTTCCTAGACTTGTCTCAACAAAGTGGCGCTTCCCAGTTCCGTGAGGAGAACCAGATTAAAGGCCAGGGTGGGGAACAGCANCCACATCCAAACAATCAAGCTTACCTTCAGTATGCTTTCCAAGCTGCCCAACAGAAGCCTTACATGAATATGCAACCTCAGCAGCAAGGTAAAATGGGATTGGCGGGTCCATCTGGAAATGATCAAGACATGCGCATGAACAATCTGAAAATGCAGGAGCTTATGTCCATTCAGGCAGCTAACCATGCAGCCAACAAGACACCAGGATCTGTGCCGAAAAAGTCGGCGGAA…	2168	QAGSIRGVMGGSNFSSPPSSSPMPQQSRKFLDLSQQSGASQFREENQIKGQGGEQXPHPNNQAYLQYAFQAAQQKPYMNMQPQQQGKMGLAGPSGNDQDMRMNNLKMQELMSIQAANHAANKTPGSVPKKSAERFLQGEKQMEQGQTSADQRNELKPPQAVIGQLTAASMIRPPQSQQSHPSLQNISNNQVAMAQLQAVQAWALERNIDLSLPAHANLIAQLLPRWQSRGAAMQKPNENNVAMHPSRIPPPKQQIMSSQPVASDSSAHGNPLGDVTGQDATVKTRPTVSGPSTNANNIQMQQLVAQSQENQTERIARHPLTIGNGMPTMHPPKSSASMSQNADNLHGKSAISGSEAMQMQYFRHLQQLNRTSSQPAVSPSESSGSGSQPPSQGGSTVQA…
	182	UN000465	2256	AAGTACAAGAGTCTCTATAAGGGTGAATCGTACGACTGCATCGTCCAGGACCTGCAGCCCGGTCAGGTGTATGTAGTGCGACTTCAGGTTCACTATGAAAAACTGCAGGGATCTGCATCCGATCCAACCGAATTCACAACTCCGCCATGTGTGCCAGATCAGCCAGCGCCACCTAAATTAGTTATGCGAACAAAGAACTCTTTGCATTTGCGTTGGACGAATCCACTATCTAACGGATCACCCATTCAACACTATTTACTGGAATATGACGAGGGCAAAACTGGCTTGCCGGCAACTTACCGCTCTGCGCGCCAAAACACGGGAAGTGAAGTATTACATTTTGTCGAGGCAACGAAGACAAAAGGCAAACACTATACTCTCACTAAACTACAGCCTTCA…	752	KYKSLYKGESYDCIVQDLQPGQVYVVRLQVHYEKLQGSASDPTEFTTPPCVPDQPAPPKLVMRTKNSLHLRWTNPLSNGSPIQHYLLEYDEGKTGLPATYRSARQNTGSEVLHFVEATKTKGKHYTLTKLQPSTVYNFRLAAINEVGASLFSSICSYSTSSNPPSAPKPPKLQSSSSSSLRLWWERRPQDSDYVLQILDRESGHGYLNAFNGPDCVHECCQLRRATSYQFRLRAENEAGCSPWSNEVTFQTSPEKPGKPGKPHVKGKIHGTHFRTRWDPPTDRGGAEILRYFLEITSGTKFERIYSGTDTETTCDRLQPGTTYQLRTSCEGPAGLSPYSDVAHITSEAIVPAAPPPPYYDNPPGPYATVLRLDKPDYNGGAPVLEFEVQMRRPLDVHFD…
	183	UN000471	1098	TTCCTTCAACAATATGGCTTCAATATTCCATTATTGTTTCGTGAAAATGCAGGCTTGGGTTTACGTATGCCTGATGCCAATGAATTTACCGTGAATGATGTGAGGCTGTGCGTTGGATCACGTCGTATACTGGACGTAATGGATGTAAACACACAGAAAAATCTACAAATGACAATGAAAGAGTGGCAACAGTATTATGATAATCCACAAAAAGATCGACTACTTAATGTAATCTCGTTAGAGTTTTCCCATACACGATTAGACAATTATGTGCAATGTCCGGAAATTGTTCGGCAGATCGATTGGGTGGATGTAGTGTGGCCAAAGCGTTTGAAAGACGCTCAAAAGGAGGGCACAAATGTACTGGGAGAAATGATGTATCCAAAAGTACAAAAATAT…	366	FLQQYGFNIPLLFRENAGLGLRMPDANEFTVNDVRLCVGSRRILDVMDVNTQKNLQMTMKEWQQYYDNPQKDRLLNVISLEFSHTRLDNYVQCPEIVRQIDWVDVVWPKRLKDAQKEGTNVLGEMMYPKVQKYCLMSVKNCYTDFHIDFGGTSVWYHILKGSKVFWLIPPTEKNLQLYEKWVLSGKQADVFFGDTVEKCARVYLTAGNTFFIPTGWIHAVYTPTDTLVFGGNFLHSFGIVKQLKTAQVEDATKVPQKFRYPFFTEMLWYVLARYVYTLLGHSHLEGEPSVSEEEMAKRHHVHLTHYELFGLKEIVMYLYDLPPQRKNVPELVRDPVALIKDVRTLVERHCKDKPELAITGESVLKP
	184	UN000478	2280	CAAAGCAATGAAGATGATCTTGTATACGGATTTGGTGAAGTTGCTATTGAAGACTCCTTCAACAGCGATTATGATTCAGATGATGTTTCTCTAAATGATAATGCTGCGTCTGCGGAAAAGGTGAGCTTATTATGTCAGGCAGATGATGATTATCAGTATGAGGATGGAGAATTTCGGGAACCTGTCATACATTCTTGGGGAGAAGATGAGGGTGAGGAAAGGGAAGCAGAACGTGTGGATTATGGTTCAGACAATATAGACACTGATCCCTTTGAACCATCTGCAGATCATGGTGTAGTTGACCATGATGAATGCAAGGAAGAGACCCTATCAGAGGCCAGTCGTTTTTGCCAGGAAGGTAAACTGGATGGAGAGATGAATGAAAGAGAACCCAGTTGT…	760	QSNEDDLVYGFGEVAIEDSFNSDYDSDDVSLNDNAASAEKVSLLCQADDDYQYEDGEFREPVIHSWGEDEGEEREAERVDYGSDNIDTDPFEPSADHGVVDHDECKEETLSEASRFCQEGKLDGEMNEREPSCQPSLRGSLETKASPAEPGERRAMEFVRRFSRKDLGRKDDSEKLTMDVKVVSELNPGGDKVLVHEELGYRESCHSAILRMKSTGWDRLPDVSRNSRDAVVDVRGSGILKNRVTRLDSSDDRSLRRVFRPTSNRELSSRIDGPNCSDASVRKDKVYVDGNRSNNLDERDSGLAKSIGRGGSSGHLCGRGRAGNHSSESSGAHWGWNCHHSPGYYRPGDHGLPGPKNAAAAAAAKLESSGFVVAPDFTIVRAGAVTPDRVRRQSENSPS…
	185	UN000479	669	TTGCAGCGTAGTCTGCGATTCGATCCTCCGTTGCTTGATTTCGGCGAAGCGTGCCCGGTGGGAACTGCACGAGCACACACGGTGACATTAGTGAATCAGAATGCGAATCGTAGCGTATATTTGACTTCTGTGTCGGGACGTACACCTACATTTTACTCGAGCTTTTTTGAGGCGAAAGTAGTGCCGCCGCAAGGCAATACTACCTTCAATGTGGTTTTTCTGCCGCGCGTACATGGCAGTGTTTCAACGGATCTACTAATACATACGTCCTTTGGGCAGGCGCGTTTGCAAGTACGCGGCGAGGGACGTGATTGCCCGTATCGATTGAAACCGTTAGTGGGGATCAAGGCACCACTTAATGCGACGCTCACACCCGAGATCCAAATGTACAATCCACAC…	223	LQRSLRFDPPLLDFGEACPVGTARAHTVTLVNQNANRSVYLTSVSGRTPTFYSSFFEAKVVPPQGNTTFNVVFLPRVHGSVSTDLLIHTSFGQARLQVRGEGRDCPYRLKPLVGIKAPLNATLTPEIQMYNPHNKPLQILEVYSSGGQFQLELPSGGQEGPQTLWEIPPYETKSIIRIRFHARTVGNHTAYIRIKISEQVNENNADSTSNSGNVLVIPVEIEI
	186	UN000483	816	AAGGATCCCGCTGGTATCTTCGAGCTAATCGAGGTCGTCGGCAATGGCACCTATGGGCAAGTCTACAAGGGTCGCCATACGAAGACTGGTCAATTGGCTGCCATAAAGGTGATGGATGTCACCGAGGACGAGGAGGAGGAAATTAAATTAGAAATCAATGTGCTTAAGAAATACTCAAATCATCGTAATATTGCAACTTATTATGGAGCTTTCATAAAGAAATCTCCCCCTGGTAAAGACGATCAATTATGGCTGGTAATGGAGTATTGTGGTGCCGGGTCTGTGACCGACCTCGTCAAGTCGACAAAGGGTCAGAGCCTTAAGGAGGAATGGATTGCGTACATTTGTCGCGAAATATTGCGTGGTCTCAGCTACTTGCACTCAAACAAAGTTATACAT…	272	KDPAGIFELIEVVGNGTYGQVYKGRHTKTGQLAAIKVMDVTEDEEEEIKLEINVLKKYSNHRNIATYYGAFIKKSPPGKDDQLWLVMEYCGAGSVTDLVKSTKGQSLKEEWIAYICREILRGLSYLHSNKVIHRDIKGQNVLLTDNAEVKLVDFGVSAQLDRTIGRRNTFIGTPYWMAPEVIACDENPEATYDNRSDLWSLGITALEMAESQPPLCDLHPMRALFLIPRNSPPRLKSKKWSKKFHGFIDTVLVKDYHQRPYTEQLLKHAFIK
	187	UN000484	6309	ATGGACAATTCTGATGAAACCATGGCCACTGTTGCTCAATTTGTTGAGCAGCTACATGCCAACATGTCCTTACCACAAGAAAGGGAGTCAATCATGGCAAGCTTGCTTGGTCTTGCGAGATCAAGAAAAGATGGGAGAATTATTATTGGTTCCCACTCTCAAGCAATGCCACTGTTTATCTCCATCCTCAGGAATGGAACACCTGTTTCAAAATTGAATGTCGCTGCGACTTTGAGTGCCCTTTGCAAGGAAGAAGATTTACGGGTGAAAGTCCTTCTGGGAGGATGCGTACCTCCGTTGCTTTCTCTTCTGAAGTCTGGAGCTTCTGATGCCAGGAAAGCTGCAGCAGAGGCCATCTTTGAAGTTTCCTCAGGTGGATTGTCAGCTGACCATGTGGGG…	2103	MDNSDETMATVAQFVEQLHANMSLPQERESIMASLLGLARSRKDGRIIIGSHSQAMPLFISILRNGTPVSKLNVAATLSALCKEEDLRVKVLLGGCVPPLLSLLKSGASDARKAAAEAIFEVSSGGLSADHVGMKIFDTEGVVPTLWEQLNPKIKQDNVVQGFVTGALRNLCGDQDDYWQATLEAGGVEIIIGLLSSENEVTQSNAASLLARLMLAFGDSIPKVIDAGAVEALIRLLARENNISVRASAADALESISSKSARAKKAVVEANGIPVLIGAVVAPSKECLRGGSGQALSGHAIRVLANICGGMSALILYLGELCQSPRLLTPVADVIGALAYSLMVFEHASSTEEPFDVKRIEGTLLMLLKPRDNKTIRDHILEALASLYGNTHLLRWVDH…
	188	UN000485	834	ATGGCGGATCGGGGAACTATTGTTGCCCGTCCGATCTGGATGAAGCAGGCGGAGGAGGCGAAGCTGAAGAGCGAGGCGGAGAAGGCCGCGGCTGCTAAAGCGGCCTTCGAAGCCACGTTCAAGGACGTGGAGAAGGCTGCGGAGAAGGAAGCCGCCTCCTCCGACAGCGACGGGGAGGAGTCGGAGGACCTTTCGACCAAGCCCGTTGGTCCTGTCGACCCGTCCAAGTGCACGGCTGCCGGCGCAGGGATTGCCGGGGGCACTGCCTGCTCCCCGTCGTCCTTCGCTGTGACGACCAAGGATTCTGATGGGCGGAAGATCTCGAGTGGGGGCGCCGAGTTGAAGGTTAGGATTTCGCCGGGCGTAGGCGTTGGTGGGTCCGATCAGGATGGGATGGTG…	278	MADRGTIVARPIWMKQAEEAKLKSEAEKAAAAKAAFEATFKDVEKAAEKEAASSDSDGEESEDLSTKPVGPVDPSKCTAAGAGIAGGTACSPSSFAVTTKDSDGRKISSGGAELKVRISPGVGVGGSDQDGMVKDTGDGTYTVTYAVPKRGNYMVHVECNGKPIMGSPFPVFFSANTTGGLLGVSPSTPYPNLVNQTMPNMPNYAGSVSGAFPGLLGMIPGVVNGASGGVILPGMGASLGEVCREYLNGRCAKTDCKSSHPPHNLLMTALAATTTIGT
	189	UN000486	1263	CTTTCGACCAAGCCCGTTGGTCCTGTCGACCCGTCCAAGTGCACGGCTGCCGGCGCAGGGATTGCCGGGGGCACTGCCTGCTCCCCGTCGTCCTTCGCTGTGACGACCAAGGATTCTGATGGGCGGAAGATCTCGAGTGGGGGCGCCGAGTTGAAGGTTAGGATTTCGCCGGGCGTAGGCGTTGGTGGGTCCGATCAGGATGGGATGGTGAAGGACACCGGCGACGGGACGTATACGGTGACCTATGCCGTCCCAAAGCGGGGGAATTACATGGTGCACGTCGAATGCAATGGAAAGCCCATCATGGGCAGCCCGTTCCCGGTATTCTTCAGCGCCAACACGACGGGAGGGCTGTTGGGTGTGTCCCCATCGACCCCGTACCCTAATCTTGTCAACCAG…	421	LSTKPVGPVDPSKCTAAGAGIAGGTACSPSSFAVTTKDSDGRKISSGGAELKVRISPGVGVGGSDQDGMVKDTGDGTYTVTYAVPKRGNYMVHVECNGKPIMGSPFPVFFSANTTGGLLGVSPSTPYPNLVNQTMPNMPNYAGSVSGAFPGLLGMIPGVVNGASGGVILPGMGASLGEVCREYLNGRCAKTDCKSSHPPHNLLMTALAATTTIGTMSQVPMAPSAAAMAAAQAIVAAQALQAHAAQVQAQAKSAGNSSGSSDNVSKGDALKKTLQVSNLSPLLTVEQLKQLFGYCGTVIECSITDSKHFAYIEYSKPEEAMAALALNNMDVGGRPLNVEMAKSLPPKTAVGNSSLHQASLPMVMQQAVAMQQMQFQQSLLMQQTMASQQAASRAATMKS…
	190	UN000487	5946	TTAAAGGACCATTATAAAGAAAGCATAGCGTGGCTACAATGGCTAATGTTTGAGGAAGATCCACATAATTCTTTAACAAATCTGGCAAAACTGGGTGTTAGCCAACGTGGTGTGTGTGGGGCGGTCTGGGGCAAGAAAGACATTGCATACCGGTGCCGAACTTGTGAACATGACCCAACTTGTGCAATATGTGTTTCATGTTTCCAGAATGGAAATCATAAAGATCACGATTATTCGATTATATATACAGGGGGCGGATGCTGTGATTGTGGGGATGTGACTGCTTGGAAACGGGAAGGCTTCTGTTCAAAGCATAAAGGGGCAGAGCAGATCCAACCTCTCCCAGAGGAGATTGCAAATTCTGTTGAGCCTGTCCTTGATGCCCTTCTTGTGTATTGG…	1982	LKDHYKESIAWLQWLMFEEDPHNSLTNLAKLGVSQRGVCGAVWGKKDIAYRCRTCEHDPTCAICVSCFQNGNHKDHDYSIIYTGGGCCDCGDVTAWKREGFCSKHKGAEQIQPLPEEIANSVEPVLDALLVYWRDTLFATESTIRGSPRESNHTNLQGEAANTLSSVVVEMLLNFCNYSESLLAFVSRRMLPSVGLLDVLARSERFLRKKVVKKLHELLLKLLGEPIFKYAFAKAFINYYPTIVNETIKEGKDSAFETYQLLSTFSVQIFTVPTLTPRLVRELNLLDMLLGCLADLFRSCVGEGSLQVNKWADFYETTIRLLEDIRYVMSHVEVRKYVVHELSDISRTWAELLTIVQGMDPQKRVTGLHVEDENDNMHMPFVLGHFLGNIHSLLAAGAF…
	191	UN000488	5538	ATGGAGGAGGACCCACCATCGCCACTTATTGTCGATGGTAGAGTCTGCAGTATCAAATTCAGTATAGCCACCTTAGATGAAATTCGCAAATCGTCTATAAGTGATTCCTCCATCAGCCATCCGAGCCAACTGATGAATCCTTTTCTTGGTCTTCCAGTCGAGTCTGGGAAATGCGAATCTTGTGGGACATCTGAACATGGAAAATGTGAAGGTCATTTTGGATACATTAATTTGCCAATTCCTATATATCATCCTTCTCATGTTAATGAACTGAAACGCATTCTAAGCTTGGTGTGTTTGAAGTGCTTAAGGATAAAGAAGGGAAAGATGTTGCGCACTCAGGGAAACAAAAATTCTCGGAGTATCCAATGTTTGTCTTGTCAGGATGTACCCTCACTG…	1846	MEEDPPSPLIVDGRVCSIKFSIATLDEIRKSSISDSSISHPSQLMNPFLGLPVESGKCESCGTSEHGKCEGHFGYINLPIPIYHPSHVNELKRILSLVCLKCLRIKKGKMLRTQGNKNSRSIQCLSCQDVPSLSISEGKTADGAFFLELKLPSRSRLRDGFWNFLNRYGFPYRGDGSCRSLLPAEALKILSSFPEETKRKLSGKGYFPQNGFILESLPVPPNCLSVPDISDGTNIMSSDISVSMLRKVLNKVEIIKRSRSGIPNFESHEIEANDLQSAVSQYMHLRGTPKVPQDMTQKFGLVKEGDNSSTKAWLEKMRTLFIRKGSGFSSRSVITGDAYRGVNEIGIPIEIAQKITFEEKVTPLNLNHLQGLVDNKLCVTYRDGSATYAIREGSKGHTY…
	192	UN000490	1515	TTCCAGCTCACTCTAGCCAGCCCTGAAAAAATCTATTCTTGGAGTTATGGGGAAGTTAAAAAGCCAGAAACGATCAATTATCGCACCCTAAAACCTGAACGAGACGGCTTGTTTTGCATGAAAATCTTTGGCCCTACTAAAGATTATGAATGCTTGTGCGGTAAATACAAAAAGCCTCGCTTCAAAGACATTGGCACATGCGAAAAATGCGGCGTGGCGATCACGCACTCCAAAGTCAGGCGTTTTAGAATGGGGCATATTGAATTGGCCACTCCTGTAGCGCATATTTGGTATGTCAATTCCTTGCCTAGCCGTATCGGCACGCTTTTGGGCGTTAAGATGAAAGACTTAGAGCGCGTGTTGTATTATGAAGCTTATATCGTTAAAGAACCAGGCGAA…	505	FQLTLASPEKIYSWSYGEVKKPETINYRTLKPERDGLFCMKIFGPTKDYECLCGKYKKPRFKDIGTCEKCGVAITHSKVRRFRMGHIELATPVAHIWYVNSLPSRIGTLLGVKMKDLERVLYYEAYIVKEPGEAAYDNEGTKLVMKYDILNEEQYQNISRRYEDRGFVAQMGGEAIKDLLEEIDLITLLQSLKEEVKDTNSDAKKKKLIKRLKVVESFLNSGNRPEWMMLTVLPVLPPDLRPLVALDGGKFAVSDVNELYRRVINRNQRLKRLMELGAPEIIVRNEKRMLQEAVDVLFDNGRSTNAVKGANKRPLKSLSEIIKGKQGRFRQNLLGKRVDFSGRSVIVVGPNLKMDECGLPKNMALELFKPHLLSKLEERGYATTLKQAKRMIEQKSNEV…
	193	UN000493	1299	TGTTGCTATTTAAGGCGGTTTGCCCTAGGGTAATGAGCCCGCTGTGGACCGTAGGATCGAGGGTTTGGAGGATCAACGGCCTCGATTTCGTCTCCGGATGGAGGGAGGGATACACTCATGGATTATGATGACAGTGATTTTCGGAGCCAAAATTTTCAGTTAGGTGGCGAAGACAACAAATTTCCTCCAGGCCTACAATCATATGCTCTTCCAAAATTCGATCTAGATGAGCAACTTCATTTAAAGTTTGATAACTTAGTTGAAACAGAGGTTTTACTGGGCATCCCAAGTCAAGAAGAAAACCACTGGATTGAAGACTATTCACAGGGAAATAGTGGAATAGAGTTCAGTTCGAGCGCTGCTGAATCTTGCTCCATTTCAATGCGTAACAATGTGTGG…	433	CCYLRRFALG**ARCGP*DRGFGGSTASISSPDGGRDTLMDYDDSDFRSQNFQLGGEDNKFPPGLQSYALPKFDLDEQLHLKFDNLVETEVLLGIPSQEENHWIEDYSQGNSGIEFSSSAAESCSISMRNNVWSEATSSESVEMLLKSVGDDEMNTKKNINEESRVCEGLGSLDNQMDLCLNHDDSLPSKMEDAIDTDSMLPSDRGPKSTPGPSKDAAWNLPKADDMQHIEQDENSGFENLSDLDPISASEKYETYVNITAENCNLEKNIILSSVEKSAPNDHGSAACGMTRGSPDNNAVECVEVDALAASMKDSIVGAGVLNDQKNPREGTDGCSEVVFSCKSASLQKDDAQTGEIAVFSKDVLMDGQHRGEHPADGCTDEVKSASSLALNADXYR*M…
	194	UN000496	6321	TTGGATGATCCTGACTGTGCCATGGCTGCAGTGGCTCAGTTTATTGAGCAGCTACGTGCCAACATTTCGTCGCCGCATGAAAAAGAGTTGGTCACAGCACGTTTGCTTGGTCTCGCGAGGTCAAGAAAAGATGCAAGAGTTATAATCAGTTCTCATTCTCAGGCAATGCCATTGTTCATCTCGGTGCTGAGGACTGGAACACCCATGGCAAAAGTGAATGTAGCTGCCACTCTGAGTGCCCTTTGTAAGGAAGAGGACCTAAGGGTGCGGGTTCTTCTTGGAGGATGTGTTCCCCCACTGCTTTCTCTTCTAAGATCCGAAGCAACCAATGCCAGGAGGGCAGCTGCAGAAGCCATTTTTGAAGTTTCATCTGGTAGTTTGTCTGATGATCATGTGGGG…	2107	LDDPDCAMAAVAQFIEQLRANISSPHEKELVTARLLGLARSRKDARVIISSHSQAMPLFISVLRTGTPMAKVNVAATLSALCKEEDLRVRVLLGGCVPPLLSLLRSEATNARRAAAEAIFEVSSGSLSDDHVGTKIFVTEGVVPTLWDQLNPMINQDRVVEGFVTGALRNLCGDKDGYWKATLEAGGVEIIVGLLSCDNVSVLSNASSLLARLVLAFSDSIPKVIDAGVVKALLRLLGHGNDITVRASAADALESLSSKSTLAKEAVVEADGIPVLIGAIVAPSRECMQGEFGQALQEYAVHALANVCGGMSALILYLGELSQSSRLLSPVADIIGALAYSIMVFEEASAAEEPFNVNHIEDILVLLLKPRDNNLVQERVLEAQASLYSNTHLSRWLNH…
	195	UN000497	1668	AATGGTATACCTGATTGGGTGTATGAAGAGGAGGTGTTCAGCTCGAACACGGCCACATGGTTCAATCCGACTGGCACACAAATCGCATTCATCAAATTTGACGACTCGCCAATACGCGCAATGGATTTGCCCATCTATGGTGAGGCCAATGATCTGCGCTTCCAGTATCCACTCAGCAAATTGGTACCCTATCCGAAGGCGGGCTCCTCGAATCCGCGTGTCAGTCTCTATACTGTCGATTTGGAGCGTGCGGCACAAGGTTTAGAGTTTCTCACGCAGATTCCTGTGCCCAGTTCCTTAAACACTGAAACCGATTATATTATCTCGGCGGTGGAGTGGCTGGATAGCGAGCGCGTACTATCTGTGTGGATGAATCGTATACAAAACTTAGCGTATCTA…	556	NGIPDWVYEEEVFSSNTATWFNPTGTQIAFIKFDDSPIRAMDLPIYGEANDLRFQYPLSKLVPYPKAGSSNPRVSLYTVDLERAAQGLEFLTQIPVPSSLNTETDYIISAVEWLDSERVLSVWMNRIQNLAYLQVFDGVRRTEIYNIESKTGWVNLFTPPLKNRDGSRIAFILPQLQNDQTYYRHLCVLSTKTASGTVEILTRGKFVVENLLHWDADSDIIFYIANTEQSSEVAQLYAIKAELGRTPQCLTCDLHASGGVQQTYYEVSFSHERQMAISSEGPGVPMTVIYEWTPETDRVTLRKLLDWELNDELHTKLKSKAMPTHEIHTFPIADNFTAKVMLQLPPNLDRSGNTKYPLLVDVYGGPDSTSVISRWMIDWGTYLSSNQSVIYAMIDGRGS…
	196	UN000498	441	GATCTAAGTGGTCTTATTCTGTGTCCCGTGCTAGGAAGCATTATTCTTCTTTTCATTCCAAATTCAAGAATACGACTGATACGATTGATTGGTCTGTGCGCCTCTCTTATTACTTTTTTGTATTCCCTTGTTCTTTGGATACAATTCGATCCTTCTACGGCCAAATTTCAATTTGTGGAAAGCCTTCGATGGCTTCCTTATGAAAACATCAATTTGTATATGGGTATAGACGGTATCTCTTTATTCTTCGTGATATTGACCACATTTCTGATCCCTATTTGCATTTTAGTGGGTTGGTCTGGTATGAGAAGTTATGGGAAAGAGTATATTATAGCATTTCTAATTTGTGAATTTTTAATGATCGCCGTGTTCTGCATGCTGGATCTTCTACTATTCTAT…	147	DLSGLILCPVLGSIILLFIPNSRIRLIRLIGLCASLITFLYSLVLWIQFDPSTAKFQFVESLRWLPYENINLYMGIDGISLFFVILTTFLIPICILVGWSGMRSYGKEYIIAFLICEFLMIAVFCMLDLLLFYVFFESVLIPMLCGA
	197	UN000500	900	CAATATAAGAAAGATAGTTGGGAGGTAGCACGAGATCGTGTCATACAATTGTGTCCACTCGGTCAAGGCTCCTTCGGCATGGTGTACGAAGGTATACTCAAAGGCTCAAATGACAGTACCGAAGATACACCATGTGCCATTAAGACTGTAAATGAAAATGCAACCGATCGAGAGCGCATCAATTTCTTGAGCGAAGCCAGCGTTATGAAGCAATTCGATACGCATCACGTGGTGCGGCTGCTCGGCGTTTGTTCAGTGGGCCAACCAGCACTAGTCGTAATGGAGCTGATGAAGTTCGGTGATTTAAAGTCTTATCTACGTGCACACCGTCCCGATAGCATACAAGGAGATGAACTGCCGTTTAGGTACCGCGAGGCGGGCGTGCAGGCACCACCACTA…	300	QYKKDSWEVARDRVIQLCPLGQGSFGMVYEGILKGSNDSTEDTPCAIKTVNENATDRERINFLSEASVMKQFDTHHVVRLLGVCSVGQPALVVMELMKFGDLKSYLRAHRPDSIQGDELPFRYREAGVQAPPLSRVFQMAIEIADGMAYLSAKKFVHRDLAARNCMVGADLTVKIGDFGMTRDVYETDYYRKGDKGLLPVRWMPPESLRDGIYSTASDVFSYGVVLWEIVTLASQPYPGYSNDQVLRFVIEGGVMERPDNCPDKIYEIMQQCWEHRPSKRPSFFKIINTLFEHVDTDSEG
	198	UN000502	6522	ATGGCGACATCGATCGCTTCTCAGTTGCAGGCAATAAGAACTTCCACGCACAGAGAAGCAGAGCAGACGAAAAGACCTTTTACGCGCCCATCTGTCATCTTCAACCCCAAAGAGGCAGCTGACATAGATGTCGAAACAATCCTCTCCATCTCACTCCTCGGTTTGGAGGCTCTTATTGAGATAGATGCGCGATTTGACAGTTATAAAGGTACTCTTTTTAGCCAGAAGAGTCGAGAATTAGATAGAGAATTGATGGGAGCAGAAGAGAATGCGAAGATGGATTTATCGATTTCTTCGTATTTAAGGTTGCTTGCTGGATATTTGCATCTGCCTGCAGCTTTAAAGACACTGGAATACCTAATTCGGCGATACAAGGTTCACTTGTACAATGTAGATGAG…	2174	MATSIASQLQAIRTSTHREAEQTKRPFTRPSVIFNPKEAADIDVETILSISLLGLEALIEIDARFDSYKGTLFSQKSRELDRELMGAEENAKMDLSISSYLRLLAGYLHLPAALKTLEYLIRRYKVHLYNVDELVLCALPYHDTHAFVRIVQLLEIGNNKWGFLGGVKASGAPPPRKVIAQQCIRDKGVLEAICNYASPTKKFRHSKPVVCFCTAVIIEALGAVPTLDTDTVKRVIPFVFTGLDSRLKGGSDHKAGAMMIVGFLASRTTLASKLIQDLIIFIGRAAQQDAKESGDLPWLRLSVMTIICLVQSQSIRTLPKKCLEILKEIRDLAGLLEGLSKEFKIEKFLSVYLEALVDYSSSDDSCCFALITTIETVHIKDLVVNVVMKVLHACMKLSQ…
	199	UN000503	888	CATTCGTCAACATTTCAAGAATTGTATAAGCTGACGGGCGAAATCCTTGGCGAAGGCGCCTACGCCTCGGTACAAACATGCGTAAATATCTACACCGATTTGGAGTATGCTGTGAAGGTGATCGATAAAATACCAGGACATGCGCGTGCGCGTGTTTTTCGTGAAGTGGAGACATTCCATCATTGTCAGGGACATCCGGGCATTTTACAGTTAATTGAATTCTTCGAAGATGATGAAAAATTTTATTTGGTTTTTGAAAAGATTAATGGCGGGCCCCTTTTGAGACGCATTCAAGAGCAAATTTGTTTCTCAGAACACGAGGCAGCGCAGATTATCAAAGAAATCGCATCAGGCTTGGACTTTCTACACAAGAAAGGTATTGCACATCGTGATCTGAAG…	296	HSSTFQELYKLTGEILGEGAYASVQTCVNIYTDLEYAVKVIDKIPGHARARVFREVETFHHCQGHPGILQLIEFFEDDEKFYLVFEKINGGPLLRRIQEQICFSEHEAAQIIKEIASGLDFLHKKGIAHRDLKPENILCVYPDKLCPIKICDFDLGSGIKFTTDVSSPSATPQLLTPVGSAEFMAPEVVELFVGEANYYDKRCDLWSLGVIAYILLCGYPPFSGNCEKDCGWNRGENCRTCQELLFESIQEGRFSFPDTEWRDVSEEAKDLIRGLLVKEAPKRLSAEAVLNHSWIK
	200	UN000506	3123	CAAGCAGGCGAATTCGATTACTCTGGAGCACAAGCGATCAAGGCAATGAAAGAGGAAAAAATCCAAACTGTTCTAATAAATCCCAACATCGCCACTGTACAAACTACAAAGGGTCTTGCCGACAAGTGCTACTTCTTGCCACTGACTCCGAAATATGTTGAGCAGGTAATTAAAGCGGAGCGTCCTAGTGGCGTACTGCTTACGTTCGGCGGCCAGACCGCGCTCAACTGCGGTATAGAATTGGATCGCGCTGGCGTCTGGGCGAAATACAACGTTCAAATACTGGGCACACCCATACAATCGATTATCGAAACTGAAGATCGAAAGATATTTGCGGAACGTGTAGCTGAAATTGGTGAATGCGTTGCACCCTCGGAAGCTGTGTACTCTGTGCAGGAG…	1041	QAGEFDYSGAQAIKAMKEEKIQTVLINPNIATVQTTKGLADKCYFLPLTPKYVEQVIKAERPSGVLLTFGGQTALNCGIELDRAGVWAKYNVQILGTPIQSIIETEDRKIFAERVAEIGECVAPSEAVYSVQEALEAAKRLGYPVMARAAFSLGGLGSGFADNERELETLAQQALAHSSQLIIDKSLKGWKEVEYEVVRDAFDNCITVCNMENLDPLGIHTGESIVVAPSQTLSNKEYNMLRTTALKVIRHFGVVGECNIQYALSPHSEEYYIIEVNARLSRSSALASKATGYPLAYVAAKLGLGVSLPSIKNSVTGVTTACFEPSLDYCVVKIPRWDLAKFVRVSKNIGSSMKSVGEVMAIGRNFEEAFQKALRMVDGGVNGFDPDQHPLREEELTEP…
	201	UN000507	6789	ATGGATACTGGAAAATCTCTGGATGACCAGTTCTCCAAGTTGCATCCATGCTTCCCTGTCAATACAAGAATAGGAATAGTAGGTGCCGGTCCAAGTGGCTTGTCTGCTGCCTATGCACTAGCTCGACTTGGCTATAGCAATATAACTGTCCTGGATAAGTATCAAACAGTAGGTGGAATGTGTGAATCAGTTGAAATCGAAGGCAAAACGTATGATCTGGGCGGTCAAGTTCTTGCTGCAAACAGTGCCCCTGTTGTCTTTCACTTGGCCAAGGAATTAGGATGTGAACTTGAAGAGATGGACTCCCATAAATTTGCACTTATTGACGCTTCTACTGGAAAATATCAGGACATGGACGTGGCAGATGATTACTTATCTGTCATCTCACTAACATTAACG…	2263	MDTGKSLDDQFSKLHPCFPVNTRIGIVGAGPSGLSAAYALARLGYSNITVLDKYQTVGGMCESVEIEGKTYDLGGQVLAANSAPVVFHLAKELGCELEEMDSHKFALIDASTGKYQDMDVADDYLSVISLTLTLQDEAKGSGRIGVHALSAVASDLTPDFLKLRGFKSVPKSVAYGYTASGYGFVQDMPYAYIHEFTRTSMAGKIRRFKGGYMNVWEKLGQFLPVEGLCNTEVLAIQRNSGGIRMNIKNSNKDTEVLEFDKIIISGALPFSNGRTYRSSLSPADVESELMDMSGLEKELFSKVQTIDYYTTVLKIKGLENIPMGFFYFREFMEDPATIGHPVAMQRFYEDTDIFLFWSYGDSKDIMGQTVTKLVMDVVNNMGGEVEKVVLQRQFKYFPH…
	202	UN000511	258	AAAGTCGATTCTGGTGATTTTATTGTTGAGGTTGGAGACAAGTTGAAAGTTTATTACCATGAGAAGAAGGTAACATATGAAGCAAAAGTCATCGAAATTTCTGTTCAACGTGGCTTGCCGATGTATCTAGTTCATTATACCGGTTGGAACAACCGCTATGATGAGTGGGTGCCAAGGGAACGCATCGCTGAAAACATAACCAAGGGCTCAAAACAAAAGGGACGTATGTCGAATTTAAGTTCCGCCGAGAAACAAAAA	86	KVDSGDFIVEVGDKLKVYYHEKKVTYEAKVIEISVQRGLPMYLVHYTGWNNRYDEWVPRERIAENITKGSKQKGRMSNLSSAEKQK
	203	UN000513	5718	GATGATGACTCGAGCGAGCGGAAGATCAGCTCTTTCAATCGGAGAAAACCGGGTGAATTCTCTAGTAATATGTTTTCCTCAGCTCGGAGCAGTTCGCGCTCTTTGCCTTCGCTCTTCGGAGGCATCAAACCGAACCCTAAGCCGGGCGCCGCGCTCGCGGCCGCTGCTGCGGCTTCTCGATCAATTCCTACTCCTCATGCCGCCGCGATCAAGGTCAGAAGAGCGAGTAGTAAGATCACTATTCGTCGAGATTCCGCGGATTCGGAAATGGGAGTGGATGACGGTGATGGTTTTGAGAGATTAGGGTTAGCTCGTGATGGAGATTCGGTTGTTGTTGGATCTGAAATTGGGCACTTAGATGAGGAGATATTGGAAGGGGAAAATTATAAAGGGGAAATT…	1906	DDDSSERKISSFNRRKPGEFSSNMFSSARSSSRSLPSLFGGIKPNPKPGAALAAAAAASRSIPTPHAAAIKVRRASSKITIRRDSADSEMGVDDGDGFERLGLARDGDSVVVGSEIGHLDEEILEGENYKGEIAASARSEVGEVAESSHGSDEFHSVQEMQIKQADAPRVEEEDSMDSKLFVSTAVVEQQFSSEGDNACEVDLNHTHSGSTDVAEKDDDDSGEKDENSALLGSVTNLNEKNIPSSPQNENASIVDENPVLPILEKYDLDKIMPTDNNDGEVSHADDIASSRSHADDIASSRSHADDIASSRSDVAELLEDLSIQLDSKKASKKIAKKLRSSSKPLELAEELEKKYASSGLHWEEGAAAQPMRLEGIRRGPPAVGYLQVDPENAMTRTIS…
	204	UN000515	2415	GTGTGGGTGCCACATGAGAATCAGGGGTTTGTTGCTGCAAGCATTAAACGCGAACATGGCGACGAAGTTGAAGTGGAGCTTGCCGAAACTGGTAAACGGATGATGGTTCTGCGTGATGATATTCAAAAGATGAATCCTCCAAAATTTGACAAGGTCGAAGATATGGCGGAGCTGACCTGTCTAAACGAAGCCTCAGTTTTGCACAACATCAAAGACAGATACTATTCTGGCTTAATTTACACTTATTCTGGTCTCTTCTGTGTTGTAGTGAACCCTTACAAAAAATTGCCAATCTACACTGAGAAGATAATGGAACGGTATAAGGGTATCAAAAGGCATGAAGTGCCTCCTCATGTTTTCGCAATAACTGACACAGCCTATAGATCCATGTTGCAAGAT…	805	VWVPHENQGFVAASIKREHGDEVEVELAETGKRMMVLRDDIQKMNPPKFDKVEDMAELTCLNEASVLHNIKDRYYSGLIYTYSGLFCVVVNPYKKLPIYTEKIMERYKGIKRHEVPPHVFAITDTAYRSMLQDREDQSILCTGESGAGKTENTKKVIQYLAYXGCIETEGLGSGTSSGFNYW*TGATTFASQSHFGSFRKRQNCEER*FIPFW*IYSHKL*CVWLHFGCEY*NIFAGEISCHSSSQG*TNLPYILSITCRRFS*TT**IHTR*H*IISIPI*WQFACTRCRRFCRVPGDR*VNEHHGDDQRRLQFHFPYSERCAIIWLHEIPXQERX**SSNAS**HGGSEDCSFVV*A*QI*REPF*RLELRWAVISLXKSPN*GAGEFAVEAIAKAC…
	205	UN000522	6204	CCAGAGATCCCATGGCGAAGAGGCGTAAACTGGAAAAATCTCGACTTTATCCTTTCTCTTCAAGGCAAACAGCTCAGCACCCAAAGGAAGATCGAACTCGCTTTCGATTTCGTTACCTCTGCCCCTGCAAATGATTCCTGGGGTGATATTGACCCGCGTTTCGAGTCTGTTTCGATGTGGCGTTTGGTTTCTTTTCTCAACGAATGGATCCAGTCTCTTCTTATTTCTCTTGATAAGAAAGCTTCTGCTTCTGATATTGAGGAACTCGATCCTTGTTTGGATTCTCGTTCGTGGGGTGTTTTCAAATTTTGCCTGAAAGAATCATCATCTTCACAGCCCAGCTTTTCGCCGAATTTGCTCCGCGCGGTCTCTTGTGTAATTAGACATGCTCTTTTGGGC…	2068	PEIPWRRGVNWKNLDFILSLQGKQLSTQRKIELAFDFVTSAPANDSWGDIDPRFESVSMWRLVSFLNEWIQSLLISLDKKASASDIEELDPCLDSRSWGVFKFCLKESSSSQPSFSPNLLRAVSCVIRHALLGFTPGECLSLFEIVSECFVLLFSSHGQSFNASVDLWVTAADVSLSLVCKIFTENHWENNAGDVLLRLCSSVLQPFANYLRAHPSPKNAFPVVVDRLLEKLLAVLVLVNSPVIGSNCDFLTIIEDILLSGLFHPAHIDGFLSIRSSEKYVVKSEDSRTGVKESKAYIKSYHKHLFRKLEQLVSEKKPSVLGGLGQLLLLFVRRVKKQRGVPALTAGTEKMGKTEVSRHSEPADTRGKLEISVEKRISVSEKSSSMVNLDEEMCKSIFD…
	206	UN000523	5343	TTACCTGTTATTGAATCAATGGGAAAGGAACGCTCTTGAGCACAGTCCAGAGGTTACCAGAAATCAAGGAAGATTTGAAACTGTTGAGGCCCCTTTTAATTTGACTTTCTTGGTGGTCAGCAGCAGGACATGAGGAACCAACAACCAGGTGTTCCCCAACCTTGGTTGAGGCAGCAAACAGGGGTCAATGACATGCAGTTACGGCAACAGCATTTCATTTACAAGCAAATACAGGAGCTTCAGAGGCAGCAGCAACTTCAGCAACTAGATCAGGAAGTCAGGCAGGAAAATTCTTTGAATCCACTGTCTGGTGTTGCAAAACAGGCAGCCAGTGATCAATTACCCTCTTTAGCCAGTGGGGCCCCTATTCATGACACATCTAATTACATGTGGCCTGGT…	1781	LPVIESMGKERS*AQSRGYQKSRKI*NC*GPF*FDFLGGQQQDMRNQQPGVPQPWLRQQTGVNDMQLRQQHFIYKQIQELQRQQQLQQLDQEVRQENSLNPLSGVAKQAASDQLPSLASGAPIHDTSNYMWPGQPVVGDSRIPSSSQMLMVGNTNWAHRNGSPAMQGFSNGHMFAQDQSQASRSMGFLPQQLDQSLYSSPVVPTRGAFNQYSHFQGINNDGADMFSKSSGNQLDKTITQSAAFNVFESDQSAVFPTEICVSDGVSVSSQGFQAKNLFGHAPISTLHNGLLSGSFQQMNSLSRNVQVQEFHDRQEHRVGWEGNLQEKVAAQAEQPSLGLVTLDRTEAKILFNTDEGAWDNSFSRIGGMNSGGCIPGNQLEGNDNLSAFPSIQSGSWSALM…
	207	UN000526	645	AGGGAGGTGCAGCTGCTAAACAAACTATCCCACCCGAATATATTAAGTTTTATGGGTGTGTGCGTACAAGAAGGCCAGCTGCATGCGCTGACTGAGTACATCGAAGGCGGTTCGCTGGAGCAGCTGCTGGCTAACCAAGAGGCCGTGCTGACTGCTGGAATGAAATTAAGACTGGCGCTGGGTATAGCCAACGGTATGGCGTATGTGCATGATGCGGGGATTTTCCATCGCGATTTAACAAGCAAAAATGTGTTAATTCGCAATATGCCTGATGGGCAGTTTGATGCAGTGGTTGGCGACTTTGGTTTGGCTGCAAAAATACCAGATAAGCACGGCAAAACACGCCTAGACACGGTTGGTTCACCATATTGGGTAAGCCCCGAGTGCCTGAAGGGTCAG…	215	REVQLLNKLSHPNILSFMGVCVQEGQLHALTEYIEGGSLEQLLANQEAVLTAGMKLRLALGIANGMAYVHDAGIFHRDLTSKNVLIRNMPDGQFDAVVGDFGLAAKIPDKHGKTRLDTVGSPYWVSPECLKGQWYDQTSDVFSFGIIQCEIIARIVADPDVMPRTDAFGLDYLAFAELCPMDTPAVFLRLAFYCCIYEAKSRPTFHDAIKKLKQM
	208	UN000532	1251	ATGTCGTTTAAGAGCATAGTCCGCGAGCTGAGGGAGATGAGAGACGGGATTGGAAGCATGTCTAGGCGAGGAACAGAAGGGAAGCTGGTGCAGAGCCGAGCTCGGTCTCAGAATGCNNNAGGAGGAAACGTGTTCCGTTTCCACGGCTCATCAGGTCAGCAGAGCCGTTGGGCAAATCTACCTCCAGAACTGCTCCTGGATGTGATCAGGCGCGTGGAGGCGAGCGAGGCGTTGTGGCCTGCGAGGAAGCATGTGGTCGCTTGCGCGTCCGTGTGCCGATCGTGGAGAGAGATAACCAAGGAGATTGTCAAGACACCAGAGGAATGTGGAAGACTCACCTTTCCCATTTCATTGAAACAGCCTGGGCCGCGAGATTTGCCCATACAGTGCTTTATCAGA…	417	MSFKSIVRELREMRDGIGSMSRRGTEGKLVQSRARSQNAXGGNVFRFHGSSGQQSRWANLPPELLLDVIRRVEASEALWPARKHVVACASVCRSWREITKEIVKTPEECGRLTFPISLKQPGPRDLPIQCFIRRERATSTYRLYLGLNPALLGENGKLLLAARKIRRATGADFVISLVADDCSRASNTYIGKLRSNFLGTKFTIFDNQPPYDSAITSNRRSSRRIHSKQVSPRVPAGNYNIASISYEFNVLRSRGPRRMQCTMHSIPVSAIQEGGTAPTLTGFPNSLEEQLSTLSISKNKEPIVDFSSSSLSEPPISVPGLGEPLVLKNKSPRWHEQLQCWCLNFRGRVTVASVKNFQLVAAVEPSHQVSLAEQEKVILQFGKIGKDIFTMDYRYPLSA…
	209	UN000533	6450	ATGGCACACTTAGGTGGTGGTGCAGAAGCGCACGCCCGGTTCAAGCAGTATGAGTACAGAGCAAATTCAAGCCTTGTCCTCACGACCGACTCCCGCCCCCGCGATACCCATGAGCCAACCGGAGAGCCTGAGTCTCTCTGGGGCAAAATCGACCCTAAGAACTTCGGTGACCGCGTGTACAAAGGAAAACCTCCTGAACTGGAAGAGAAGCTGAAAAGATCCAAGAAGAAGAAGGAGCGGGAGCCTCTCACCTCAGAACCTGCCCAGAAGAGGGAGAGCAAGCGGCGCCGCATCCAAGAAGAGAGCGTCCTCTCCCTTGCAGATGATAGCGTGTACCAGCCCAAGACCAAGGAGACACGGGCTGCATATGAGGCCCTGCTCAGTGTCATCCAGCAGCAG…	2150	MAHLGGGAEAHARFKQYEYRANSSLVLTTDSRPRDTHEPTGEPESLWGKIDPKNFGDRVYKGKPPELEEKLKRSKKKKEREPLTSEPAQKRESKRRRIQEESVLSLADDSVYQPKTKETRAAYEALLSVIQQQFGGQPQDILTGAADEVLSALKNDKVKNPDKKKEIEKLLNPISSQLFDQLVSIGRLITDYQDGGDAAGPANAASDEALDDDIGVAVEFEEDEEEEDSDYDQVQEESDEEDDGPESNGNGAMQMGGIDDDDAEDTNEGLMLNVQDIDAYWLQRKISQAYEKIDPQHSQKLAEDVLKILAEGDDRDVENRLVMLLNYDKFDLIKLFLRNRLKIVWCTRLARAEDQEQRKKIEEEMIGRDLAAILEQLHATRATAKERQKNLEKSIREEA…
	210	UN000534	6018	CCATGGGAAGATCGCCTTCTACACAAGAACTGGAAGGTTCGGAACGATGCCAACATCGATCTCGCCGCCCTCTGCGATTCCATCTCAGATCCCAAAGATCCCCGCTTTAGAGATTTCGGTCCTCTTTTTCGGAAGACGGTGGCGGATTCTAATGCGCCCGTGCAAGAGAAGGCGCTTGATGCCCTAATTGCGTTTTTGCGTGCCGCAGATGCAGATGCTGGGAGGTATGCGAAGGAGGTGTGTGATGCCATTGTGGCGAAATGCCTCACTGGAAGGCCCAAGACAGTGGAGAAGGCACAGGCCTCGTTTCTTCTGTGGGTGGAGTTGGAGGCAACAGATGTGTTTTTGGAAGCTATGGAGAAAGCGATTAAAAACAAGGTCGCTAAAGCAGTTGTGCCA…	2006	PWEDRLLHKNWKVRNDANIDLAALCDSISDPKDPRFRDFGPLFRKTVADSNAPVQEKALDALIAFLRAADADAGRYAKEVCDAIVAKCLTGRPKTVEKAQASFLLWVELEATDVFLEAMEKAIKNKVAKAVVPAIDVMFQALSEFGAKVVPPKKILKMLPELFDHQDQNVRASSKGLTIELCRWIGKDPVKSILFEKMRDTMKKELEAELVNVTGTARPSRKIRSEQDKEPQQEAVSEVMGPGPTEESAANVPQEIDEYELVDPVDILTPLDKSGFWDAVKATKWSERRDAVAELTKLASTKRIAPGDFTEICRTLKKLITDVNIAVSIEAIQAIGNLARGLRNHFSGSSRFLLPTLLEKLKEKKPTLTEALTQTLQTMHASGCLTLADSIEDVRGAVK…
	211	UN000539	2652	AAAGCTGGTCAAACTCAGAATCAAGGACATCGAAACTACTTAAGGAGTTCTACTAGCCTTGATAGGAATCCTGGTCATTCTAAATTAAATGGTTCTAGTGATGCAATGAAATTCCAAAAGTTGGCCAAAACTATTGAAAATCCATGTGAAATATCATGGCCTATGTGTAAAAGGAGAAAGACTGACAGCCAATCCAATAATGTCTTCAATACTTCTCCAAGAGTAAGGAAAGCTAGGCCATATATGCAGCAGATTCATGAGAATAATATATGTCAAGCCTTGGAAAGTTCCAAAGATGCTTCAGAGGTTGTCCCAGAGTGTCAGCAGTTATCTTCATCTCATGAAATGGATGATGAGCAATTAAAGGTGGTCATTGAAAGCTCTGGGTTAGAGATGCAT…	884	KAGQTQNQGHRNYLRSSTSLDRNPGHSKLNGSSDAMKFQKLAKTIENPCEISWPMCKRRKTDSQSNNVFNTSPRVRKARPYMQQIHENNICQALESSKDASEVVPECQQLSSSHEMDDEQLKVVIESSGLEMHQKQKCCKTEGSELSPMLQSSDSTLQESEFESEDKAQCETSPVMTSIGITIQADGYSQGYSKEVGETMSEPNSVLEVKRWSDSDDGRDLVGNRLRQENRKSSEGIMEEMKSHIGDQDSFLSYSGSTSYNANLDFIGAEKSMPEFEGFSVGVPPETVVGSGINFDDLVHLDLSSITKERTSVLDQLCRSTSVFTPLPPQSMKYKIHVTPDVCQSLPNGLLEHMNLQKTLFFNPDDGKGSEDDVQADVSGCTGSVVDASFLGRSYSDFM…
	212	UN000543	303	CTCAAATCTTGTAATGAAATTCTCAAAGAGCTGTTTTCCAAGAAGCACTCGGGATACGCTTGGCCTTTCTACAAGCCCGTCGATGCGGAGCTGTTGGGGCTACACGACTACCACGACATTATCAAGAAACCAATGGATCTTGGCACAGTGAAGCGAAAAATGGACAATCGTGAATACAAAAGCGCGCCCGAGTTTGCCGCCGATGTGCGATTAATATTCACCAACTGCTATAAATACAACCCGCCAGATCACGATGTTGTTGCCATGGGCCGCAAGCTGCAGGACGTCTTTGAAATGCGCTAC	101	LKSCNEILKELFSKKHSGYAWPFYKPVDAELLGLHDYHDIIKKPMDLGTVKRKMDNREYKSAPEFAADVRLIFTNCYKYNPPDHDVVAMGRKLQDVFEMRY
	213	UN000549	2067	ATGCCACCTTCCATCTTCCCTCTCCGGTGGGAGAGTACAGGAGACCAGTGGTGGTATGCATCCCCCATCGACTGGGCCGCCGCCAATGGCCACTTCGACCTTGTCCGTGAGCTCCTCCGGATAGACACCAACCTCCTAATCAAGCTCACCTCCCTCCGCCGCATCCGCCGCCTTGAGATCGTCTGGGACGATGACACACAATTCGCAGATGTCGCCAAGTGCCGCTCAATTGTCGCCCAGAACCTCCTCCATGAATGCCAGATCAAGAAAGGGAAGAATTCTCTTATTCGCGCTGGATATGGAGGGTGGCTTCTTTACACTGCTGCCTCAGCTGGGGATGTAGAATTCATTCAGGAGTTGCTGGTAAGAGACCCACTTCTTGTTTTTGGAGAAGGAGAG…	689	MPPSIFPLRWESTGDQWWYASPIDWAAANGHFDLVRELLRIDTNLLIKLTSLRRIRRLEIVWDDDTQFADVAKCRSIVAQNLLHECQIKKGKNSLIRAGYGGWLLYTAASAGDVEFIQELLVRDPLLVFGEGEYGVTDIFYAAARSKNSEVFRLLFDYAVWPRCALRGGGELGEQKDGIPSVFKWEMMNRAAHAAARGGNLEILKELLAECSDVMDYKDAQGSTVLHAAAGRGQVEIVKDLVSSFDIITSIDNQGNTALHVAAYRGHLSVVEALIHASPSSISLTNNSGDTFLHMVIAGFRTPGFRRVDRQIELMNQLVNGQVVNLQEIINMKNNDGRTALHMAVIGNIHSNLVELLMSVPYIELNIRDINGMTPLDILRQHPRSASSEILIKQLISAG…
	214	UN000552	849	TCGCGACCAATACGGGAGCCGAAGGTGTTGAAAGGGCATGATGATCACGTGATCACATGCCTGCAATTCTCGGGTAATCGCATAGTGTCCGGCTCGGATGACAATACTTTGAAAGTGTGGTCGGCTGTGTCTGGCAGGTGTTTGCGTACGCTGGTTGGCCACACCGGTGGTGTCTGGTCCTCGCAGATGTCGGGCAAAATTATAATCTCAGGTAGTACCGATCGTACATTAAAAGTCTGGGACATGGATACTGGACAATGTTTGCACACGTTGCTGGGGCATACCTCCACCGTACGATGTATGCATTTACACGGCAATAAGGTCGTTAGCGGTTCTCGCGATGCCACTTTGCGCGTATGGGATATAGAGCAGGGGTCCTGCCTTCATGTGTTGGTCGGT…	283	SRPIREPKVLKGHDDHVITCLQFSGNRIVSGSDDNTLKVWSAVSGRCLRTLVGHTGGVWSSQMSGKIIISGSTDRTLKVWDMDTGQCLHTLLGHTSTVRCMHLHGNKVVSGSRDATLRVWDIEQGSCLHVLVGHLAAVRCVQYDGKLIVSGAYDYMVKIWHPERQECLHTLSGHTNRVYSLQFDGTHVVSGSLDTSIRVWDVETGNCKHTLMGHQSLTSGMELRQNILVSGNADSTVKVWDITTGQCLQTLSGPNKHQSAVTCLQFNSRFVVTSSDDGTVKLW
	215	UN000555	5766	TTCAAGAAGTCTGGTACTGGGCAGGGCGGGCAGTCTCGGATGGGCCCCACCACAACATTGAGTTCTGAAGCCAATGTTGTTGTTGCCACTACCCGAGCCACGCCGAATGGTGTTCATGTTGAATCACAATTGCATGATGTACCAGTGTTGGGTGCTGGCAAGCAGATTGATTCGTCTGTCCCGAAAAGCTCCCGAGCCCTTCCAAAGGCTCCATCTTCTCAATCGGCTTCTGCTGCGGCAGATACTTCTACTCCTGGAACACCATCTAAAGGAGATGTATCAAGGTCATTCCCTCTTCAGTTTGGATCCATAAGCCCTGGTTTCATGAATGGAATGCAGATACCTGCTCGGACTACCTCAGCTCCTCCAAATTTGGATGAACAGAAACGTGACCAGAAT…	1922	FKKSGTGQGGQSRMGPTTTLSSEANVVVATTRATPNGVHVESQLHDVPVLGAGKQIDSSVPKSSRALPKAPSSQSASAAADTSTPGTPSKGDVSRSFPLQFGSISPGFMNGMQIPARTTSAPPNLDEQKRDQNILQARHDSYKSIPTMSIPSAPKPQKKNVVSANQPNIVESHPSSQAKRDSQVQVPVAPIATTDQKSTATPITGISIPISYQQPQIPLQFGGPGAQLQSQGIRASSLQMPMLLPVGNATQVQQQIFVPGLQSHPLQPQGMMHQGQSLGFAPQMGHQLAPQLGNLGIGVTSQFTPQQQVGIFGGPRRTVKITHPDTHEELKLDKRTDMLSDVGSSGPRVHPHVPPQSQPIQTFSPAHPINYCSTIQPNSYNSSMFFQNPTSLPLTSAQM…
	216	UN000561	4422	CCTTATCAGCGCGTGCAATACAGTTCCTGTCTTAGTCCGGTTCAGTCTCCTGAAATGGAATCCGGTTCTCTTAATCAAGAAGTTCCAGCATCAGTAAGGAACATGAATTCTGTTGCTGAAATGGAAGAACCATCTCCTAATCAGTTTGGGTTTTGCATTAACAGGAGTGATGACGAGGATGATGGATATTACATGTATTGTTCAGATTCTGAAAGCAGGCAATGTCAGCCATCTGATTACTATGGCCCATTTGAGTTTGATCATATTGACCAAAGGTATAGATTGCATGATGTGCATCCTTCTGAAGGTAGCATTGATGCTAAGGATCTGACCTATTCAAGACTTGATAGTCAAGACTCACAAGCTTTGGTACACGCTGAAAAGATTGAGGAAGAAGCA…	1474	PYQRVQYSSCLSPVQSPEMESGSLNQEVPASVRNMNSVAEMEEPSPNQFGFCINRSDDEDDGYYMYCSDSESRQCQPSDYYGPFEFDHIDQRYRLHDVHPSEGSIDAKDLTYSRLDSQDSQALVHAEKIEEEAGHDNGDECRGASSVYGVESADATEPVDFENNGLLWLPPEPEDEEDEREAILFDDDDDEDATGEWKTLRSSSSFGSGEHRSRDRSGEEHRKALKIVVDGHFRALVAQLLQAENLPVGEEGGKEIWLDIITSLSWEAATLLKPDMSRGGGMDPGGYVKIKCIACGHRNESTVIKGVVCKKNVAHRRMTSKIKSPRLLILGGALEYQRVTNHLSSFDTLLQQEMDHLKMAVAKIGVHRPDILLVEKSVSRYAQDYLLSKDISLVLNVKR…
	217	UN000563	3387	GTTTTACTTCCTATATTTAGCAAAATTTCAGTAAACTTTACATTAGAAGTTATTGAAAAGGGATGTTTTAAATGGTCATCATCGCGACAAGATTTGATACTTATCACTCCCTTATATGAAGACATAGAGAGCGAGTGCTCCTATCGTGCAATGGTGACGGTATTAACGCATGAACCTCGTCACAATGCTGCCATTGTCTTGGCGGAGGATGTCAGCACAAGTGAAAATTTGCGGTGCGATGTTATACTCGACGTTATTGATAAATTAGCAGTGCGCACTACGTCGCGCCAACTATTCCTGGAGGAGGCGCCGGAGACGTTTGAGTTACGCGCGGAGGATTCACAAGGCAACGAGTTCACAACGCTGGAAGGTATTGAGTTCAGTTGGGTGATTTCTTCA…	1129	VLLPIFSKISVNFTLEVIEKGCFKWSSSRQDLILITPLYEDIESECSYRAMVTVLTHEPRHNAAIVLAEDVSTSENLRCDVILDVIDKLAVRTTSRQLFLEEAPETFELRAEDSQGNEFTTLEGIEFSWVISSLSSRSANKNWAPALRFLTFSESAYHVVPPALEKFEAQRMKGYMVLLEGINTGTAKVTISIPYPEYSHVPKMEVYINVLANIILEPSDVTLLPGDTINFRILQMKLGKLQEISLNDQYFLEIEDSNVASINGNSATASKLGKTVVVLRDRNAPIDEESSNLDSTLVKASTPSARVTVAEPVRLGLSLLPHNNWITVEGEKHEIALDLYTSDDQKITLGSRFSMQSELDDVLFYIISKNKNGSRIYGEAIREGVSPVYGSFKELTAQA…
	218	UN000567	2256	GCTGGCAAAATGGAAGCATTTCTGAACAGCACGATAAATGTATCCACTTTGCAGCTGCAGGCTGGCAAAATGCATGCGTTGCTCAACGCGCTTATGGTAACAAGGCGTATACGTGATAACGAATCGGCACTCAACCTTTTGACACGCGTTGTGGAGGGCTTGGTTGAAGGTCTGGTGAACATACCAGAGCACATCGAGCAAATGAAGTTGTACCGGGATATACATTTGCGCATATTGACCTTGTTGCAGAACACATTTGGTGCCGGAGTGACAGAGCGCGCAATTACGAAATGCATCTTCGATTTACGGGAGGAAGTGCGGTACAATGTGGAAGCGACCAAATTGCTTATAACTTCTCATTTCATCAATGTCCCACAATTCGATTTGTTGTTGCGGGAA…	752	AGKMEAFLNSTINVSTLQLQAGKMHALLNALMVTRRIRDNESALNLLTRVVEGLVEGLVNIPEHIEQMKLYRDIHLRILTLLQNTFGAGVTERAITKCIFDLREEVRYNVEATKLLITSHFINVPQFDLLLREAMDNGNNYMAVTFAMTLMERLLDGRSSATLETEMTGTFEMLGRLPQNRHRYPEALTHQIDMMDAGPFGGAERYLAGATQYMHSGMQHVRSNDCDDPPGLQEKTEFLLKDWVSIYNQSNNMSRETKIFTSFVQKMNMYGILKTDDLITRFFRQATQICIDLVYRILNDPNNSPLQARTKIFHWMDAFVHLIALLVRHSGESGNPTTKINLLNKVLGIVLGILLQDQELHGTAFQQLGYHRFFVMLFLELSSPDAVLESLMHSIMTAF…
	219	UN000568	885	CTTGTTAGACGAGATAACATTATTATCTATAGTGTCGGCCAACCCCTTGGATACCATGCATCATGGCCCCTATTCACGTTATCACATCACATGATAATGTGGCTAGCAGCAGAGCGGGTTTATCCCAAGAAGGTGTTTAGGGCCTATGCTATCCTTGGCGACGATGTCGTCATTGCATATAGTAAGGTTGCCGACGAGTACCAACGGATTCTTAGCGCCTTGGAGGTGGAAGTGTCTGCCTCCAAATCATTAATATCTAAATCTGGCGCATTTGAGTTCGCCAAAAGGTTCTTCGTGAAGCGAGGTAAGGTGGACCTGTCACCAGTGTCCCTCCAATCCTTGCTTTTATGTCGAACTACCTTAGGGCTAGCGACCGTCCGCAACACTTATAATATAAAG…	295	LVRRDNIIIYSVGQPLGYHASWPLFTLSHHMIMWLAAERVYPKKVFRAYAILGDDVVIAYSKVADEYQRILSALEVEVSASKSLISKSGAFEFAKRFFVKRGKVDLSPVSLQSLLLCRTTLGLATVRNTYNIKNLNVLLRLGGAGYRVLAKPHHLLSGRWKRLAVYLGKPDTSSPLIF*FWLGGGLPLNPYLKGRLVDWLRHKVAPKDICPPIWDDSPRGEGLMQGWESELMERTVVRGWMTKWLNWLHWYHSVALNPSVAITDLLEFPIVERSWKRRPVDPKIQRFGLTWRLYE
	220	UN000577	5340	ATGAGCCTGAGGCAGCGCCAACCGCTGCCATCCCATGGCGGACGAGCCCCCAACCGCCGCTCCTCATCGGTCGACGTCCCCGACGAAGAGATCTACAACATCATCCCCATCCACAACCACCTCGCCGACCACCCCTCCCTCCGCTTCCCAGAGGTCCGCGCCGCCATATCCGGCCTCCGCTCCGTCGGTGACCTCCGCAAGCCCCCCTTCGTCCCCTGGCGGGACGGCATGGACCTCCTCGACTGGCTTGGCATCTTCTTCGGCTTCCAAGCGGACAACGTCCGCAACCAGCGCGAGCATCTCGTCCTCCTCCTCTCCAACGCACAGATGCGAATATCGCCGCCTCCAGACGACATCGACGCCCTCCAACCCTCCGTCGTCCGCCGCCTCCGACGGAAG…	1780	MSLRQRQPLPSHGGRAPNRRSSSVDVPDEEIYNIIPIHNHLADHPSLRFPEVRAAISGLRSVGDLRKPPFVPWRDGMDLLDWLGIFFGFQADNVRNQREHLVLLLSNAQMRISPPPDDIDALQPSVVRRLRRKVLSNYTSWCDYLGQKPNVWISDGRSDPRRELLYVSLFFLIWGEAANLRFVPECLCYIFHRMAMELNRILEDYIDENTGRPALPSISGENAFHFQVVKPIYKTIQAEVDSSRNGTAPHSAWRNYDDINEYFWSRRCFDKLKWPIDGSSSFFVSGNRRKVGKTGFVEQRSFWNVFRSFDRLWIMLAIFFQAALIIAWHGGANKPWQVVGRRDVQVRLLSVFITWAALRLLQSVLDAGTQYSLISRETPWLGARMLLKILAATAWTLAF…
	221	UN000578	5103	GTCGGCGTCGTCTCCCCATCGGGCGATGCCCATCGCCCGCCGGAACCCCCGCTGGGCCCCAGTGATTCCGTCAAGGTCGACTGCGAGCGCGCTCTCACTGCCTTCCGCCGCGGCAACCACACCAGAGCCCTCCGCCTGATGAAGGAATCCGCCGGACGCCACGAAGGCTCCGCCCTCCTCCACCGCGTTCAGGGGACTATCTGCGTCAAGGTTGCCGCCCTCATCGACGACGCCAATGCGAAGCAGCGCCATCTGAGGAACGCGGTCGAGTCCGCCAAGAAGGCGGTAGAGCTCTCCCCGAATTCCGTGGAGTTCGCGCACTTCTACGCGAACCTCCTCTACGAGGCGGCCGCCGAAGGGAAGGGGTATGAGGAGGTGGTTCAGGAGTGTGAGCGTGCG…	1701	VGVVSPSGDAHRPPEPPLGPSDSVKVDCERALTAFRRGNHTRALRLMKESAGRHEGSALLHRVQGTICVKVAALIDDANAKQRHLRNAVESAKKAVELSPNSVEFAHFYANLLYEAAAEGKGYEEVVQECERALSIADPIDPAKESLQEESQQKLPTAEARVTHVQQELRSLIQKSNLASISTWMKNLGNGNGEEKFRLIPVRRLLEDPMEVRLGPTRRPNEIKKANKTPDERRKEIEVRVAAARLLQQQKSNSTQPQNDESANRPVEPSSGAHRVSERRKHANLRKIASSAERMDQVRGYWNSMSVERKQGLLEVSVCDLRAHWGSAKDGLALDVLSEALSFAESNKTWRFWVCCRCGEKFIDSESHIQHVVREHMGNLPPKLQSVLPQEVDGEWIEM…
	222	UN000579	1194	TGCTATAATGGCGCCCGAGACGCAAAGGAACTGGATAACTTCCTATGGGACATGGAGCAGTACTTCCGAGCCACTCGGCCAGGCTCAGAGGATGCTATGGTGTCGATGGCAACAATGTATCTCACCTGAGATGCAAAACTATGGTGGCGCACGAGGTATGAGGACGTCCAGAGTGGGCGTTGCACGATCGACACTTGGGAAGATCTCAAGAGAGAGCTTAAGGCTCAGTTCCTGCCCGAGAACGTTGAGTACCTTGCGAGGAAGAGTCTTAAACGACTCAAACAGACCGGATCGGTGCATTTTTATGTCAAGCAATTCTCGGCGCTGATGCTTGACATCCGAGACATGTCGGAGAAGGACAAGCTCTTTGATTTCCTGGATGGCCTCCAGCCATGGGCA…	398	CYNGARDAKELDNFLWDMEQYFRATRPGSEDAMVSMATMYLT*DAKLWWRTRYEDVQSGRCTIDTWEDLKRELKAQFLPENVEYLARKSLKRLKQTGSVHFYVKQFSALMLDIRDMSEKDKLFDFLDGLQPWAEAELQRRGVQDLASAQAAAETLVEYGHKTESSTKTKPATKP*KGKGSMGDRKTHEKETSKKGHDAKTGPQNSGWNTGSFIFICNGAHRACPQKQSLNTLQAQSSGEEPRMGACWLLNAI*GQTEVAKPQARELMYIDVCINGKSTRAMVDTGATHNFVADQEARRLGLKLEKDSSKMKAVNSEARPIAGLAKGVSIRIGPWAGTTNLMALPIDDFQVI*GMEFLHTV*AVPMPFMRVVCLMSEEAPCMIPTVKVGKEKVEIISAL
	223	UN000580	1644	GGAGGCTTGGACAAGGATGTATCTGAAGAAGATCTGAAGAAAGTCTTTAATGCAATTGGCGAAATTACTGAAGTAAGGTTAATGATGAATCTGCAGACGAAGAAAAACAAGGGCTTTGCATTCTTACGTTTTGCAACTGTTGAACAAGCAAAGCGAGCTGTTTCAGAGCTAAAGAACCCAGTGATCAATGGGAAACAGTGCGGTGTCGCCCCAAGTCAAGACAATGACACACTCTTTGTTGGTAACATATGCAAGACATGGACTAAGGAAGCTTTAAAAGAGAAGTTGAAACATTATGGGGTTGAAAATGTTGAGGACTTGACTTTGGTTGAAGATACTAGCAATGAGGGTATGAATCGGGGGTTTGCTTTTCTGGAGTTTTCATCCCGTACAGATGCC…	548	GGLDKDVSEEDLKKVFNAIGEITEVRLMMNLQTKKNKGFAFLRFATVEQAKRAVSELKNPVINGKQCGVAPSQDNDTLFVGNICKTWTKEALKEKLKHYGVENVEDLTLVEDTSNEGMNRGFAFLEFSSRTDAMNAYKRLTKRDVVFGVDRPAKVSFADSFIEPDDEIMAQVKTVFVDGLPASWDEDRVKEHLKKFGLIEKIELARNMPSAKRKDFGFVTFDAHDAAVACAEGINNQDLGEGDHKVKVRARLSRPHQKGRVRRDIREDQWFGRGISRGGRGSWAPAPLRRFPGRGAGGVGGYKPPLSSHGFRRPSVVRDRRPVVAAPVRARHLPPPPARSYDRRPIVPPYPKSNSKRDFGRREEVPPRSRAAINYGSRVATERRSYKHDDYPSRGSGYS…
	224	UN000584	5577	GATTCTGAGAGAAGGAATGGTTGGCCATCTTCACAGATAAATCTCTGCACAAACCAAGCACAAGTAAACTTGAGACCCGAGTTTGTGGAAAACCAACCTAGAAACCAACAACAATTCAGATTAAATGGATTTTTGCAGGGTCCTCTGGGTTTTCAAACGAGGCCCAACCAGTCAGAGTTTATCAGGGAAGCCACAGACCCTGAAAGAAACAATTTGACACCTAGAAATGTAGTTATTCTTGAATCACAGCAAGGGAATGCTCTTTAGAAGAATTCAGGCAGTACAAGAATTTCAGGGAGACTTGAAACTGTTGAGGTACCGGTTAATTTTGACTTTTTTGGTGGTCTGCAGCAGGCCATGAGGAACCAACAACCAGGTCGGCCCCAGCCTTGGTTGAAC…	1859	DSERRNGWPSSQINLCTNQAQVNLRPEFVENQPRNQQQFRLNGFLQGPLGFQTRPNQSEFIREATDPERNNLTPRNVVILESQQGNAL*KNSGSTRISGRLETVEVPVNFDFFGGLQQAMRNQQPGRPQPWLNQQPGVADMQLRQQQLLYRQMQELQRQQHLQQLDQEARQQNSLSSLSAIAKQASSDQLPSLVNGVPIHDASNYMWPGQPMGGDSRIPSSSQMLIGGNANWMHRNGSPAMQGYQNGIMFPQEQNQVFRSMGFVPQQLDQSLYGAPVATSRDSLNQFPHFQGISNDGVDTITKASGNQLEKPAAQSATFNAFQSDQSAEFPNQAGISDGVSVSRQGFQGKDLFGHAPIQSLHNGLLSENFQQVNPLSRNVNVQEFHDRQERVGWDGNLQ…
	225	UN000585	4752	CATCAGCAGCTGATGGACTCTCTCACTGCACACATCGCTCTCTACCACTCCTCCATCCCATCTTCTTCTTCTCCATCTCCATCTAACCCTAGCAGAAACCTCATCCTCCGCTGGTTCTCCTCCCTCTCCGTCCCCCACCGCCAGTCCTCCCTCACCGTCGTCGACCCCGATTTCCTCCAGATCCTCCTCCAGATGCAGCGCCACCTCCTCCGCCAAGGCCACGGCTTCTTCATCCTCCTCCCCGATCTCCCCTCCCCTGCCCGCCCCTCCCTCCCATCCCTCTGCTTCCGCCGCTCCCGCGGTCTCCTCTCCCGTTCCGCCGCCTCCAACGCCTCCCTACTCGCCATCTCCTCCTCCATCCGCATCTTCGCCTCCAAAGAAGGAGAGCCCATGCCCCCC…	1584	HQQLMDSLTAHIALYHSSIPSSSSPSPSNPSRNLILRWFSSLSVPHRQSSLTVVDPDFLQILLQMQRHLLRQGHGFFILLPDLPSPARPSLPSLCFRRSRGLLSRSAASNASLLAISSSIRIFASKEGEPMPPACFPSLDSLDSITVSDDLVADVDRFVSIMDEVSGGGFLRADDGGLDSSWCELPWLKAKGYYSVQAFVANRIELALRVAWLNCNGGKKRGAKSKDKEKAAGVIAGVAANVFWRKKGCLDWWSGLDPGTRRDMLSRVLGRAAKSLANEIVEGANQAAKDEKWFFDIGAEPQLRYGSTSSRQRNMQALSGIDADVSLGIIPASISGKPSSLANACNRLLVLQEISTIMLACQHNEYEKEKLFFSMLGSVHTVSDCLFRRLRGLLMVVSN…
	226	UN000588	5724	ATGGCACCGAGGAACAGTCGCGGAAAGTCGAAGGGTGAGAAGAAGAAGAAAGAAGAGAAGGTTCTTCCTGTGGTCTTAGACATCGCCTTAAACCTTCCCGACAACTCTCGCGTCATTCTTAAGGGTATATCGACTGATAAGATTATAGATGTGCGAAGACTGGTTTGTGTGAACATAGTTACTTGTACCATTACCAACTATTCTCTATCACACGAGGTCCGAGGGCAGCGATTGAAGGATACGGTGGACGTGGTTGCTTTAAAGCCGTGTGTTCTGACATTAGTCCAAGAGGACTACGACGTGGAATCTGCGCAGGCGCACGTTAGCAGGCTGCGGGACATCGTTGCGTGCACCTCCTTTTTCGGTGCTCCAGCAGCAGCGGCGGCGGCGGCGGCGGCT…	1908	MAPRNSRGKSKGEKKKKEEKVLPVVLDIALNLPDNSRVILKGISTDKIIDVRRLVCVNIVTCTITNYSLSHEVRGQRLKDTVDVVALKPCVLTLVQEDYDVESAQAHVSRLRDIVACTSFFGAPAAAAAAAAAAANKGEDLKCAGGAQDKPRKSSSEEDGEMSGGVCPSLAAFYDFFSLSHLIPPLQFIRHATKQRCDESLSEDHLFLFEVKLCNGKLVVIEACRKGFYSVGKQRILCHNLVDLLRQLSRAFDNAYDDLMKAFSERNKFGNLPYGFRANTWLVPPVAAQSPSVFPPLPVEDETWGGNGGGLGRDGKSDMIPWANEFSCLASMPCKTAEERQIRDRRAFLLHSLFVDVAIFSAVSAVQKVMEEPDSKHSVAEDKILHVEQVGDLIITIKK…
	227	UN000592	6192	AGAAGAAATCCTTGATCGAATGCTAACACGGTTGGCCCTCGCGGACGATTCGAAGCTCCAAGGTCTCCTCTCAAAGATCCTCCCTTATTGCATCTCTTCTCTCTCTTCTCAATCTCAATCGCTCAGAAAGAAGGTAATGGAGATCCTTAGTCATGTAAACAAGCGAGTAAAGCACCAACTGGAGATTGGCTTGCCTTTGATGGAGTTATGGACAATGTATCTAGAGGCAAAAGCAGCACCTATGGTTAAGAATTTTTGCATTGTGTATCTTGAGATGGCTTTTGAGCGTACACCTGCAGAGGAGAAAGCAAATTTGGCTCCGGAGTTGGTAGCTAATATTTCAAAATTCCCCCCTCAACATCAAGACATTCTTCTGAGAATTGTTGCGAAGGTGATTGG…	2064	RRNP*SNANTVGPRGRFEAPRSPLKDPPLLHLFSLFSISIAQKEGNGDP*SCKQASKAPTGDWLAFDGVMDNVSRGKSSTYG*EFLHCVS*DGF*AYTCRGESKFGSGVGS*YFKIPPSTSRHSSENCCEGDWGMPLKSC**KYCCKVQTDGWCCGQADICRILPPDNFVSATVSRWELSSRAFNCSVRSYYW*SSTER*STFKKKVRYAKCDCGNGAISRACLPYLFSCLLGQSRTRH*ERRRSFEEKCCQCQLGRSGPD*EIVFTI*WYFCS*KH*CKFKDQSWELHLENSTDVCFL*VCCCSKCFSIHIAVHFWLHLWKWDHIKVEAVGYGIHCLGVQTCINGSAEVHGSCYIEWNYPIT*WTFK*RIRFDGQRCQKICVSSDWVTFTAHASTF*R…
	228	UN000600	5424	ATGGCGGAATTAGGGCAGCAGACGGTGGAATTCTCGACGCTTGTCCGCCGTGCGGCGGAGGATTCGTTCCTATCGCTCAAGGAGCTCGTAGAGAAGTCGAAGTCGTCGGAGCAGTCCGATTCCGAGAAGAAGATCAGCCTCCTCAAATACATCGTAAAGACGCGGCAGCGCATGCTCCGCCTCCACGTCCTCGCCAAGTGGTGCCACCAGGTTCCATTGGTTCAGTATTGTCAGCAACTTGCAGCTACTCTTTCAAGCCATGACACATGTTTCACCCTAGCTGCTGATTCTCTGTTTTTCATGCATGACGAGCTGCAGCAAGCTCGGGCTCCTATCTACGATGTTCCCTCTGCTATTGATGTTCTCCTTACAGGAAATTATCAGCGATTACCAAAATGT…	1808	MAELGQQTVEFSTLVRRAAEDSFLSLKELVEKSKSSEQSDSEKKISLLKYIVKTRQRMLRLHVLAKWCHQVPLVQYCQQLAATLSSHDTCFTLAADSLFFMHDELQQARAPIYDVPSAIDVLLTGNYQRLPKCIEDMGSQSTLTEEEQVPTLKKLDTLLRSKLLEVSLPKEISKVTVSDGTALLCVDGEFKVLLTLGYRGHLSMWRILHMELLVGERSGPVKLEEMRRHALGDDLERRMAASDNPFVILYSILHELCVALIMDTVMRQVQALRQGRWKDAIRFELISEGTTGQGVNAGSMQLNQDGDSDSAGLKMPALKIMYWLDFDKNTAGSDSTSSPFIKIESGQDLQIKCIHSAFVVDPQTGKEAEFSLDQSCIDVENLLLRAIACNKHTRLLEIH…
	229	UN000606	885	ATGGAACTGAGAGTTGGCAATAAATATCGCCTGGGTCGTAAGATCGGCTCAGGTTCGTTTGGCGATATTTACCTAGGCACCACAATAAACACAGGCGAGGAAGTCGCCATAAAACTTGAATGCATACGCACGAAACATCCCCAGCTACACATCGAGTCAAAATTCTATAAAACCATGCAGGGCGGCATTGGTATACCGCGCATAATCTGGTGTGGGTCGGAAGGTGATTACAATGTGATGGTGATGGAATTGTTAGGCCCATCATTGGAAGATTTATTCAATTTCTGTTCACGTCGCTTCTCACTAAAAACAGTACTATTACTCGCCGATCAGATGATATCACGCATCGATTATATACATTCTCGTGACTTCATACATCGAGACATAAAACCGGACAAT…	295	MELRVGNKYRLGRKIGSGSFGDIYLGTTINTGEEVAIKLECIRTKHPQLHIESKFYKTMQGGIGIPRIIWCGSEGDYNVMVMELLGPSLEDLFNFCSRRFSLKTVLLLADQMISRIDYIHSRDFIHRDIKPDNFLMGLGKKGNLVYIIDFGLAKKFRDARSLKHIPYRENKNLTGTARYASINTHLGIEQSRRDDLESLGYVLMYFNLGALPWQGLKAANKRQKYERISEKKLSTTILSLCKGFPSEFVNYLNFCRQMHFEQRPDYCYLRKLFRNLFHRLGFTYDYVFDWNLLKF
	230	UN000608	6732	CTTTTATCTCTTGTACAAGATGTCGATTGTACTCATTCGGATCTTCTGTTTTCTGCTGTGAAGACTCTGCAAAAGTTGATGGATTACAGTTTTGCAGCAGTCTCCTTGTTTAAAGATCTTGGAGGCGTGGAACTTTTGGCTCATAGGCTACAGACTGAGGTGAACAGAGTTGGCACGGATTCTGAAAACAGTGTTTCAGTGACCACTGAGAATTTATCAAAAGTTGATGACAGCATGTTTAACTCTCAGAAGCGGCTCATCAGGGCCTTCCTGAAGGCACTCGGATCTGCTTCTTATTCTTCACCAAACTCTACAAGGTCCCAAAACTACTATGACAATTCCTTGCCTTATTCTTTATCATTAATATTCCAAAATGTAGATAAGTTTGGAGGCGACATC…	2244	LLSLVQDVDCTHSDLLFSAVKTLQKLMDYSFAAVSLFKDLGGVELLAHRLQTEVNRVGTDSENSVSVTTENLSKVDDSMFNSQKRLIRAFLKALGSASYSSPNSTRSQNYYDNSLPYSLSLIFQNVDKFGGDIYFSAVTLMSEIIHKDPTCFSMLHELGLPDAFLSSVSSQILLSSKALTCIPCGLGAICLNSKGLEAVRKTHALRFLVETCTTRKCLLAMNRGVVPLSSAVEELLRHVPTLRSTGVDIIIEIIEKLSLLGKDICTGSSSNIEGGTEMETDPQYKDSSCHEDLLDGADPTADGVSNEQFVRLCIFHVMLLVRRVMENSENCRLFVEKKGIEALMKLLLQPSIVQSPEGMSVALHSTMVFKGFTQHHSTPLAHAFCSSLRDHLKKALSGF…
	231	UN000613	3291	ATGGAAGAGGAAAGTTCTCTTGAGCTTGTTCAACGTTATCGGCGTGATCGGCAAATATTGCTAAATTTTTTACTGTCAGGTAGCTTGATTAAGAAAGTTGTCATGCCTCCAGGTGCAGTTTCATTAGATGATGTGGACCTAGATCATGTCAGTGTTGATTATGTTCTCAACTGTGCTAAGAAAGGTGAAGAGCTTGAACTCTCAGAGGCTATTAGAGATTATTATGATAGCCTTGTCCTTCCTCCTAGTATCTATACTGGATTTACTGAAGAATTCTTTTTGGTAACAAATCCTGAATCATCAGGATCGCCGCCAACACGTGTGGCACCACCTGTTCCTGTCTCACTATCTTCACCTATATTGACAAGTCTATCAAAATCACAGTCCCTTCATTCCCCA…	1097	MEEESSLELVQRYRRDRQILLNFLLSGSLIKKVVMPPGAVSLDDVDLDHVSVDYVLNCAKKGEELELSEAIRDYYDSLVLPPSIYTGFTEEFFLVTNPESSGSPPTRVAPPVPVSLSSPILTSLSKSQSLHSPQFQELSVDDIEDFEDEDVEEEIDSLRVSRRNPNDVSDLLLRLPSFETGITDDDLREAAYEILLASVGAAGGLIVPSKEKKKEKRHKLMRKLARSKSDQAPQSQRASGLAGLLETMRVQLEISEAMDIRTRQGLLDALVGREGKRMDTLLVPLELLCCISRTQFSDKKAYLRWQKRQLNFLEEGLLNHAAVGFMESGRSANDLRNLLRKIEESESLPPSACEVQRTECLRSLREICVSLSERPARGDLTGEVCHWADGYHLNVSLYQ…
	232	UN000621	5649	CCTGTTGAAGAAAATGTATATGAAGATGTGAGTAGAGAAGAATCATTTGAGGATGCCGCGGACGAGCTAAGCATTGATGGGAGGATCTCTGATGGTGGGGTGTTAGAGGCGACGGCTGAAAGCCAGGAAAGCTTGGGGAAGGATCTTGATATTAAAGTGGTGCAAGACAGGGAGCTGCAGGTTGGAGAATTAATGGATGAACTAGTGCTGGTGCGGGCTCAGCTGGAAAGGACTGTTGTGGAGAAAGAAAACATGGCACGTGAATGTGTCGATTATAAGGGAGAAAGAGAGGTGCTTGCAAGAGGGCTCGCGAATCTTCACCACGAGCTTCAAATGCTGTCTAACCAGCGTTCATTACAGACAGAGAACAGAGAGGAACTGATCGATCATCTTCGTCGC…	1883	PVEENVYEDVSREESFEDAADELSIDGRISDGGVLEATAESQESLGKDLDIKVVQDRELQVGELMDELVLVRAQLERTVVEKENMARECVDYKGEREVLARGLANLHHELQMLSNQRSLQTENREELIDHLRRTEKGDSWGKTLVSDMPLGAVIDDCSKFTSSLKSVLDEQLQSEGTVRELHAILFTKDQEIEDLSARVSELSVSCDVYVSYMDSLQKSLKDSFHARHKGDMHLEDITNKLLASLSSVVQQDDVSEYSVNEKISLVENSTAFLIGNYMKFLSEINNLGHCLSGLSSDFSMPEDKEFDVVLGIACEKLLECKRNEVDLLEKVNKMEEENAKLLAELEKTKGSLDEANIASSKTKTDLEQAETKLAAAREKLSMAVTKGKALVHQRDSLRQ…
	233	UN000623	5400	ATGGCTGGGGCTGCGGGGGGTTTTGTCACTCGCTCCTTCGAATCTATGCTGAAGGAGTGTTCTGGAAAGAAGTATGGAGAACTTCAGAAAGCTATTCAGACTTATTTAGATAGCACAAAGGAGATCAATTCTCCATCCATTCCGGTTGAAAAAATTGAGACAGCATCTTCAGCTGGGGATGAAAGCACTGTTGGGGCTGAAACTGTGAAAGATGGAGTAAGTTCAGATGCTTGCAACTCAGTTTCAGCTACAGATGGAGCGATGGGTAAATCAGCAGGCATAAGTACATCTATCACTGCTGCCTTAGCAAGTGCTGGACACACTATAGAAGGGGCTGAGTCAGAGCTTGTTCTACAGCCACTTCGTCTTGCCTTCGAGACAAAGAATATAAAACTCGTA…	1800	MAGAAGGFVTRSFESMLKECSGKKYGELQKAIQTYLDSTKEINSPSIPVEKIETASSAGDESTVGAETVKDGVSSDACNSVSATDGAMGKSAGISTSITAALASAGHTIEGAESELVLQPLRLAFETKNIKLVEPALDCLHKLIAYDHLEGDPGLEGGKSDPLFTDILSMVCGCVDNSSSDSTILQVLKVLLTAVASTKFRVHGEPLLGIIRICYNIALNSKSPINQATSKAMLTQMISIIFRRMESDHNLGNVPQGVQASHLSTSSNVNVDSTPGETLNSRVGDIPLEEQAEKKLTLGDALSMNRAKDTSLTSLEELHNLAGGADIKGLEAVLEKAVNLEDGKKISRGIDLESMSIGQRDALLLFRTLCKMGMKEDNDEVTTKTRLLSLELLQGLLEG…
	234	UN000627	1050	GCAGTAAGCCGCCTTAGAACGGACTTGCGCGACCAGATACGCAAAGGATTAGAGAGGGATCCTCTTGCGAAGACCCTAATTCAGCTTGTTGAAGAAGGGAAGACTCGACGGTTCTGGATCGATGATGGACTCTTGGTCACGAAGAGGAACCGCTTGTATGTCCCTAGATCTGGGGACTTGAGGAAGGGACTTATCAAGGAGTGCCACGATACGTTATGGGCGGGGCACCCTGGGATACATCGCACGTTAGCCTTGTTGGAACGGGGCTATTACTGGCCAAGGATGGGGGACGATGTAGAGGAGTATGTTCGGACATGCCTCATATGCCAGCAGGATAAGGTCGAGCGGGCCAAACCGTTGGGGCTCCTTGAACCTTTACCAGTTCCCGAGAGACCATGG…	350	AVSRLRTDLRDQIRKGLERDPLAKTLIQLVEEGKTRRFWIDDGLLVTKRNRLYVPRSGDLRKGLIKECHDTLWAGHPGIHRTLALLERGYYWPRMGDDVEEYVRTCLICQQDKVERAKPLGLLEPLPVPERPWESVSMDFISNLPKVGTLGSILVVVDRF*KYATFTPAPLHCTDEESARLFIKHVVKYWGVPQTIVSDRDSRFTGRFWTELFKLLGSKLNFSTSLHPQTDGQTERINALLEEYLSL*VPTKRIGFSCWMWPSSATTCRRALQPF*VINWTTTLTPHTVMVGYTGSSPAAYHFAKEWHKNAEIARAYLEKAAKRAKKYADKDRRPENFKVGDKVLVKLQP
	235	UN000628	2619	TTTTGGGAAAAGTTTTACAGTTATTTATTGGAAAATACTAACATTAGTGAACAATCGGATAAGAGTAGATCAGTTCAGTATAAGGAGGAAGTGTTCGATATTTTGCATCAAGCTAAATCTAGCTTACCATTAAGCGATGAAAGATTACGTAATATCCAAATGGAAATTGAGGACCTGACTATGTTGTTCGATGAGGAATCTATCTTTAAGACTACTCCCAACATAATAAGAATCTTAATCAGGAATAATGAGGTAAGTGCTAAGGATTATCTCAAGGCTCGGTTACAGGATAAGGATAATATTGAATTGCTTTCAGAGTTCGGTCAATATACGATTGAGGCATTAATAGTTCATGTACTAAGTATGTTATTTAACATATATGAATATAACTCAATAATT…	873	FWEKFYSYLLENTNISEQSDKSRSVQYKEEVFDILHQAKSSLPLSDERLRNIQMEIEDLTMLFDEESIFKTTPNIIRILIRNNEVSAKDYLKARLQDKDNIELLSEFGQYTIEALIVHVLSMLFNIYEYNSIIRVASLVERLESSVRIQASLLKSRRCKTSMATDEVFRVEKSGMERKRSKLEMQYPFGSFLVQFMEERTLITLMTDLSGNNAREKKGSYYLPSHLYAVCNFDVSLLPIKLNLPMVYPPLEWTSACPPGQKPRNLSDLSGGYLSGPTGDIYDRYRLLSSGDINNFYIDIGSKGNYEKLCRVMNKLQCQPFQINSDWLKYIQENEKFLVDYGYLMPRFLSSINIKDVSILLREFHMKDEVINKLCSFSELLQTLCKNIQRSRYEKLIIKL…
	236	UN000631	1353	GGGAAGATGTCTGCGCTTTTCACTTCCATGGATGATCAAATGAAATCTCAAAATGTGAACGTGCTAAGTGCTGTGTTACCCTTGATGAAACTCCTCTCCCTCGCAGTTATAGGCCTAGTTCTTGCCCACCCCAAAATCCAAATTGTCCCCAGGGCTACCTTCAAGCTCCTTAGTAAACTCGTTTTCGCCCTCTTTCTACCGTGCCTGATCTTCACCCACCTTGGGCAATCCATAACCCTTAGTAATTTCACTCTTTGGTGGTTCATTCCTGTTAATGTACTGCTCAGTACAATCATAGGCTGCATCTTGGGGTACGTGGTTGCACTCGTGTGTCGACCACCACCCCAATTCTTCCGGTTCACTGTCATAATGACTGGGTTTGGTAACACCGGGAACCTT…	451	GKMSALFTSMDDQMKSQNVNVLSAVLPLMKLLSLAVIGLVLAHPKIQIVPRATFKLLSKLVFALFLPCLIFTHLGQSITLSNFTLWWFIPVNVLLSTIIGCILGYVVALVCRPPPQFFRFTVIMTGFGNTGNLPIAIVGSICHSPDNPFGPDCHSKGVSYVSFAQWVAVLLVYTLVYHMMEPPMAYYEIVSEGNEIQEAPVNDISRPLLVEAEWPGIEDKETEHSKTPFIARVFRSISGASQTSLPDLELTEEGGGSSPKSIRCLAEPRVVRRIRVVAEQTPIHHILQPPTIASLLAIIVGLVPAFKDFVFGDDAPLSFFTDSLAILAGAVVPSVMLILGGMLAEGPNESGLGIRTTIGIMFARLLVLPLVGIGVVALADKLSLLVQGDEMYRFVLLLQ…
	237	UN000636	312	CTTACCCGCATGGACCCTTATGTGCGTATACGTGTCGGCCATTATGTATACGAAACGCAAACAGATCCAAACGGCGGCAAGCATCCACACTGGAATCGAGTAATTCAGAGTCAATTGGCGGCGGGGGTTAATACCATTTTCATTGAAATATACGATGAGTGTAGTTTTAAAATGGACGAATTGATTGCATGGTGTGAAATTAAAATTCCACAGAGTGTAATGCGTGGCGAAACGCATGAAGAATGGTATCCACTAAGTGGCAAACAAGGTGAGGGCCTTGAAGGTGCCATTGACATAGTTTTGAGCTTTTCC	104	LTRMDPYVRIRVGHYVYETQTDPNGGKHPHWNRVIQSQLAAGVNTIFIEIYDECSFKMDELIAWCEIKIPQSVMRGETHEEWYPLSGKQGEGLEGAIDIVLSFS
	238	UN000642	6165	TGGAAGCTCTGGTCGAGCTCTGCGATCTCGTCGCCCAAAACCCATCCCTCTTCTCCGAAAAGCTCGCCTGGATCTGTAGCCGCTGCCCTCCCTCCACGCCTTCCTTNNNTCGCCTCACCCGATCCCACCTCAATGCCATCCTCGCCACCGCCAGGTTCTTGTCGAAATGCCCCTACCAAAAAGACGAAGAAGACAACACCACCAACGCCCACCCCTCGCGATCCAAATCCGCCGTCCTCGACTTCCTTCGATCGATTCCATCCTCATTCAACGCCTCCTTTTGGCCTTTCTCCTTCTCCCTCGACGCCATCTCGTCCTTCTTCTCAGATCTCCTCCCATACGTAGCGAAGGCCGCCGAACTCTCCCCTGATTTCGCCTCCGAGGCCGGCGCCGTCATTG…	2055	WKLWSSSAISSPKTHPSSPKSSPGSVAAALPPRLPXXASPDPTSMPSSPPPGSCRNAPTKKTKKTTPPTPTPRDPNPPSSTSFDRFHPHSTPPFGLSPSPSTPSRPSSQISSHT*RRPPNSPLISPPRPAPSLQTSSLPHPPAAATRMGSLGFS*RRCRGTALLCPPARRTGLSAASWSSFSRRRALRPRCPVPCLRCRSCRRCRLRRHRRRRRARRWR*SSTSICSRTGMGAL*VRRPCHRPAAHWRCRLHCRKERRKALDDGVGRGSSKGSVARPSVGNGTAGPVDGPLRQQVAAFEEESVEGLEKQEIAFRLFVHVLDKVSVKAGNLEQVRTASAKQLKSLPAFLKIRKRDWTEQGALLKARINTKLSACQAAASVQIKSLLSLDFDGKAAKIMLR…
	239	UN000645	5286	ATTTTCCAGCATAATCTCACCTCCACCGGTAGCGCGATTCAGGGGCTTCTGAGGAAGCTGGGAGCCGGATTCGACGATCTTCTGCAGTCCTCTGCNGGTCCCGGTNNCTCGCACCAGAACGGGCGGCTGAAGAAGATCTTGTCTGGGTTGCGGGCGGATGGGGAGGAAGGGCGCCAGGTCGAGGCGCTGACACAGCTCTGCGATATGCTGTCAATTGGGACTGAGGATTCTCTCAGCACCTTCTCCGTGGACTCGTTCGTGCCTGTTCTTGTTGGGTTGCTGAATCATGAAAGCAATGCCGATATTATGCTTCTTGCTGCGAGGGCTCTCACGCATCTTTGTGATGTGCTGCCTTCTTCTTGCTCTGCGGTCGTGCACTATGGGGCTGTTTCCTGCTTC…	1762	IFQHNLTSTGSAIQGLLRKLGAGFDDLLQSSAGPGXSHQNGRLKKILSGLRADGEEGRQVEALTQLCDMLSIGTEDSLSTFSVDSFVPVLVGLLNHESNADIMLLAARALTHLCDVLPSSCSAVVHYGAVSCFCARLLTIEYMDLAEQSLQALKKISQEHPTACLRAGALMAVLSYLDFFSTGVQRVALSTAANMCKKLPSDAADFVMEAVPLLTNLLHYHDSKVLDHASVCLTRIAEAFASSPEKLDELCNHGLVAQAAGLISISNSGGGQASLITSTYTGLIRLLSTCASGSLLSAKTLLLLGISGILKDILSGSGLVGSISVSPALTRPSEQIFEIVNLADELLPQLPQGTISLPSCSSFLGKGSAANKPSAGVSGKQEDANGAVHEISAREKLLQ…
	240	UN000646	462	TTTGAAGGTGTAACCGTCTCCACTACGAAATGTTTGAGCTGCGAAACGGTCACGGAGCAGAAAGAAAGTATGATCGACATTGCAGTACCGGTACCTATTTCTGGCTATGATAATGCCGATTTAACGGATAAACCCAGTGCTTTTATACAGAATTCATGTGTTACCCGCGAGTTCTTTCGCGGCGAGAACAAATACCGCTGCGAACAATGTACTGGTTACACCGAAGCCATACGCTCTATCTCGTATGAGGTGTTGCCGCGCCTGTTGGTCATCCAGTTGAGTCGCTTCTCGGGGGGTATGGAAAAGATAAACAGTTACATTCCCACTTCGTTCACTTTGCAATGTTTTTGCGCTAAATGCTGCGAGCTCAGCGATGCCAATAAGCTGCATATCTACAAA…	154	FEGVTVSTTKCLSCETVTEQKESMIDIAVPVPISGYDNADLTDKPSAFIQNSCVTREFFRGENKYRCEQCTGYTEAIRSISYEVLPRLLVIQLSRFSGGMEKINSYIPTSFTLQCFCAKCCELSDANKLHIYKLYSVITHVGATMSVGHYIAYT
	241	UN000650	621	GAGAAGATAGCAAAAATGTGTGCCAAGGGACTGGATCCCAACTTTCATTGTCCGGAAAGTGGCGAAACTCCGTTAACGGTAGCGACTGCAGCTAAAAAACCAAATAAATTACTAATAGCTTTGGTAAATGGTGGCGCTTTGCTGGACTATCGCACCAAAGACGGCACCACAGCTCTCCATAGAGCCGTTGAAAAGGACTCTCTGGAGGCAGTAACGACATTACTAGAATTGGGCGCGTCACCTAATTATAAAGACGCACGTGGCATAACGCCCCTTTATATATCAATAACACGTAAATGCGATTCGAAGGTAACAGAGAGCTTATTGCACGATCACGCCACTTTGGGTATACAAGACACTCAGGGTTGGAACGAGGTGCATCAGGCCTGTCGGCATGGT…	207	EKIAKMCAKGLDPNFHCPESGETPLTVATAAKKPNKLLIALVNGGALLDYRTKDGTTALHRAVEKDSLEAVTTLLELGASPNYKDARGITPLYISITRKCDSKVTESLLHDHATLGIQDTQGWNEVHQACRHGLVHHLEHLLFYGADMDGRNASGNTPLHVCAVNNQEACARMLLFRGTQRAALNYANQTPYQVAVIAGNMELAEII
	242	UN000653	4149	TTCATGGCGATTGGAGAGAAGGAATGTAGAGTTTCGAAATCTGGTGGTGATTTTTCTTCTTTGAGTAGGGATAGTATGTTGATTGATGATGATCAAAGAGAAAGCTCCCTGTTTGAATCCAGTGTTGATGAGGGAAGTGATGAGGAGGATGAGGAGTACAGTGACGATGATGAGGAGGAGGATGTGGCATCTGGGGCTGGTTCGGATGACTGTGATTTGTTGGATTTAGGGGAAGTTGGGGGTGAATTGTGTCAAGTAGGGAACTCGAGTTGTTCTCTTACATTCGAGCTCTATGATCTTCCTGACTTGACTGGAGTTCTTTCTTTGGAAACGTGGAATGATTGTTTGACAGAGGAGGAGCGCTTTAGCCTTGCGGAGTACCTTCCAGATGTGGACCAG…	1383	FMAIGEKECRVSKSGGDFSSLSRDSMLIDDDQRESSLFESSVDEGSDEEDEEYSDDDEEEDVASGAGSDDCDLLDLGEVGGELCQVGNSSCSLTFELYDLPDLTGVLSLETWNDCLTEEERFSLAEYLPDVDQATFMRTLKELFAGDNFHFGSPLTQLFSMLKGGLCEPGVALYCQGLKLFERHRHYRLLRKYQNSMVSDIIQIKDAWENCAAYSIEEKLRLLNILRSKKSLMYEEGDMLGSETDSSAREETINSLWTKMGMDGSRGAKSSGLAVYTRRPSLEVSSQGRAMALKPAKYRKQNPKGILDVSAPKASSKKDHTAVMGRIPSPRHGLEMKARPSVLSSSLHWRDRVVGYDSGTVRGSQVHMMAGDHGGKQAYGVDIQKRWSMGDGVTVAKVN…
	243	UN000654	171	GACTATTGTGAAGNTTTGCCAACAGGGTGGCGANNAATCATTCTTTGCGATACATGTCCACGCGCATATCATTTAGTTTGCTTGGAACCGGAATTGGACGAGGCNACCCGAGGGCAAATGGTCATGTCCGCATTGTGAGGCTGATGGTGGAGCGGCTGAAGAGGAAGACGA	57	DYCEXLPTGWRXIILCDTCPRAYHLVCLEPELDEATRGQMVMSAL*G*WWSG*RGRR
	244	UN000657	1527	CTGATGTCTATTCCGGCGACCCCACGAGCGTCGACGCCGGAGATACTGACACCGTCCGGGCAGAGGTCACCTCGTCCGGCGTCGAACCCGAAGTCGACGGCGTGGACGCCGACGTCGCTGATATCGCCAAGGTTCCTAAGCCCAATAGGGACGCCTATGAAGAGGGTGTTGGTGAATATGAAGGGGTACTTGGAGGAGGTGGGTCACCTCACCAAGCTCAATCCTCAGGACGCTTGGCTCCCAATCACTGAATCCCGCAATGGAAACGCTCACTACGCAGCATTTCACAATCTCAATGCCGGTGTTGGATTTCAGGCACTGCTCTTGCCTGTGGCTTTTGCCTTTCTTGGATGGAGTTGGGGAATAATTTGCTTGACTATAGCATACTTTTGGCAACTC…	509	LMSIPATPRASTPEILTPSGQRSPRPASNPKSTAWTPTSLISPRFLSPIGTPMKRVLVNMKGYLEEVGHLTKLNPQDAWLPITESRNGNAHYAAFHNLNAGVGFQALLLPVAFAFLGWSWGIICLTIAYFWQLYTLWILVQLHEAVPGRRYNRYVELAQAAFGERLGVWLALFPTVYLSAGTATALILIGGETMKLFFQIVCGPLCSSNPLSTVEWYLVFTSLCIVLSQLPNLNSIAGLSLIGAITAIFYSTMVWVLSVSQPRPPTISYEPLKSPSFSASVFSVLNALGIIAFAFRGHNLALEIQATMPSTFKHPAHVPMWRGAKVAYFFIAMCLFPVAIGGFWAYGNLMPPGGILNALYRFHSHDIPRGLLATTFLLVVFNCLSSFQIYSMPVFDSFE…
	245	UN000658	6264	GTCAGAGCTGAAGCTATTATTTCTATGCCTGTGATTGTCTTATGCTCTGGTCATGGTCTACTGGATCATATGTTTAAAAGACTGGAGTCCCTGGAGAAGGACAAGTGTGAGAAAGTCAATAAAATGGTTCCTCATACAATTGGCTATTTTTCTTGTCTTTATGGAGCATCAAATGCTTTTGCTGACCCAGATCAAAGCTCTTGCAAATTATACTTTACCAACAGCGTTGAGAAGCATACACAGAAATTGAATCTTGTTTCAAGAGGATTCTGTTGTCCACTGTGTGCGAAAAGAGAAATGCATCACTATGATCAAGGTTCTGTTGTGCTACATATGCCTCATGTTCAAAGGATGGAAGTTGATTTGGGTTTTGATTTTGTTAATCTACAGGCTTTCTTC…	2088	VRAEAIISMPVIVLCSGHGLLDHMFKRLESLEKDKCEKVNKMVPHTIGYFSCLYGASNAFADPDQSSCKLYFTNSVEKHTQKLNLVSRGFCCPLCAKREMHHYDQGSVVLHMPHVQRMEVDLGFDFVNLQAFFFRLLFDESSEEVQVACVGVIPRILKHGTKEILLNTRLQWINCIDYLLIHKKKAVREAFCLQISCFLEDHILDSLFVDGDSCNKTKEEKFLDKLKHALAATEDLQIFQTLLESTAEILNAVDIHGQLFFFSLILLIDQLDNDHLTIRISASRLIHRSCYFHLKGGFELMLSEFIHIRDELFDYLCARLVSRPMMVREFAEAVVGIETAELIRKMVPVVLPKLIVTHQDNDQSDVTLNELAKHLSMDVVPLIVNWLPKVLAFFLLRSD…
	246	UN000659	1032	ATGGATTTTGATGATGCGAAAGAGAACATACAACCGCTAGCTGCTGGACGGAATGCCAGCATATTGCATGCTTCTTTGCGTGTGGAATCACCTCAGGAGCTACTAGCTCAGCGTCGTGAATTAGAACGAGTTATACACGAATATAAAGGAGATGATCCACTCGAACCATGGTATGCTTACATTAGCTGGATTGAGCAAAGTTTCCCATCGGGGGGCAAAGAATCTGGATTAGAAGAGGTTCTTACAAAGTGTTTGTCACGTTTCGAGAATGAGGAACGTTATTTTCAGGATAGGCGTATGATTAAATTGTACATGAAATTTATTGATAGTCATCAACACCCCATGGAGTGCTATCAACAGTTGTTTGATGCGGGTATTGGAACAATGGTGGCGGATTTC…	344	MDFDDAKENIQPLAAGRNASILHASLRVESPQELLAQRRELERVIHEYKGDDPLEPWYAYISWIEQSFPSGGKESGLEEVLTKCLSRFENEERYFQDRRMIKLYMKFIDSHQHPMECYQQLFDAGIGTMVADFYICWAYHYDTCGNTRKADEIFRRGIACRAQPLEELQEAHQHFGFSVSQRLLYQDDEDVKENTKRQFEERRLALTSLRGHRRKAIVGSIRTGAAVKSYTPGTVQTTVGASSSRQSNTRVQVLHDENASSNLPLPLAIATAETEREDPKSVVRSIIDAARNQENHKEPGPWNKAHDKKKSGKLFARSTSNTDLGFNIHEDVEMEDVEYEIFNK
	247	UN000665	3900	AGCAATGGGCACAACGGGAATATGCCTGCTGATAGAATGCCTCCATGCACATCTGATGGTATTTTTGATGACTCCTCAAATCATGCTCCAGGGAGTAGGTTGGGAACTTCTGATGCACCTGTGTGTGATGGAAGCCTCTCGAGTTATAATGGTCAGTTGAATGCTGTGGGACATACTAGCTCGTATGTACAACCACTAGTAGACATTGAAGAGATGTATGACAAGGAGTTAGAAGAAGCACAGGACCTCAGGCGCCGCTGTGAGCTTGAAGAAAGAAATGCACTAAAAGCTTATCGAAGTGCACAGAGAGCTTTGCTTGATGCTAATGAGAAATGCAATATCCTCTATCAGAAAAGAACATTGTTCTTAGCGCAACTTAGAGCTTGTATGATGGTGGAC…	1300	SNGHNGNMPADRMPPCTSDGIFDDSSNHAPGSRLGTSDAPVCDGSLSSYNGQLNAVGHTSSYVQPLVDIEEMYDKELEEAQDLRRRCELEERNALKAYRSAQRALLDANEKCNILYQKRTLFLAQLRACMMVDSSSLWHQRCNNHEETESGSLKNVAKSNLDMLPSSSCPIQAYVSNVQCTDGAPIATAYQNINGHDSGADPCSEPDASTSELGHHKDNSAADGVLSPSNDPNMSADDEEEVFPPIQSRLICDNKQEKLEERTMDMSQGTARRCFIENAQDSALLEASLRSKLCARLGIGTSSRSSGSCLNAEPSVDKGADNDLENKKTRTITTKLSFLSDLPFLNAEQAQMDDTEGLGRHGSKTFQVSSRIHDQNYCDKFSSDYGSHRSTERSEPEES…
	248	UN000666	3681	TTTCACCATAGGAAGACCTTTCCGACGAAAGCCGTGAAACCGATCTTGCCGTGGAAAGTTCCTGATGAGATGACTGTTCCGAGAAAAGCTCGGTCAGTGTCTGCGAAAAGGTCACATGAATGTTGGATTTCAGGTGGCGGAAGCAACGGCAGAGAGCCGATTCCTCGCCAAGCTTCGACGTCGCCGGCAAGGCCAAGCGCGGTCGGTCCGGTGCCGGATGCTCCAGTCGCGCCGCCCTCTTATAATGCTTCAGCACGAAAGAAGATGAAGCTGATCAGAACCAAGAACAGGCCTCCGAAGGTCTCGAATGGTGCATCCATTCAGGAGAGCGAGATCGAGATCGAGATAGCCGAGGTCTTGTTTGGAATGACAAGGCAAGTCCAGAGCCCTTCAAAGCAG…	1227	FHHRKTFPTKAVKPILPWKVPDEMTVPRKARSVSAKRSHECWISGGGSNGREPIPRQASTSPARPSAVGPVPDAPVAPPSYNASARKKMKLIRTKNRPPKVSNGASIQESEIEIEIAEVLFGMTRQVQSPSKQESASSQKFKSRDSIGSSIDAKSGESSSIAISQTAIDPSSVLQQNSNPSAIAPMRKRPRPHKSEEEIPATASFTALDASYAAKIEADQSAKVGISSPKSDTHMFAAVENGCGSVSVDLGSSLPPEMPQDSVKTESTLVAESDDPDGQFGIGTRDKTVLPAEETPCAKVEDPDLEDTKTTKIEAPSIASADYPQEEKFKIDLMALPSEKSSPLRDEIPDLEKPLALDAEPVPKEEIMKADEEKEEQIVEEGEVGLTEKTGTIAKELKS…
	249	UN000667	1611	TCCCCAGCCTGTGCCTCAACGTCCCCCACAAATAACGTGGCTGTAACTCCGCCAAAGAAATCGCCAAACGACTACATCTTTGGCAAGTACATTGGCGAGGGCAGCTTCAGCAATGTGTACCTCGCAGTGGATGTGCACACAAAGCGTGAATATGCAATTAAGGTGTGCGAGAAACGCCACATTCTGCGTGAGGACAAGCAGGAGTATGTGCGGCGTGAGCGCGAAGCCATGCACATGATGACCAATGTGCCCGGCTTTGTGAATCTGTCGTGTACGTTCCAGGACAGACGTTCTCTGTACTTTGTGATGACCTATGCCAAGAATGGCGATTTGCTGCCGTACATCAATAAGGTGGGATCCTTCGATGTGGACTGCACACGCCACTATGTGGCCGAATTA…	537	SPACASTSPTNNVAVTPPKKSPNDYIFGKYIGEGSFSNVYLAVDVHTKREYAIKVCEKRHILREDKQEYVRREREAMHMMTNVPGFVNLSCTFQDRRSLYFVMTYAKNGDLLPYINKVGSFDVDCTRHYVAELVLACEQMHRRNVVHRDLKPENILLDEDMHTLIADFGSAKIFKPDERSSVASTCVNVPSTLTRSSRFPNRSDEDEDDDAEDTNDTGSDEDRTHSGRPGRYYNRRRKGSFVGTAQYVSPEVLQNGPISPAADLWALGCIVYQMISGLPPFRGSNDYVIFKEILACDLDFPQGFDKDAEDLVRKLLKVKPEERLGAQDGGGSYVSIRSHPFFNGIDFGTVRQQTPPPIYPYLPGVSKDEDFRSQYCMPENLEPGLDDKQLTRLLGIELG…
	250	UN000670	4740	GAGAAAAAGCGGCCGGGGGAAGGGGATAAATCAACCAAGAGGAAGATGAAGACCGCTTCGCAGATTCAACTGCTCGAGAAAACCTACGCAGTGGCCACGTATCCGTCGGAGGCGATGAGGGCGGAGCTATCGGCGAAGTTAGGGCTGACGGATCGGCAGTTGCAGATGTGGTTTTGTCACCGGCGGCTGAAGGATCGGAAAGATGCGGGGTCGAAGCGGCCGAGGAAGGAGGCTGCGGCGGCGGCGGCTGGAGATGAGGCGGTGGGGGTGCCGGAGCCGGCGAATGAGCTTGGTTTGGGGACTGCTCATGGTTCTGGTTCTGGTTCTTTTGGGCAAGGGGAAGGGAGGAGGGCCTTGCCGCGTGCAGTGGGGGCTGCGGTGCCGAGGGTGGGTGGTGAT…	1580	EKKRPGEGDKSTKRKMKTASQIQLLEKTYAVATYPSEAMRAELSAKLGLTDRQLQMWFCHRRLKDRKDAGSKRPRKEAAAAAAGDEAVGVPEPANELGLGTAHGSGSGSFGQGEGRRALPRAVGAAVPRVGGDFPMVKRYYEPPQAISELRAIAFVESQLGEPLREDGPVLGVEFDPLPPDAFGAPLAMTSQQNQAMRPYDSKMFERQDPKSIKTSSFLPSMDHCFVPSSSGGKRKAAFGSVPGVHPQTGARAALHEYQFLPEQPSVRADMYERVAPSHLYDTPVDAPIGRVPALSAGGPYHHGNEQAAAGYNFQGQVPNVSILPQQGRQSHVFSSGSTEYETVPNKNPLMNIGTDAQFGTHPIIGLENPFVSSNRRVSLDDDPSRMERKRKTDEARIA…
	251	UN000674	5370	ATGGGAATACCGGATCGGTCTCTGTCAGATTTAATAAGGAAGGTTAGGACTTGGATGGAGGAATTGCGGAGAAGCTCGAGGCAATTTTGNGATGCCGGACGAAAGCTCCAGGCTGTGCGATGAGTGTGACTCTGGCTTTTCTTTTTTAAATCGCCGGCACCATTGCCGGAGTTGTGGTCGATTATTCTGTGGCAAATGTATGCAGAATGACAGTGTTCTTGGTGATGATGGGGAGAGAGTGAAATTCTGTAAGTTCTGCTTTTGGGCAATTGGGCAGGAGGCGATGGCAGATGAGAATGATCGCAGATTGGATCATCCTTTGCTGATGCAGGCATTGGTTATAGTGGACGAGCTNNNTGGTAGTTGTAGGACTTTTTGGAGCGAGAATCTGGTTGGGTT…	1790	MGIPDRSLSDLIRKVRTWMEELRRSSRQFXDAGRKLQAVR*V*LWLFFFKSPAPLPELWSIILWQMYAE*QCSW**WGESEIL*VLLLGNWAGGDGR*E*SQIGSSFADAGIGYSGRAXW*L*DFLERESGWVSGSAAGIFFASCCGEQQHSLLFGSAVSYLSTPLCDQE**RRCGGCWEAFFESL**SLPRYF*CTW**Y*Y*NRVLQSQFIGFEFFWGPFFDNKQP**SC*VFRISASG*SSVSK*CSFASRIFGHSKKS*NGFRGSRKY**LHR*HVYIPESVPKGTRAIGF*KQRPHLVSSTA****G*RRR*FL*V***G*QCW*DGNDILF**L*Y*IIS*QXRDQM*GRENP*GLWFMGIFGLLYHSY*GERAFMLEMRMREEAGWR*WPHW…
	252	UN000676	1407	GACTCCGCACATAATATGTGGAATGGCAGAACTTTTCTTGAACGCAACTCATTCAGGAAAAACTTGAGCAAGTTTGTAATGTACACGAATTTTAGTTTGCGGCATTTGAAGACATCTCGGACACAAGTTACTGCTAAGTGCGAAGTTCAAAGTTGCCTATGGAGTATTCATGCTTCAATAGTGGAATCAGGGCCTCAATTTCGAGTTCGGACCTATAATCCTAATCATACTTGTTCAAGACCAATGATGGGAATGGCTCATCCTCAAGCAACGACTAATTTAATAGCCGATTTTATCAAGGAAAAAGTACGCCTTCATCCTGAGTATAAATCGAAGCAAATTATAAATGATGTTAGATTGGAGTTCGGTGTTGTTGTTGGCTATAGAAAGGCTCATAGG…	469	DSAHNMWNGRTFLERNSFRKNLSKFVMYTNFSLRHLKTSRTQVTAKCEVQSCLWSIHASIVESGPQFRVRTYNPNHTCSRPMMGMAHPQATTNLIADFIKEKVRLHPEYKSKQIINDVRLEFGVVVGYRKAHRVKEIALDEIRGSYEQSFRILPNYCAELMRTNPGSHYHLDID*DCSFSKFFFAFGSSLQSFKTYMRPLIAIDGEHLRGKYPGVLFVAMT*DSNHGLFPIAFAIAEIERYDTWVWFLSCLKIALGPLPGLTVISN*QKGFVEAVKNVCPNANHCYCCLHIAENVHERFKDKAIVSKFWCAAKSSGSCDYERHMNDLRNVNEEEYVYIENIGKERWANAFVHAGQYDMLTTNSAECTNSLLKDIQELPITRQVEKIRAKIMDFLQRHRD…
	253	UN000680	6414	ACGCGCATCGATCAGTTTTTCGCTTCAAAGAAAAAGAGGCCTATATCACCCTCTCTGAAGGCTGAGATCCCTGATAAAGATGCAAAAGGTGCACTGGATGGATCTCCTAGTGCCAAAGGCACTCTGGACAGCTACCTAGTAAATTCTGACCATGATAATTGTCTGGTTAAACCAGCATATGAAGATTGTGGCGGAGCATCAAAGCATGATCCTGTTAAAAGGAATTTAACATTGGAGATCAACTTAGCTTCAGAAGTTATAAACAGATCCACATCACCTTTGAACAATTGTGAAGGTCTAGAGCATTCTGAACAGGCTGGAGTTGTAAGGAATGTGCAGCAATTAGCACCATGTAAAATTTCAGATGAGTTAAGTAGTTCTCATGATGCCTGTGACATT…	2138	TRIDQFFASKKKRPISPSLKAEIPDKDAKGALDGSPSAKGTLDSYLVNSDHDNCLVKPAYEDCGGASKHDPVKRNLTLEINLASEVINRSTSPLNNCEGLEHSEQAGVVRNVQQLAPCKISDELSSSHDACDISTEVHGKETVSSASGAQNLELRQFAADFLSLYCSELSSSVNSPSELKLHGNKRNGSPSLLFDNCKMCKKKQCISQCNQSQLEENICLEMECSEKVKSGLQSRPAEASSGHSGTLEVMDGKAEKEPDQVILSYSSFRKCNKVPNSSLIMAENCTTPGLSTNTLCTRETPKSLRRSSIVSPGDAFWNEAIQVVDGLFAPEDKVSVCIAKGVGHIKDQSGRTADNGSKSIEDMVFRHLELNATVGSIENSTKDSARLPAVDLQKDVSPL…
	254	UN000682	1458	ATGGTTTATCCTCAGATATCTGGATTGACTGGGACTGGGATCAGGACATGCAAGTCCTTCCAGAAAAGGTTGTTTGTTCATGTGGAAAGCCCTGATGTTCTTTCAGAACATGAAGAGTTTGATTTTTCGGATGTATTTGGTCCCTCACCAGTTCAAGCTGCAGCAGAAGTAAGTCCGAATTCAGGCAGTTCTGATCAAGTATTGGATTCGAAAGATGTAGTCTATGATGATCCAGTTGTCATAGTTAACCGATCACATTCACTGGTGGGGCCCACAACTTGTGTTAGCCAATCGTTGAAGTTGAGCAAGCTCACTTTACATGAGACAGAGAGTTCTTTGGAACTTGTAGTAGAGTCTGTTAATGGAGAGAGACTAGCGGAAGTTCAGGAAGCAGCTGTC…	486	MVYPQISGLTGTGIRTCKSFQKRLFVHVESPDVLSEHEEFDFSDVFGPSPVQAAAEVSPNSGSSDQVLDSKDVVYDDPVVIVNRSHSLVGPTTCVSQSLKLSKLTLHETESSLELVVESVNGERLAEVQEAAVNDAAENPLDSGSHQSVKSQGVGLEDFEIMKVVGQGAFGKVFQVRKKGTSEIYAMKVMRKDKVMEKNHAEYMKAERDILTKVDHPFVVQLRYSFQTKYRLYLVLDFVNGGHLFFQLYRHGLFREDLARIYTAEIVSAVSHLHANGIMHRDLKPENILLDADGHAMLTDFGLAKQFEENTRSNSMCGTVEYMSPEIVLGKGHDKAADWWSVGILLFEMLTGKPPFMSGNREKIQKKIVRDKIKLPAFLSSEAHSLLKGLLQKEASRRL…
	255	UN000683	4350	GGCACCCAAGAGAAGCCCTGCCCGGTTTCTAGGGTTTCCACTCGAACCCTCACTCCCCAAACCCAAACCCTAGATTTGTACGCCCAGGCCCGAAAAGCCCTCTGCGAACGCTCCCCTTTCGACTCCGAAGAGGCCGCTGCTAGGGTTTCCACTCTCCCTTTCGGCCTCGCGGCCTTCCTGTCGAAATCGTCCGACCGGAGAAGGAAGCACAAGAAATCGGTGCATTCGGAGTCGGCGGCGAAGGCGCCCAGGGCTGTGCGGAGCGTGTGGGCCGATACGGAGGAGTATTTTCGGTATATTGTGCTGGCGGATGTGGAGAGCTTGGGAGCGAAGTCGGATTTAGGTTCAGGTTCAGGTTCGGGTTCGGGTTCTTGTTTTTCGGTTCCTAAATTGCCTGTT…	1450	GTQEKPCPVSRVSTRTLTPQTQTLDLYAQARKALCERSPFDSEEAAARVSTLPFGLAAFLSKSSDRRRKHKKSVHSESAAKAPRAVRSVWADTEEYFRYIVLADVESLGAKSDLGSGSGSGSGSCFSVPKLPVGAVGVDGDVGLAEVRVSNNVDVVEDVGLEPVSVAEELENEGQQIEIEAVGVENSNSGAAAEASPRKELENSDSGSIDLHWLFGSKHKLLLTSERPSKKRKLLGGEAGLDRLAAVGPSEGRNSVVCHACCSSDCSEQANRFLFCDSCSVCVHQRCYGVQDVPMEKWLCSHCRQRGCLKDDSKGKLAETEVVERPCLLCPKEGGALKPVDRDAGKSGNSGAMKFAHLFCSLWMPEVYVENMEMMEPIMNIGGIKDTRRRLVCFLCKVK…
	256	UN000685	5085	ATGGAAGATAAAGTTGAGATTCCTGAAAGACCCGAAATCTCTGAGAAATCGAGATCTTTGGATGCCCAGAGCTTCTCTGGTGAGAAATCTCCAAATGGTCAGGAAGGTAGGGTCTTGAAGAGGAAGCATTCTTCTTCGAAGAAGAATGAAGAAGAGATCAGTTTGGGGCAAGTGAAGAAGAGAAGGAAGGGGAGAAAAGAAGTTTCTCTCAGTAGTTTGGAGAATGCTTCTGGTAAGAGTAAGAAAGGTTTGGACTCAACCAAGTCAGGGTTGAAACTGAACGGTTTTGCTTGGTCTGGGAAGAACTCTTCAAAGAGGAATAGGAAGAAAGGAAATGGGGCTGTTTCAAGTTACGAGAATTTGCAGAATTTGGGCAGTTTTATGCCCCTTTCACATTCT…	1695	MEDKVEIPERPEISEKSRSLDAQSFSGEKSPNGQEGRVLKRKHSSSKKNEEEISLGQVKKRRKGRKEVSLSSLENASGKSKKGLDSTKSGLKLNGFAWSGKNSSKRNRKKGNGAVSSYENLQNLGSFMPLSHSLDDNVIVVPKRPRGFSGRNKFQSNHVGKQKVNSKSKGVISQLTTSTSKSCAGFSRSKLNGDPKEPVKSRVGKRKKVLDELKDNSSSGPTSFSQIKGDDGGSVQVTGSRAAKRARRNHGKGGKPDGDKQAREEVKWSPVKNCVSAFEELLEDDEENLEQNAARMLSSRFDPNCTGFSGRGSASRSQSADGSYFSPMFEGSFKSLGVVASEGLEAVSDSAGRVLRPRKQHKHKGIFRRQRRHFYEVCSLDLDPYWVVNQRIKVFWPLD…
	257	UN000688	5937	ATGTGGACTAACGTATTCAGAATTGGAGGTCTACGACAAGTTTCCTGGTTCCAATTTCTTCCTTGTGAATTTGATCCCAACTCTCTACCAGAGAAAAGTTTGAAAGCAGATCAGAAAGATGCAGCAACATTTTTGGTGCTTTCATCTCATCTGCAGTTGCAGAATAAGGGGCTTCTCAGCACATGGACCAACTCTTTTGTTGGTCCTTGGGATCCTTCCCAGGGTATTCACAATCCAGATGAGAAAATCAAACTCTGGCTCTTCCTACCTGGGTGCCACTCGTCTGTTGTTGAAACCGCTCAGGCCGCATTGTCTAAATTGAGAGTTGTTGGAGCTGGACAGTGGGTAGCTCCTGGTGATTCAGAAGAGGTTGCAGTGGCTTTATCTCAAGCTCTACGG…	1979	MWTNVFRIGGLRQVSWFQFLPCEFDPNSLPEKSLKADQKDAATFLVLSSHLQLQNKGLLSTWTNSFVGPWDPSQGIHNPDEKIKLWLFLPGCHSSVVETAQAALSKLRVVGAGQWVAPGDSEEVAVALSQALRNRIERELLKSSFMRFGDVFTRCHSFAQSEKQFRRVQPACEFIFTATEEAIFVHAIISAKHIRSLSGDDVERVMRQHSSKKLRESISVIVSPHGMRGRLTGYCPSDLVKQVYFSKHHKASNGSTAQSLNYQLHGQKCYVEVTIGCPRVENDKAVQSNSTLNRNVSKHHNTEQKPGLADNSPVLERTYIFPAEAVLVPVIQRAFARSSLKRIWLQNWVGTSVCEAWPLMNFPDSSFLMRCSRLGNSGNIESLLNPWFESNGIHKRHSY…
	258	UN000689	5694	TTCAAGAAGTCTGGTACTGGGCAGGGCGGGCAGTCTCGGATGGGCCCCACCACAACATTGAGTTCTGAAGCCAATGTTGTTGTTGCCACTACCCGAGCCACGCCGAATGGTGTTCATGTTGAATCACAATTGCATGATGTACCAGTGTTGGGTGCTGGCAAGCAGATTGATTCGTCTGTCCCGAAAAGCTCCCGAGCCCTTCCAAAGGCTCCATCTTCTCAATCGGCTTCTGCTGCGGCAGATACTTCTACTCCTGGAACACCATCTAAAGGAGATGTATCAAGGTCATTCCCTCTTCAGTTTGGATCCATAAGCCCTGGTTTCATGAATGGAATGCAGATACCTGCTCGGACTACCTCAGCTCCTCCAAATTTGGATGAACAGAAACGTGACCAGAAT…	1898	FKKSGTGQGGQSRMGPTTTLSSEANVVVATTRATPNGVHVESQLHDVPVLGAGKQIDSSVPKSSRALPKAPSSQSASAAADTSTPGTPSKGDVSRSFPLQFGSISPGFMNGMQIPARTTSAPPNLDEQKRDQNILQARHDSYKSIPTMSIPSAPKPQKKNVVSANQPNIVESHPSSQAKRDSQVQVPVAPIATTDQKSTATPITGISIPISYQQPQIPLQFGGPGAQLQSQGIRASSLQMPMLLPVGNATQVQQQIFVPGLQSHPLQPQGMMHQGQSLGFAPQMGHQLAPQLGNLGIGVTSQFTPQQQVGIFGGPRRTVKITHPDTHEELKLDKRTDMLSDVGSSGPRVHPHVPPQSQPIQTFSPAHPINYCSTIQPNSYNSSMFFQNPTSLPLTSAQM…
	259	UN000690	5850	TCCGCATATAGCGGATCTGAATGTACTGTTGCCTCCTCGCTTGACCAACCCAGTCGAGTATCGCCTTAAAGGATCAGATGGATGCTTTTCATGGTCATGGGAGCATCATGATATTCTCTCTGTTCTACCAGAGTATAATGGCACTAGTCGGTGTTCAACAAGTGCTAGATTAATATCAATTGCTCCTTACAGTGGCCGAAAGGAGACTGCTGTTTATGCTGCTGACCTCCTCAGTGGGACTGTAATTCGTTGTGAAGTTTTTATTGATACGATCTTCAGGATACAGATATTCCATCATTCAGTCAAGCTTGATCTCCATGGGCTTTCTACACTTCATGTCCGTGCCTTTGATGAAGAAGAGAATGTTTTTTCTTCTTTGGTGGGCTTACAGTTCATTTG…	1950	SAYSGSECTVASSLDQPSRVSP*RIRWMLFMVMGAS*YSLCSTRV*WH*SVFNKC*ININCSLQWPKGDCCLCC*PPQWDCNSL*SFY*YDLQDTDIPSFSQA*SPWAFYTSCPCL**RRECFFFFGGLTVHLAAYT*IS*G*WCASSSCSYSFEGYSTE*LWRFMW*PNYPNKTGK*WCRLRPICSKRN*NWPRDCLCAFA*ATT*TFCR*DCFDCCRSHFSRSSVTSFCHHWRFHPLYSKSYSSEYPSSNSFAVSLSSVVCVKHFSCSG*LYLRIGSCFELGNY*CYC*RYQSCWTHTDIIHACGPSKEVIFIHNTCDHFI*AS*RSESFYIHSCLACC*RPTICHIPESFL*WT*YARDILY*E**CEVAMQRFALLGYIHHPK*HCC*GGLENLP…
	260	UN000691	5493	GATTCTGAGAGAAGGAATGGTTGGCCATCTTCACAGATAAATCTCTGCACAAACCAAGCACAAGTAAACTTGAGACCCGAGTTTGTGGAAAACCAACCTAGAAACCAACAACAATTCAGATTAAATGGATTTTTGCAGGGTCCTCTGGGTTTTCAAACGAGGCCCAACCAGTCAGAGTTTATCAGGGAAGCCACAGACCCTGAAAGAAACAATTTGACACCTAGAAATGTAGTTATTCTTGAATCACAGCAAGGGAATGCTCTTTAGAAGAATTCAGGCAGTACAAGAATTTCAGGGAGACTTGAAACTGTTGAGGTACCGGTTAATTTTGACTTTTTTGGTGGTCTGCAGCAGGCCATGAGGAACCAACAACCAGGTCGGCCCCAGCCTTGGTTGAAC…	1831	DSERRNGWPSSQINLCTNQAQVNLRPEFVENQPRNQQQFRLNGFLQGPLGFQTRPNQSEFIREATDPERNNLTPRNVVILESQQGNAL*KNSGSTRISGRLETVEVPVNFDFFGGLQQAMRNQQPGRPQPWLNQQPGVADMQLRQQQLLYRQMQELQRQQHLQQLDQEARQQNSLSSLSAIAKQASSDQLPSLVNGVPIHDASNYMWPGQPMGGDSRIPSSSQMLIGGNANWMHRNGSPAMQGYQNGIMFPQEQNQVFRSMGFVPQQLDQSLYGAPVATSRDSLNQFPHFQGISNDGVDTITKASGNQLEKPAAQSATFNAFQSDQSAEFPNQAGISDGVSVSRQGFQGKDLFGHAPIQSLHNGLLSENFQQVNPLSRNVNVQEFHDRQERVGWDGNLQ…
	261	UN000693	1023	ATGCCCATTTCGAGATACCAGTTAAGGAGTGAGTACAGCTTAGCAGATCCAGAGCTCTATCGAGCTGCGGATCGAGATGATCCAGAAGCGCTCCTTGAAGGGGTCGCCATGGCAGGCCTGGTCGGTGTCCTGCGCCAGCTGGGTGACCTTGCCGAGTTTGCTGCTGAGATCTTCCATGAATTGCATGAAGAAGTGATGGCTACTGCTTCTAGAGGTCATGGTCTGGTGATTCGAGTTCAACAACTAGAAGCAGAGATCCCATCAATTGAAAAGGCTCTTCTTTCTCAGACTAGTCATTCACATTTGACTGACGGTTCAGGTATTGAATGGCATGCAAATCTAAGAATGGACCAGAATTTGATCACTCGAGGAGATTTACCTCGCTTTGTTATGGATTCC…	341	MPISRYQLRSEYSLADPELYRAADRDDPEALLEGVAMAGLVGVLRQLGDLAEFAAEIFHELHEEVMATASRGHGLVIRVQQLEAEIPSIEKALLSQTSHSHLTDGSGIEWHANLRMDQNLITRGDLPRFVMDSYEECRGPPRLFLLDKFDVAGAGACLKRYSDPSFYKTELASTEMKKAKREKKSRKIKKREARLKKGDALEIFSTSQFSSRLHQLASDEXKHACNVPTSGIRLKRGHLNSASFNSRTGRSYMEDILELRPFEKRTAFDNSIPPTHLKAESSDVSVSGREIYEISVEDPINKFMRRKRTAVLSPKRRVPKLTADELGEDISKGGNLESFPE
	262	UN000695	1281	GAAGAATATGAAGGAAACATCGTCGGGACCAGCGATTTCATCTTCCGAAAGATCGGAAGCTCCGTCCCTCTCAAGCCATCCGATTCCAGCTTCGACTTCGAAACCGCTCCTTCGGAGGCTCTCGCGGTCTCCGAGCGCTTTGGCGTCGTATTTCTCGCGCATTCCGAAGGGTTTTATGTGGCAAAGACGAAGGATGTTATCGAATTGGCGAAGAAGATTAAGGAAAAGGGAAAGGGCTCGGGTAGTATTCAGGAATTGAGTATTGTCGATGTTACTATTGGTAGGGTTTCTATATTGGCCTTGTCTACGGACTCTTCGACACTAGCTGCTTGTGTTGGTGGGGAGATTCACTTATTTTCTGTGGTTTCACTTATACAAAAGGGGAAAGAGCCATCTTTT…	427	EEYEGNIVGTSDFIFRKIGSSVPLKPSDSSFDFETAPSEALAVSERFGVVFLAHSEGFYVAKTKDVIELAKKIKEKGKGSGSIQELSIVDVTIGRVSILALSTDSSTLAACVGGEIHLFSVVSLIQKGKEPSFSHSLSESSHVKDLRWRKNEENSYVVLSTDGKLYYGDLESPLKDVMDSVDAVDWSVKGDYIAVARENTLRILSSDLKERLHMLLLFRLWANDTDHITKVDSIKWVRVDSIIIGCLQLTDDGDEEGYLVQVITNNEEGPIKASSMPCVISFCELFAGLDDQIVPCGSGPLLFASYLERWQLVLASNRKNTDQHIFSLGWSLDDNNREAAVIEFLDDKEVPRIELPENGDDNLIVGFGVDKVSLYEKIEYIKSDQEHKELYPYCVLLCL…
	263	UN000696	603	ATGACAATCCATTCTATTGTTATTCAAAAATTACTGAGTACGAACGCACATCTAGGCCGTCGGGTAGCTGCTCACCATTTCAAAGTCTATATCTGTGGTTCCAGAAATGGAATTGCTATTCTCGATTCAGACAAAACACTGATTTGTTTACGAAACGCTTGTCATTTTATAGGATCTCTCATTCGTCAAAAAGGCCGTTTCTTCTTTGTAAATACCAATTCGTTATTCGATGAGATAATGGAACAAATGGCGATGAGAATCGGCTGTATTAATGATTCTCAATGGAGGATCGGGGGTTTTTTGACCAATTGTTCAAGTCCGAAAAAAATCCGTTCGAGAAACAAGAAGATTAATTTCGGGTCGAACCAACAACCAGATTGTTTAGTTATTATGGATGCA…	201	MTIHSIVIQKLLSTNAHLGRRVAAHHFKVYICGSRNGIAILDSDKTLICLRNACHFIGSLIRQKGRFFFVNTNSLFDEIMEQMAMRIGCINDSQWRIGGFLTNCSSPKKIRSRNKKINFGSNQQPDCLVIMDADRKSSVILEADRLQIPIVSLVDSNIPLGSYKRITYPIPANDSIQFVYLFCNLITKTVLLERGRIVAMK
	264	UN000698	813	AAAAGGATCATGTTCATAGGTGATTCACTTCAGAGAACTCAGTGGGAGTCGATGGTGTGTCTTATTCAATCCGTCATTCCCGAAGGAAAGAAGTCAGTACACAGAAACCCGCCCATGAAGATTTTCAGAGCTGAGGAATATGAAGCTTCCATCGAGTTTTATTGGGCCCCATTTATCGTCGAGTCCAATTCGGATCATGCTACGAGGCATACAGTGCTTAAAAGGCTGGTTAAGCTCGACTCCATTGCCAGGCATGGCCAACAGTGGAAAGGAGCTCATGTGCTGGTCTTTGACAGCTACGTTTGGTGGATGTACAAGCCTATCATCAATGCCACAATGGGGCCAGTTCAAAATGTTCACGAATATAACGTTACCACTGCTTACAGATTAGCTCTGCAG…	271	KRIMFIGDSLQRTQWESMVCLIQSVIPEGKKSVHRNPPMKIFRAEEYEASIEFYWAPFIVESNSDHATRHTVLKRLVKLDSIARHGQQWKGAHVLVFDSYVWWMYKPIINATMGPVQNVHEYNVTTAYRLALQTWSNWLESNIDPLTQKVFFMSMSPTHLWSWEWSSRNDGNCFNESYPIEHPYWGTGSNLEIMKILRDTLQETEIDVTLLNITQLSEFRKDAHTSVYTERRGKLLTKEQKSDPNTYADCIHWCLPGVPDTWNEILYAYLL
	265	UN000701	5721	GCAGCCTCCTACGACAACTGGGAGCGCCTGGTCCGCGCGACCCTACAGAAGGAGAAGCTCCGGCACGCCGGAAAGGGCCTCGATCGGACTTCCGGNCGGCCTCGCCGGTGCCGTCCCTCCATCCCTCGAGAAGACCACCAACATCGACGCGATCCTCCAGGCAGCAGATGAGATCCAAGACGATGATCCCAACGTTGCGAGAATCCTGTGCGAGCAGGCGTATACGATGGCGCAGAATCTGGACCCGAACAGCATTGGGAGAGGTGTACTCCAGTTCAAGACTGGTCTAATGTCTGTAATTAAGCAAAAGCTTGCCAAGAAGGAGGGATCTAGAATTGATCGAAATCGCGATATTGAACGGCTATGGGAGTTTTACCAATACTATAAACGGCGGCACAG…	1907	AASYDNWERLVRATLQKEKLRHAGKGLDRTSGRPRRCRPSIPREDHQHRRDPPGSR*DPRR*SQRCENPVRAGVYDGAESGPEQHWERCTPVQDWSNVCN*AKACQEGGI*N*SKSRY*TAMGVLPIL*TAAQSR*YPERRRKMEGVWNIQHKAGRAGTEFFRNEKGLCHAEGLSRGYGGSFQRWGHGWGRQTDC*GVKKDTEI*CSLGGRTYFIQYCTPRCTGFNQCYWILSRS*SCNICYTLHC*LPSTSCSS*GFPSAQFGHV*SPTICIRFSERQYP*PA*TCGSFNSKCAVSSRHTR*G*T*N**ESYN*GFPKGVG*LHQMVQILAHSPCME*HRSDQQGQEAYFGFVILSHLG*SSQCSFSS*VHLLYISQHGDGVGFDIRQD*SCASSKL*…
	266	UN000704	5670	TTCAAGAAGTCTGGTACTGGGCAGGGCGGGCAGTCTCGGATGGGCCCCACCACAACATTGAGTTCTGAAGCCAATGTTGTTGTTGCCACTACCCGAGCCACGCCGAATGGTGTTCATGTTGAATCACAATTGCATGATGTACCAGTGTTGGGTGCTGGCAAGCAGATTGATTCGTCTGTCCCGAAAAGCTCCCGAGCCCTTCCAAAGGCTCCATCTTCTCAATCGGCTTCTGCTGCGGCAGATACTTCTACTCCTGGAACACCATCTAAAGGAGATGTATCAAGGTCATTCCCTCTTCAGTTTGGATCCATAAGCCCTGGTTTCATGAATGGAATGCAGATACCTGCTCGGACTACCTCAGCTCCTCCAAATTTGGATGAACAGAAACGTGACCAGAAT…	1890	FKKSGTGQGGQSRMGPTTTLSSEANVVVATTRATPNGVHVESQLHDVPVLGAGKQIDSSVPKSSRALPKAPSSQSASAAADTSTPGTPSKGDVSRSFPLQFGSISPGFMNGMQIPARTTSAPPNLDEQKRDQNILQARHDSYKSIPTMSIPSAPKPQKKNVVSANQPNIVESHPSSQAKRDSQVQVPVAPIATTDQKSTATPITGISIPISYQQPQIPLQFGGPGAQLQSQGIRASSLQMPMLLPVGNATQVQQQIFVPGLQSHPLQPQGMMHQGQSLGFAPQMGHQLAPQLGNLGIGVTSQFTPQQQVGIFGGPRRTVKITHPDTHEELKLDKRTDMLSDVGSSGPRVHPHVPPQSQPIQTFSPAHPINYCSTIQPNSYNSSMFFQNPTSLPLTSAQM…
	267	UN000705	4395	AAAAGTTTAGACATGGATAAGGTTCCTAAAATCAAATGGGGCGATCTTGAGGATGATGCCCTGATGCATCCTGGATGTCGTGAAAATGTTGGAGATTGTAAAGCAAGGTGTGGTCACATTGTGGATGGTAATGGGACTGAGATTGTAAAGTCAGGAAATGATGTTGTCTTGGTACCACAGGTTCCTCCTAATATGCAAGAAGCGAAAAAATCAGTTGTAATATTTGAAGATGTGAAGGAGCTCCCTGATGGGATGCCTTCATTGGCTAGACAGGAGGAATCTGTCGAGCAAAATTGCAAAGTTGTCACTGAGATCACTTCTGAGGATTTAGTTGTGCCCATTGCAGATGGAAAAATGGTGTCAGAAAATGATGCTGTTGGAATCTTTGGGGAAACATAC…	1465	KSLDMDKVPKIKWGDLEDDALMHPGCRENVGDCKARCGHIVDGNGTEIVKSGNDVVLVPQVPPNMQEAKKSVVIFEDVKELPDGMPSLARQEESVEQNCKVVTEITSEDLVVPIADGKMVSENDAVGIFGETYYECLNPISSDTAEVPNSSTLVTETSLSSTIDIEMKITPQLPFDKSEDGALVISEIPVSYQVGTGEVLQDPCPDQETDAEVSATATFEDRNVSEDSLVGMNLSKNQLISVLGEDESAESKERFRQRLWCFLFENLNRAVDELYLLCELECDVEQMKEATLVLEEAASDFRELKSRVEGFDHVKRSSSQQSKDVNPLNLKTDHKRAHALSWEVRRMASSPQRAEILSSSLEAFKKIQQERANKRVAHEMKGLGSARSTHYVSTDLQRK…
	268	UN000712	5643	GAGTATAAATACCTAACAGACGACTGCATTCGAGATTGGAAGAGCGCCACCTCCAATTTCAAGCTTCCCAATCCCGTCCCTACCCTTCGCTTCCTCTACGAGCTCTGTTCGATTCTCGTTCGCGGAGAATTGCCATTGCAGAAGAGTAAGCCAATATTGGAATCGGTGGAGTTTTCGGACAAACAACACAAGGAAGAAATGTCATCTACTTTGGCGGATATTGTCGCGCAAATGGGACAGGACCTTACAATCACTACAGACAATCGTGTCCGTCTCGTCAAAATGGCAAAATGGTTTGTGGAGTCTGCTTTGGTTCCCTTGAGGCTTTTTCAAGAGAGATGCGAGGAAGAATTCTTATGGGAGTCTGAAATGGTTAAGATGAGGGCTCAAGATGTAAAG…	1881	EYKYLTDDCIRDWKSATSNFKLPNPVPTLRFLYELCSILVRGELPLQKSKPILESVEFSDKQHKEEMSSTLADIVAQMGQDLTITTDNRVRLVKMAKWFVESALVPLRLFQERCEEEFLWESEMVKMRAQDVKNREVRVNTRLLYQQTKFNLLWEESEGYAKLVTLLCQSGSEASSRNTSVAMISIIKSLIGHFDLDPNRVFDIVLECFELQPENKIFLDLIPIFPKSHASQILGFKFQYYQRSEVNNPVPFGLYRLTAELIKSDFIDLDSIYAHLLPRDDEAFEHYNAFSAKRFEEANKIGKINLAATGKDLMDDEKQGDVTIDLFAALDIESEAVAERSPELDSNQGLGLLMGSLSVDDWYHAQILFDRLSPLNPVAHIQICEGLFRVIEKAISSAY…
	269	UN000715	6429	TTGCTGGATTTGGTGCTGTCTTGGACTGTTGAGGACATTCTCAATGAAGACCGTTACAGAGACAAGGTGGAAAAGATACCTGAAAGATTTCTCTCAGTTGAAAAATATCTCAGTTCATTTATTTTTCCCCTTATTGAAGAAACACGTGCGGAGCTATGTAACAGTTTGGAAGAAGTTTATGATGCACCTGTTGCTGAAATCATATCCATTGAGGAATATGAAGCTAGATCAGAGCTGTTTTACTTCATTGATATTTGTGGTTGGAAAAGTGGCTCAGGCATTGGTGGTACAAATTATAAACCAAGGCCTGGAGATATTTTTGTTTTGTCATCTATGAGAATTGAAGCTGCTTCTGATTTGAGCCGACAAGGTGTGCATTATATTTTAGCTTCAGTTGCG…	2143	LLDLVLSWTVEDILNEDRYRDKVEKIPERFLSVEKYLSSFIFPLIEETRAELCNSLEEVYDAPVAEIISIEEYEARSELFYFIDICGWKSGSGIGGTNYKPRPGDIFVLSSMRIEAASDLSRQGVHYILASVAGVEMDEEAQKGYKVKVSKSIEASNGMDNFRFAIYLTSITTNSRIRKGIKLGTSMNSNWNIIKAVLNPNLEEAACNTCFAEEKDAWANRIPRDLSFDLNESQMSAIFGAIAATQCKHSYSMKLVKGPPGTGKTKTVGCLLSALINLNLRTLACAPTNIAVLELCSRLLWMVKKSRFHVDENGFSFCSLGDLVLFGNKDRMFVTDDLQEIFLDFRVKRLAECLAPCTGWRHMISSLILLLEDCVPEYHMFSENERSKKKIGFMAFLRD…
	270	UN000716	3156	AGCTCCAGCTCAAGGTCGCTCAGGCCGTACGAGTCCTCAACCACGACTCAGAGTCCTCCAACCGAGTCGCCGCGAACCAGTGGCTCGTTCAGTTCCAGCAGAGCGACGCGGCCTGGGAAGTCGCCACCTCCTTGTTAACCTCTCCTCCCTCTTCTCACGTCGATCTCGAGGTCGAGTTCTTCGCCGCGCAGATCCTCAAGAGAAAGATTCAAAGCGAAGGATATTACCTGCAGTTGGGAGCTAAAGATGCTTTGCTACATGCTCTTCTCCTTGCTGCAGAAAGGTTCAGCCTGGGTCCTCCGCAGCTCTTAACACAAATCTGTCTTGCATTATCAGCACTTGTACTTCGGGCAGTAGAACATAAGAAGCCCATTGACCAGCTATTTACCAGTCTTCACA…	1052	SSSSRSLRPYESSTTTQSPPTESPRTSGSFSSSRATRPGKSPPPC*PLLPLLTSISRSSSSPRRSSRERFKAKDITCSWELKMLCYMLFSLLQKGSAWVLRSS*HKSVLHYQHLYFGQ*NIRSPLTSYLPVFTNCNGRITVILLF*RC*LFYQRKLSRTESPIVTSVLPGDANMAKSFFHILPLL*SSCCTSLSKGSRMVLNLMRGIGRFYDVC*VGCVLVASLRFHPPHCQHIHFLILSSTLCWSNPHLIWPTKFSWSLSVGMRVCPKFCCSEYSFLKKHFSYLLLLTETRK*LVVLPA*CPKLGKPHQL*LLKQVQKLLFLQTRF*VVWLFQVKTGRLQTQHCNFGVV*QTFL*A*FWIRRIIGNLWSTYFFLYSQHYLMLFCYVLR*MMLLTMVTL…
	271	UN000718	5376	ATGCATACAATGTGTCATGAATGTGGTTCGGGGGTGACGAATTCAGGCAGTGATGGTCATTGTCAGATTTGCGCCCGCCCCTTTTGTGCAGACTGCAAGAAGAAAGAAATTTCTTCAAAATTGGATGGTGAAGATGACCATCTTTTCTGCTGTAAGTTTTGCTCTCAGAATAATGGGAAAGAGTCTTCCACACCGCATGCTTTGAGCCCTTATGAAACACCACTAATCAGTCCAGTAATCTCTCTCTCAAGCTCTGGAAGCTTTGTCTCAAGCTGTGGTGAATTTCCAGTAGATGTCAACTTTCAGAACAGGGAGGATGCAGATGAAGGTATTCTTTCTTCCAGTCAAGAGGGCAAATGCAGTGTTAGGAACCAATCCAGTAGCTTGAGCTTCCAGATC…	1792	MHTMCHECGSGVTNSGSDGHCQICARPFCADCKKKEISSKLDGEDDHLFCCKFCSQNNGKESSTPHALSPYETPLISPVISLSSSGSFVSSCGEFPVDVNFQNREDADEGILSSSQEGKCSVRNQSSSLSFQIPMEEIDKSSSIVAGYLEDNYGDKLNLHVNASNDVEHINTGGALERIKNAVENTSQSLTSTEEVVERSQPLEIEKDPRIWLPPEPEDEEDDIECSVADNDDDDEFSDGTKWGQPSSLSSTGEEHGRRYRFREERQKALVDVMNGRFKAFLEKLLTEVCVAFSEEAGESWLDIVSSLSWEAATLIKPDATEGRAMDSTSYVKVKCIASGSRSQSQVIRGLAFKKNAAHKHMPTKYKNPRLLLLQGVLGQRVGGLSSFGSMEQEKDYLR…
	272	UN000720	303	TACCAACGCGGGGACGGTGTAGCCAATGGGCCTTCACGACTATTGAATTTCGATATCGATAAATGGGTTCATTTAAACTGTGCGCTATGGTCCAGCGAAGTTTATGAGACTATAAGTGGAGGGCTTATGAACTTTCCGGCAGCTTTACAGGTAGGCCTTAATCAGTCGTGTAGTGGCTGCCAACAACTAGGTGCCACCGTGCGATGCTTCAAAAACCGATGCACCCAAGTTTTCCACTTGCCCTGTGCAATAAGGGAGCACTGTGTTTTCTACAAAAACAAAACAATACATTGCCAGCAGCAT	101	YQRGDGVANGPSRLLNFDIDKWVHLNCALWSSEVYETISGGLMNFPAALQVGLNQSCSGCQQLGATVRCFKNRCTQVFHLPCAIREHCVFYKNKTIHCQQH
	273	UN000721	453	TTCAAAGGAGGGAAAAAAGAGACTCCACTTTTTCTCGTAGCGCCTGATGCAGAGGGACCGCTCTGCAAAGATTCCCCAATACCACTGTCATCAAAATCCTCCGTACGACAGCCCTGCCCTCTCTAGGCTAGGCTCCTCTGTTGCATCAACTGGATCCACTCCCACCGATCAAAAATTCAATTTTTTGGTACTACTTCTTCGGCCAATCTCAGACAAAGCTCTCTTCCTCATTTGTTTCTCTTCTCTTGCCTTCTTCATTAGTGAAAGGGATCTTCGAGAAAGCTCTTTGGCAAATTCTGTAGAATTCGGGCATATGGCGATGTTATTTCCAGCCAAACAGGCCAACTGGAATTTAAATCTCATTTTTGATTTATCCCGCCTGAGTACTTGTTGCCGCAG…	151	FKGGKKETPLFLVAPDAEGPLCKDSPIPLSSKSSVRQPCPL*ARLLCCINWIHSHRSKIQFFGTTSSANLRQSSLPHLFLFSCLLH**KGSSRKLFGKFCRIRAYGDVISSQTGQLEFKSHF*FIPPEYLLPQSLHWTFDLSNLVANCQQG
	274	UN000722	2022	CATGATTCAACATATCAGTCACAGGAGAGTATGATTGTAAACTTTCTAATGATAGACTTTTTACGCGATGCAGTGGTCGAGGTATTGTTAAATAAGATATTAGATGCTGCTGTGCAGAGTACACCTATATTCCTTGCAGGAGGCACAGTTCCATTACTACCGCTACTTGTAGCACAGCTACGTTATGTGGCGCAATCTCATAGTACTCTAATATATGAACGCATCTTGGAGATATTTAAAAAAGCCAGCGAACCCTCTAAACAAGATATTATAGTTCATGCTGAGTTCATATTGGACGCAAGCAAACATGATGATTTTGTACAAATGCTTTTGGATAATTTGCCTTCGAGCAAAGATTTATTTCATGTGAGCTCAATTCAGTCGTTGACAAAGCTCAAT…	674	HDSTYQSQESMIVNFLMIDFLRDAVVEVLLNKILDAAVQSTPIFLAGGTVPLLPLLVAQLRYVAQSHSTLIYERILEIFKKASEPSKQDIIVHAEFILDASKHDDFVQMLLDNLPSSKDLFHVSSIQSLTKLNLGKHMHEQIRHLILDYIKEDGFIDTTLPLMVNFLLKYLTEATDDDVIELVTTIRQILVWRLNTPMERETQIQLFNCIEQALVRSKKFYTFWQKMLSSLPGSQFRSLDFIMLLLLIHIKEDNYMYIENVLRRRIKLEHIAADIFIEMKSNYAAVLEQHTSILMELMHDFLREKNKIVADFAKASYGILFQICDSIQRGILRRLLQLTCDKSSRNFTNLSLELLRELQIKYRAEIQNWGTLLMPLLDRLSELTLTQTRLAMELLCSIA…
	275	UN000723	5433	GAGAACGGCGCCCGGAGGGCCAGTAGACGGCATGTTGAAGTTGATGGCGGGGAGAGATCCGGGAAAAGGTGCCGTCTTGGCAATGACCGCAGCGCCGGCGGCAGCAGCGAGAGGAATTACTGTGATGGTAGGCGCGGGCGAGGGGAGTGGTTGAGCAGGAAGCGTTTGCGGCGCGATCGGGATGAGATAGATAGGCGGGATCGCGAACGGGGAAGTAAGAGAGACCGGGACCGGGACGGGTACGAGAGGAGGAATGGGAAGGAGAGAGATAGGAGAGGATACTGGGAGAGGGATGCAAATGGGAAAGTTGTATTCCGGTCCGGGTCGTGGGAGGCAGAATCCAACAGGGATTCGAAGAGAGCAAAGCAAGAAGAGCAGGAAACAGTGAAGAGTCCGGAG…	1811	ENGARRASRRHVEVDGGERSGKRCRLGNDRSAGGSSERNYCDGRRGRGEWLSRKRLRRDRDEIDRRDRERGSKRDRDRDGYERRNGKERDRRGYWERDANGKVVFRSGSWEAESNRDSKRAKQEEQETVKSPEKKPEERVEKPLEEQARKYQLDVLEQAKKKNTIAFLETGAGKTLIAVLLIKSICAEMQRENKKILAIFLVPKVPLVYQQAEVIRDRTGFKVGHYCGEMGQDFWDARRWQREFESKQVLVMTAQILLNILRHSIIKMEGINLLILDECHHAVKKHPYSLVMSEFYHTTPKEKRPAVFGMTASPVNLKGVSSQEDCALKIRNLESKLDSVVCTIKDRKELEKHVPMPLEVVVQYDKAATLWSLHEQIKQLEVAVEEAAHSSSRRSKWQF…
	276	UN000724	5385	CCTAAATTCTTCTCCACAACCCTCCAATTCCCCCATCTCCGCTTCCGCAAACGCCGCCGCCTCAAAGCCACCTCCTACTCCTTCTTCACCGACCTCTTCTCCAATCTCCCATCCCCCAATCCCCTCGATCTAATCGCTCCCGCGCTCGGCGCTGCCTCCGGCGCCGCCCTCTACTTATCCAGTCGCCACCGCCGGCTACCTGATGAGGAATCGCTCTACCCTCCCTGCGACGTCGGCTGCTGGATTCTCGTCTCGAGCCCCACGCCTTTCAATCGCTTCGTCCTCCTCCGCTGCCCTTCGATCTCGTTTGAGGACAGCGATCTTTTAGAAGGAGTGAATGAGAGGCTGTTGAAGGAGGACACGCATTTCGTCAATTTGGATAGAGGGAGGATTCCAGCT…	1795	PKFFSTTLQFPHLRFRKRRRLKATSYSFFTDLFSNLPSPNPLDLIAPALGAASGAALYLSSRHRRLPDEESLYPPCDVGCWILVSSPTPFNRFVLLRCPSISFEDSDLLEGVNERLLKEDTHFVNLDRGRIPAAACRDEAGLQEKLAYQRVCIGAGDGGVLSLDWPANLELGKERGLDTTVLIVPGTAEGSMESSIQSFVCEALVHGCFPVVMNPRGCAGSPLTTARLFTAADSDDIRTAIQFINKSRPWATLMSIGWGYGANMLTKYLGEVGERTPLTAAVCIDNPFDLKEATRSFPHHIAMDQKLTGGLVHILRTNKELFQGRRKEFKVAEGLSATTLRDFEKAISMISYGFEDIEEFYSKSSTRQLVGRLKIPVLFMQSDDGTVPLFSIPRSSIAE…
	277	UN000725	2181	GGCACTTTTGTGCAGCCTTCTATACCAAAATTCGATGGCCACTATGCTCACTGGGCCATGTTGATGGAGAATTTTTTGAAGTCAAAAGAGTATTGGCAATTGATCGAGACAGGCATCACAGTAGCAGAGAGTGGATCTGCGTTGACGGAAGCACAACTGAAGGCCATTGAGACAGAAAAGCTTAAGGATCTCAAAGTGAAGAACTATCTCTTCCAAGCTATTGACCGTACAATCATGGAAACCATTTTCAACAAAGATATGGCCAAGATCATTTGGGATTCCATGAGGCAAAAGTATCAAGGCACCAACAGAGTCAAGCATGCTCAACTTTAGAGACTTAGAAGAGAATTCGAAGTCTTGCAGATGAAGGAAGGAGAAAAGGTGGATGAATACTTCGGC…	727	GTFVQPSIPKFDGHYAHWAMLMENFLKSKEYWQLIETGITVAESGSALTEAQLKAIETEKLKDLKVKNYLFQAIDRTIMETIFNKDMAKIIWDSMRQKYQGTNRVKHAQL*RLRREFEVLQMKEGEKVDEYFGRTLTIANKMKIQGETMEQVVIIEKILRSMTTKFDYVVCSIEESNNLDTLTIDELQSSLLVHEQRMVGNKIEEQALKVSSEEKSGTRGRGVFQGRGRGRGRQQFNRAIVECYNCHKLGHFQYECPSWEKNVNYAEHDGDQELLLMSYVEMHNSKREEVWFLDSGCSNHMSGDKRWFLELDETFRHVVKLGNNTKMDVMGRGNIRLHAHGATQVITEVFYIP*LKNNLLGIGQLQEKNLAILFQYGVCKIYHPVKGLIMQTIMSANRM…
	278	UN000726	819	GAAAAAGAGGATCTTATACGTAGATTGCGAGGCATATTAAATAAGCTAACGCCCGAGAAGTTTGATGCTTTGGTTGAAGAAATTATTAAGCTCAAAATCGATACACCTGATAAAATGGAAGACGTAATGGTTCTTGTGTTCGAAAAAGCTATAGATGAGCCGAACTTTTCCGTTTCATATGCACGTCTGTGCCATCGTTTGATTACTGAAGTGAAAGCGCGAGACGAACGAATGGAAAGTGGTACAAAGACTAACTTGGCTCAATTCCGTGCAGCTCTATTAGATAAAACAGAACGGGAATTCACACAAAACGTTACAAAGAGTAAAGCAAAGGAAAAGAAGCTGCAACCGATTATTGAAAAAATCGCTAAATGTACTGATGGAACCGAAAAGGCTGAA…	273	EKEDLIRRLRGILNKLTPEKFDALVEEIIKLKIDTPDKMEDVMVLVFEKAIDEPNFSVSYARLCHRLITEVKARDERMESGTKTNLAQFRAALLDKTEREFTQNVTKSKAKEKKLQPIIEKIAKCTDGTEKAELEAQLEEEERKIRRRSGGTVRFIGELFKISMLTGKIINSCIEALLNPNSEDQLECLCKLLTTVGAKFEQTPINTKESSRCYSLDKTIGRMQAIASKSDKEGAKVSSRVRFMLQDVIDLRRDKWQSKRNEAPKTMGQVEKE
	279	UN000727	5043	ATGCTTGGTTGATGAGAAGAAGGTGAGGAGAGGAAACGAAGTCGGCACATGTGTTCGGTCCCCGCTGCGGCTGGGACAACGAAGCCTGTAGATGCTGCTGCTGCTGCCAATTCTGCCTCACCCGTTTCCTTCAGCAAGGATGGACGGAAGATTAGTGTTGGTGACTCTGCACTTTTCCAGGCTGGAAATTCCCCACCTTTCATTGGAATAATTCGTTCGTTAATATCAGGTAAAGAGGATTGCCCTAAGTTGGTAGTAAATTGGCTTTATCGACCTGCTGACATAAAGCTTAGCAAAGGCATCTTTTTGGAAGCTGCACCGAATGAAGTCTTCTACTCTTTTCACAAGGATAAGATATCATCTGCATCATTGCTCCATCCATGCAAGGTTGCATTTCTT…	1681	MLG**EEGEERKRSRHMCSVPAAAGTTKPVDAAAAANSASPVSFSKDGRKISVGDSALFQAGNSPPFIGIIRSLISGKEDCPKLVVNWLYRPADIKLSKGIFLEAAPNEVFYSFHKDKISSASLLHPCKVAFLCKGVELPSGTSSFVCRRVYDIQNRCLWWLTDQDYINERQEEVDQLLDKTGLEMHAAVQSGARSPKPLNGPTSTQQLKSGSESVQNSTTSFPSQGKGRKRERGDQGQEPIKRERYSRADDGDSSHYKLESMIKAEIAKITNKGGLVNSEGVDKLVHLIHLDRADKKIDLAGRIMLTDVIAATEKPDCLDRFVELKGIPVLDDWLQEAHKGKAGDGNSPKENDKFVEEFLLVLLRALDKLPVNLHALQISNVGKSVNNLRSHKNLEIQ…
	280	UN000729	1443	ATGACAAAAGCTATACCAAGAATTGGTTCACGTAAGAATGGACGTAGAATACAAAAAGGAGTTATTCATGTTCAAGCGAGTTTCAACAATACCATTGTGACTGTTACAGATGTAATAGGTCGGGTGGTTTCTTGGTCCTCCGCTGGTACTTGTGGATTCAGAGGCACAAGAAGAGGGACACCATTTGCTGCTCAAACCGCAGCAGGAAATGCTATTCGTACGGCAGTGGATCAGGGTCTGCAACGAGCAGAAGTCATGATAAAAGGCCCTGGTCTCGGAAGAGATGCAGCATTACGAGCCATTCGTAGAAGTGGTATACTATTAAGTTTCGTACGTGACGTAACCCCTATGCCACATAATGGATGTAGGCCTCCTAAAAAAAGACGTGTGTAGAAATAA…	481	MTKAIPRIGSRKNGRRIQKGVIHVQASFNNTIVTVTDVIGRVVSWSSAGTCGFRGTRRGTPFAAQTAAGNAIRTAVDQGLQRAEVMIKGPGLGRDAALRAIRRSGILLSFVRDVTPMPHNGCRPPKKRRV*K*KLNGLQ*K*MIQ*SDQTIILVWFEKK*QYPLEHYSGSVLNQEQTVSVFIMAVSFCPRL*KVKQIR*VSRCERLYSEK*REHVSHVQNLRRYHMNILR*LVLKNQYMKF**I*KKLY*EVICMELVTHPFASGVLNT*LLKISSYRLLWN*SILHSI*LI*RSQFICVLN*KSRGIADIV*NPPITIKMEVIL*MLYSCLFEMRIIVFILMGVRMRNKRYFFLKYGRMEV*LLKKHFAKLPVL*LTYLFLFYMRRKRTFILI*KTIK…
	281	UN000733	4686	GCTGGGAATGATATTGACCTAAACAAAAGGCCACAACGGAAGGCCAGAAAGCGAAAACATAGACCAAAAGTCATTAGAGAAGGTACTGCTAAGAAAACCCGGAAGAAGGCCACGAATCAAGACAAAGTCACTAATCAAGAGACACCATTTCAAAAGAAAAGGTCTATACGGAAGAGAGGCCCAAAACCATCAGCCACCCGAGAGGAGCCTCTGACCAGAGAACCACGTCGAAGAAGATCGTGTAAGCAGCACTTGAATTTCGACTTGGAAGGTCTGGACAAAGATGGAAGCCCCGACGATGCTCCAGTTTTTGAAGTTCAGGAGGAAGACAATAGCCCCAATAAGGCATCAGTTCAAATGGATAAACAAAATGGCAGCATTGTGTGTGGTACAAGCACC…	1562	AGNDIDLNKRPQRKARKRKHRPKVIREGTAKKTRKKATNQDKVTNQETPFQKKRSIRKRGPKPSATREEPLTREPRRRRSCKQHLNFDLEGLDKDGSPDDAPVFEVQEEDNSPNKASVQMDKQNGSIVCGTSTLSHMWDSECQTAQDVIPSNESRSNVQLMKGIEESRAWDAFELTSHMKKMLEDYLQLPEDPNPPSIKEAMNNNAEASTSINGSGGNDNLMSQRAYSHIEEAEEIEFLTQSDMDNKTNTPKKNIPLAGSIQGRKRKERNTEDVFDFHSINFPKIYKKKRTSGCKRFTLRTTDVTPFTLDGYCKVGNENTRYPIAGEKNQIHQEFVEPQTGAINSKKLIDDVFELPIERRIKKKRKVICRIRKPLNMRIAARQCRKAIVVFRGPQSCVE…
	282	UN000737	6282	ACGCGCATCGATCAGTTTTTCGCTTCAAAGAAAAAGAGGCCTATATCACCCTCTCTGAAGGCTGAGATCCCTGATAAAGATGCAAAAGGTGCACTGGATGGATCTCCTAGTGCCAAAGGCACTCTGGACAGCTACCTAGTAAATTCTGACCATGATAATTGTCTGGTTAAACCAGCATATGAAGATTGTGGCGGAGCATCAAAGCATGATCCTGTTAAAAGGAATTTAACATTGGAGATCAACTTAGCTTCAGAAGTTATAAACAGATCCACATCACCTTTGAACAATTGTGAAGGTCTAGAGCATTCTGAACAGGCTGGAGTTGTAAGGAATGTGCAGCAATTAGCACCATGTAAAATTTCAGATGAGTTAAGTAGTTCTCATGATGCCTGTGACATT…	2094	TRIDQFFASKKKRPISPSLKAEIPDKDAKGALDGSPSAKGTLDSYLVNSDHDNCLVKPAYEDCGGASKHDPVKRNLTLEINLASEVINRSTSPLNNCEGLEHSEQAGVVRNVQQLAPCKISDELSSSHDACDISTEVHGKETVSSASGAQNLELRQFAADFLSLYCSELSSSVNSPSELKLHGNKRNGSPSLLFDNCKMCKKKQCISQCNQSQLEENICLEMECSEKVKSGLQSRPAEASSGHSGTLEVMDGKAEKEPDQVDIKAYSSFRKCNKVPNSSLIMAENCTTPGLSTNTLCTRETPKSLRRSSIVSPGDAFWNEAIQVVDGLFAPEDKVSVCIAKGVGHIKDQSGRTADNGSKSIEDMVFRHLELNATVGSIENSTKDSARLPAVDLQKDVSP…
	283	UN000738	5676	ATGGGGGCGTTTCGTCGTCAACTGAAAGCCATGCTCCGCAAGAACTGGCTCCTCAAAACCCGCAATCCCTATGCCACTTGCGCCGAGATTCTTCTCCCGACCATCGTCATGCTCATGCTGATAGCAGTAAGGACGCGGGTCGATACCCGAATCCACCCCTCTCAACCGTATATAAAGAAGGGGTTGTTTGTTGAGGTGGGGAAGAGCGAAATCTCTCCGAGTTTCGACAGTATACTTGAGCTGTTGTTGGCAACAGGGGAGTATTTGGCTTTTGCTCCTGATACGGAGGAGACTCACATGATGCTGAATTTGATGTCTTTGCGGTATCCTCTCTTGGAGATGGTGGGGAAAGTATACAAAGATGAGCTTGAATTGGAAACTTATTTACGTTCTGATGTT…	1892	MGAFRRQLKAMLRKNWLLKTRNPYATCAEILLPTIVMLMLIAVRTRVDTRIHPSQPYIKKGLFVEVGKSEISPSFDSILELLLATGEYLAFAPDTEETHMMLNLMSLRYPLLEMVGKVYKDELELETYLRSDVYGVSDQTQNASNPKIKGAVIFHEQGPQLFDYSIRLNHSWAFSGFPDIKTIMDTNGPYLNDLELGVDTVPTLQYGLSGFLTLQQVVDSFIIFSVQQNESDVAIGGSKLPSFHTFESPSLIKVPWTHFMPSNIRIAPFPTRAYTDDEFQSIVKKVMGVLYLLGFLYPISRLISCSVFEKEQKIKEGLRMMGLRDEIFYLSWFITYAVQFGISSGIITVCTMSSLFLYSNKTVVFTYFFLFSLSAITLSFLISTFFSRAKTAVAVGTLS…
	284	UN000739	2061	CATCGCATTGCCTTTTACGAGGTACCCGAACGCTTACGCTATACTTACTTGACAGCATCCAATCGTCAAGAAATGGTAGACAACTTAGAGGGTATGTTCCCCTGCCTGAAAGAGGAACTAAATATAAAGAACTACGCCATAAGATTCCAAACATTAGTGTAGCTGGAGGAAGTTGAATATTTTGTGAATTTTCGCAACTATGATCGTGAGAGGGCACATTTCACACGTGACGGCGAGTTTTTGTCACTCACTATTGAGAATCTTTCTGAACGCCGACCATCACTCGTTATTGGAGACACTGTGCGTGCCATTAATCCTTGGTGCAATGAAGACGATAAACGCAGTTATGATGGCGTTATCCACAAAGTGCTTTTCAATCGCATTTTACTAAAATTTAAC…	687	HRIAFYEVPERLRYTYLTASNRQEMVDNLEGMFPCLKEELNIKNYAIRFQTLV*LEEVEYFVNFRNYDRERAHFTRDGEFLSLTIENLSERRPSLVIGDTVRAINPWCNEDDKRSYDGVIHKVLFNRILLKFNEGFQSKYNGEDFRLEFYYSRFCFRKQHYAVSRIIKNVGEQFLFPSRVYTRDNPQLQIELDSDNNLMLQGTRCPWFNPLLNPIQKRAIRNILRGEAQNMPYIIFGPPGTGKTMTLVETILQLVKLIPSSRLLIGTPSNGSADLITTRLIACKQLQPGDFVRLVSQNQIEKELIPDHLMPYCATVDMAADGTCDDSMIVTESGMKLRCQMKYLGRHRLTISTCTTLGNFLQMGFPPGHFTHLLIDESGQCTEPEIIVPMSLLSQKRSQ…
	285	UN000746	2427	ATGGAATTGGATGCAAAGAAGATTGGTATGTATGTCAGGAAAGGGCTGATCTTCTCCACTAGAATCTGCTATAAATCTGCTCATGATCATCCCTTCGTTTTGGGCATGGTCATTTTCTCCTTTTTACTGTATAGATTTCTTCCTTCTGTGTTTGCGTTTTTGGTCTCTTCTTCTCCTGTCTTGTTCTGCACTGCTGTTCTTCTTGGAACCCTATTGAGTTTTGGGAATCCTGATATCCCTGAAGTTGAAGAAGATGAAAAGAAGACTCATGAGATTTCTTCTTTGAAAACTGGGGTTGTTGCTGGTGATCATGTTGTTGAGAAAGATGAGAGCTTTGCTGTAGAAACGCATGTAGAGAGAAGAGAAGTCAAAGAGAAGGCGATCCAAGAAGCCGGTCTG…	809	MELDAKKIGMYVRKGLIFSTRICYKSAHDHPFVLGMVIFSFLLYRFLPSVFAFLVSSSPVLFCTAVLLGTLLSFGNPDIPEVEEDEKKTHEISSLKTGVVAGDHVVEKDESFAVETHVERREVKEKAIQEAGLGGEDGVWNKVEKDAISSMARDVGEGIDEALIGRSIVIEEDVKEHHGEKQEIRERVYGDQGFVDKQESHENLTERVSEVGENIEGHHIDEQERENEGPADEMLNLLTEKRVDSSLGHSEYDSESDGSESSSPDASMADIMPMLDELHPLLDSEAPQPTHIPIDDSDASSQGSSQESDEGSAESGEDGDNQEEAHEDQEDKTEAVVKWTEDDQKNLMDLGTSELERNRRLENLIAKRMARKHQRIAIEKNLIDLDNNDVQTTLPMSGR…
	286	UN000749	447	CCCATGGATGGGACCTACGATCAGTGTAAGCCATTGGCTCGACTTTTGGGTGTTAATAATGAGTTTAGTTTTGATCTCAAAGCCGCAACCGCCAGCTATGCTTTTTGGAAAGATGTTAATCGGTGTATTCGGCTCCGCTGTTGCAGCTGCTTGGGTGGGCTCTGGGCTGGTAGCCAATATGTTTAGAGCTAAGGCCCATCGCCGAGAAGGTCACTGTATGGTGGCGTTCGGCACGGGACAACCACTTGGTTTCTACGGTTCCTGGCCATTATTCACTCTAGCACACCACAACACCGTGTGGTTGAGTGCTGAGTTAGTGGATCCGGGATCCCGGTTTACTGCCTATGCTATCTTGGGTGACGATATTGTCATCGGAGATGCAGAGGTGGCAGCTATGTA…	149	PMDGTYDQCKPLARLLGVNNEFSFDLKAATASYAFWKDVNRCIRLRCCSCLGGLWAGSQYV*S*GPSPRRSLYGGVRHGTTTWFLRFLAIIHSSTPQHRVVEC*VSGSGIPVYCLCYLG*RYCHRRCRGGSYVPEGGGHCQGSDFKSSD
	287	UN000758	3738	GACATTTCTGCACCACCAGACATTAGTGATTCTGCTCAGGCAAGTTTATCTGGCCAATGTGTTGATTATAAAAATGCTGATCATGCATGTTTTGAAGGGACTAATAGTTCTGATGCGCACTTAGAATCAAGGGATACAATTATAAAAGAGTTGGTGCGTGATAGTGAAGGTGATCCATCGGAGCGTGCAGTCAAACTAGCAAAAAGTCGGCAGTCAATATCAACAAATCTGGCTGTTTCTGTTCCTAAACGAAAAGTGATTCAACTCAAAGTGCCCGTGGAGAACAAGTCCGGCCACCTTCAACGGTTCGGTGCTGCTGTTAAAAGATTTAAGCCTCCTAGGTTGGATGACTGGTATAGACCCATTTTGGAAATAGATTACTTTTCTACCGTCGGCTTA…	1246	DISAPPDISDSAQASLSGQCVDYKNADHACFEGTNSSDAHLESRDTIIKELVRDSEGDPSERAVKLAKSRQSISTNLAVSVPKRKVIQLKVPVENKSGHLQRFGAAVKRFKPPRLDDWYRPILEIDYFSTVGLSSADKVENTTVSNTSLKEVPLCFTSPDQYIEIFRPLILEEFKAQLLNSHVEMPLTEMCCGSLCVLSVERIDDFHIIRCIPDDSEASSSKGCLENDLVLLTKSPMQNPSQNIHVVGKVERRDKNNKSRSYILVIRFYLESGSLRSNKVKRLLTERSKWYVSRIMSITPQLREFQALSSLKDNPMLPIILNPVDRARTYPEPRNADLSMLSLPQQQVLKSSFNDSQRQAIGVAIGTRDSKKSFELSLIQGPPGTGKTRTIVAIVSGLL…
	288	UN000762	4602	ATGGACATGCGATTCCCCTACTCTCCGGCGGAAGTCGCCAAGGTCCGCGTCGTCCAGTTCGGCATCCTCAGCCCCGATGAGATTCGGCAAATGTCGGTGGTCCAGATCGAGCACAGCGAGACGACGGAGCGGGGAAAGCCGAAGCCCGGCGGGCTTAGCGATCCCCGGCTAGGGACCATTGACCGGAAGCTGAAGTGCGAGACCTGCATGGCGAACATGGCGGAGTGCCCTGGGCACTTTGGGCACCTTGAGCTTGCCAAACCTATGTTTCATATTGGGTTTATGAAGACTGTGCTTACCATCATGCGCTGCGTGTGCTTCAATTGCTCCAAGATTCTAGTTGATGAGGATGACCTTAAATTCAAGCAATCTCAGAAAATCAGAAACCCCAAGCATAGA…	1534	MDMRFPYSPAEVAKVRVVQFGILSPDEIRQMSVVQIEHSETTERGKPKPGGLSDPRLGTIDRKLKCETCMANMAECPGHFGHLELAKPMFHIGFMKTVLTIMRCVCFNCSKILVDEDDLKFKQSQKIRNPKHRLKRVFDACKNKQKCEGGDEMDVQGQDSEEPVKKSRGGCGAQQPKLTIEGMKMIAEYKGSRKKNDEEPLPEPVERKQQLSAERVLSVLKRISDEDCMLLGLNPKYARPDWMILQVLPIPPPPVRPSVMMDTSSRSEDDLTHQLAMIIRHNENLRKQERNGAPAHIISEFAQLLQFHIATYFDNELPGQPRATQRSGRPIKSICSRLKAKEGRIRGNLMGKRVDFSARTVITPDPTINIDELGVPWSIALNLTYPETVTPYNIERLKE…
	289	UN000765	507	CTCATCCTTTCAGGCCCTAGCGGAGCGGGTAAAAGCACCCTTACAAAGTATTTGCAAGAAAAAATCCCCAAAACCCATTTTTCCCTTTCCACCACCACGAGGAAACCCAGAGAGGGCGAAGTTGATGGCTTGCATTATAATTTTGTCAGCGAAGAAGAATTCAAACAAGGCATAGAAAAAGGGCAGTTTTTAGAATGGGCGATCGTGCATAACCACTATTATGGCACTTCTAAAATCCCTGTAGAAAAAGCCTTAAAAGAGGGCAAAATCGTCATTTTTGATATTGACGTGCAAGGGCATGAGATCCTTAAAAAGCATTACCCTAACGCATGCTCAGTCTTTATTAGCACCAAAAACCAAGAGATTTTAAAAGAGCGCTTGCTTTTAAGGGGGACGGAT…	169	LILSGPSGAGKSTLTKYLQEKIPKTHFSLSTTTRKPREGEVDGLHYNFVSEEEFKQGIEKGQFLEWAIVHNHYYGTSKIPVEKALKEGKIVIFDIDVQGHEILKKHYPNACSVFISTKNQEILKERLLLRGTDSKETIEKRLINAYKEMQCLESFDYLIINEDLEKSKE
	290	UN000767	453	AAATTTGCGGATGACACGTTGATCTTCCGTGGTGCAAAGATAGAGCAAATTGTAAATGTGAAGCCATTCTTCTTTGCTTTGAAGCAGTATCGGGGCTTAGGGTTAACTTCTTTAAAAGTGAAACTCTAGGGGTGCAGTCATCTAAGGGTCAGTTGGAAGAGTTTGCAGATGCCATGGGTTGTAAAGCTGGTTCTTTTTTTTACTTCATATTTGGGTTTGCCGCTATACTTGAGGTCTACTTCTAAGAGAGTGTGGAATCCTATCATTGAAAGAGTGGAAAAGAAATTAGCTCTTTGAAAGGCTAATTATCTGTGCTTGGTAGCATGCATTACATTGATTAAATCTGTCCTTTCTAGCTTGCCGATTTACTACATTTCTATGTTCAAATGTCCCCTGTGT…	151	KFADDTLIFRGAKIEQIVNVKPFFFALKQYRGLGLTSLKVKL*GCSHLRVSWKSLQMPWVVKLVLFFTSYLGLPLYLRSTSKRVWNPIIERVEKKLAL*KANYLCLVACITLIKSVLSSLPIYYISMFKCPLCSPTLLKGFNRILFVARER
	291	UN000771	3645	TTAAAGTCTCAGCTTATCTCTGAGATTGAACATTCTACATCTGATATCATGGAGGTTGATGTAAAAGTCTGTGATATCTGTGGGGATACAGGTCGAGAGGAGATGCTTGCTACTTGTAGCAGATGTAGTGATGGCGCAGAGCACATCTATTGCATGCAAATAATGCTGGACAAAATTCCAGAAAGTGATTGGTTATGTGAGGAATGCCAGCTGAAGGAAGATGCTGAAAGACAAAAACTGGATAAAACCAAAGAAATTCCAGAAACTCCAAAAGCAACATATTTGGATGAAAAGGAGCTTTTATCGAAGTTGAAAAATAAGGCACAGGAAGCAGGGGCAAATCAAGCCATAAATGCCGTCATTACTCCCAAGGTTTCCACTAAGAGAGATGTAGATAGT…	1215	LKSQLISEIEHSTSDIMEVDVKVCDICGDTGREEMLATCSRCSDGAEHIYCMQIMLDKIPESDWLCEECQLKEDAERQKLDKTKEIPETPKATYLDEKELLSKLKNKAQEAGANQAINAVITPKVSTKRDVDSLEVALNSNKDAVETKVGSPGTASSSKRAALSQESSFKKLNAGKVKPVYPVPSSGSHSANSSQQKAQSPTAAGPHAPWMQARTQAGLGSLSRSASFSNPKPKLKQIREDVFQKQKLSREFTNGGTRKEGTLKTFGQSQSFKSTISGLSTIIDSKAKLISPITSRSDQSRGLKQGKDRIVLERKKSFRSDGPVFNSSLTAGTTTDLRKGVEHDGKLSTSKSTILVASKKSENLIAFDGSAGIKQQCNSEEKQPFQVGPKESVAASSCA…
	292	UN000772	5766	AAACCCAAGAAAACCTTGTTGAAATCCTCAAACAGGAAGAAGGACGATTCCGAGAGCACTGCAAAATCAAAAACATCTGTCATGCAGCTCGAAGACGACGCCCCAGACTTCCCACGAGGAGGACGGAGTGCTCTGAGTCGCCGGGAAGAGGATGAAATTCGAGAGGAAGTGGATGCGGAGTTTGAATCTGAGCAGAGAGATTCAAAGAAGAANAGGGAAGCACAGGAGACCCGCGANNACGTGGAGGAGGATGATATCGGCTCTCTTTTTGGAGATGGTATTAGTGGGAAACTACCAAAATATGCCAACAAGATCACTCTTAAGAATATTTCACCTGGAATGAAGCTTTGGGGAGCCATTGTGGAAGTCAACCCTAAAGACCTCGTGGTTAGCCTCCCA…	1922	KPKKTLLKSSNRKKDDSESTAKSKTSVMQLEDDAPDFPRGGRSALSRREEDEIREEVDAEFESEQRDSKKXREAQETRXXVEEDDIGSLFGDGISGKLPKYANKITLKNISPGMKLWGAIVEVNPKDLVVSLPGGLRGFVRVEEASDIFLENGIKELDHESSSLYSIFIVGQLVSCIVLHVDDDKKEGKGNKKIWLSLRLGLFHKSLTLDAVQEGMVLTAYVKSIEDHGYILHFGLSSFSGFLPRKSQDGSLDIKMNAGQLVQGIVKSIDKTRGVVYLDSNPDLLSKCVVKDVKGLSIDLLVPGMMVNARVHSTLENGIMLSFLTYFTGTVDIFHLQNSLPNATWKNDYYENKKVNARILFIDPLTRAVGLTMNSHLVHNKAPPPYVKTGDIYDSSRIV…
	293	UN000773	546	GCCGATAATTTTGGAGTTGCTGCCTATGCGGTATTCCTTTTTATGCTTACCATTTGGTGGGGCAAGGTATGGGGTGATGCTTCCGCCTGCCCGTACACTCATATGGAAGACTTGGTGGAAGGCAAGACATCTCTGAAGGAAGTCGCCTTACGCACGTGGGCCGAGTTAATGGGAGGTTGTTGTGTTTATCGCATAGTTCAGGTCTTTTGGTGGTTCGAATTTGCCGAAACACATAAGGGACGTGCTTTTGAGGAATGCAATGCTGATTTACAGGTGCACCCCTATCTCGGAGCCGCTATCGAAGGATTCGCCACACTACTTTGCCGGCTTGCATCGAAAGCGCTAAGCGAGAAAGAGCCGAAATTCAGCACCATCATTGACTCGTTCATCGGCACCAGT…	182	ADNFGVAAYAVFLFMLTIWWGKVWGDASACPYTHMEDLVEGKTSLKEVALRTWAELMGGCCVYRIVQVFWWFEFAETHKGRAFEECNADLQVHPYLGAAIEGFATLLCRLASKALSEKEPKFSTIIDSFIGTSLVVAAFNYSGGYFNPVLATALKWGCRGHTNLEHIIVYWIGACVGALLSV
	294	UN000783	915	ATTATTGGAGGTGGTCCTGCGGGTTTGAGTGCGGGGCTTTATGCCACTAGAGGCGGTGTCAAAAACGCCGTTTTATTTGAGAAAGGAATGCCTGGGGGGCAAATCACTGGCAGTAGTGAGATTGAAAACTATCCGGGCGTTAAGGAAGTGGTGAGCGGGTTGGATTTCATGCAACCATGGCAAGAGCAGTGCTTCCGCTTTGGCTTAAAGCATGAGATGACCGCCATTCAAAGGGTTTCTAAAAAAGGCTCTCATTTTGTTATTTTAGCAGAAGATGGCAAGACTTTTGAAGCTAAGAGCGTGATTATCGCTACCGGTGGTAGCCCTAAACGCACAGGCATCAAGGGCGAGTCAGAATATTGGGGTAAAGGCGTTAGCACTTGTGCGACATGCGATGGC…	305	IIGGGPAGLSAGLYATRGGVKNAVLFEKGMPGGQITGSSEIENYPGVKEVVSGLDFMQPWQEQCFRFGLKHEMTAIQRVSKKGSHFVILAEDGKTFEAKSVIIATGGSPKRTGIKGESEYWGKGVSTCATCDGFFYKNKEVAVLGGGDTAVEEAIYLANICKKVYLIHRRDGFRCAPITLEHAKNNDKIEFLTPYVVEEIKGDASGVSSLSIKNTATNETRELVVPGFFIFVGYDVNNAVLKQEDNSMLCKCDEYGSIVVDFSMKTDVQGLFAAGDIRIFAPKQVVCAASDGATAALSVISYLEH
	295	UN000785	5823	CTGGTGAATAAGCTGAAGAGCAATCGGTCATGGTTCTTGAACTCCATTTCCATGTTCAAGCCTCCCAATCACAAGTCCAAGTCCGCTCTGGATTCTCCTCATCTTTCTCTCGGTTCGCATCGATTGGCTGTAAAACCCGATCTGAAAGAAGCAGCCCTCAAAGTCAGCTCTTGCCTTTGTTTAGATGAAGTTCAATCGTACATTCTCGTCAACAGAACTTTGGAAGAAGACCATTTAGTTGAAGGTTACAATGTTCATGGATTTCTTCATTTGATACTGCTTCAATATTACATTGAGCGACAGTGCCTGCTGAAGTGTATCAGGCAGATTCTCCTACTTGCTTTATATGTTGGAAATGGATCTCACGAAAATGAAGCATTTCAAGAGGAGGCATTGCAA…	1941	LVNKLKSNRSWFLNSISMFKPPNHKSKSALDSPHLSLGSHRLAVKPDLKEAALKVSSCLCLDEVQSYILVNRTLEEDHLVEGYNVHGFLHLILLQYYIERQCLLKCIRQILLLALYVGNGSHENEAFQEEALQLVSGGLEKKLSSILEDLLSSKPPEHMEVDLVTLWAEEALIEVNLILDILFLAYYENFCTCKSEQWKRLCLLFKGILSESLSIGKLVISTEAGNSLHHAKVQLLLILIETLDLDNLLLLVHDEVPFREHHSTFSLVDMQDMDAIVSSFNALETVEAGPLILAWAVFLCLMLSLPEKGDHNPLMEIDHVAYVRQAFEAAPLNYITKILHNDISRESDSPVAGYRSVLRTLISAFVASYEMTQQTEDTTFTQILDILCKIYSGEESLCM…
	296	UN000786	3759	TCGGGTAAGAAAGTGAAAGCTGGGGGCACCGAAGATCTCCACCTGTTTGAAAGTTTTATGCAATTTGATGATACCCTTCTGTATGAGAGCGACTGGCTTGAAACTGAGTTGGTTGGGGAACTAGTGGATCTAAGTGGGGGAACCCAAGTATTAGAGTCTCTGGACTGCAAGAATGAACATGAGGGCAGTGATGTGGATGAAATAGAGAAAACTGAAGTCCTGAGCGATGATGATGAGGAATTGGATGATGAAACTAATGTTTGTAGAATTGAAAATTTTGACAATAAAAGAGAAACTGGACATGAAGTGATGGAGAAGAAATGCTTGACTCCTCTGTGCTCAGATGGTAAAGGCATAAAAGATAATGTGATCAACTCTGATGCATCAACGGATGGAGAG…	1253	SGKKVKAGGTEDLHLFESFMQFDDTLLYESDWLETELVGELVDLSGGTQVLESLDCKNEHEGSDVDEIEKTEVLSDDDEELDDETNVCRIENFDNKRETGHEVMEKKCLTPLCSDGKGIKDNVINSDASTDGEYNSGSVWKSFTSVRTASLRSSGLVAACSMTREGTGIMQNSTSGINQASQKQGNIEVIHPHPAVYGIEHDNISSLKDPTTFTASNVHEKIHMHDTESRIKNSRVRKLFFEHTPTGEMKEINKITTGKVDSPRFLSNEHAVAGLSYVGLQEPGIESQANALDMVDKFLLLNDVNLSGEVDTGKSLGEKSSLIPRVKGAQSLAKRACHRSPIRNAGVYDWVDSREDETGGDFFSKRKDLLLADIQFRNVKHLTFGRTENPVGRCRETGH…
	297	UN000787	4185	ATGGGTAGTCGTGGAAGGCCATTTTTTGATCTCAATGAACCCCCTGCAGAAGAAGATGAAGAGAGTATTGTGGTTCCCTATATCCAGCCTAAAAAAGCACTTCCTTCTTCAAGTGCTAGTACTTCTAATTTGTTTGGGTCATCAGGAAGTAGTCAAGGATTAGTCAATAATAATGCATTCTCACATGCATCTTCTGTTTCAGGCTTTCAGCCTTTTGTTAGATCTAAGGATGTGCATAACATTAAAGAGAATGTCACACAGAAGGCAGGCGATTCAAGTTCCAATCATGCCTTGCCGTCTACAGTAGTGAATTGCAGAGTGGAAAATAAATTAATTCACTCAGTCACTTCCAATGCATTCAATGCTGAAGCGGTTGAAAGAGAAGAAGGAGAATGGTCT…	1395	MGSRGRPFFDLNEPPAEEDEESIVVPYIQPKKALPSSSASTSNLFGSSGSSQGLVNNNAFSHASSVSGFQPFVRSKDVHNIKENVTQKAGDSSSNHALPSTVVNCRVENKLIHSVTSNAFNAEAVEREEGEWSDMEGSADALGNNASSKHEEMIECNGEVVQKQGVSEITDISGSEKASEGFSCPADHMDVKDKVVDNVKLENNPTSFGSEPQSYEQTNNSNKNPEDIKGEVIADVVEDSSSVFKQKDVKGVEASHALKCANNPGKKHKLDQHKEAMLGKKRSRQTVFLNLEDIKQAGPIKSATPRRQTFSSPMITRTVKENRVNALPSERTGERQVAPVTKDSKQVDEGSTPTELNDHKAEPNGDANAGLHVRSKKLNSGADFPVEVCLPPVPRQGSL…
	298	UN000789	1584	GGTGTATTGGCGCTCTCTACATACCGCATATTTATGCTTAAAAACTCTACCAACTCAGAGACATCCGTGCCGCTGGGACTGATCGAGAGTGTACAAACACGTGACCTGTTTCAATTAATTATAAATTGCAAGGACGCTAGTACAGTTAAATGTTCCTTTGAAACAGCTGAGCAGTGCGCCGAATGGCAGCGACGTATTCAGTTGTCTGTGGGTGTGCCGGAAACATTAGAATCACTTTTCGCATTTCCCTTCCACTCATATATGTGTGATGCGATTAGCATACAGAATGGCGATGTTGTTGGCAGATTAGCCGATGGAGGCGTCATTGACAATTCTACCGAGTACCTGGAACGCCTACAACGTGCCTCCCGCGATGACGAAGACTTTATGCGCGAAGTC…	528	GVLALSTYRIFMLKNSTNSETSVPLGLIESVQTRDLFQLIINCKDASTVKCSFETAEQCAEWQRRIQLSVGVPETLESLFAFPFHSYMCDAISIQNGDVVGRLADGGVIDNSTEYLERLQRASRDDEDFMREVERLGFDLNGAWRISKANEEFKLCPSYPQKLLVPGCISDEMLNEVSNFRGSRRLPAVVWRHRKSGAVIARCSQPEVGWFGWRSTKDEQLLKALADACAFDRGEQMRRLMQSTNPGLSMTSGENSPSSGENSHEEVALDEVRKILIVDARSYASAVTNRARGGGCECIEYYPCAEIEFMNLGNIHVIRRSFHALRQLCASPPDCPNWLGLLEKTMWLQHLSGLLAATVTVCHAIEKKGRPVLVHCSDGWDRTPQIVATAELCLDPFYR…
	299	UN000790	4167	ATGGATAGAAACCAGGAAGCGAGAAGAGGAGCCATGGCTGCAACGGTGAACGGATTGTCAAGACGGAGGCAGAGAAGCAGCAGCTTGAGAGATTCTCCTGAGGAAGATGGAGCTGTTGAGCTGCAGGAGTCAAGGTTTAGAGATCGTGCGAGTAAGAAGGATAGAGATCGAGATCGTGATAGGGATAGAGATAGGGATCGAGATCGGGATCGGGATCGGTCGAGCAGAAGCAAGCGCAGGAGAGGAGAGAGATTGCTCCATGGGAGTCATCGAGATGAAGGAGGCGAGGAGAGCTCGGAAGAGAGCGTCGATGATGAAGAAGAAGAGGAAGATGAAGAGGCTGCGGTGATGGCTCTTCGGTTGCAGCAGATAAATCCGCCGGCATCTGTCGTGTCGACA…	1389	MDRNQEARRGAMAATVNGLSRRRQRSSSLRDSPEEDGAVELQESRFRDRASKKDRDRDRDRDRDRDRDRDRDRSSRSKRRRGERLLHGSHRDEGGEESSEESVDDEEEEEDEEAAVMALRLQQINPPASVVSTSSSVPDHHLRKNFPAKIGRPGGPWKVAEEIIGVSVPRKARSAFAKRSQECWISGGSNGGEPTPRQASTSPARAATPAAAPLAAPISPSSSNASVRKKMKPIGSKHRPPKVSKTSSIQEAEIEFEIAEVLYGMTRGPTKQETASVSQKPNSRDANGSSNDAKSRGSSPISILPPTELPQSSVLQQNSNLTAVAPKRKRPRPPKMEEERPANLSVPDASVSSATKIEAQEQEKAENSLSKSEKKMPSAVENGCGTEELGNSQIPSIPS…
	300	UN000792	507	GCACGATCAAATCAAAGCGTTTGCTTAAGCGTTTGGCTCAATTGGAGAGTNCTGAATTGTTAAAGTTTAATCAATTGAAATTCCGAAAGAAACAACTAAGTTCGCCAAGTCGNGCCATCCATGATTGGGGTTTGTTTGCGATGGAACCAATTGCGGCCGATGAAATGGTTATAGAATACGTTGGACAAATGATACGTCCTATAGTTGCTGATTTGCGGGAGACTAAGTACGAGGCAATAGGAATCGGCAGCTCATATTTATTTAGGATTGATNATGGAAACATTATTGATGCCACAAAGTGTGGTAATTTAGCTCGCTTTATTAATCACAGTTGTAACCCCAACTGCTATGCTAAGGTCATAACTATAGAGTCTGAAAAGAAGATTGTGATTTATTCCA…	169	ARSNQSVCLSVWLNWRVLNC*SLIN*NSERNN*VRQVXPSMIGVCLRWNQLRPMKWL*NTLDK*YVL*LLICGRLSTRQ*ESAAHIYLGLXMETLLMPQSVVI*LALLITVVTPTAMLRS*L*SLKRRL*FIPNNR*E*TKR*LTIINFH*RTRKFLACAEHKAAGGLS
	301	UN000795	381	TCCTTGCAGGACTTCCTTTCCTCCAAGGGTCTTGTGCATCAGAGATCTTGCCCTCATACTCCCCAACAAAATGGCCTTGCTGAGCGGAAACATAGGCACCTAATGGAAACCACTCGTACCTTATTGACAACCATGCATGTTCCTCGTTCCTTTTGGGCAGAAGCCCTCTCTACCTCAGCCTATTTAATTAATAGATTGCCTACTGCTGTCTTGAGAGGTGACTCTCCCATTTATCGTCTTACTGGCCAGTCTCTAGACTATAGTCGTCTTCGGGTCTTTGGTTGCACCTGTTATGTTCTTCTCCCTTCTACCTCTCGTTCGAAATTAGACTCGCGTGCGTCTCGTTGTCTCTTTCTTGGCTATGCTCAAGAACAAAAAGGT	127	SLQDFLSSKGLVHQRSCPHTPQQNGLAERKHRHLMETTRTLLTTMHVPRSFWAEALSTSAYLINRLPTAVLRGDSPIYRLTGQSLDYSRLRVFGCTCYVLLPSTSRSKLDSRASRCLFLGYAQEQKG
	302	UN000797	1119	TTTTCAAAAAGTGAGACTGAGCGGATAATATCGGAAATGCTTTCCGCAGGCCTCATTCGTCCTAGCAATAGCCCATATTCCTCTCCAGTCTTGCTTGTCAAGAAACATGATGGATCATGGAGGCTGTGTATTGACTATAGGGCCTTAAATCAAATCACCATCAAGGATAAATTCCCTATTCCAGTGATTGATGAGTTATTAGATGAGCTGCATGGAGCACATTTCTTCTCTAAGCTTGATCTGCGATCAGGCTATCATCAAGTTCGTATGCATCCAAGTGACATCCCCAGGACAGCTTTTCGAACGCATCAAGGACATTCTGAATTCTTGGTGATGCCATTCGGCCTTACCAATGCGCCATCAACTCTCCAGTCCCTCATGAATGAAGTTTTCAAAGCA…	373	FSKSETERIISEMLSAGLIRPSNSPYSSPVLLVKKHDGSWRLCIDYRALNQITIKDKFPIPVIDELLDELHGAHFFSKLDLRSGYHQVRMHPSDIPRTAFRTHQGHSEFLVMPFGLTNAPSTLQSLMNEVFKAYVRKFILVFSDDILIYSRNWEDHLNHVEITLSPLRNHKLHVKMEKCQFGQTKVNYLGHIISQKGVAVDPDKISTMIEWPNPTTIKALRGFLGLTGYYRKFIQGYGKIAGPPTSTPRKDSFFWTLAADQASEKLKQAMTQSPVLALPDFSKPFVVECDASGTGVGAVLMQDHRPIAFFSQALQGKNLNLSTYEKEILALVLAIPKWRPYLLG*RFIVRTDHNSLKKLWEQKITTLAQQRWL
	303	UN000800	1101	TGCTGCGGCCGTAAATACACATTCAACCCACAGGTGCTATGTTGCTATGGAAAACAGCTTTGTACAATACCACGTGATGCCAAGTATTACAGCTACCAAAATAGTCTAAAGGATTATGGTGTTGCCTCAAACAGATACACTTTCTGCCAAAAATGCTTCAACGACATTCAAGGAGACACCGTTACTCTGGGCGATGATCCACAGCAGTCGCAAACTCAAATTCGCAAGGACCAATTCAGAGAGATGAAAAATGATCATTTAGAGTTGGAGCCGTTTGTTGATTGCCAGGAATGCGGTCGCAAGCAACATCAAATTTGCGTGCTCTGGCTAGATACCATTTGGCCGGGTGGTTTCGTTTGTGATAATTGTCTTAAGAAAAAGAATTCCAAACGGAAGGAG…	367	CCGRKYTFNPQVLCCYGKQLCTIPRDAKYYSYQNSLKDYGVASNRYTFCQKCFNDIQGDTVTLGDDPQQSQTQIRKDQFREMKNDHLELEPFVDCQECGRKQHQICVLWLDTIWPGGFVCDNCLKKKNSKRKENKFNAKRLPTTKLGIYIETRVNNFLKKKEAGAGEVHIRVVSSSDKCVEVKPGMRRRFVDNGEMSSEFPYRAKALFAFEEVDGVDVCFFGMHVQEYGSECPQPNTRRVYIAYLDSVHFFRPRQYRTAVYHEILLGYMDYVKQLGYTMAHIWACPPSEGDDYIFHCHPTDQKIPKPKRLQEWYKKMLDKGMIERTIQDYKDILKQAMEDKLTSAAELPYFEGDFWPNVLEESIKEL
	304	UN000804	537	AAATATGGGAAAGGTGACTGGCGAAGCATATCTAGAAAATTTGTGGTTTCAAGGACTCCTGCTCAGGTGGCCAGCCATGCACAGAAGTACTTCATACGCTTGGAATCAAACAAAAGGCGGCGGTCTAGCATTCATGATATTACCAATGTGGGAAATGAAGACATATCGCACCCCCAAGAATCCATCATTGATCAATCAAATGGTCCTATCGGAGCTACTGGGGAATCCATCAAACAATCTCGCCAACCCCCATCAACCACTTCTGGAGGTAGCATGAATTCGAACAAAAGGCGGCGATCAAGCATTTATGATATTACTGGTGTGGGAAATGGAGACATATTGGTGCCCCAAGCACCCATTACTGGTCAACCAAATGGGCCTACCGGAGAACACTCTTCC…	179	KYGKGDWRSISRKFVVSRTPAQVASHAQKYFIRLESNKRRRSSIHDITNVGNEDISHPQESIIDQSNGPIGATGESIKQSRQPPSTTSGGSMNSNKRRRSSIYDITGVGNGDILVPQAPITGQPNGPTGEHSSPPPSSTFGVYGPLTIGQPVGESLVSATSTPVPAPPHMAYDVGAPYR
	305	UN000807	5652	GGTTCTGGCATTGCGGATAATGTTCCTTCTTGTCTGGGGAACAGGGACATAGATGCAATACTCAGAGCAGCAGATGAAATTCAAGAAGAGGACGCCAATGTTGCGAGAATATTGTGTGAGCATGCTTATTCATTGGCACAAAATTTGGACCCCAATAGCGAGGGTAGAGGTGTCTTACAGTTCAAGACTGGTTTAATGTCAGTCATCAAGCAAAAGCTGGCAAAGAGGGATGGTGGGAGCATAGACCGAAGCCAAGACATTGCTCGCTTACAGGAATTTTATAAGAAATATAGGGAGAAGAATAAAGTTGATGAGCTTCGTGAAGATGAAATGAAGTTGAGGGAATCAGGCATCTTCAGCGGTAACCTTGGAGAGTTAGAGCGCACAACTGTGAAACGA…	1884	GSGIADNVPSCLGNRDIDAILRAADEIQEEDANVARILCEHAYSLAQNLDPNSEGRGVLQFKTGLMSVIKQKLAKRDGGSIDRSQDIARLQEFYKKYREKNKVDELREDEMKLRESGIFSGNLGELERTTVKRKRVFATLKVLGTVVEELTKEVSPEEAERLIPEEMKRVMESDAAMTEDLIAYNIIPMDAQTITNAIVSLGEVRAAVSAIKYFSGLPELPSSFSVPSARNADMLDFLHYVFGFQKDNVANQREHIVHLLANEQSRLGIPEESEPQMDEAAVQKVFFKSLENYMKWCNYLNKPASWNNLEALSKEKKLLFVSLYFLIWGEAANIRFLPECLCYIFHQMVREVEEIMRQEIAQPANSCNSQNGVSFLNQVIAPLYEIVAAEAANNNNGRA…
	306	UN000811	633	TGTGGAGATTGCGGAGCTTCAGATCCCTCATGGGCCTCAATAAATCGTGGTATTTTACTTTGCTCTGATTGCTGCTCCGTACATCGTAGCCTTGGCCGCCATATATCCATGGTAAAGTCATTACGTCAAGGAACTTGGGAGCCATCAGTTTTAAATTTTGTTAACTCGCTCAATTCGCACGGTGCAAATAGTGTTTGGGAGCATCATCTTCTTGATGCAAACTCGACAAAAAGTGACAAGGGTGTACCGCGTGTTAGAAAACCAAGCCCCAAGGATCCGCTGCATCCTACCAAATCAGATTTCATTAAATCGAAACACATAAACTTAGTATTCGCTTTAAAATCTAATCTTCAAGAGGAAGGTGTAATTTCTGGAATAAATCTTGAGAATGAACTTAGC…	211	CGDCGASDPSWASINRGILLCSDCCSVHRSLGRHISMVKSLRQGTWEPSVLNFVNSLNSHGANSVWEHHLLDANSTKSDKGVPRVRKPSPKDPLHPTKSDFIKSKHINLVFALKSNLQEEGVISGINLENELSRQLHASVRTSNLETSLRLIVQGANPNYFHDEKRSTPLHVAAKFGQASQIELLIVYGADINAIDGNGLTPLEVAKVNNH
	307	UN000812	5766	GGAAATCGACTATTGGGATTTATGTTTGGAAATGTTGATGGTTCGGGTGATCTTGATGTCGATTATCTTGATGAGGACGCGAAAGAACATATTGCTGCGCTGGCTGACAAGCTTGGTCCATCTCTTACGGACATCCATTTGTCCATAAAACTTCCAGCCACTGCAGGGGAAACTTCTGAACAAGACTATGCTGAAAAGGCTGAAGATGCTGTTGATTATGAAGACATTGAGGAGCAATACGAAGGGCCAGAGGTTCAAGTTGCATCGGAGGAAGATCACTTGCTGCCGAAGAACGAATTTTTCTCTGCTGAAGTCTCTCTTGCATCTTTGGAGCATAAAACTTCTGTATTTGATGAGGAGAACTACGATGAGGATGGAGACTTCGATAAGGAACCTGAT…	1922	GNRLLGFMFGNVDGSGDLDVDYLDEDAKEHIAALADKLGPSLTDIHLSIKLPATAGETSEQDYAEKAEDAVDYEDIEEQYEGPEVQVASEEDHLLPKNEFFSAEVSLASLEHKTSVFDEENYDEDGDFDKEPDVVENKPDAQRTLSASEEDDFLTKKEIFSAEVSLASVEQKATVFDVENYDDDEDLGKGPEEVENSADAQTALSGEHNALFIEKEKSIDDDLPSLGSFEAENVSSTNLEDFQVEESAVPQELFDERRGAPLPVLCIEDGMVVLRFSEIFGVNEPLKKREKKEHHRYPIPRDGFKTIDVSDNVEEDEEAFLKGSCQCLFTTKHSFMPEDDHDPAKENDEEEEIFNVTEGLGVLHTHHDEQKKDSCLSALPMKEGVEVDLSAGWQSPSCH…
	308	UN000813	5592	AGGAAGAAACAGAAACGACTCGACGCCATCCGCGACCGTGTTCTCGACCCTGTGGAGCACGGTGCCGGAGGTTCGGGGGCTGTCGACGTCGACCCCAGTTCGCTACGCCGGAGCACGCGGCAGAGGAGGCCCCCTGCTGTATCCGATCTCTCTCCCTCGCCCCGTAAGAAACGGTCCAAGGGTAAGAAAACTGCTAATTTGGGCGGAGGGGGGAGGAGGAATGAGGGTGATGCTGATAGGAAGAATGGGAAGAGGAAACGGGGTGTGGAGAAGGTTTTGGAATCTCCCAATTCAGGAGATTTGGGGGAAATGGGGAATTGGGGGACGAGGCTCAGATCTAGGGCTAGGAATGTAGGCGCTGCAACGAAGGAAAAGAGGTCTCCTCCTCGTGGTAAACGG…	1864	RKKQKRLDAIRDRVLDPVEHGAGGSGAVDVDPSSLRRSTRQRRPPAVSDLSPSPRKKRSKGKKTANLGGGGRRNEGDADRKNGKRKRGVEKVLESPNSGDLGEMGNWGTRLRSRARNVGAATKEKRSPPRGKRRLFKELDGFGNKDELVDEKTIERPEGGVSWGSKSRRSGAEKESIDADNGDQDAGPSNAKEGSGDQPLQEHLSPLNKEAALLPAENATDGGSGSISDDGSAQEHEKEDIRITAEPESAEPGSDQQELHHWEPVEGQCGNANGDCSNDSKASKGTIRSTDLLERDDQIDAHPDNICSKHISDDNGIKVDQSDPISNDSVVDQPRIREGRRCGLCGGGTDGKPPKRLVRDSAESDHEVYGGSSASEEPNYDVLDGFGDESGWLGPLLGP…
	309	UN000814	1257	GTTTTAATTGTGGGGAATAAGGGGCGAGAGTATGCTTTGGCTCAAAGGCTTCAGCAAGATGAGCGAGTGAATGCTTTGTATTTTTGTTTGGGTAATGGTGGCACTCAAGATTTAGGCGAAAATCTAGAATGCGAACATTACGAGCATATCGTGGAATTAGCCCTGAAAAAACAGATCCATTTAGCCATCATTTCAGAAGAAGAGCTTTTGGTTTTAGGGCTTACAGAGATGCTAGAAAAAGCGGGTATTTTAGTGTTTGGGGCTTCTAAAGAAGCGGCTAAGTTAGAGGCTTCTAAAAGCTATATGAAAGCTTTTGTTAAAGAATGCGGTATCAAAAGCGCGTCTTACTTTGAAACAAACGACTTAAAAGAAGCTTTGAGTTACATTCAAAACGCTTCT…	419	VLIVGNKGREYALAQRLQQDERVNALYFCLGNGGTQDLGENLECEHYEHIVELALKKQIHLAIISEEELLVLGLTEMLEKAGILVFGASKEAAKLEASKSYMKAFVKECGIKSASYFETNDLKEALSYIQNASFPLVIKALNKNTSIVHQEEEAIKILEDAFKQSNEPVIIEPFLEGFELSVTALIANDDFILLPFCQNYKRLLEGDNGVNTGGMGAIAPANFFSNELEEKIKNHIFKPTLEKLQADNTPFKGVLLAEIVIIEEKGVLEPYLLDFSVRFKDIECQTILPLLESSLLDLCLATAKGELNSLELVFSKEFVMSVALVSRNYPTSSSPKQTLYIDPVDEKKGHLILGEVEQDNGVFESSGGRVIFAIGRGKSLLEARNHAYEIAQKVHFEGM…
	310	UN000818	4410	TGGACTGCATTTTGTGGACAATCAGATTGTTCGTATGATGGTGAAAAGACTTGCAGTCCTGGTTTCCTGGGCATCACAAGTTCTTCTTCATGTATTAACCATACAATAGTCATTTTCATTGACGTGGTGCTCTTGTTCATGTTCCTTTTCAATGTCATTTGTAAGGCCTCAAGAGTAGTTCAGAGGCACGTACTTTTTCAAGGAGTTTCACTTTACCAGAAACTTTCTGCTATTTTCAATGCTGCCCTGGCGTTGGTTTATTTTTCTCTAGGGGTTTGGATTTTGGAGGAGAGATTGAGAAAGGGTCAGAGTGCTGCACCTGTGCATCAATGGCTAGTGTTGTTGCTGCATGGACTCACATGGGCATTGCTGGGCTTAACAGTGAGCCTTAAGGCAGGA…	1470	WTAFCGQSDCSYDGEKTCSPGFLGITSSSSCINHTIVIFIDVVLLFMFLFNVICKASRVVQRHVLFQGVSLYQKLSAIFNAALALVYFSLGVWILEERLRKGQSAAPVHQWLVLLLHGLTWALLGLTVSLKAGQLSKIIIRIWSTIACLLAGFLCVTSILLVYRDGEAYSIKVVLDVLSLPGAILLVFCVVNGSKRAETLLSIDDTLYSPLIGEPDGRGTDSDSSVTPFAYAGFLSRMSFWWLSPLLKRGREKLLEEKDIPQLCKEDQAESCYQLFLEQLNRQKQKQSSPPSMLWTIVSCHQREILVSGFFALLKILTLSAGPMLLNAFIRVAEGNADFRYEGYLLAGGLFVAKCLESLAQRQWYFRTRTIGLQVRSLLSAAIYQKQLRLSNTARITHS…
	311	UN000819	5946	ATGGCCCAACAATCATCTCGTCTCCATCGCCTGCTCACTCTATTGGACACTGGTTCGACTCATGCAACGAGATTCGCAGCTGCTCGGCAAATAGGTGAGATTGCAAAGTCGCATCCTCAAGACTTAAATTCTCTCCTTAAAAAGGTTTCCCAGTATCTTCATAGTAAGAATTGGGAGACAAGGGTTGCTGCTGCTCATGCTGTGGGAGCGATTGCTGAGAATGTTAAGCACAGGTCTCTGAAAGAACTGTTTGCATGTGTTGAATCGGAAATTTTGGAGACTGGAACTTCTGATACCGTGAAAGACATGATGATGGGATGGTCACCTCCTAAAACTGTAGGAGGCCTCTCTTTCAGAAGCTTTGAAATTACAAAGGTGTTGGAATTTGGTGCTCCACTA…	1982	MAQQSSRLHRLLTLLDTGSTHATRFAAARQIGEIAKSHPQDLNSLLKKVSQYLHSKNWETRVAAAHAVGAIAENVKHRSLKELFACVESEILETGTSDTVKDMMMGWSPPKTVGGLSFRSFEITKVLEFGAPLLASVGQEYDISNDSTKNPAERLARQKQNLRRRLGLDVCEQFMDVNDMIRDEDLLVSKVHSHGNGMDHGYYISQSGHRIQQLGSNMVPNFISKRLSARELNLLKRKAKVNAKDHPKGWSEDDDFEAPHSQTSATPKGTCSDPLNSDKVFTDSIYEDDTFEHDGDGSWPFHHFVEQLIHDMFDPIWEVRHGSIMALREILTHQGASAGVFIADLSSESSRLVEVDNSHNLGNATKRLRETVLDTQVSVCESEPNLKRQKSESDPNLFV…
	312	UN000822	882	CATTTATCCGTCGATGATCGTGATGAGAATGGCACCACTGGACTTATGGTTGTTGCTGGACGTGGCTTAACTGTTTTTGTGCGGGAATTTTTGGCTCGCGGTGCAGATGTCCAAGCGGAGGACAATGACAACTGGACAGCACTATTGTGCGCGGCCAAGAATGGCCACTTCGATATCGTACAATTGCTTATCGATAATGGTGCAGATGTTGAGCACCGTGATATGGGCGGTTGGACGGCGCTAATGTGGGCTGCATATCGTGGTCATACCGATCTGGTGCGCTTTCTGCTGGAGAAGGGCGCAGATGTGAATGTGCATGGCAACTACCATCTGGGCCCACTTCTTTGGGCTGCCGGTCGTGGCTTCAAGGAGATTGTTGACCTCTTGGTGCAACGTGGT…	294	HLSVDDRDENGTTGLMVVAGRGLTVFVREFLARGADVQAEDNDNWTALLCAAKNGHFDIVQLLIDNGADVEHRDMGGWTALMWAAYRGHTDLVRFLLEKGADVNVHGNYHLGPLLWAAGRGFKEIVDLLVQRGAKVNVGDKYGTTALVWACRKGNAEIVDTLLKAGANVDTAGMYSWTPLLVATSGGHTDCVTSLLEKRPNVNALDKDGMTALAIASREGFQEICAALIAAGAYINIQDRAGDTPLIHAVKGGHRGVVEALLKKHADVDIQGKDRKTGIYTAVEKGHTHIVKLL
	313	UN000824	399	AGAGTTGCATGGATGAATCACCCTACTGGTGTTATGAAGTTGAATTTTGATGGTAGCTTTGTTCGTTCTTTGCGAAAGGGATGGACAGTAGGAGTTATAAGGGATTGGAACGGTAATGTTGTAAGGAGCTTCTCTAGGCCGATTGACTCTTCGGATGCTGATGAAACTGAGTTAACTGCTATTCTTATTGGTTGCCGAGAGTTGCTTCAGATGGATGGTTATAGTGCTATTCTTGAGGGAGATTCTTTCTTGGTAACTCGATGGTGTTCAGGAAGTTCTTCCAGTCCTTAGAGATTGGCAGATTGGGTGGAGGAGGTGCAGGATATTTCAAGGAGGTTAGGAGCCAACTTCACCCATATTCTTAGCGAAGCAAATGTTGTGGCAGATAGTCTTGCACAG	133	RVAWMNHPTGVMKLNFDGSFVRSLRKGWTVGVIRDWNGNVVRSFSRPIDSSDADETELTAILIGCRELLQMDGYSAILEGDSFLVTRWCSGSSSSP*RLADWVEEVQDISRRLGANFTHILSEANVVADSLAQ
	314	UN000825	4650	GACAATGTTATTGTGATTCCAAAGCGCCCAAGAGGCTTTTCTGGTCGAAACAAATTTCAAACAGTAAATTCTGGTTCAAGGAGAGAGATCAGTCGGCCTCCTACTTCAAAGGACAATAGTGGTGCTGAATTTTCCAGGAGCAAGTTAATTGGGGTTCGTAAAGAACCTGTCCAGGCATTCTTAGATAAAAGGAAAAGGATTCTTGACAAAGTGAAGGGCAATAGAACTAATTCAAATTCAGTTTCACAGTTTAAGCATGAAGACATCGATCCAGTCCAATCTGGCTCTCCTGCTCCAAAGAGGGCTCGCAGGCTCCGTCTGAGGGAGAAGAAATATGAAGGAGAGAAGCAAACTCAGGAGGACAAGCGGCCACTACTTGACCCCTCTATAAATTCCATT…	1550	DNVIVIPKRPRGFSGRNKFQTVNSGSRREISRPPTSKDNSGAEFSRSKLIGVRKEPVQAFLDKRKRILDKVKGNRTNSNSVSQFKHEDIDPVQSGSPAPKRARRLRLREKKYEGEKQTQEDKRPLLDPSINSIENSQENDEENLEQNAARMLSSRFDPSCTGFSGRGAALKSQSADGLSLSPFLQRAYKSLGKDASMGSETAGRKLRPRNQQIQKGFFKRQRRHFYEVCYLDMDPYWVVNQRIKVFWPLDQSWYYGIVKAYDTVTKSHHIKYDDRDEEWINLQNERFKLLLLPDEVRGKSYPEKXREGTKALAXEDVDANFMDENCMGNFTESEPIISWLSRSTLRVKSSSHDIMKKQKQSHVSKNSPQHIFSENSVEMPNGCSDIGPSSSGTSKLFVS…
	315	UN000828	1560	CGTGTCTTGAAGAGCGAGGCTCAAGAGGAGAAAGCGGAAATGGCCCGCTTGTCGTCTTTTATAGGTGCTATTGCTATTGGTGATCTCGTGAAAAGCACTTTGGGACCTAAAGGTATGGACAAAATCCTAGTAGCTCATGGTCGCAATGCTGGCCAGGTTGAGGTCACAAATGATGGCGCCACCATATTACGCGCAGTTGGTGTAGATAATCCTGCGGCGAAAATATTAGTGGACATGTCACGTGTACAAGATGAAGAAGTTGGAGATGGAACTACTTCAGTGACAGTACTTGCAGCTGAACTTTTACGTGAAGCTGAGAAATTGGTCGAACAAAAACTTCACCCACAAATTATTATCGCTGGCTGGCGTTTGGCTACTCAAGTGGCACGTGAAGCCTTA…	520	RVLKSEAQEEKAEMARLSSFIGAIAIGDLVKSTLGPKGMDKILVAHGRNAGQVEVTNDGATILRAVGVDNPAAKILVDMSRVQDEEVGDGTTSVTVLAAELLREAEKLVEQKLHPQIIIAGWRLATQVAREAL*KLXQDNSANDDKFKEDLMNIARTTLSSKILHQHKEFFAKLAVDAVLRLKGSGELHAIQIIKKRGGTLDDSFLDDGFLLDKKPGVHQPQRIEKAKILIANTPMDTDKIKVFGVRIKVDSLAKIADLELAEKEKMKDKVQKILNHNCNVFINRQLIYNYPEQLFADAGVMAIEHADFDGIERLALVTGGEIVSTFENPALVKLGECDLIEQVMIGEDTLLRFSGVKLGEACTVVIRGATQQIIDEADRSLHDALCVLAATVKESRIV…
	316	UN000830	819	GTAATTGGAAAGGGCGGAGCCAATATCAAGAAAATACGCGATGAAACTCAAACAAAAATCGATTTGCCAGCGGAGGGGGATACGAACGAAGTGATTATGATCACAGGAAAGAAGGAAAATGTACTTGACGCCAAGGAACGAATTCAAAAGATTCAAAATGAGTTGTCCGACATCGTCACTGAAGAGGTGCAAATTGAGCCGAAATTCTACAACTCCATCATTGGCACCGGCGGTAAACTAATTTCAGCCATTATGGAAGAATGTGGCGGGGTTTCCATAAAGTTTCCCACTAGCGACTCGAAGAGCGATAAGGTGACAATTCGTGGTCCAAAAGACGATGTGGAAAAAGCCAAAGCTCAACTTCTCGAACTTGCCAACGAACGCCAACTGGCCTCATTT…	273	VIGKGGANIKKIRDETQTKIDLPAEGDTNEVIMITGKKENVLDAKERIQKIQNELSDIVTEEVQIEPKFYNSIIGTGGKLISAIMEECGGVSIKFPTSDSKSDKVTIRGPKDDVEKAKAQLLELANERQLASFTAEVRAKQQHHKFLIGKNGASIRKIRDATGARIIFPSNEDEDKEVIIIIGKEDSVKSAKEQLEAIIKDIDQVTEGEISVDPKYHKHFVAKRGEILHRISEENGGVMISFPRPGVDSDKVTLKGAKDCIEAAKQRIAEIVA
	317	UN000835	342	ATTCTGTTATCGGATCTCTTACAGAAATCTACAAAAGAAACCTTGCAGCCAGCCAAAGATTTCATACAGGAAAGGAGCCCCATAGGCGATGAAGACAACTCACAAAACAAGCAGGTGGCAATTGTCCAAATCGAAGAAGAGAAAACATGTGAAGAGGAAGATGAAGAAGAAGAAAAGGATGGACAAAGAAAGGAGGAATCAGGCTCTGATGCTCCAGTCATAGTGGAAGCTTCTAAAGATGCAGATCTCAAGCTGGTGCATAAGAAACCCCACAACATTCTTTCTGGGGTCGGATCAAAGGTCAAGCATTCCATTGCAAAGGTAAGAAAGGCGATTACTGGC	114	ILLSDLLQKSTKETLQPAKDFIQERSPIGDEDNSQNKQVAIVQIEEEKTCEEEDEEEEKDGQRKEESGSDAPVIVEASKDADLKLVHKKPHNILSGVGSKVKHSIAKVRKAITG
	318	UN000851	951	GCCACAGAGGAACATATTGGAAAATATAAGCTTATAAAAACAATCGGAAAGGGCAATTTCGCTAAAGTAAAATTAGCAAAGCATTTGCCTACTGGTAAAGAAGTGGCTATTAAGATCATTGATAAAACCCAATTAAATCCGGGGTCCCTGCAGAAGCTCTTTAGAGAAGTTAGAATTATGAAGATGCTTGATCATCCAAATATTGTGAAACTTTTTCAAGTTATCGAGACCGAAAAGACATTATATCTGGTTATGGAGTATGCGTCCGGTGGGGAGGTATTTGATTATCTTGTTTTGCATGGCCGAATGAAGGAGAAGGAAGCACGTGTTAAATTCCGACAAATCGTATCAGCTGTGCAGTATTGCCATCAAAAGAGAATTATACACAGGGATTTAAAA…	317	ATEEHIGKYKLIKTIGKGNFAKVKLAKHLPTGKEVAIKIIDKTQLNPGSLQKLFREVRIMKMLDHPNIVKLFQVIETEKTLYLVMEYASGGEVFDYLVLHGRMKEKEARVKFRQIVSAVQYCHQKRIIHRDLKAENLLLDSELNIKIADFGFSNEFTPGSKLDTFCGSPPYAAPELFQGKKYDGPEVDVWSLGVILYTLVSGSLPFDGSTLRELRERVLRGKYRIPFYMSTDCENLLRKFLVLNPAKRASLETIMSDKWMNMGFEDDELKPYIEPKQDLADPKRIEALVAMGYNRQEIEVSLSQVRYDDVFATYLLL
	319	UN000853	3018	ATGAGCAACGTCAAACTAGGTGTGGAGGTTGTCAGTGCTCACAACCTTATGCCCAAAGATGGCCAAGGCTCTTCCAATCCTTTTGTTGAGCTCCACTTTGATCAACAAAGGTTTCGCACCGCCACCAAAGAGAAAGATCTCAACCCTGTCTGGAATGAGAACTTCTACTTCAACATATCTAACCTAAACTCCATACCCCACCTGCATCTTGATGCCTATGTGTACAGTGAGATCAAAGCCACCCACTCTAAATCCTTCCTTGGAAAGGTTCGTCTAACTGGAACATCATTTGTCCCATATGTCGATGCAGTCGTCTTACACTACCCTTTAGAAAAGCGTGGCATCTTCTCACGTGTGAAAGGAGAACTAGGCCTCAAAGTGTTTCTAACTGATGACCCA…	1006	MSNVKLGVEVVSAHNLMPKDGQGSSNPFVELHFDQQRFRTATKEKDLNPVWNENFYFNISNLNSIPHLHLDAYVYSEIKATHSKSFLGKVRLTGTSFVPYVDAVVLHYPLEKRGIFSRVKGELGLKVFLTDDPTLKSSSNPLPAIDPLPRSGLLASLTQPQGHVSNPTPMTAAVSNDRAESRHAFYHLPNQNPQHSSTTMSQEPVKYAADEMRSEPAKIVRMYSASSQQPVDYTLKETSPYLGGGQVVGGRVIRSDKPSSTYDLVEQMQYLFVRVVKARELPTMDISGSLDPFVEVRVGNYRGTTRHFEKRQDPVWNEVFAFSRDRMQSSTLDVLVKDKDLVKDDFVGIVRFDLNEIPTRVPPDSPLAPEWYRLEDKKGEKAKGELMLAVWIGTQADGA…
	320	UN000855	6006	TCCAACTCCATCCGATCGAGGCTCGCGTCCCTGCTGCGGCCATGGACGCAAGGAGAACCAGACATCGAGCTCGAATTAGGGTTTACCAGATCACTCGCCCGAGCGAGGAACCTCGTCCTCAATGCCTCTGCTCTCGATCTTCTTCTTCTCGGCGGATTGAAGAATCGGATGTCTCTCAAAAGCGCTCGGGTTGGAGAGATCTGCCTTGTTATTTCTCCCTGGGGAGCTCCAGCTTTCCACTTTGAAGTCCATGGCGTTGATGTGATCTTCGCCGCGAGGGACTTGGAGGGGTGCTCGCATGGTTTGCAGGAATCTACAGATATGAAAAAGAAGGAGATGAATCAGATGCTTGCGTTACTTGATCCGGAGGGAATTTCTTTGCATGAAACCATTGGAAAT…	2002	SNSIRSRLASLLRPWTQGEPDIELELGFTRSLARARNLVLNASALDLLLLGGLKNRMSLKSARVGEICLVISPWGAPAFHFEVHGVDVIFAARDLEGCSHGLQESTDMKKKEMNQMLALLDPEGISLHETIGNISAITFSRNRLVTATTNIGLRHCWFKIYDIHLKLQLPVMDESIACFFRLKELHLESVLLDSSCLLKGLLGAFFMSQEKSSFVLNGSGLEIGLKGKDQVNCIASSADLLNRIRLRNLQLSDFDTHAPQIKFAFSLYDLPVLLMVFDVLSSKEVKGARNGRELWKIAARGVGCLIPHHRPPFCRIVSTVVLWLRHVRAYEKLLLLVGYSDERTFNQTAARMAHDKRFSSCVKHQWNVISDIEGELPVEAVARARQLARHTVALQFRRS…
	321	UN000859	873	AACATTTTCGATAGAAATGCAAAGCGTTTGCAAAAAGAACGTGCAGCGCGAAACCCCGACGTAGAGCTTTATGACTACCTGAAGGAAGAGGTTGGTTTCCGACTAGCGGATCGCATCATTGATATTAAGCGTGAATTCGCAAATGCCGCAGATATTGGCTGCAGTCGTGGATTTCTCTCCAAACACATTATGGCTGAGAGTGTACAGCATCTAACGCTGTGCGACACTAGCCCCACAATGCTAGCACAAGCACAGGGTACGCCGGGTTTGAAATTGACCAAGTTAGAGCTGGATGAGGAAAATTTGGATTTTCCTGAAAACTCGCTAGATTTGGTGATATCCAGTTTGAGTTTGCATTGGGTTAATGATTTACCGGGTTGCTTTTCAAAAGTAATGCGT…	291	NIFDRNAKRLQKERAARNPDVELYDYLKEEVGFRLADRIIDIKREFANAADIGCSRGFLSKHIMAESVQHLTLCDTSPTMLAQAQGTPGLKLTKLELDEENLDFPENSLDLVISSLSLHWVNDLPGCFSKVMRSLKPDGVFIASLFGGDTLYELRSSLQLAEIERKGGLAPHISPFTQIRDVGALLNRAGFTMLTIDTDEIVVGFPSMFELMWDLKGMAENNAAFNRPAHISRETMLAASAIYKELYAKDDGVSATFQIIYFVGWKPGPNQPKPLERGTGEVSLKDLGKII
	322	UN000863	543	GACGACATAAATGACGTCGCTGCCATGGGCGGTGTCAATTTAGCTGAGGAGTCACAACGCATTCTAGGCAGCACGGAAAATATTGGCACTCAGATACGTTCATGCAAGGACGAAGTATTTTTGCATTTGCCGGCACTACAAGCGCGCATACGTGCAATGGTAATGGAACGCGGTCTAGAAGAACCATCACAAGATGTGGCGGTTTTGATATCGCATGCGTGTCAGGAGCGGCTGAAAAATATCGTGCAGAAATTAGCGGTGATAGCAGAGCATCGAATCGATGTTATTAAGGTGGACCCACGATACGAAATCACAAAAGATGTGCGCGGCCAAATAAAATTTCTTGAAGAATTGGATAAAGCAGAGCAAAAACGTCATGAGGAATTAGAAAGAGAAATG…	181	DDINDVAAMGGVNLAEESQRILGSTENIGTQIRSCKDEVFLHLPALQARIRAMVMERGLEEPSQDVAVLISHACQERLKNIVQKLAVIAEHRIDVIKVDPRYEITKDVRGQIKFLEELDKAEQKRHEELEREMLLRAAKSRSKIEDPEQAKMKARAKEMQRAEMEELRQRDANMTALQAIG
	323	UN000865	4941	CCAGGAATGACACGCAGGTGATTTATGTTGATCCAACAACTGGATCACTATGTTACACTGGAAAGCTGGGGTATGACCTTTTTACTTCCGAAGAAGAAGCTTTGAACTTTGTCACGGATGGGTCAAGGTGGCTATGCAAGAGTACAACTTATGCAAGGGCAATATTGGGTTACTCAGCCTTGGGAAACTTAGGCTTGCTTTTAGTGGCAACCAAACTGAATGCCACCATTCCAAATTTACCTGGTGGTGGGTGTGTCTATACTGTTACCGAGAGTCAGTGGATTAAGATTCAACTTCAAAATCCTCAACCTCAAGGTAAAGGTGAATTGAAGAATATTCAGGAGTTGATTGAGCTTGACATTGATGGGAAGCATTATTTCTGCGAAACAAGAGACATAA…	1647	PGMTRR*FMLIQQLDHYVTLESWGMTFLLPKKKL*TLSRMGQGGYARVQLMQGQYWVTQPWET*ACF*WQPN*MPPFQIYLVVGVSILLPRVSGLRFNFKILNLKVKVN*RIFRS*LSLTLMGSIISAKQET*LDLSQVVCSCIIQTMSLFGMGGFQSLSKRLGCHNIASSCCRGLQSHEALVVQVSMKEPFLSQHVVADCILVLVTWLEG*MLVLAQEMK*SVSNLYGFLGRLAIPYVSVHTSGEEALYLSGGGQS*S*LLQKLKFMFQIESLTKEAWNTIRD*VGDMVLKI*TQLLEQAKRKIA*FLLHVLIYLEMVKENQNPY*SSILRSP*II*DQLVSFHILEFI**IMTGMPA*SLKASSSQLRGSGNFSKHPQ*LLVFLKGIICLILSILRI…
	324	UN000867	1125	TTAACACTTGTCGCTCGGGATGGAATGAACATGGTCGTTTCAAATTTAACGATGCTTGTGGCTGAAAAATATGGCAAATTAACGGAAATAGCACGCCGCCAACTCATATGGCTACTTCGCGAACTTGTCAAACATCAAGTGCTTTTAGTAGAAAATATTGTGTGGAATTGCCTTAGGCAAGCAGGTGGTGGTGACGTTTCAATCAAAAACATTTTTCTAGTTGAGGGTCTGCTCGATATATTCATCGAGTATCGGGCTTGGCTAGAATCACAGGCTTTTCTTGTACAAACAATAGTTTACAGCTACGTTCGGCTTATAGAAGACCATGCGAATCCCTCATTAACTGTGCTTCGACAAAAAGAAGTGAAGTTTATAATATCGTTAATTCGTGATCGGTTC…	375	LTLVARDGMNMVVSNLTMLVAEKYGKLTEIARRQLIWLLRELVKHQVLLVENIVWNCLRQAGGGDVSIKNIFLVEGLLDIFIEYRAWLESQAFLVQTIVYSYVRLIEDHANPSLTVLRQKEVKFIISLIRDRFLDIIPLGRDFVRLLQNVARVPEFEQLWRDILHNPESLHPTFTGIWQLLQTRTSRRFLQSRLTPDIERKLTFLASTVKFGNQKRYQDWFQDKYFATPESHSLRSDLIRFIINVIHPTNDMLCSDIIPRWAIIGWLISSCTNPIALANAKLSLFYDWLFFDPIKDNIMNIEPGILVMYHSIRNHPFVSSTLLDFLCRIMKNFDIRHEDKIRTGVYNSLNKILEKQVIPNLQPLFESPKLDRELR
	325	UN000868	1452	GGAAAACGGGTATCAAAAGACTTCGATATAAGAAAGGAGGCCGGTGGGTTCTCTTTCAGAGCTGTTCCAAAGGAGTTCAGGGTTATGGTATCTGAAAACTTCCTTGAAATCCATCTCTTTTGGGCTGGGAAGGGGACTTGTTGTATCCCCTTTCAAGGTACTTATGGACCAACCATTTCAGCAGTTAGTGCGATAGCAGATTTCACATCAAATGTTAATAATGGTCCAACAACCGCTTCATCGAGGACTGGCTTGATTGTCGGGCTTGTTGTTGGTGTCGCTGTGAGCTTCATATTACTTTTTTCAGTTTTAATTTTCAGGAAGAAAAGGTTAGGCATCGACAAAGATGAAGAGCTTCCAGAAATGGGTCCCAACACTTTTAGTTATAAAGAACTAAGG…	484	GKRVSKDFDIRKEAGGFSFRAVPKEFRVMVSENFLEIHLFWAGKGTCCIPFQGTYGPTISAVSAIADFTSNVNNGPTTASSRTGLIVGLVVGVAVSFILLFSVLIFRKKRLGIDKDEELPEMGPNTFSYKELRTATEDFNPSNKLGQGGFGVVYKGTLSDGRVVAVKQLLVTSHQGNSQFETEIATISAVQHRNLVQLYGCCIEDDKRLLVFEYLENNNLEQALFGKSSLYLNWSTRYDICLGTARGLAYLHEESRLRIIHRDVKASNILLDAALNPRISDFGLAKLYDDNKTHISTRVAGTIGYLAPEYAMRGHLTEKADVFAFGVVTLEILSGTSNSILNVDPEKMYLLEWAWHLYENNCALELVDPALSNFNEGQATRMIGVALLCIQASPMLRPP…
	326	UN000869	5337	CTCACCAACACCACGCACACGGAGGTCGCTCCTTGCTTGCCTCTGCTCTCGCTTCCCGTCTTCTGCGGCGCCGCTGATCCCGAGCTCCGGCTGCTTGATGAGCAGAGCGGCCGGCGTCATTCGTCGCTTAATCGGCCTGATATTCTCGCGCAGGCGAGTAAGATCGCGGATCTGCTTAGAGACACTGATGTCGGTTACTTGAATCTCAGGGATGATGTCAATCTTACTCCTAATACCTGGTTTGCTCCTCTGGACTTGTATAATGAAGTTCTTCGATGTAATCCTGAAGCCTTTGGATGCTCCATTCCAGGTCTTATCAAGGAGGAGAACTATCATGATTCTTCATCTGGAACACCGTCCCTTATACAAAATGCTCCAAAAAATGTTCCTGCACAAAAA…	1779	LTNTTHTEVAPCLPLLSLPVFCGAADPELRLLDEQSGRRHSSLNRPDILAQASKIADLLRDTDVGYLNLRDDVNLTPNTWFAPLDLYNEVLRCNPEAFGCSIPGLIKEENYHDSSSGTPSLIQNAPKNVPAQKDYEGGFLDHPDGSLINITPLVHSSKPKTKKKGKDGISSNGPDDVELQDGIIGRFCEMLEDFCGREEISNDDMGEAEGPSMPLTDIKFLLNEIMSIRAKKILHLVPVDTLVRLLNVLDRQIQHGQGLSIDENEDSDPDVVSLVNCALESTHAVLAIMTHHNMPKQIYKEEIIERIVDFSRHQIMECMLACDPSYRALHRPRENGVLDGDEDDDPDADVGSVTKKRRGYRSVKVKKSTGNKVSAVVHAVLQKLCSLLSFFKDLLSIER…
	327	UN000870	1674	GATGCTGTTGATGTTCAGCAACATGCACCTACCGTTCCACCAGCTGTCACGTTAAGAAGGTCTACCAGAGACCGCCATCCATCCACTAGATACTCTCCTAATGAGTATGTGCTACTGACTGATGCTGGTGAACCTGAAAGGTTTGAAGAAGCAATGGAGGATGTAAACAAGAATCAATGGGTTGATGCAATGGAAGATGAGCTAAAGTCATTGCATGACAATCACACTTTTGAGTTAGTGACATTGCCTAAGGGTAAGAAAGCTTTGAAGAATCGATGGGTTTATAGATTGAAGCATGATGAGAATACTTCACTTCCTCGATACAAAGCTAGATTGGTTGTTAAGGGTTTTAGTCAGAGAAAGGGAATTGACTATGATGACATCTTCTCACCCGTTGTG…	558	DAVDVQQHAPTVPPAVTLRRSTRDRHPSTRYSPNEYVLLTDAGEPERFEEAMEDVNKNQWVDAMEDELKSLHDNHTFELVTLPKGKKALKNRWVYRLKHDENTSLPRYKARLVVKGFSQRKGIDYDDIFSPVVKMSSIRVVLGLAASLDLEVEQMDVKTAFLHGDFEEDIYMEQPEGFKVEGKENYVCKLKKSLYGLKQAPRQWYRKFESFMGEQAYKKTTYDHCVFMKKFSEDDFIILLLYVDDMLIVGQNASRIEKLKQDLSKSFSMKDLEPAKQILGMKISRDRKAKRLWLSQEKYIEKVLQRFNMDKAKVVSTPLATHFKLTKKQRPSSKKEKEDMKRVPYASAVGSLMYAMVCTRPDIAHAVGVVSRFTSNPGREHWNAVKWILRYLRGTSSVK…
	328	UN000872	2475	GTCTATGAGTCAGAAGGAATACTAACAGCAACGACAACTAAGTCAACTGTTGAAGAGAATTCAACAGATATACGTCCAGCATCCATAGACTTCAAAGCCATCCAGGAATGTGTGCCAAGTGAAGTTATATCACAAGATGCAACCCAGTTGGCATCATTCAAGAAGTTGGATCAAACTAGCCTTGTTGCGGATGAAGTTGTTGACGAAAAAGATGGAAAACTAACTTTGACTGTATCGAATTCCATTCACCTGGATAAGGATGAGACAGTCGATGCAATCTCTACACAATTGTGTTCTTCAATTCAGGAGACTTGTGTGTCTCATGCATCGAATGGTTCCATTCCTATTTCGGAGTCCAGGCAGCCCACTGTTTGTAATTCTGCAGCAGAAATTGTAGCA…	825	VYESEGILTATTTKSTVEENSTDIRPASIDFKAIQECVPSEVISQDATQLASFKKLDQTSLVADEVVDEKDGKLTLTVSNSIHLDKDETVDAISTQLCSSIQETCVSHASNGSIPISESRQPTVCNSAAEIVAEKTSHSTAAGNSLDISKASICIKAAREFGKELKPQPDACSSMTNQSSPEVSGVSFDKCAAALVVTTETLPSSLDESSDDIVPNNDQLREANLVSGDDSSAHISFASRGGLRNICKESSLAPITLSDNIAEPHTHTDECGNPNSSEPNCGSPTVITCSEPSQTEKKDHGCIEKGSLDQNIPISDDVHQVESKVNSFNFPAQAPKGKAASGEDRSFTFKVGSPDVLPERESGKGWKKFSNIQDIELPQTAKESPTVPGPCQTDPEIFG…
	329	UN000874	180	AACGAAGATTGGTGTGCCGTTTGCCTTGACGGTGGAGAGCTCATGTGCTGCGACAAGTGCCCGAAGGTGTTTCATCAGAATTGTCATATACCTGCCATCAGTTCATTGCCAGACGAGAGCGAAAGTTGGCAGTGCCTATTATGCGTGAATCTCAAAGAGCTGGCTAACAATGCGGATAAC	60	NEDWCAVCLDGGELMCCDKCPKVFHQNCHIPAISSLPDESESWQCLLCVNLKELANNADN
	330	UN000875	5526	ATGGACCCATATTCTCATCTTTTGGAGAGAATCCGAGTCCCTCAACCCTCGATCCAACGGTTCGCAGTAATCTCCATCTTTGAAAAGCTCAAATCCAACGGCCCTGAATCTGATGCCGCGAAAGGTGCCATTTCTCACTGTCTCTGTTCGAGCTTCTCTGCAGTCATCGACCAGTCTGTTCGAGAGCTCTGTCGCACTGCAAAAGAAGGGAAGATCAGGGTTTCTCATGCACTCTTGGAGCTGCAAGCAGCTCTTGAGGGCGGTGAGGATTCACGTTTCATCGATATTTTTGTGAAAGGAATCAGTTTTCTCTGTCAATTAGGGTTCCAGAATAATACTTCGTGGCAGTTTGAATCGGCTGAGGCTCATCCCTTTGTTAAGGTCCTTTCTACTCAAACT…	1842	MDPYSHLLERIRVPQPSIQRFAVISIFEKLKSNGPESDAAKGAISHCLCSSFSAVIDQSVRELCRTAKEGKIRVSHALLELQAALEGGEDSRFIDIFVKGISFLCQLGFQNNTSWQFESAEAHPFVKVLSTQTEAQGELLHQTLLFIVQNKTIGFTRTLKFLQPFLTFSVLKIPYSVSSSAFARQLISSLATLSCSFPSEAVPIIKVALGYLKFFPHRNVEELKHLVYCFEHLVDAFVVIFKQLVSTGLPANELQVCSVELLDTVLSLCTDLQKRCTRNGQIIELSKRLLFVQKELGLQYIPDFISVVASLFIILIQAEFEHEQLSILKLSLFLLKWKNENEYVIGRASCSFNEELVFVFPIINLLASPSKSVKAAAIDFLSLLERLFATISAAPKKVT…
	331	UN000876	1827	CCCCGTTTGATTATCAAAAAAATTGAAAACAAAAATTTCAAAAGCTACGCTGGTAAGTAGTACNTGGGCCCTTTCCATCATTGTTTTACGGCTATTATTGGACCAAACGGTAGTGGCAAGAGCAATGTCATCGATTCCATGTTGTTTGTGTTTGGCTATCGAGCCAATAAAATTCGTTGCAAAAAAATATCGACATTGCTGCATAATTCCGCTAGATATCCCAATATGTCAAGTGTTCGGTGGCGGTGCATTTCCGGCAAATATTGGATAAGGAAGATGGCACGTGCGAGGAAATCCCAGACAGTGATATTGTAGTTGAACGCACAGCATTTCGCGATAATTCCTCTTATTATACGATTAATGGACGNGCGGGTAAGTTTAGAGAAGTAGCAAAACTGT…	609	PRLIIKKIENKNFKSYAGK*YXGPFHHCFTAIIGPNGSGKSNVIDSMLFVFGYRANKIRCKKISTLLHNSARYPNMSSVRWRCISGKYWIRKMARARKSQTVIL*LNAQHFAIIPLIIRLMDXRVSLEK*QNC*RSTTSIWITIVF*YCREKWSRLR**SRRDYLKTNAACSNIWKISLVQHAIRNRLSK*MSVWSI*RRSAQXKHNR*SWPNVK*KI*NSLIMKQSIICGARTXNTRTKNLRIQKYLSEKNKKLEEYXERARHNNGELKEHDDAAEKLKQEREEKEXXXIREEMAQFDALRKKKESIEKQWESAHKNFTEVQQTMDMTNKRRKQHKTQMEKLKDELVXST*STLVKTKKKLQNAXXKKVEKLNKDKSTMEEEXAKELCELEKTTKPLI…
	332	UN000877	4059	CCGGAAAGTTCGGCTAGTTTCTTATCCCGTATTACATATACTTGGTTCGATGGTATGGCATGGAAAGGTTACCGCAAACCTTTGGAAGAGGAAGATCTGTGGGACTTGCGGCCACAGGACAGCTGTAAGGAAGTCATGCCAATATTTGCTTACTATTGGAATAAAAACGTGCGCAAGAATTCTAAAAGTCAAACGCCACCACAACCAAAAGCGCAGTACAGTAATGGCAAGGTGGAATTTGAAAACCCACATGGACATACGAGCGGTAAAAAAGGTGTGACGTCAATCATGCCACCAATTATTAAATCATTTGGTGGAGTATTTTTGCTCGGCTCGCTGATGAAATTGATTTGTGATATACTAACGTTTGCACAACCTCAAGTGCTGAGTTTGGTCATT…	1353	PESSASFLSRITYTWFDGMAWKGYRKPLEEEDLWDLRPQDSCKEVMPIFAYYWNKNVRKNSKSQTPPQPKAQYSNGKVEFENPHGHTSGKKGVTSIMPPIIKSFGGVFLLGSLMKLICDILTFAQPQVLSLVIGFVEDFSDDEKERQPEWKGILYSALLFITAAAQTFMLGQYFHRMFVVGLRIRTALINAIYRKALVISNATRKESTVGEIVNLMAVDAQRFMDLTTYLNMIWSAPLQIALAMYFLWLQLGPSVLAGLTVMIILIPLNGVIANRIKVYQIRQMKYKDERVKLMNEVLSGIKVLKLYAWEPSFENQVLRIREKEIATLKATAYLNASTSFLWSCAPFLVSLVTFATYVLVDENNVLDATKIFVSLSLFNILRFPLIMLPMLITNMVQTQ…
	333	UN000879	4920	CCAGGAATGACACGCAGGTGATTTATGTTGATCCAACAACTGGATCACTATGTTACACTGGAAAGCTGGGGTATGACCTTTTTACTTCCGAAGAAGAAGCTTTGAACTTTGTCACGGATGGGTCAAGGTGGCTATGCAAGAGTACAACTTATGCAAGGGCAATATTGGGTTACTCAGCCTTGGGAAACTTAGGCTTGCTTTTAGTGGCAACCAAACTGAATGCCACCATTCCAAATTTACCTGGTGGTGGGTGTGTCTATACTGTTACCGAGAGTCAGTGGATTAAGATTCAACTTCAAAATCCTCAACCTCAAGGTAAAGGTGAATTGAAGAATATTCAGGAGTTGATTGAGCTTGACATTGATGGGAAGCATTATTTCTGCGAAACAAGAGACATAA…	1640	PGMTRR*FMLIQQLDHYVTLESWGMTFLLPKKKL*TLSRMGQGGYARVQLMQGQYWVTQPWET*ACF*WQPN*MPPFQIYLVVGVSILLPRVSGLRFNFKILNLKVKVN*RIFRS*LSLTLMGSIISAKQET*LDLSQVVCSCIIQTMSLFGMGGFQSLSKRLGCHNIASSCCRGLQSHEALVVQVSMKEPFLSQHVVADCILVLVTWLEG*MLVLAQEMK*SVSNLYGFLGRLAIPYVSVHTSGEEALYLSGGGQS*S*LLQKLKFMFQIESLTKEAWNTIRD*VGDMVLKI*TQLLEQAKRKIA*FLLHVLIYLEMVKENQNPY*SSILRSP*II*DQLVSFHILEFI**IMTGMPA*SLKASSSQLRGSGNFSKHPQ*LLVFLKGIICLILSILRI…
	334	UN000884	5646	ATGGTTTCGCCAAAGCTCCTCCTCTCCACCATCGAATCCGCACTGCTGGGTCCTTCTCCTCCAACACCATACCAGAGGATCGAGCTCATGCACGCCATTCGATCCTCTCTCCCCTTGTTCCGATCTCTTCTATCCTATACCCCACCCAAAGCTTCAGATCGCTCCCAAGTCCAGTCGAAAGAGGTCAGACTGCCAGATTCTCGCCCCATCTCTCTCAATGACCAGGACGTTCAGATTGCTTTGAAATTGAGTGATGATCTCAATCTCAATGAAATTGATTGCATTGGTTTGCTTGTTTCTGCCAATCAAGAGTGGGGTTTAGTGGGTCGGGAACCATTGGAGATTTTGCGTCTTGCAGCTGGTTTATGGTACACCGAGAGAAGAGATTTAATAACTGCC…	1882	MVSPKLLLSTIESALLGPSPPTPYQRIELMHAIRSSLPLFRSLLSYTPPKASDRSQVQSKEVRLPDSRPISLNDQDVQIALKLSDDLNLNEIDCIGLLVSANQEWGLVGREPLEILRLAAGLWYTERRDLITALYTLCRAIVLDQGLEADLVADIQKHLEDLFDSGLRQRLITLIKELNREEPAGFGGPQAECYVLDSRGALVERRDVVCRERVSLGHCLVLSVLITRMSPTDVKDVFFALRDLAAELNGSVATLKLQIVFSLLFSLVIAFMSDALNAVSDKASVLSRDTSFRREFQERALSTVNDPTIEGFVDCVRFAWTVHLMLTQDGSTARETISGASSSDLANIYSCLELISANNVFQFLLDKVLRTAAYQNDDEDMIYMYNAYMHKLMTCFLSH…
	335	UN000887	939	ATGGCTGCCTTGAGGGTGGTGAACTATGTAAACATGGAATTAGCTCTATTGCAGTGTTCTGCTTGTAGTTCGTTTTCAATGTATCCAAGGAATGATATTGTGGTTCGAACTTCTCATTTCTTTCCTACATCAGCAAGGGAATTGCCATTTGCTAAAACTGAAATAATATGGACACTAAATATAATTGCAAGAGCTCATCTGTCAATAGCACTGAACACAGGTTTTCTTCTTGTGTTCTTCAGATATGTTCCATCTGCGCAGGAGTGCCCTCTACTCCTACGGCTTCCTAGTGGAGAGATCTCAGCAACTAATGCATTTATATCTCCTATGTGGGGAGGTGTTATTGTTTGGAATCCACAAAGTTGCTCAAGGGATTTTCATGGTGCAGGTCCTGCTAAG…	313	MAALRVVNYVNMELALLQCSACSSFSMYPRNDIVVRTSHFFPTSARELPFAKTEIIWTLNIIARAHLSIALNTGFLLVFFRYVPSAQECPLLLRLPSGEISATNAFISPMWGGVIVWNPQSCSRDFHGAGPAKHTISDQDLQRIFKIFMGQLRLLFGLKSDNLDGADSGISSFLASERGFAEWELDVLFRHHTCFNLNSCATTLGSLSRLVQSLPRMIVMEEIGKQVKLSLEAATLAQNNASRGVYDASAVSSREAMALAEDAFFHPSIMSLSYFSIEHYLAIYMPFFAPVALHVLLAVIKELRRYKQERAKY
	336	UN000890	1668	TTGCGAATCGTAGACAATCATTTTTGTCCACCTTCCGATAAACATGATCTACTTAAAGCTCCGGAAGATTTTCCTATACCTGTTTCACGCTACACACTTTGCGAAATGACATTCACTTGGCATATGTATGGTGGCAAGGATTTTGCATCCACTCAAGAGGATGATTGTTCAAAAAGTGAAGTAAGTCACTTGCGCATGTCTGATGCCTATAAGTACGGCGTCTCATATTCAAAAGGAGATAAATTTGTTCGTGGGGGGAAAAAACCGAAAGATATCTCATGGAAATCAGTTGGCGGGATTCAGCGCAACCATGAAGTCATTGTCGAGATTCAACTTACAAAAGTTCGTCTTTCACACGAAATCTACCCAAGCTATACATCCCAAGCTTCGCGACAAGTT…	556	LRIVDNHFCPPSDKHDLLKAPEDFPIPVSRYTLCEMTFTWHMYGGKDFASTQEDDCSKSEVSHLRMSDAYKYGVSYSKGDKFVRGGKKPKDISWKSVGGIQRNHEVIVEIQLTKVRLSHEIYPSYTSQASRQVLVIHDIEIRDRLQSSEINKFLYHPHTKTSSHKTPQQMVVVKALHVRPNPKLSAAEECSLRISLLPMRLHIDQDTLIFLADFFTNMGSDMKETQYTDNNSPSEIQEPIMDVEVPEMDDEVQARKLISTNLDLLENEVAGKSLDPTEAKDKSAPIYFREVVFGPDVPIRFDYHGRRVELSRGPITGLLMGLGQLQCSEIRLKKIIHRRGFLGIEKLITYLCKEWLKDIKRNQLPKILKGVGPTYTFVQFIQGVIDLFRLPIEQYQRDG…
	337	UN000894	2445	GTCTATGAGTCAGAAGGAATACTAACAGCAACGACAACTAAGTCAACTGTTGAAGAGAATTCAACAGATATACGTCCAGCATCCATAGACTTCAAAGCCATCCAGGAATGTGTGCCAAGTGAAGTTATATCACAAGATGCAACCCAGTTGGCATCATTCAAGAAGTTGGATCAAACTAGCCTTGTTGCGGATGAAGTTGTTGACGAAAAAGATGGAAAACTAACTTTGACTGTATCGAATTCCATTCACCTGGATAAGGATGAGACAGTCGATGCAATCTCTACACAATTGTGTTCTTCAATTCAGGAGACTTGTGTGTCTCATGCATCGAATGGTTCCATTCCTATTTCGGAGTCCAGGCAGCCCACTGTTTGTAATTCTGCAGCAGAAATTGTAGCA…	815	VYESEGILTATTTKSTVEENSTDIRPASIDFKAIQECVPSEVISQDATQLASFKKLDQTSLVADEVVDEKDGKLTLTVSNSIHLDKDETVDAISTQLCSSIQETCVSHASNGSIPISESRQPTVCNSAAEIVAEKTSHSTAAGNSLDISKASICIKAAREFGKELKPQPDACSSMTNQSSPEVSGVSFDKCAAALVVTTETLPSSLDESSDDIVPNNDQLREANLVSGDDSSAHISFASRGGLRNICKESSLAPITLSDNIAEPHTHTDECGNPNSSEPNCGSPTVITCSEPSQTEKKDHGCIEKGSLDQNIPISDDVHQVESKVNSFNFPAQAPKGKAASGEDRSFTFKVGSPDVLPERESGKGWKKFSNIQDIELPQTAKESPTVPGPCQTDPEIFP…
	338	UN000897	213	CGCACCAAGACAACGTCGCCACAAGTTCACAGCTCAACCGACCTATCCAATACTCAAGAAGACGACCCGAACGAAGATTGGTGTGCCGTTTGCCTTGACGGTGGAGAGCTCATGTGCTGCGACAAGTGCCCGAAGGTGTTTCATCAGAATTGTCATATACCTGCCATCAGTTCATTGCCAGACGAGAGCGAAAGTTGGCAGTGCCTATTATGC	71	RTKTTSPQVHSSTDLSNTQEDDPNEDWCAVCLDGGELMCCDKCPKVFHQNCHIPAISSLPDESESWQCLLC
	339	UN000898	1677	CACATTAAAATTGAATTTCTTGATCTCCCTACTTCTTCCTCCGGTATAAATACAGGAGTTTATGGGCCTTTTGACTACAGAATAAGGAGAAACCTTTGGGACTATCTTGTTAACACCTCTTCTACAGCTTTACCCTGGTTTGTGATCGGAGATTTCAACTCCATCCTATTGGCCTCTAAGGAATTTATCCTTCGCCCTCCTTCTCCCATATTTGTCAAGGATTTCAATGATATGGTTCTGGCTTCTGGTCTCTTAAGGATCTAGGCCTCGAGGAAATTGCTTGACTTAGGCCAATAATAAGCAAGGTCAAGCATATGTTGCTGCCACACTTGAGCCTTCACCAATGCTACTTGGTTGGATAATTTTGAGGATCCTATGGTTACTCATCTTCCTAGGCTC…	559	HIKIEFLDLPTSSSGINTGVYGPFDYRIRRNLWDYLVNTSSTALPWFVIGDFNSILLASKEFILRPPSPIFVKDFNDMVLASGLLRI*ASRKLLDLGQ**ARSSICCCHT*AFTNATWLDNFEDPMVTHLPRLSSDHSPLLLTYRYRFSLKNIPSKFDEM*LTHSSFSAVVENS*SISCSGNPEIILAQKLKILKRNLNVWIFEVFRQLKRKIAEADKSVLDAQIAYDSNPSDSLLLPLNLSKSALQNCLNSTKGQNQMAPRWR*GYNSSPPSQVQQHLQLY*QDFCGGDLFKD*EQIRDQACIYFSQLLQSSTSTPDEVLFYMAGPSVTVHQNNSLMAIPSSEIREALFGLKRNSSPGPDGFSGVFFTNCWHNVCRDVIQAVSHLFSITRLLRATNAY…
	340	UN000908	5004	GCTTCGATCAGCCGTGGCGAAGGAAGGTATGGAAGGTGCAACATCAACAGGGCCGAAAACAAAGCCGCTGCCTTGGCGGCGCCTGAACATCATCGGCGCTATCACCATTCATGGGATGCTGGTGCGAATGATGTGGCTGCGAGCTTGAACTCGACGACGAGCGGGAAGAGGTCAGTTGATGATCTGATTGTTACAAACACATATCATGCTAGTTTTGATGTTGGAAAATCGCCATTAGACGAAACCCAATTGAAAGATCAGCATGATAAGTTGGGTGGTGTGGATGGCTTGGGCACAGGCCAGATTTGTGATAAAGACCACTCCTTGGAATCAATTACATGGAAGACGGTCAAGTGGACGCGGTCCAGCAGTAGTTTGTCTGCGAAGAGTCTCAAATCC…	1668	ASISRGEGRYGRCNINRAENKAAALAAPEHHRRYHHSWDAGANDVAASLNSTTSGKRSVDDLIVTNTYHASFDVGKSPLDETQLKDQHDKLGGVDGLGTGQICDKDHSLESITWKTVKWTRSSSSLSAKSLKSDLDDAQLESQDGKEPLLRPPSEDPVEGVTATALVAEGSCPRKRQRLGWGQGLAKYEKQKVEGPEETTGKSGSVHWDCNVKDIHNTSTQSLPDVSPRVGSVLVCTSPATLCSVACSSSSGLGDKRHLKVTNSDNGTSHLSNLLGQGFQKCPEELSANLEQLELNAINNLSSLLANLLPSLDASSGDSDSVQSTALDKLFSLRDDISKSLEKTELEIDLFENELKSIDFNCETHVPCPTPSELGETIAVLKPCQAQADPVPKLSVREQ…
	341	UN000911	168	GATCTGGTGAACATATTTGAAGTATTTCTTCCTCAGTTGTTACTCTACCCAAATCCGTCGGACCCATTAAATGGGGAAGCTGCTTCTCTTATGATGAAAGATCGAGAATCTTATGAGCAGAAGGTCAAAGAGCACAGTGCAAAATTTGCGAAGGCAAAAGACGGTGGA	56	DLVNIFEVFLPQLLLYPNPSDPLNGEAASLMMKDRESYEQKVKEHSAKFAKAKDGG
	342	UN000919	531	ATGACCATTATACTATTTTTGGTTGACACGTCCGCGTCGATGTGCCAGAAAGCGTACGTAAATGGCGTACAAAAGTCGTATCTGGACATAGCGAAGGGCGCTGTGGAAACATTTCTAAAATATCGTCAACGCACACAGGATTGTCTTGGGGATCGCTATATGTTGTTAACTTTTGAGGAGCCCCCCTCCAATGTCAAGGCCGGGTGGAAGGAGAATCACGCAACATTTATGAATGAACTTAAAAATCTGCAAAGTAATGGACTAACTTCAATGGGTGAATCGCTAAAGAATGCCTTCGATTTACTAAATCTGAATCGCATGCAATCCGGTATCGACACTTACGGTCAAGGTCGATGTCCCTTCTATTTGGAACCGTCTGTAATAATTGTGATCACTGAT…	177	MTIILFLVDTSASMCQKAYVNGVQKSYLDIAKGAVETFLKYRQRTQDCLGDRYMLLTFEEPPSNVKAGWKENHATFMNELKNLQSNGLTSMGESLKNAFDLLNLNRMQSGIDTYGQGRCPFYLEPSVIIVITDGGRYSYRNGVHQEIILPLNTQIPGTNFTKEPFRWDQRLFSLVLR
	343	UN000921	2403	GCCTTGCTAGAAACGCTATATCAAGGTCGCGTACCCGATGGATTTTTGTATGATTTGGTGGCTACTGCGTATAATCAACACGAAGATTTTCAACAAATATTCACTCAAGTTTTGCGCGGGCTCTTCATTGGAATGCAACGCAACATTTGCACAGCCAACATCAATACCCAACAAATCGATTTGTTAGCTAAATTGGTAACCATTAAAGTGGGTTCGGCGCGCCCGATTTGTGATTTGATTGCATCACAAGTGAATTTCCTTCCCGAAATTTGTACGAAGATACCCGGCCGAGAAATAGTGAAATGCAGTTATCTAGGCCCGTTTCTATCCGTCTCGTTGTTCGCCGAGGAAAACGTGAAATTTGCCGAGGCGCAAAGCAAGAGTAATCTTATTGTATAC…	801	ALLETLYQGRVPDGFLYDLVATAYNQHEDFQQIFTQVLRGLFIGMQRNICTANINTQQIDLLAKLVTIKVGSARPICDLIASQVNFLPEICTKIPGREIVKCSYLGPFLSVSLFAEENVKFAEAQSKSNLIVYNMYHFRWEMQSMRTSMHTVFHSLLVNVNSRPKTLEYISKILSYNERRAQFACDEKLLARDGFVINLMSVLQQLSVKIKLDRIDPSFPFYKDSLISIENDTKLRFTDTEYKRFIESNFSTVTHNANFQTQCWFLTLQAHHLGFMPAIQRYRQKARAIKELQKLIDEIDRTKSHWENTPYAKRNKQFRERWHKQLKKLTRSKMCSELCLLDSKLLTSCMFFYSTVCEYLLYQIEGRAIEGPFIANVPVNQLTPTDAFSALPEWYVDDI…
	344	UN000923	5481	ATGCCGATCGGATCTCGCCATCTCACAGTTTTGGGAGAGTTCAAGCCCTTTGGTCTGATCGCAGAAGCTCTCGATGGCGGAAAACCCCCCGAAAATGCCCACGATAACTACCACTATTTCCTCTTCGACCCAGACATCACCCGCGAGAGAGATGATTCACCACCAGAAAATGATTTATCGCCATCCGATTCATGCCGCCACGGAGGCGGCGGTGATAACGAGTTCTTCATCAGAGGAAACCGGATGACATGGAGCACGGGATCGCGGGTACACAGAAGATACACCTCATGCAGTTCAATTGTCATGGCTTGTTGGTGCCGCATGGAGGCTATATCAGAACCTCTTCTTTGTGTTCTACAAATTGACATGCTGACGATCTACAATACCTCCGGTGAAATC…	1827	MPIGSRHLTVLGEFKPFGLIAEALDGGKPPENAHDNYHYFLFDPDITRERDDSPPENDLSPSDSCRHGGGGDNEFFIRGNRMTWSTGSRVHRRYTSCSSIVMACWCRMEAISEPLLCVLQIDMLTIYNTSGEISCIPLPYAIASIWPLPFGLLLQRATEGSRPPYLSFPSSSPLLNARDLSRPNRECGSNPQCNTNMLNASGHNFMGNVSATSSHLILKHPLEEPQALFVQEKGRLSTMKDYDERTIWTSDIIPLVASYHKGKMQHSVWLVEIINSNFDTASSSKTADALAAGVLSKDFLLRKIWQGKCPQSAASKVFLATDDDGVPIICFLLQDQKVLLSIRLQTDESNNDILLDIKPHMSWSIPAIAAASVIVTRPRMKTGVLPFSDIVVLAMENNL…
	345	UN000929	4884	ATGGGTTTTAAGCCACTAGTTTGGTACTGTCGGCCTGTGGAGAATGGTTTCTGGGCAAAGGGTGTTGAGAATGCCTTTGGTGTTTACACACCATGTGGGATTGACACTTTGGTTGTCTGCGTATCTCATTTGGTGCTTATGGGGTTGTGCTGTTATCGAATTTGGAGGACAAGGAAGGACTTAACCGTAAAGCGATTCTGTTTAAAGTCACCTTATTACAATTATATGTTGGGGCTATTGGCTGCTTACTGCACAGCAGAGCCTCTGTTTAGGCTGGTCATGGGTATGTCGACCACGAATGTGGATGGACAAACTGGACTTGCTCCCTTTGAGATAGTTTCTCTAATCATTGAGGCTCTTGCTTGGTGCTTTATGCTCCTCATGATTGGTGTAGAGACC…	1628	MGFKPLVWYCRPVENGFWAKGVENAFGVYTPCGIDTLVVCVSHLVLMGLCCYRIWRTRKDLTVKRFCLKSPYYNYMLGLLAAYCTAEPLFRLVMGMSTTNVDGQTGLAPFEIVSLIIEALAWCFMLLMIGVETKVYICEFRWYVRFGVIYILVGEAVMINLVISVKDYLNQSVLYLYMSEIACQAIFGILLLVYVPGLDPYPGYIPMGNEVTIDESEYEQLPGGEQVCPERHVSIFSKILFGWMTPLMQQGYKRPITEKDVWKLDSWDRTETLNSRFQECWLKESRKPKPWLLRALNSSLGGRFWLGGLFKIGNDASQFVGPVVLNLLLQSMQRGDPSWIGYIYAFSIFAGVALGVLCEGQYFQNVMRVGFRLRSTLVAAVFRKSLRLTHEGRKKFQSG…
	346	UN000930	3624	CTCTGCTCGGAAGCCGTCGTCGGGAAGAGAGTTAGGGTTTTCTGGCCCTTGGACAAGACCTGGTACGAAGGCTCCGTGAAATCATTCGATAAACAGTCCAGCAAGCATGTTGTTCAGTATGATGACGCTGAAGAAGAGGTTTTGGATCTTAGAAAGGAGAAGATTGAGTGGGTGGAGGATCAGGTGAGAAGCTTCCGACGCCTGCGCCGGAAGTCGGTGCCGGAGGAGGTGGANGGTTGAGGAAAAGGTGTAGATGATGGAAGTGGTGGGGATGATGACTCGACGGATGAGGATTGGGGGAAGAGCGCAGGGAAGGAGACGGGTGATGTTGATAGCGATGGCGATGATGATTCGGAAGAGTTGGAATTGGTGGAGGAGGATGAGGAAATTGGGAGTGCG…	1208	LCSEAVVGKRVRVFWPLDKTWYEGSVKSFDKQSSKHVVQYDDAEEEVLDLRKEKIEWVEDQVRSFRRLRRKSVPEEVXG*GKGVDDGSGGDDDSTDEDWGKSAGKETGDVDSDGDDDSEELELVEEDEEIGSAKRPRAGDLGSRKRKVIEQEKSGSGKKSRGGGIGEMLGLKVAPGKPVEPATNLENAFANTLMGDTAERFGRREAEKLGFLGPGRRDACRRLPGDENYDPRTLYLPPIFLKSLSGGQRQWWEFKSKHMDKVLFFKMGKFYELFEMDAHIGAKELDLQYMKGEQPHCGFPEKNFSVNVEKLARKGYRVLVVEQTETPEQLELRRKETGSKDKVVKREICAVVTKGTLIEGEMLSLTPDAAYLISVTESCKNIENQKEEEVVLGICLVDV…
	347	UN000939	1053	ATACAGGGCTGCCGCTCCGTCGAGGAGTTTCAATGTTTAAATCGCATTGAAGAAGGAACTTACGGCGTAGTTTACCGCGCTAAAGACAAACGTACAAACGAGATAGTAGCCTTAAAACGGCTAAAAATGGAGAAGGAAAAAGAAGGCTTCCCCATAACGTCGCTGCGTGAAATCAACACGCTACTTAAGGGGCAGCACCCGAATATAGTGACAGTTCGCGAGATAGTGGTCGGTTCAAATATGGATAAGATCTTCATTGTTATGGACTATGTGGAACATGACCTCAAGTCGCTTATGGAGACTATGAAAGCGCGCAAGCAATTTTTCCTTCCTGGTGAAGTGAAATGTCTGACGCAGCAGTTACTGCGTGCAGTTGGTCATTTACACGATAATTGGATA…	351	IQGCRSVEEFQCLNRIEEGTYGVVYRAKDKRTNEIVALKRLKMEKEKEGFPITSLREINTLLKGQHPNIVTVREIVVGSNMDKIFIVMDYVEHDLKSLMETMKARKQFFLPGEVKCLTQQLLRAVGHLHDNWILHRDLKTSNLLLSHKGILKVGDFGLAREYGSPLKKYTSLVVTLWYRAPELLLCSPEYSTPIDIWSVGCIFGEFLQMAPLFPGKTETDELNKIFKELGTPNERIWPGYKDLPLVRNMLSQNSQFADYPVSNLRRRFAEKTTDIGIELIQGLLTYDPKKRLTAEAALKHGYFNELPLPIDPSMFPTWPAKSELGARKALASSPKPPSGGSQFKQLGRDEI
	348	UN000940	321	TATGCTGCAGGTTTCAAGAAAAATCATATCAAGATAGAGATCAACAGAGATGGAAACAGAATCACTATAAGTGGTGAGAGGGTTGTTCAGGAGATGGTGTTGGTGAGGTGGCAGATGTATAAGACAGACACAGGAATTAGGCATTTCAGGAGGGTTTTCCGGATTCCAGACGGGGTGATTTTGGATCGAATAAAAGCGAGGTTGGATGAGGAAGACATGATTTTGACCATTTTCATGCCAAAATCAGAAAGAGGGATTAGAGGGCTTGGAATTGAAGATGTTGAAGAAGAGAAGCCTGACAGTAGGAGCACTGAACAAATG	107	YAAGFKKNHIKIEINRDGNRITISGERVVQEMVLVRWQMYKTDTGIRHFRRVFRIPDGVILDRIKARLDEEDMILTIFMPKSERGIRGLGIEDVEEEKPDSRSTEQM
	349	UN000941	1224	ATGACTACCAGTAAGCGTGTACAGGACAGAAGCAAGAAAAAAAGGGTGCATGATCTTGAAATTGTAACAGAGAAATGGAAGATCCTCTCAAAGGTGTTGCTTGTAATTGAGGCTTTGAAAAAGGAACCTGAACAGGTCATAACACTACGGGAACTAGAACAGTACCGGCAGCAGATCAATCTTCGCAAACCACACAAGGTTATAGATTTCATCCGTAAGTCGCCAAAATTGTTCGAATTGTACAAGGATCAGAAGGGCGTGATATGGTGCGGGCTAACAAAGCAAGCAGAGGACCTGGTAGAGGAGGAGGAGAGGCTCAAAGAAGAGCATGGACCCCTAGTAGCAGAGTATGTGACACGGTTTTTGATGATGTCTGCTGATAAGAAGCTTCCTGTTGAG…	408	MTTSKRVQDRSKKKRVHDLEIVTEKWKILSKVLLVIEALKKEPEQVITLRELEQYRQQINLRKPHKVIDFIRKSPKLFELYKDQKGVIWCGLTKQAEDLVEEEERLKEEHGPLVAEYVTRFLMMSADKKLPVEKIAHFRRDLGLPYDFRSRWIHSFPEHFKVVKVDDVEYLELVLWNPAWAVTELEKQAHPGIEANPPSPGLLCLPFPLKFPPNYKKVFRYGGQIEHFQKREYLSPYADAGELKPGSREFDKRAVAVMHELLSFTLERRLVTDHLTHFRQEFVMPQKLMRLLLKHFGIFYVSERGKRMSVFLTEAYEGSELIKKCPLMLWREKIQRLIGYRGRKQRPKTFNEFSDVEGDDLFGNDSDGENAVTGFDDDESVGTLEDASFTDDAEMEVGE…
	350	UN000949	5292	ATGGCAACCTTGACACACGCCGAATCTAGGCGCCTGTATTCTTGGTGGTGGGACAGTCATATCAGCCCAAAAAACTCGAAATGGCTTCAGGAAAATCTTACAGGTGTATTTGTTCTCGTAATAGATATGGATGTCAAGGTCAAAGCAATGATCAAGCTCATAGAAGAAGATGCGGACTCTTTTGCAAGACGGGCAGAGATGTACTACAAGAAACGTCCAGAGCTCATGAAGCTGGTTGAGGAGTTTTACCGAGCATATCGTGCTTTAGCCGAAAGATATGATCATGCAACTGGGGCACTGCGTCAGGCACATCGAACCATGGCAGAAGCATTCCCTAACCAAATTCCTTTCGTTGATGATTCTCCGTCGAGCTCTTTAGCAGCTGAGACAGAACCACAT…	1764	MATLTHAESRRLYSWWWDSHISPKNSKWLQENLTGVFVLVIDMDVKVKAMIKLIEEDADSFARRAEMYYKKRPELMKLVEEFYRAYRALAERYDHATGALRQAHRTMAEAFPNQIPFVDDSPSSSLAAETEPHTPKMSHPIRALLDPDDLQKDSLGVSSHFQAIKKNGAYPEDNVAVTSKKGLKQLNEMFTPADGTDHARFAEGRVRKGLQFQEDNRRISEVTAQNIFSRDVQKHKLEEIDGNCSKISSLQDEVSQLSTDNQNLRTKVLAESQRADKARNEVGSLQQILSKLESDKEAAVLQYQQCLEKLSSLEAEISRRQAEVSKLNGEIVEGATRLKATEERLLLLEKANQSLQLEVDSLMQGATAQQQELMKKNEELEKLNVCIQDEHTHLMCAEA…
	351	UN000955	1224	ACCTCGAATTTTGACACCTTAGTGCATTTGCTGAAGGGTAACATCGGAACAGGAATTTTGGCTATGCCAGATGCGTTTAAAAATGCAGGCCTATATGTGGGACTATTTGGAACTCTCATCATGGGAGCAATTTGTACGCATTGTATGCACATGCTCGTGAAATGCTCTCATGAGCTTTGCCGAAGGCTTCAACAGCCGTCACTTGATTTCTCCGAAGTAGCCTTTTGTTCGTTTGAAACGGGACCTATTGGCTTGCGACGTTACTCCCATATTGCGCGACGCATGATAACGACATTCCTTTTTATAACTCAAATTGGGTTCTGCTGTGTTTACTTTGTTTTTGTGGCCTTCAATATCAAGGAGGTGGTGGATCATTATTTTCCACACAATTATATAAAT…	408	TSNFDTLVHLLKGNIGTGILAMPDAFKNAGLYVGLFGTLIMGAICTHCMHMLVKCSHELCRRLQQPSLDFSEVAFCSFETGPIGLRRYSHIARRMITTFLFITQIGFCCVYFVFVAFNIKEVVDHYFPHNYINVKVYLVLILLPMIPLNLVRNLKYLTPVSLAAAVLTVLGLAFSFFYILQDLPDTDTVKPVASWAQLPLYFGTAIYAFEGIGVVLPLENNMKKPEDFGGTTGVLNTGMTVVACLYTTVGFFGYLKYGENVKGSITLNLPPDQFISQMVRIAMAVAIFLSYTLQFYVPVNIVEPFVRNQCEEQRTKELASTALRIVLVVFTFLLAVCIPNLGPIISLVGAVSSSALALIAPPIIDVITFYPVGLGKYNWILWKDMAILVFGLCGFFFGT…
	352	UN000960	5874	GATCTCAAAGTCGAACAAGAAGAAGACTCAAAACTCCTGCCGATTTCTTATGATGCAAAACTGAGAGAGCTTCTGCGGAATCTATGTTCACTTGAATTAAAGATATATTCTGAGGCCTCCAAAGAATTTATACGCATAATAAGACGTGGTTTAGGTGGGGAATTTCTTCGTCATTATGTTCAAGCTTCTCCTTCATGCATGGAGTTGATGGAAGTGTGGAAGTTGCAACAGGGGAAGGCTGGAATGGCTCATATAGTGTTGTTAATTTCAGAAATTCTGGACCATCCAGATGGAAAATACTGTATGGATGATATTGGAAGACTTGCTATAAGTAGAAGGCTTGACAAGCTTGCCCAGTTGATTATTGATAAAAAGATGCAAGATGTATATACAGAGCTG…	1958	DLKVEQEEDSKLLPISYDAKLRELLRNLCSLELKIYSEASKEFIRIIRRGLGGEFLRHYVQASPSCMELMEVWKLQQGKAGMAHIVLLISEILDHPDGKYCMDDIGRLAISRRLDKLAQLIIDKKMQDVYTELNSREAKRQRAVLLLMAAIVRRGVGLASEVTKIFDFKLAVFPKLAEIHQKKGGKKLKHSTRPSFIKYAMAFLEVGNPRLLRWILQQRDMYFSVLRGLGSDDDATVNHVLTTLRDKVLSPDSLVPPSLRSVLFGSVTLEQLSNISGNSMGGPSAELAHEILVTVCTDPCNGLMPDLKDHMNPLRGNPKRLLELMKKLKVTEVKYHRDLLLALVSGSPSLGSAYMDEFPYILEPRASPLWFSAISLATDLISSAKAHMSITSLGLQSNH…
	353	UN000961	453	GCTGCTTTCAATCCAGTGATTCCTTTACCTGATTTGGTGGAAGTCTCTACAGGCGAGGAGAACGAGATTGTGCTATTCGAACATCGCGCCAAGCTTTTGCGTTTCGACAAGGAGACGTCCGAGTGGAAAGAGCGCGGTATCGGCAACATTAAATTACTGCAAGATAAGGACGACGTAAACAAGGTGCGCTTGGTAATGCGACGCGAGCAGATCCATAAGCTATGTTGCAATCAGCGCCTATATAAGAATACCGTATTCAAATATGCAAAGAATTCACAAACTGCACTGACATGGGCTGGCCGAGACTTTTCAGAGAATGAACTGGTTACTGAAATGCTAACAGTGCGTTTCAAGTTGTCGGAAACATGCAAACAGTTCCATGAAGCTGTGATCAAAGCG…	151	AAFNPVIPLPDLVEVSTGEENEIVLFEHRAKLLRFDKETSEWKERGIGNIKLLQDKDDVNKVRLVMRREQIHKLCCNQRLYKNTVFKYAKNSQTALTWAGRDFSENELVTEMLTVRFKLSETCKQFHEAVIKAQANMSDKADEDNVKSVAA
	354	UN000962	5241	GTTGACTCGAATCACATGTCTACATAAAATATGGCCCTTAGGAAATGCATACCTTTCAATGATGCTTCTTCTCCTAGCATGGCGCCTTTGAAACTTTCGAAAAAGGCGCATGAAAAGGCTCAAGCGCCAGAGCCAGACTCGGGTTCTCCTGCAGAACCTGATGTCAATCTTGACCTCAGAGAAGTATACTTTTTGATCATGCATTTCCTATCAACTGGGCCATGCCAGAGGACTTTTGGGCAGTTTTGGAATGAGCTTTTGCAGCATCAACTTCTACCAAGAAGATATCATGCTTGGTATTCCAGGATTGGGCTACACAGTGGTGATGAAGATGATAATGGCTTGTCCTTACCTTTAAGCTACAATAAACTGGTGGAGAGATACCCTCATGTCGAAAAG…	1747	VDSNHMST*NMALRKCIPFNDASSPSMAPLKLSKKAHEKAQAPEPDSGSPAEPDVNLDLREVYFLIMHFLSTGPCQRTFGQFWNELLQHQLLPRRYHAWYSRIGLHSGDEDDNGLSLPLSYNKLVERYPHVEKDHLVKLLKQLMLRTSPPLRGMVGGNAPTAADVPTLLGAGSFSLLESDRRRENKTTRVPGYLRWPHMKADQVRGLSLREIGGGFTKHHRAPSIRAACYAIAKPSTMVQKMQIIKTLRGHQNSVYCATFDRTGRYVITGSDDRLVKIWSMETGFCLSSCRGHEGDITDLAVSSNSALVASSSNDCVIRVWRLPDGLPISVLRGHTATVTAIAFSPRPSAVYQLLSSSDDGTCRIWDARYSHFHPRIYIPKPPDAVAGKSNDPSPSTGQ…
	355	UN000965	2832	CATAAAGAAATGTTAGCTATTTTAACGGCGTTAACGGAAATTATACGCGAACGCGGCGGCACCGAGTCATCCACTGAGTATTTCATACTGCTCATGGAGCAAATTGAGGCCAGCACGGAAGACAATGACATCATTGCTGGGATTTCGTTGCTGTCTATGGGCATCAAATCGGTGCCAGATGCGGTGTTGCGCAAACGTTTTGGCGAGACCGCACAAACGTTTTTAGCGTGCTTGCAACGTTTTATGGAGTCTAATAATCAGAATATTGTTAAATATATAATTGGCTGCTTGTCCGTGTTGCTTTGCGCGCAAGACTACATGACGTGGACTTATTCTTCGAATTGGCAATATATTGACGCTATACTCTCATTTACTATACATTCGAAGCCTAAGGTACGC…	944	HKEMLAILTALTEIIRERGGTESSTEYFILLMEQIEASTEDNDIIAGISLLSMGIKSVPDAVLRKRFGETAQTFLACLQRFMESNNQNIVKYIIGCLSVLLCAQDYMTWTYSSNWQYIDAILSFTIHSKPKVRKAAQHAIVSIVHGSSFMRPAKDEEEEGEDNTTVEQPKVTSHPASSRITKFCLNQFKPEVLTNSQTTVLHTLTLLKDILSGLKTEDIRSICENLLSIMTAANVLIRTTCFQTLHALFASRTTNLNGPLCAKLLAAIHEYRPDRADVRQTIAWITVLKEGHIHLASLDLNLCMNALPRFFEICATDLWMSERAEIINSVSNCIKELLYECVKSACETPEKAEVYRIPIMRIIASLEKVLSAPFGEMAKHVILIFTIVFEVCGKYFSKE…
	356	UN000968	756	GTATACAGTCGTGGTGTGCCCGATCCGGGTAAAAGTGTCAAAGTATTGTATAATGGCGGTCAAAATAATTTCGTATTGGAACGACCGTTGCAGTTTCAATTGCCCAGCATACCCGAGAATCACAATTTAAATCTGTATTATAATTTTGTGGATCCAAAGAATATGATTGATGTATTCGCTGCGATGTTGGCAGAGCGACGCATCATTTTTACATCGCGACGTTTGGATCGCTTGTCGTCGTGCATCCAGGCGGCGAATGCGTTTCTTTATCCTATGGTGTGGCAACACATTTTCATACCAGTGCTGCCGATGAAATTAAAAGACTACTTGAGCGCGCCAATGCCATATCTAATTGGTGTGCCACAAATAGTTCTCGACACGATGACACCCGAAGAGCTC…	252	VYSRGVPDPGKSVKVLYNGGQNNFVLERPLQFQLPSIPENHNLNLYYNFVDPKNMIDVFAAMLAERRIIFTSRRLDRLSSCIQAANAFLYPMVWQHIFIPVLPMKLKDYLSAPMPYLIGVPQIVLDTMTPEELGDVVILNCDKKCFESPFDDVREMPADIVSHMKKQLSHSHEHIGDRVSKIFLGVLVQLISGYRDAVEFRGVGKTFNRHKFIESRPKHLRPFLTKMMDLQIFQQFIDERLQMLNTGLGYSD
	357	UN000971	5667	ATGAGAGTTCCAGATGATGTTAATGGATGGGACTGGCCTAACGGCATCATGGCTCCTGGTGCTTTGGTCAAAGAAAAGTCTACTACAATGTCAAACATGCCCAAGCACTCTGATTCATTTGGAGGATCAATAAATTCAGGACAATCTTGGAATCGTTTTCTATCTCCCAACAACTTTTACCTAGGACAGGATGTCCTGGAAAAATCAGTAAACAAAGTTTTGTGTAGTGGGCAACAGAGTAATTCTATGGAGCGGCATAAAGTTGTGCATAATGGACAACAGAGTAATTACATGGAGCGACACATAGTTCAGAAGAGCTTTGCTGATACTTCACAGAGCATTTTTCCCTCTTTGACAGGTAACCAGATGTTGCAAGCAGCAAGGGAATCGTCTAGTTCA…	1889	MRVPDDVNGWDWPNGIMAPGALVKEKSTTMSNMPKHSDSFGGSINSGQSWNRFLSPNNFYLGQDVLEKSVNKVLCSGQQSNSMERHKVVHNGQQSNYMERHIVQKSFADTSQSIFPSLTGNQMLQAARESSSSLSKTALDKGRQSNWYPSIDIASKSGSPFIADPSFRFSKFFGTATDVSCCNNLREAFVMDVDGAVPSNIELRLGQPSQQSNTLGDSTLPPVRPLSFESPFDIPKSRLCEPLVHNALNPRVTDELRQNLVCAPSDISNSNGREDNSELDLVRHALRSLNAMDPAKLEQLKGDVTKSSQICTFLSHFINPTEGDMQSHVAKRTDNTVSNGEHCMPKVLGGDSQIAKFDPADFPRNMTDGLNGKLNTSGLVHSNFMDKGKWSRTLSDDCH…
	358	UN000973	5151	GTTGTTCCTAGTGTTCTTGACATAACTGTTCACACACCCTATGATTCCCAAGTAATATTGAAGGGAATCTCTACTGATAAGATTCTGGATGTGAGAAGGCTATTGGCTGTGAATGCGGAGACATGCCACCTTACCAATTATTCACTGTCTCATGAGGGCAGAGGACAAAGATTAAATGATGCGGTCGAGATCATTTCTCTAAAACCGTGCATCCTGAAGATTGTTGAAGAGGACTACAGCGAGGAGGATCAGGCGAAAGCGCACGTGCGAAGGCTCCTGGATATAGTGTCCTGCACTACCTGCTTCGGAAAGCCGAGCAATGGAAGATCTGAATCACCAACACCATCGTCGTCACCGGCCAAATCCAAGAACAAGATCTCGAGCCGTCCATCTTCTCCA…	1717	VVPSVLDITVHTPYDSQVILKGISTDKILDVRRLLAVNAETCHLTNYSLSHEGRGQRLNDAVEIISLKPCILKIVEEDYSEEDQAKAHVRRLLDIVSCTTCFGKPSNGRSESPTPSSSPAKSKNKISSRPSSPSDDEISPISEQFGMAAIQPQPKLSSFYDFFSFSHLTSPLIFVRRCDRRNGEERGAGDHFEMEVKICNGKLVNIVASVEGFYSVGKQFIRSHSLVNLLQQLSSAFANAYDSLMKAFVEHNKFGNLPYGFRANTWLVTPMVADCPSKFPSPPTEDEKWGGNGGGQGCNGKYDYRPWAAEFSILARMPCQTEEQRQIRDRKAFLLHSLFVDVSVLKAVSAVRRIMDGDIDINKNLSSISSDSLLHEEQVGDLSIKVKKDEADASIKSVD…
	359	UN000975	5604	ATGGGAAAAGGAAGACCTAGGGCAGTCGAGAAGGGCGTTCTAGGAGGGCACTGCTCCGGCGGTGCCTCTCCTTCAGAAACAACAACCGTCCTAAACATCCCTCAAGCCCCCGTCTATTACCCTACAGAAGAGGAATTTAAAGACCCTTTGGAATTCATCGACAAGATCCGACCCGAAGCAGAGTCCTACGGCATCTGTCGGATCGTTCCACCCGAAAGCTGGAAGCCTCCATTCGCCCTAAACCCAGACTCTTTCACCTTCCCCACCAAATCCCAAGCCATTCACCAATTGCAAGCTCGTCCCGCTCCCTGCGATCCTCGTACCTTCGAATTGGAATACAACCGATTCCTCCAAGATCACTGCGGACGGAAGCCCAAGAAACGCGCCGCGGTCGTTTTC…	1868	MGKGRPRAVEKGVLGGHCSGGASPSETTTVLNIPQAPVYYPTEEEFKDPLEFIDKIRPEAESYGICRIVPPESWKPPFALNPDSFTFPTKSQAIHQLQARPAPCDPRTFELEYNRFLQDHCGRKPKKRAAVVFQGEELDLCRLFNAVKRFGGYDKVVKEKKWADVFRFVRSEVKQKVTECAKHVLCGLYREHLYDYELYHCGLRLDQGKNKFKRRRGGRDSKNGNEMPGLECKRPRKNVQEERVKEEENEKEKEKEKEKELDQICEQCRSGLHGDVMLLCDRCNKGWHLYCLSPPLEQVPSGNWYCLECVNSDKDSFGFVPGKRFSLEAFRKMAERAKKKWFGAAVLSRAHIEKRFWEIVEGSLGEVEVMYGSDLDTSLYGSGFPRANDPLPASVEAEV…
	360	UN000977	5352	GATGTGCTGCAATCATTTATTTGGAGAGTATTTCTTCCATTAGTAAAGATAATTAATCCAAATGATTCTGAATTACTTGACCAGATTACAGAATTATTGTGTGGTATTGTGATCGAGAATCATGCATGGGAAGTAATGGAGGTGACTTTGGTGCCTTCTTCTCTGAGAGCCACGGGTATTTCTATAGGTCTGATTCAGAATGAAGAATTAGCTATATACCAATGGAGCAGACACTCACTCATTCAAGTTGCAAATGGCAAGATAAGTGATTCAAATGTAGATCAAGATGTCGTATTATTGTCGTGTGAGTCAATACCGCTGTCCAGCATGATCCATATTTTAACTTCACTATTGGTTGCTGCTATAAAAAGTTTCCAAGCAGTTGAAAGTACAGACACT…	1784	DVLQSFIWRVFLPLVKIINPNDSELLDQITELLCGIVIENHAWEVMEVTLVPSSLRATGISIGLIQNEELAIYQWSRHSLIQVANGKISDSNVDQDVVLLSCESIPLSSMIHILTSLLVAAIKSFQAVESTDTVQLKKVGGHVSPEKFARHVLWDLSNMAICMLSQSSEHRSMAIRFIFPFVFTALHELSSFEVSVHGSTYVFCRGQFFRKIWECCKSLFCLGPLERQDAYRLLSLYLSYFFHIEGCKSVAVTKCAKDFDIREENMFWEEMRRGLIDKDGLVRKLSLHILKISLGHYSSSLSTEETSFNKVSSEASSFNHVSSEAKGDSKNGLLSSIDGSSVVRPMTKRGKWAEKEAYSLGVQKVNNSSEPCSNDRQRWEAFFLLYEMLEEYGTHLVEA…
	361	UN000980	4398	AGGCGGATTTTCACGTGTATCGGGAGGGTCCCAGTTTTCAAGGAGAACCATGCAGATTCGGGTCCAGTTGCGAGAGAAGCTGCTGCAGACGGCCAATNNGTTGGTATTGGATTCAAAACCACAGTCTTCTGTTGCTTCTATATGCTGTTTTTGCAATCTTTGGTATTGGGGTTTGAAATTGTGGGTTTGGTGAGAGAAAGGAATTTTGAGGATTGGTCTGCAATTTACTTGCCGTCTGTACAATTCTTGTCTTGGTTTGTTTTGAGCGTTTCTGCATTTCACTGTAAATTCAAGGCCTCTGAGAAATTCCCATTATTGCTGAGAATATGGTGGTTTCTATCATCCATCATCTGTATTTGCACCGTGTATGTTGATGCCAAGGGACTAATTCTTGGGTCG…	1466	RRIFTCIGRVPVFKENHADSGPVAREAAADGQXVGIGFKTTVFCCFYMLFLQSLVLGFEIVGLVRERNFEDWSAIYLPSVQFLSWFVLSVSAFHCKFKASEKFPLLLRIWWFLSSIICICTVYVDAKGLILGSGDLNSHILLNFAATPALLFLFFVAIQGVTGIEVHRNQDLQEPLLEEEAGCLKVTAYSEAGFFSLATLSWLNPLLSIGAKRPLELRDVPLLAPKDRSKTSYKILKSNWEKMKAENPSKQPSLALAIFRSFWKEAAWNAVFAGLNTLVSYIGPYLVSYFVDYLGGIVAFPHEGYILASIFFGAKLVETITTRQWYLGVDILGMHVRSALTAMVYRKGLRLSSTARQSHTSGEIVNYMAVDVQRVGDYSWYLHDIWMLPLQIVLALAIL…
	362	UN000981	3039	AGAGAGGGCGTAGCTAAGCTAAGTGAACTTGGCGGTGTCAGCAAATTATGCGATAAATTATATACATCAACAAACGATGGTCTACGAGGGACAAGGACGGACATTGAGCATAGGCGTGAGACATTCGGTTCTAATGTTATCCCACCGAAACCCCCAAAGACATTTTTAACATTAGTGTGGGAGGCGTTACAGGATGTCACACTCATTATTTTAGAAGTAGCTGCGCTGGTTTCACTTGGTTTATCATTTTACAAACCCGCCGACGAGGATGCACCTGTACTGCAAGAAGAAGACGAGCACCATGGCTGGATAGAAGGTCTAGCGATTTTGATCTCGGTCATCGTTGTAGTATTTGTGACAGCATTCAATGATTATTCGAAAGAACGTCAATTTCGAGGC…	1013	REGVAKLSELGGVSKLCDKLYTSTNDGLRGTRTDIEHRRETFGSNVIPPKPPKTFLTLVWEALQDVTLIILEVAALVSLGLSFYKPADEDAPVLQEEDEHHGWIEGLAILISVIVVVFVTAFNDYSKERQFRGLQNRIEGEHKFSIIRGGEVCQISVGDIVVGDIAQIKYGDLLPADGILIQSNDLKVDESSLTGESDHVKKGVDVDPMVLSGTHVMEGSGKMVVTAVGVNSQAGIIFTLLGAAVDEQETEQKKRKKGADDGQGPMKNVQVSPPQKDGIKSESDGNHVQQAASPVEAGHKKEKSVLQAKLTKLAIQIGYAGSAIALLTVIILVIQFCVKTFVIEEKPWKNTYANNLVKHLIIGVTVLVVAVPEGLPLAVTLSLAYSVKKMMKDNNLVRH…
	363	UN000983	2805	AAAGTGTTTGTGAAGAAGGAGAAGAAGAGACCTCGGTCAGGAAGCGACGCGGAGTCGGACGAGGCTCGGAAGGTCGGTCGTGGGAGCCGGGAGAGCGGTAACGGTTCCATCGATCAGAAGAGGAAAACAGCAGCCAAGTCAGTAGCTGAGAAAAAGAGGGACGGGACGGGGCGGTTTAGAAAGGATGGTGGAATTGGTAAGGGTAGAGTCAGGGAAGAACAGTTGAGCGATGAAGATCCTTATGAATTCAAGGAGGATGTGGAAATCAGTAGGAGAAAGACGAATAAAGGATCTCTGAAGCATAGAGAAGATGGAATTGGGAGGAAGAGAGGTAGAGGGGGTTTGCTCAAGTCCAATGAACAAGCTGCAATTGACAAGAAAAAGGTAAAAGTGGAGAAT…	935	KVFVKKEKKRPRSGSDAESDEARKVGRGSRESGNGSIDQKRKTAAKSVAEKKRDGTGRFRKDGGIGKGRVREEQLSDEDPYEFKEDVEISRRKTNKGSLKHREDGIGRKRGRGGLLKSNEQAAIDKKKVKVENGKGGEEKFENMGDLDSKNAGSSTRQKKESEPECSGSSAIEKGTPSNSHMSSGSVVEKNKGADWFDKKVFSVERVNDFRLVGTSQEKNSLCTPGKGGVLKASSNSKMKAGGITKKLDGRESEDSPKHPGLSSFSNRKALTDPSISGRRKLPEKPSSAVTVTKNQKIEKKKVSDREAVDSERSLQTDSKNLGAGSKSKSEVKNEGESPLVLERASSSSQKETVEEKVSGTEKQVLRIQIKDMLLNAGWTIEYRPRRDQNYKDAVYINP…
	364	UN000985	5442	ATGCATCTTTACAATGCCTGGCTTCCTCCTCCCGTCGCTGAAGAAGCGATCAAAGAGAAGGAATCTTTCTCATCTCTTGTCAATTCGTTGAAGGACTCTTGGCGACCCGACGATCCAGATTCCGCATATTCTACTCTCAAATGGATATCAGTCCTCGAGCTTTTTATAAGAGCAAAAAGCGAAATATCTTTGGATGATGTGGGAGCTCTTTTGGAAGTTGGGTTAGAAATATTTCATAGATCGCAAAACAAACTTTATGTGCAGGTGAGATGGGGAAGTATCTTAGTCAGATTCCTAAAGAAGTATGGAAAGAAATTGTCGATGAAAGTTCAGTGGCGACCTTTCTATGACACTTTGATGCATACACATTTTTCAAGAAATACAGGCCCAGAGGGTTGG…	1814	MHLYNAWLPPPVAEEAIKEKESFSSLVNSLKDSWRPDDPDSAYSTLKWISVLELFIRAKSEISLDDVGALLEVGLEIFHRSQNKLYVQVRWGSILVRFLKKYGKKLSMKVQWRPFYDTLMHTHFSRNTGPEGWRLRQRHFEAVTSLVQSCRKFFPAGSAFEIWSEFRSLLENPWHNCSFEGSGFVKLFLPTNMENRDFFSQDWIKQCLDLWNSIPNCQFWDIQWAGIFARCIKNYNSIDWECFLPALFTHYLNMFEVPIASGSGSYPFSINVPRNTRFLFSSKVVTPATAIAKSIVYLLKPGSSAQVYFENMANLLEQYYHPSNGGRWTYSLERFLRYLVINFQKRLRHEQQNADDYVKVELCLGERERAAFVKVVLKLIDRGQYSKNESLADTVAAAT…
	365	UN000990	516	TTCCCCATACCAGACCTAATTGGCACAACAGAAATCCTCACAGAAGAGCATCGTGAAAAACTTTGTGGACACCTACCTGCACGTGCTGAAGGCTATTCGTGGTCATTGATTTTCAGCACATCCCAGCATGGCTTCTCGCTGAATTCGCTCTACCGAAAGATGCAGAAACTCGAAAGTCCAATCCTAATTGTCATACAGGATACAGATAATAATGTGTTTGGCGCATTAACGTCCTGCTCCCTGCACGTCTCCGACCACTTTTACGGTACCGGTGAATCGCTATTATACAAATTTAATCCCAGCTTTAAAGTGTTCCATTGGACCGGCGAGAATTTATATTTCATTAAAGGCAATATGGAGAGTTTGTCAATTGGTGCTGGAGATGGTCGATTTGGTCTT…	172	FPIPDLIGTTEILTEEHREKLCGHLPARAEGYSWSLIFSTSQHGFSLNSLYRKMQKLESPILIVIQDTDNNVFGALTSCSLHVSDHFYGTGESLLYKFNPSFKVFHWTGENLYFIKGNMESLSIGAGDGRFGLWLDGDLNQGRSQSCSTYGNEPLAPQEDFVIKTLECWAFV
	366	UN000991	1239	ACCGGTGAACGCTTCTTTGTCGATCACAATACACGTCGCACCACCTTCGAAGATCCACGTCCGGGCGCCCCCAAAGGCGCAAAAGGTGTGTACGGTGTGCCGCGCGCCTATGAGCGCTCATTCCGTTGGAAGCTCTCACAATTCCGCTACCTGTGCCAGAGTAATGCGTTGCCATCCCACATTAAAATCACTGTGACACGACAGACGCTGTTCGAAGATTCATACCACCAAATTATGCGTTTGCCTGCATATGAGCTGCGACGCCGCCTTTACATTATATTCCGCGGCGAAGAGGGTCTCGACTATGGTGGCGTGTCACGTGAATGGTTCTTTTTGCTTTCACATGAAGTGCTCAATCCCATGTATTGTCTCTTCGAGTACGCTAACAAAAACAACTAC…	413	TGERFFVDHNTRRTTFEDPRPGAPKGAKGVYGVPRAYERSFRWKLSQFRYLCQSNALPSHIKITVTRQTLFEDSYHQIMRLPAYELRRRLYIIFRGEEGLDYGGVSREWFFLLSHEVLNPMYCLFEYANKNNYSLQINPASYVNPDHLQYFKFIGRFIAMALYHGRFIYSGFTMPFYKRMLNKKLTIKDIETIDPEFYNSLIWVRDNNIDECGLELWFSVDFEVLGQIIHHELKENGEKERVTEENKEEYITLMTEWRMTRGIEQQTKTFLEGFNEVVPLEWLKYFDERELELILCGMQDVDVDDWQRNTIYRHYNRNSKQVMWFWQFVRDTDNEKRARLLQFVTGTCRVPVGGFAELMGSNGPQRFCIEKVGKETWLPRSHTCFNRLDLPPYKSYDQL…
	367	UN000996	4629	TACAATTTCCTAAGGTCGTTCAGTCACCAGTTGTTCTTGAGTCCATTTGTACTCGAGGATTTCGTTGGTGCTCTCAACCATGCATCGCAGAACTATCTTTTGGATGCTATTCATGTGTCCTTATTGAGGGCACTGCGGCGACACCTTGAGGAGGTTTCTAGTGATGGAAGCGGCGGTGAGCTAGCTTCAAAATGCCTGAGGTGTCTGGATTGGAGTTTGATTGATACTTTAACTTGGACAGTTTATGTAGTGGAATATCTTCATATGATGGGATATACAAAAGGGAAGGATTGGAAGGGTTTTCATGAGCATGTGTTGAACAGGGAATACTATAGCTTGTCTGTGCATACAAAGCTGAGGGTTTTGCAGTTCTTGTGTGATGACCTCTTAGAATTTGCA…	1543	YNFLRSFSHQLFLSPFVLEDFVGALNHASQNYLLDAIHVSLLRALRRHLEEVSSDGSGGELASKCLRCLDWSLIDTLTWTVYVVEYLHMMGYTKGKDWKGFHEHVLNREYYSLSVHTKLRVLQFLCDDLLEFAELRAEINMRECKEEGTNVDDDAMLTSENGPKRVHPRYSKTSACKDAETMENIVEPCESKPSHNGSSADSSKLIELEANASDSVDDGNGDECKLCGMDGTLLCCDGCPYAYHPRCIGLTKASIPEGQWFCPECSVNKMGPVCSRIGKGLRGAEVFGIDPFERLFLGTCNYVLVLETSINAEPICRYYSHNDVLELLGVLCSSAQHSLLYSQICKGILQYYEISEDAILLHSGGTKSEAKCLDGDNGTEPDINPLDGKEQAACTEFST…
	368	UN000998	4629	ATGGGAAACAAGATTGCTCGAACTACGCAGGTATCAGCATCTGAATACTATCTCCATGACCTGCCATCTTCCTACAATCTTGTTCTCAAGGAAGTTCTTGGTCGTGGGAGGTTCTTCAAATCCATACAGTGCAAACATGATGAGGGACTTGTCCTTGTCAAGGTTTACTTTAAGCGTGGGGACTATATAGACCTTAAGGACTATGAGAGGAGGCTTTTTGAGATAAGGGAGATATTTCGTGATGTCCAACACTCTCATGTTTGGCCATTCCAATACTGGCTTGAGACGGATAAAGCCGCATATCTTTTGCGGCAGTACTTCTTTAGTAATCTTCATGATCGATTAAGCACCCGACCATTCCTCAGCCTCATAGAGAAGAAATGGCTAGCTTTTCAGCTT…	1543	MGNKIARTTQVSASEYYLHDLPSSYNLVLKEVLGRGRFFKSIQCKHDEGLVLVKVYFKRGDYIDLKDYERRLFEIREIFRDVQHSHVWPFQYWLETDKAAYLLRQYFFSNLHDRLSTRPFLSLIEKKWLAFQLLYAVKQSHEKGVCHGDIKCENVLVTSWNWLYLADFASFKPTYIPDDDPSDFSFFFDTGGRRRCYLAPERFYEHGGEMLVAPDAPLKPSMDIFSLGCVLAELFLEGQSLFELSQLLAYRRGQYDPNQCLEKIPDSGIRTMILHMIQLDPESRLSSESYLQSYASVVFPSYFSPFLHKFFSCLSPYDSDTRVAVTQRAFHEIRKQIMNSQLIEETGPKSCKSSEPLTSEPSQLIHNVKQNIKSPKGSLRKGVDQERGLLSNQFNFVAD…
	369	UN001000	1674	GACCAGGGTGTTCCCCTCTTTAGACGTCAAAGTACATGTGAGCTTGAGGGAGATTCAACGGTGGATGAAATTCTCAACCAGCAATTTAAAATGTACACATCTCTCTCTCAGATTGAATCCGGGGTGAAAATGGTTCAGTCACTTGTACCAATCTGGGAGGAAGAGTATGAAAGGACAGGTGTGCATGACGCAGTGAAATCTCCTGATCCTAATAAGCCACCTCCTGAATATGTATTGAGAACTTTCTCTCATGGGTTTGGATTTGAGGATGCATTCTTGGACTTGTGTGCGGAAGCTCATAATTCACCTCATCAAGTTACTCCACAGGAAGAGGGTGATAACTTTGTGAAATCTGTAAGATCTTTAACTGATGTGTCTGACTTGCACAAACTTGAGGCA…	558	DQGVPLFRRQSTCELEGDSTVDEILNQQFKMYTSLSQIESGVKMVQSLVPIWEEEYERTGVHDAVKSPDPNKPPPEYVLRTFSHGFGFEDAFLDLCAEAHNSPHQVTPQEEGDNFVKSVRSLTDVSDLHKLEAHAGSSIFHGEPKYQYMERKNDSTLPQGSFPKTGDDVISLEHRDGFYGPAPIIEEMLSTETIETSITKGVDSEALGLLRWLASSQAREDIITDDELVHEAILSPLLPTTIEKALERAHLEYESESQQECQDILDSVVGKEEITCFPDQGPSARTSSENMIPQVDSSCGDPFISHRX*FIGNGDEQ*CAEAFPAYTSSRYWFRPQYTKKESTIMGLSAFLYEKKGA**FGACIY*FY*DIFQ*SEK*YWC*YFSWK*SGEKI*WNSHQ…
	370	UN001003	1668	ATGAAATCGGGAGTTTTTCTCCTTCTTCCTCTCGCTTCTCCCGATTTCTCTCTTGTCCACAGCAGCAGCAACTACAATGGCACTAATAGTAGCATTNNNNAGGAGGACGAGGAGGAAGAACAGGGTTCGTCTCGGCCACAGCAACTGTTCCCATTCCAGAATCATNNCGAGACGTGCTCCGTTTACTTCCTCCGCTCCAACTCGTCCATCCCGCCTGATTGCAGCCGGGCTCCCGGAAAATCGAGATCCCTGCGCCTTCGGATTGTCGGGAAGACTCTCGCCGATGTGAAATCGGATCCGTACGATGTTGCCGACTCGGCGCCGGAGTCGGTCAGTTTCCCGGAAGGCCGAAGCGATTTGATTGCTCCGCCGCCGGAGGAGGAAGAGGAACTGCGGCGG…	556	MKSGVFLLLPLASPDFSLVHSSSNYNGTNSSIXXEDEEEEQGSSRPQQLFPFQNHXETCSVYFLRSNSSIPPDCSRAPGKSRSLRLRIVGKTLADVKSDPYDVADSAPESVSFPEGRSDLIAPPPEEEEELRRRGAIPWWEQLPKRWLIVFLCFSAFLLCNMDRVNMSIAILPMSAEYNWNPATVGLIQSSFFWGYLLTQIAGGIWADTVGGKLVLGFGVIWWSVATVLTPVAAKLGLPFLLVTRAFMGVGEGVAMPAMNNILSKWVPVSERSRSLALVYSGMYLGSVTGLAFSPLLIHKFGWPSVFYSFGSLGTVWFAIWLSKAHSSPLEDPELKLEEKKLIIGKSVSKEPVKTIPWRLILSKAPVWALIVSHFCHNWGTFILLTWMPTYYNQVLKFN…
	371	UN001008	5484	ATGGATGAATCATCATCTAATGGGCATCGATTTAGAAAAATTCCACGTCAATCCCTGGCTTCGAATCTGGAGTTGGACCCATTGCTTGGTGAGAATTTGGACCAGTGGCCACATCTGAATGAACTGGTTCAGTGCTACAAGGCTGATTGGGTAAAGGATGAAAGCAAGTATGGTCACTATGAAAGCATTGGTTCTATGTCATTTCAAAGTCAGATTTTTGAAGGCCCTGATACTGACTTAGAAACAGAAATCCGTCTTGCTAGTGCTAGGCATTCCAAGACTGAGGATGCTGTAGATGACGATATTCCAAGCACCTCAGGAAGGCAGTCAACAGAGCATTTTGGTGAATCTCCATTGCCTGCTTATGAGCCAGCTTTTGACTGGGAAAATGAGAGGTCC…	1828	MDESSSNGHRFRKIPRQSLASNLELDPLLGENLDQWPHLNELVQCYKADWVKDESKYGHYESIGSMSFQSQIFEGPDTDLETEIRLASARHSKTEDAVDDDIPSTSGRQSTEHFGESPLPAYEPAFDWENERSMIFGQRVPESHPTQYGRLKISVKVLSLSFQAGLVEPFYGTICLYNRERREKMSEDFYFHELPSEMQNAKVSPELRGIFSLDAPSASVCLLIQLEKPATEDGGVTPSVYSRKEPVHLTEREKQKLQVWSRIMPYREAFAWAVVPLFESSGVAAGGVSSPSSPLAPSMSSSQESVVESLAKLTLDGKLAHYSSGSSIVVEISNLNKVKESYTEDSLQDPKRKVHKPVKGVLKLEVEKIQIGHFDLDNMSESGSVTNDSVDAGDRTIDS…
	372	UN001012	5325	CAGTGATCGACGAGGTCTGCTCGCAGACCTCCAATGGCATCTCTCTCACACATCTTTGGCCGAGAATTCAAAAAAATCTCTCCTCAGCTGGCCTTCATCTCTGCAATGGCGTCAAGCAAGCGATCTGGAACCGAATTCTCACCACTCCAGGCCTCAATTTCCAAGCTGGAGGCTCTTCTTTAGGTTCTGTCGACCCTTCGATTCAATCGGTCGAAGAATCCGAGCGTCTAGGGCTGAAGATTGTTGCGGCAGATCATCTGAGGGATAGTTTTTTAGGGCTCTATGATCTGAAGGAAGCGAACTCGGATTTGTCGGCTTTACATAGGCAAGCTCTTGATCGGCTCGCGGCCGCCAGAACAAATGGAATTACACAGAGTCAACTTGCGAAGGAACTGGGAG…	1775	Q*STRSARRPPMASLSHIFGREFKKISPQLAFISAMASSKRSGTEFSPLQASISKLEALL*VLSTLRFNRSKNPSV*G*RLLRQII*GIVF*GSMI*RKRTRICRLYIGKLLIGSRPPEQMELHRVNLRRNWELKEIKFST**GALNVVS*L*GNLLL*EQKKLA*RERTK*KTILLLRPI*FIYIVLQNI*D*VPNRELRLQDQMRKYLP*F*GK*IXQWKIFLKNVAKKMCS*GIIYQQ*KLFVKNLKKQVTRSLLYLILNRLLAIGRVLVIEPGEISVTG*KMLAWWKNSMQKSTKKLSPAYAY*RSLIHKICNLRFQRVHMMILV*TNWSNVAKGAK*PMSLLNFP*STNYTI*LMLQDPKE*LLMRFAKDLELATRDITTDLVLCSKGLDSNSS…
	373	UN001017	3549	ATGTTGACCATGTGGCTTGTTCTTAGCAACCATGTTTTCAGGCTTGATTTGCAAACTTCTATGCAGATACTTGGTTTGGACATCTGTGTTGATATAATAGTAGGCAATGAGATGAGAAGGGGAATTTCTGGTGGACAAAAGAAGCGTTTGACTACTGGAGAGATGTTGGTTGGACCAGCAAAAGCTCTCTTCATGGATGAAATATCAACTGGGCTAGACAGTTCCACCACCTTCCAGATTGTCAAGTTCATGCGACAAATGGTTCATGTTATGGATGGAACCATGCTCATATCGCTTCTGCAACCTGCACCTGAGACATTTGATCTTTTTGATGACATCATCCTACTTTCAGAGGGTCAGATTGCCTACCAAGGTCCTCGTGAGAGCATCCTCGATTTC…	1183	MLTMWLVLSNHVFRLDLQTSMQILGLDICVDIIVGNEMRRGISGGQKKRLTTGEMLVGPAKALFMDEISTGLDSSTTFQIVKFMRQMVHVMDGTMLISLLQPAPETFDLFDDIILLSEGQIAYQGPRESILDFFEFMGFKCPERKGVADFLQEVTSKKDQEQYWFDKNKPYRYITVSEFAQCFNSFHVGQQLAEELKTPYDKARAHPAALATEKYGISNWELFKACFSREWLLMKRNSFVYIFKTTQITIMSTITMTVFLRTQMGHKTIVDGGKYYGALFFGLVNVMFNGMAELAMTVYRLPVFYKQRDFLFYPPWAFGLPIWILRIPLSLLESGIWVILTYYVVGFAPPASRFFRQFLVFFCTHQMALALFRFIAAAGRTMVVANTFGTFTLLVIFVF…
	374	UN001019	3813	ATTTTACAGATGATTTGCAAAAGTTGCTCGCATGTAATGCTTCGGGAGCAGGATAAGCGCATATTTGAGAAGAAGCTGCTAAATCCAGACCTGTCGTATTTAGCAAAGAAGTCGTTGCACGGCCAAATTTTAGGTAAAGCAAAAAAACTGGCAAAATGTCCCAACTGTGATGCTCCTAGTGGAGGCGTTAAGAAAGGTCAAGGACTACTAAAGATACTGCATGACCCATGCAAAGGAAAAAAACCAGACGCTGTCATGAGTGATGCGCTAAACGAGTTATTGCTGGCGACAGAAAATAATCGCGAACTTCAACAAACGTTAACATCTCACAACCAAGTAGAGGAACTAAATCCATTAACAGTATTGGAATTATTTAAAAGTATACCGAAAAGTGATATA…	1271	ILQMICKSCSHVMLREQDKRIFEKKLLNPDLSYLAKKSLHGQILGKAKKLAKCPNCDAPSGGVKKGQGLLKILHDPCKGKKPDAVMSDALNELLLATENNRELQQTLTSHNQVEELNPLTVLELFKSIPKSDIPLLGMTSGYASPANLIVTRIFVPPVCIRPSVLSEVKAGTTEDDLTMKQSEILLINDVIQKHMTGGGKIELIQEDWDFLQLHVALYFHSELSGIPLNMAPKKMTRGIVQRLKGKQGRFRGNLSGKRVDFSGRTVISPDPNLMIHQVGVPERVAKILTYPERVNPANIQKMKELVKNGTQKHPGANYVQQRGSTFKKYLAYGNRDKVAHDLMCGDIVERHLCDGDIVLFNRQPSLHKMSIMCHQAKVQPQRTFRFNECACTPYNADFD…
	375	UN001022	1122	TTGTCCACGGTTAGCCTACGTCCACGCGGTTTGACCAATCCCTCCAACTATTGCTACATAAATTCCATCCTGCAAGCGTTGCTGGGCTGTGCGCCATTCTACAACTTGATTCGTTCCATACCCAAACAGGCAGCAGCGCTGTCAGAAGTGCGCACTCCCACTGTCAATGCGCTCATTTCGTTCGTGTCGCAATTGTCCACGTTGCCATCGGGGCTACGTCTGCGTACAAATAAGGGACCCAAAGGCAAAGACGAATTGGGTAGCGAGTTGCAGTGCGATTCCGCTTTCGAACCAATCGAGATCTATCGCTTGTGGGCCAATAGCCGTGAGGAATATGTGGAGGGGCGCCAAGAGGATGCCGAAGAATTTTTAAGCTATGTGCTCAATAAACTGAATGAT…	374	LSTVSLRPRGLTNPSNYCYINSILQALLGCAPFYNLIRSIPKQAAALSEVRTPTVNALISFVSQLSTLPSGLRLRTNKGPKGKDELGSELQCDSAFEPIEIYRLWANSREEYVEGRQEDAEEFLSYVLNKLNDEMLEVIKLVAKPNAIQNGRNEVSESEDGDEWQMICNNRNKGSVTRQTDFGRTPLSDIFRGELRSRLQREGEHSTDDIQPFFTLQLNIEKAASVKEALEILVGRDQLEGVTGSKTKQEVVAWQQMTLEKLPIILILHLKWFDYRSDGCTKILKKVEFPIDLKIDAKILASKKYSMKQRAYRLFAVVYHDGKEATKGHYITDVYHTGYNSWLRYNDSSVKPVSENEVLYPKTPRVPYLLYYRR
	376	UN001028	546	ATTGACGAAGATGATGCGGGGGTGGAAACCAATGATGGATTGATGTTAAATGTCCGAGACATTGATGCCTATTGGCTTCAGAGGAAGATTTCTCAGGCATATGAAAAGATTGATCCACAGCATTGCCAAAAACTTGCGGAGGATGTGCTTAAGATCCTCACTGAAGGCGGCGATGATAGCGATGTTGAAAATCGGCTGGTAATGTTGCTTAACTATGACAAGTTAGAACNTATTAAATTATTTTTGATGAGGCGGCTTAACATAATTTGGTGTACACGTCTAGCAAGGGCAGAAGACCAAGAACAGAGGAATAAAATTGAGGAAGAAATGATGGGACGAGGCTNNTTAGCTGCGGTTTTGAAGCAGCTGCACGCTACAAGGGCGGCTCGTAAGGAGAGC…	182	IDEDDAGVETNDGLMLNVRDIDAYWLQRKISQAYEKIDPQHCQKLAEDVLKILTEGGDDSDVENRLVMLLNYDKLEXIKLFLMRRLNIIWCTRLARAEDQEQRNKIEEEMMGRGXLAAVLKQLHATRAARKESQKNLDKSIREEAKLLKDESGGDGDRDRRVVDREVENRWSEGRLQLLDLN
	377	UN001033	1569	ATGGCTGCTGCACTTGAAGATGCAAGTGACGTGGAGAATCTATACGAATATAGCGAAAGACTCAACGAGGCAAAAGACAAATCCGCGCATTTGGGAGATTACGAGGGGATAATCATGGCAGTGAAGGGAAGCATGAAGGCGAAGCAATTGGCGGCACAGCTAATCCCGAGGTTCTTCAAGTTCTTCCCCAGCCTATCGAAGAAAGCCTTCTATGCTCACTTGGATTTGTGTGGGGAGGAAGAGCTTGGGATAAGAGTACAAGCAATTCGCGGGCTTCCCCTTCTTGGCAAGGATACACCAGAGTATGTTCCTAAGACTGTGGATGTTCTCGGGCAACTTCTTTATACTGCTGAGGAAAATGTGGAGCGTGACGCGGTGCACAAAGCTCTAATGTCTCTT…	523	MAAALEDASDVENLYEYSERLNEAKDKSAHLGDYEGIIMAVKGSMKAKQLAAQLIPRFFKFFPSLSKKAFYAHLDLCGEEELGIRVQAIRGLPLLGKDTPEYVPKTVDVLGQLLYTAEENVERDAVHKALMSLLRQDVKASLTTLFHDVVTSEEHIREKVLNFIKDKVFPLKAELLKPQEQMERHVTDLVKKSLQDVTGAEFKMFMDFLKSLSIFGEKAPQEHVQELIEIIEGQADLDAQFNVSDVDHIDRLMSCMHMAVPFFLRGASNSKFLNYLNRHILPVFDKIPEERKIDLLKSVAESSPYTTPHDSRQLLPSVVQLLKKCMPQRKAEDMNFTFVECLLYTFHHLAHKTPNATNSLCGYKIVTGQPSDRLGEDFSDNYKDFTHRLTNVEDLARSA…
	378	UN001044	1650	GGCGAGAGCCGTTTCGTGCCAGATAAGTCTTCCGATCTCATCTCCGACGGAATCCGCCATGTCCGGCAACCTTCGCTTCTCCTTCTCGAGCGTCCATCTTCTTCTTCTGATACCTGCGAGCAGACGTACGGTTTCCTTCCCTGCACGACCACCATTTGGGGTAACCTCTTCCTCATGCTGGTCTACGGATACCTGATGTTCATGGCCGCCAAGTATCTCTCCTCAGGGAGCGAGCTCCTCCTCGAGATCCTCGGCCCTGGACTCATCGGCGGCCTCTTCCTCCCCATCCTCGGCGCTCTTCCCGACGCTTTGCTCATTCTCGTATCTGGACTCTCTGGAAGTAAAGAGACCGCTCAAAAACAGGTTCTGATTGGAATGGGCTTGCTTGCTGGGTCAACC…	550	GESRFVPDKSSDLISDGIRHVRQPSLLLLERPSSSSDTCEQTYGFLPCTTTIWGNLFLMLVYGYLMFMAAKYLSSGSELLLEILGPGLIGGLFLPILGALPDALLILVSGLSGSKETAQKQVLIGMGLLAGSTVMLLTLLWGSCVVVGKCDLVNSTSFDSQDSKWCSLTGSGVTTDAPTGRASRIMIISVIPFIVVQLPKVFHISSGSRIAVLISLILAVAFLISYCLYQVVEPWIQKRRVEYVKRKHIMSGFLRHIHKTAMGRLLDENGKLNEPVIEKLFHRLDVNHDGHVSSQELTALIIGIDFLNIDLDEEDAVDKVMDDFDTSGDRLIDLKEFFNGISRWLEEAKRFVVQGGSSTKKYDDFHMKTWEEYYDMADSHDEIADGVETTTRVSIKAGL…
	379	UN001046	3717	TTAAGCTTGCGTGATCCTGCTGGTAATCGGCTCACATTGGTTTATCCTTTCGGCAAAATGTATCGCATTGAATTGCCACAATTCAATGAAACAAAATTCATTTCACGCTGCATTGGTACACTACGACGCATCTTAAACAAAGAACAATTCGTGCAGCTAATCACTCGTTGGTATGGAGCGCGTAATCCGCCTGGATCACGTGATTATAGTATTGAACAGGAGTGGCACATTTTTAGAAACGTGCTGACCGGCTTAATGGGCTGCGGCGCAGCTACGCATGAAACCACTACCAATGCATCGATGTCTAGCAATGCAGAGGAGCCGAAGAAGCGACGTAAGAACGATGAAATCACTGAAGGTACCGATGAGGATTGGGAATTCATGTTAGCCGTACTCAAT…	1239	LSLRDPAGNRLTLVYPFGKMYRIELPQFNETKFISRCIGTLRRILNKEQFVQLITRWYGARNPPGSRDYSIEQEWHIFRNVLTGLMGCGAATHETTTNASMSSNAEEPKKRRKNDEITEGTDEDWEFMLAVLNEDGSGGCVRDNMKMETEQGTATAGNVDANACLFNSIPAIFYGLHLLYEDFKLDETMHDCLPYLAKFLQQFAVDMQLTTYIFHYTLDFPYLVHCTTKLCQLTEEHAARMAYKELLQVPAPSVYRQLEHILKGKDALQYTFVEGLNDMSRNVLQVVSLIMHGTEKIKDWIKPLEFANSVQSYYPKRPKRFISTIVPRAEQVIQMLINMEITRADIARLPVALHLIIAECLEHARLTPPIGCSAATYELILRTELVAHALLQDDSPTSA…
	380	UN001047	3012	CGCGCGCGCACCGTCCATTTGGGCCGTGCGACTACAGAAAAATTCCCACCGAACGAGATACGCAATCAAAAATACAATGTGATCACGTTCCTGCCGCTCGTGCTCTTCGAGCAGTTCCGTTTCTTTTTAAATCTCTATTTTCTGTTGATGGCATTGTCACAATTCATACCCGACATACGCATTGGCTATCCATACACCTATTGGGGCCCTCTCAGTTTCGTGCTAATGGTGACGATCGGTCGTGAAGCGGTCGACGATTTGCGGCGACATCAACGTGATCACGAGGTGAATTCACAGAAATACAAGAGGCTAACGGTAAACGAGACGCCAGGGTACGAGATGGTGCCCTCCTCGAAGCTGAAAGTAGGCGATATGATAATTGTGGAGAAAAACGAGCGG…	1004	RARTVHLGRATTEKFPPNEIRNQKYNVITFLPLVLFEQFRFFLNLYFLLMALSQFIPDIRIGYPYTYWGPLSFVLMVTIGREAVDDLRRHQRDHEVNSQKYKRLTVNETPGYEMVPSSKLKVGDMIIVEKNERVPADLVLLRTSDKSGSVFVRTDQLDGETDWKLRLAVPLTQKLNKDSDLFHIDASVYIEKPQNDIHSFIGTFSMDGGEETGLNVENTLWANTVVAAGTATGIVIYTGCETRSVMNNSQPRSKVGLLDMEINGLTKVLFCAVLGLSLVMMMLKGFSGPWYRYMFRFVLLFSYIIPISLRVNLDMGKAFYSWQMQNDPEIQGTVVRSTTIPEELGRISYVLTDKTGTLTQNEMVFKKIHLGIVSHDNDTFHHIGQIIQTLAPTILAQSA…
	381	UN001055	1728	ATGAAGGTCTCTGCTTTATTAACTTCAGCAGGAATCAATATAGGCATCTGTGCACTCCTCTTATGTCTGTATTCCATCTTGAGAAAACAGCCAGGCAATGCCCATGTATACTTTGGCCGAAAGCTTGCTCGGGATAATTACCATCGTCGAGATCCATTCATCTATGAGAGATTAGTACCTTCTATCGGCTGGATATTGAAAGCATGGGTATCGACAGAGAACGATATCATGGCAGATGCTGGCTTGGATTCTGTGGTCTTTCTCAGGCTGCTTGTCTTCAGTATACGGATCTTCTCCATTGCTGCTGTAATTTGCATGTTCTTAGTGCTTCCATTGAATTATTATGGACAAGAGATGGAACATAAGCACATTCCTAAAGAATCGCTGGAGGTGTTTACC…	576	MKVSALLTSAGINIGICALLLCLYSILRKQPGNAHVYFGRKLARDNYHRRDPFIYERLVPSIGWILKAWVSTENDIMADAGLDSVVFLRLLVFSIRIFSIAAVICMFLVLPLNYYGQEMEHKHIPKESLEVFTIENVKQGSEWLWAHCLALYIISISACILLYFEYKRISKLRLVHITRSPSNLSHFAILVRAIPWSLEEPFTVSVKNFFMKYHASSYLSHQMVYRTGKVEKIMKDAKKIYKKLVYLTPACMDQKYRASRVRCGLCGGTSTSFHLYSNELQLAEKKPGLDHLDSIKEKVLQTSNPMLWVTDLAPEPDDVKWSNLWIPYKQLWLRRIATLLASIVFMFLFLIPVTFVQGLSQLEQLQQMFPFLRSILRKPFVSQVATGYLPSVVLLLFLY…
	382	UN001057	1077	TCAAAGCTTCTTCACATCCCTCAGGCAGCTCTCCCGTCTACCTACCTAGGAGTTCCAATTTTCCTGGGAACTTCCAAACACTCTCATTTCAATCAGATCCTGGACTCTTTTAGGTCCAGATCGGCATGTTGGAAATCCAAATGCCTATCCTTTGCTGGTAGACTTATTCTGGTAATTAAACATGTGCTCTCATCTATCCCTTTTCACATTTCTCTTGCTATCTAAATCCCCAGCAAAACCTGTCTTCAGATGGAGCGTCTGATGCGGAGCTTCCTTTGGTCAGCTAGCCCAGAGAAGTCTAGTAGCCTGGTAAATTGGGGTTTGGTTTGTTTGCCTGAATCAGAAGGAGGCCTTAGTCTGCGCAGAGTTAAGGTTTTCAATGAGGCTTGCATGGTGAAA…	359	SKLLHIPQAALPSTYLGVPIFLGTSKHSHFNQILDSFRSRSACWKSKCLSFAGRLILVIKHVLSSIPFHISLAI*IPSKTCLQMERLMRSFLWSASPEKSSSLVNWGLVCLPESEGGLSLRRVKVFNEACMVKLGWFTVFSDFLWAQWFRARYFRRSSIWFPGTPRGGSCI*KRIRPLANYLQSGSSWKIGNGLSISSWFDNWLGMDPIAPRFPNIQFSDKDRLADIIHNNSWRVPPHFPAELHDFLLQSTSQILLEGSSVTDSLLCQGNLTGTLSFKEAWNLLRSSQAGVNWLGPVWNKLMNPRLACFSWRLLHRKPPTDLWAKQRGWAIASRCYLCLSNEEDNLHLFFYCPLALQLW
	383	UN001060	4971	ATGGCTGCTGCTAATGCTCCAATCACGATGAAAGAGGCTTTGACGCTGTCGAGTCTTGGGATAAATCCACAATTCATCACGTTTACTCATGTTACGATGGAATCTGAAAAGTACATCTGCGTCCGAGAGACTGCGCCGCAGAACAGCGTTGTGATCATCGACATGAACATGCCAATGCAGCCATTGAGAAGGCCGATCACCGCAGATTCGGCCTTGATGAATCCGAACACTAGAATTCTCGCACTGAAAGCTCAACTTTCTGGAACTACTCAGGATCACCTGCAAATTTTCAATATTGAGATGAAGGCAAAGATGAAATCGCATCAGATGCCTGAGCAGGTTGTCTTTTGGAAGTGGATTACTCCAAAGATGTTGGGGCTAGTTACACAAACCTCTGTT…	1657	MAAANAPITMKEALTLSSLGINPQFITFTHVTMESEKYICVRETAPQNSVVIIDMNMPMQPLRRPITADSALMNPNTRILALKAQLSGTTQDHLQIFNIEMKAKMKSHQMPEQVVFWKWITPKMLGLVTQTSVYHWSIEGDSEPVKMFDRTANLANNQIINYRCDPSEKWLVLIGIAPGAPERPQLVKGNMQLFSVDQKRSQALEAHAASFASFKVAGNENPSLLICFASKTINAGQITSKLHVIELGAQPGKPGFTKKQADLFFPPDFGDDFPVAMQISNKYSLIYVITKLGLLFVYDLETATAVYRNRISPDPIFLTAEASSLGGFYAVNRRGQVLLATINEVTLVPFVSGQLNNLELAINLAKRGNLPGAENLVVQRFQELFSQTKYKEAAELAAE…
	384	UN001069	4887	CAGGAGTCGATCGTCGTGGAGCGGCGGAACGGGCACTCTGCGTTCTGCCGGTGGACGGTGGCGCAGTTCCCGAAGATCAAAGCCCGGGCGCTGTGGAGCCGCTACTTCGACGTCGGCGGCTACGACTGCCGGCTCCTGATCTACCCTAAGGGCGATTCTCAGGCCCTACCAGGCTATCTCTCCGTCTACCTCCAGGTCATGGATCCTCGCAGCGGCTGCGGCTCCTCCTCCTCCAAGTGGGACTGCTTCGCCTCCTACCGCCTCTCGATCTCCAACCACACGGAGGAATCCAAGTCCATCCACAGAGACTCCTGGCATCGCTTCTCCGCCAAGAAGAAATCTCACGGATGGTGCGATTTCACCCCCTCCTCTGCTGTCCTCGATCCTAAGGCCGGATTC…	1629	QESIVVERRNGHSAFCRWTVAQFPKIKARALWSRYFDVGGYDCRLLIYPKGDSQALPGYLSVYLQVMDPRSGCGSSSSKWDCFASYRLSISNHTEESKSIHRDSWHRFSAKKKSHGWCDFTPSSAVLDPKAGFLLNDSSLVVTADILVLHESLSFSRDSNSNSDAQPSVVALGPAADVLTGKFTWKVHNFSLFKDMIKTQKIMSPVFPAGECNLRISVYQSSVNGVDFLSMCLESKDTEKSAAGSAPASPDRSCWCLFRMSVLNQRQGLNHMHRDSYGRFAADNKSGDNTSLGWNDYMKMADFVGQDAGFLVDDTAVFSASFHVIKESSSFSKNAGLIGGGRGGARKLDGHLGKFTWRIENFTRLKDLLKKRKITGLCVKSRRFQIGNRDCRLIVYPRG…
	385	UN001072	3957	AATGGACAGAAATCTCCTGCACTTGACTCTTGTATCTTTTCAAAAAACAAAGAAACTCCTTTACAATCTCAGACCGAGGAATCAGATATTATGGAGGATGATGTAAAAGTCTGCGATATCTGTGGAGATGCAGGGCGGGAAGAGATGCTTGCTATTTGCAGCAAATGCAGTGATGGTGCAGAGCACACCTATTGCATGCGAATCATGCTTGATAAAGTTCCAGAAGGTGATTGGCTATGCGAAGAATGCCAGCTCAAGGAGGATGATGAAAAGCAGAAACTGGATAGAACTAAAATAATAACAGCAACTCCAAACGAGACACCATCGAAGGAAAGCTTTGAAGGCATATTAAACTCTAAGCTTCTGCCCAAGTTGGACACCAAATCAGAAGAAGCGGAG…	1319	NGQKSPALDSCIFSKNKETPLQSQTEESDIMEDDVKVCDICGDAGREEMLAICSKCSDGAEHTYCMRIMLDKVPEGDWLCEECQLKEDDEKQKLDRTKIITATPNETPSKESFEGILNSKLLPKLDTKSEEAELSNASKVSASSLLSAKRHADNFEDSSSKSRKLAVDTSPGAPRIGSPGRKPALSRESSFKTMDVDKVKKANLVPSSGSQSANNSKEVARSPSTAGPDSSRVQAQLQLPRGLLSRSATFNNASSKPKVKQLVEDAFQKHRSSRESSSSATRKEGLITKSMSFRTPNSGRSTMIESKAKMPSPNVSRLEDPRGLKQAKGQNILERKNSFKMDRHVVGSLAGGTSMSLPKANPKNVFRGESTSSITSVKNSFDPNIKQREGKLNSSNSSL…
	386	UN001075	1071	AATTGGGAGAAGTGTCATTTCATGGTGAAAAGAGGAATTGTCCTGGGCCATGTTATTTCTGAGAACGGTATCGAGGTCGACAAGGCTAAAATTGATCTCATTTCCAACCTGCCACTGCCAAAAACAGTGAAGAATATTAGATCTTTCTTGGGTCATGCAGGTTTTTATAGACGGTTCATTAAGAATTTTAGCAAGATAGCTGCACCCTTGTGCAATCTGCTATCAAAGGATGTGCCTTTTGTCTTCAATGAACCTTGCCTACAAGCATTTGAACAATTGAAAAAGGAGTTGATCTCTACCCCAATAATAAAGCCACCTGATTGGACAATTCCCTTCGAACTCATGTGTGATGCTTCTGACCATGCTCTTGGGGCTGTGCTAGGACAGAGAGTGAACAAA…	357	NWEKCHFMVKRGIVLGHVISENGIEVDKAKIDLISNLPLPKTVKNIRSFLGHAGFYRRFIKNFSKIAAPLCNLLSKDVPFVFNEPCLQAFEQLKKELISTPIIKPPDWTIPFELMCDASDHALGAVLGQRVNKLPHVIYYASRTLNDA*LNYTTTEKELLAVVFALEKFRPYLIGSKVVVYTDHSALRYLLMKKEAKARLIRWILLLQEFDLEIRDKKGSENVVADHLSRLPTNPEHESIPLSESFPDEHLLSVSHFPWFADIVNYLVTGQMPDHWSKHDRSKFLSEVKHFFFDDPYLFKYCPDQIIR*CIPEEDYLSVISFCHDHACGGHFSSKKTAAKVLQCGFYWPTLFKDCHT
	387	UN001078	4548	ATGGACCAGAGGCGCCATTCAAAGAACGGCTTATCCCTCACCAATCTCTTCAATCTAGAGCCTTTGGTGAACTATCAACTCCCCCAACACGATGATGGTTTTGGTAGTTATGGGAATAGTAGTCAGGACGAGAGCAGAGGTAGCCAAGGCCGGGATGCAATGGCAGNNGCCTGACTCGACGGAAACGTTCCCACCTGGAAGCCGAGGCAGCTTCTGATTCATCCACTCGGCGGGACATGGATAGCAATGACGAGGAAGATGGTAGTGGCAGGGATTATGGGACTCACATATCAGAGGAACGATACAGGTCGATGCTTGGGGAGCATGTGCAGAAGTACAGACGGGTGGCGTTTAAGGATGCGTCTTCCACCCGTAAAGTAATGCCGTCGAGGAAACGCA…	1516	MDQRRHSKNGLSLTNLFNLEPLVNYQLPQHDDGFGSYGNSSQDESRGSQGRDAMAXA*LDGNVPTWKPRQLLIHPLGGTWIAMTRKMVVAGIMGLTYQRNDTGRCLGSMCRSTDGWRLRMRLPPVK*CRRGNAVMGLRKVGXXGESXLHGVDTTPEFLRDVSPLKRGGYNNTDFGSEYASDRFLSSLDSAYLDIGEGITYQIPPTYDKLVTSLRLPSFMDVRVEEYFLKGTLDLGSLAAMMTADRKRGSRSHYGMGEPQPQYESLQARLKAMSASNSVQKFSLQVCDIGSDSSIPEGAAGGTQRLIMSESGTLQIYYVKVLEKGDTYEIIQRSLPKKVPVKKDPSVIEKEERDKIGKAWVNIARRDIPKHHRVFTNFHKKQLADAKRCSETCQREVKNK…
	388	UN001082	5502	GACACCTTCCTTGGGATGAGTAGATTAACAAACTTTATAAAGTTCCAAGGGGCAGTAATTGAACTCCTCCAAATGGACATTGTCGATAATCAATTATCAGTTCCAACTGCTTCAGGAGCAACATTCACTGATAATCATGCTGAAAGCAAATCTTCAGGCACAAGAACTCCAGTTTTGACTGGGGAAGTTGGTGGGTTTTCGGGGAATTTGAAGCTAAGTATACCTTGGAAAAATGGGTCTTTAGACATTAACAAGGTGGATGCAGATGTTCATATTGATCCTCTTAAATTTAAGCTTCAGCCAAGCACAATAAACTGGATCATTTGCTCATGGGAGTGTCTCAAAGATGTAGGTGTGGACAGGAGTGATATGCAACACAAGACAGCTGAATCTGTTTGT…	1834	DTFLGMSRLTNFIKFQGAVIELLQMDIVDNQLSVPTASGATFTDNHAESKSSGTRTPVLTGEVGGFSGNLKLSIPWKNGSLDINKVDADVHIDPLKFKLQPSTINWIICSWECLKDVGVDRSDMQHKTAESVCHNFSSCYQSFTQGSALTATSRVIPSSEKLSCGSCSLSSHALESDYLLQGAHVIADWVPLSNNRCQKDGVEPEPDYGASIDQFFECFDGMRSSHAAALGHSGIWNWTCSVFSAITAASSLAAGSVHISPEQHHVETILRATVAGISVILSFHDENRGQSHDSQGGDGNTDCLDGTKNESCLTSDVVMSSTGSAVPVYSCMSSEQSTKVNSASVHYLEAMCRELVLSLQVCHKSIMVEAIIKHFEVDDCFTNGNIARDFGFSGCEQSV…
	389	UN001084	2289	GTGATTCCGCCGCTGTCACGGCCTCCTGTTCCAACTATCCGTGGAGCTCCTCCAATTGTTACGCCTGTTGTCAGGCCAGTCATCCCTATTGTTCCGCCTACGGAGAAGCCACAAACAACAGTCTACGTTGGAAAGATAGCTGCAACTGTGGAAAATGATTTCCTGCTTTCCCTTCTTAGGCTCTGTGGACCAGTAAAGAGTTGGAAACGCGCTCAAGATCCTAGCGATGGGACTCCAAGAGGCTTTGGATTTTGCGAGTTTGAGTCTGCTGAAGGCGTGCTTCGTGCACTGCGCCTGCTGAGTAAATTTAATGTCGATGGACAAGAGTTGGTGCTAAACGTTAATCAAGCTACAAGGGAATACCTAGAGCGCTACGTCGAAAAGAAAACTGAAAGAGAA…	763	VIPPLSRPPVPTIRGAPPIVTPVVRPVIPIVPPTEKPQTTVYVGKIAATVENDFLLSLLRLCGPVKSWKRAQDPSDGTPRGFGFCEFESAEGVLRALRLLSKFNVDGQELVLNVNQATREYLERYVEKKTEREKKLKEDGTEGDEKEGESAPGVEKHEPPKPSEEDTKKEDDSLDKENQDATLKFGIVTDEDREADKDALEKLTSMMEERIKTRPPPPPPPMPNPADGSTKSNSEVAAKSRDGDSDVDIMKSDAAEDRNDDETTSENKTSAEHDRPETSSSDKARRYDRRSRERDRERDLKREKERELERYERERERERVRRERDREMKIREAERLYKERVKEWESREREKEHQRTYDKDREKERERERRREIMDQEDESDDDDTRKRRRRSSAYEEKR…
	390	UN001090	627	CATGCCCGTCAAATTAACACTCTATCACACGGCGAAGTTGTGTGTGCCGTCACCATTTCGAATCCCACGAAGTATGTTTACACAGGCGGCAAGGGCTGCGTCAAAGTTTGGGACATCTCACAGCCGAATAATAAAAATCCAGTCAGCCAATTAGACTGTCTGCAACGTGACAATTATATACGCTCCGTGAAATTACTGCCCGATGGTCGTACGTTGATTGTGGGCGGCGAGGCGTCCAATCTCTCCATATGGGATTTGGCCAGTCCGACGCCACGCATTAAAGCCGAACTGACATCGGCAGCGCCGGCTTGTTATGCGTTAGCCATCAGTCCCGATTCAAAGGTGTGCTTCTCGTGTTGTAGTGATGGCAATATAGCTGTCTGGGATCTACACAATGAA…	209	HARQINTLSHGEVVCAVTISNPTKYVYTGGKGCVKVWDISQPNNKNPVSQLDCLQRDNYIRSVKLLPDGRTLIVGGEASNLSIWDLASPTPRIKAELTSAAPACYALAISPDSKVCFSCCSDGNIAVWDLHNEILVRQFQGHTDGASCIDISPDGSRLWTGGLDNTVRSWDLREGRQLQQHDFSSQIFSLGYCPTGEWLAVGMENSHVE
	391	UN001092	183	ATGACAAAAGAACGGGGCATAGGAGATAGAGGCGGAGTCTTGGCTGTAGTTAATGGTTTGACTAAGAGTAGCTGTAGGAATAAGAATAGGAGAGCAGTAGAGAATAGAAAGCGTCTTGTCAGAGCCTTCTTAGGAGCTGGAGCAGGAACACGAGATTGAGCTCTTGTTCGTTCGCTTGTTAGC	61	MTKERGIGDRGGVLAVVNGLTKSSCRNKNRRAVENRKRLVRAFLGAGAGTRD*ALVRSLVS
	392	UN001101	219	ATTCTTGCAAATGTGACCGAAATTANNCAGAATCAATTTCTTCACTTAAAGGAGCCTTTCTACAAATACAGCACAATGTGGAGGAGCATCTAATGATGCTATGTTCTGAAATTCTTTCCTTGAGGGGAGAGTTAATAGATTGCATTTGCACCTCAAGATTATGGCTTGAACGTATATCGTCCCAGATAATGGGGAAAGGCTTTTCTNATGTTTGTGGTG	73	ILANVTEIXQNQFLHLKEPFYKYSTMWRSI**CYVLKFFP*GES**IAFAPQDYGLNVYRPR*WGKAFLMFVV
	393	UN001106	2664	ATGGCTGAAGCCAAGGTCAGTCTGCCAGACGATCTCCTTTCCTCGAAATCGCCTGAGGATTCCTGGACTGGGAAAGATGATGCACCAGCAGGAAATGATGATGAAAAGTGGCTCATGGGGTTCCTTGATGATTCCAAAGATCAAGTAACATCTGAGAGCAGTATACCGTTATCTCCTCAATGGCTGTATGCTAAACCCAATGAGAGTAAGCCTGGCCTTCCTGCAGCACCAGGGGACATTCGGGCACCTACTCCGTTGACTCATGGAAACTCTCTGGATCCTGTTCAAAAAGAGGGGTGGCGCTTGGATGGATCTCTAGAGAAGAAAGAATGGCGAAGGAATGCTCCTGATATTGATAGCAGTCGCCGCTGGCGTGAAGAGGAGAGAGAGACTGGATTA…	888	MAEAKVSLPDDLLSSKSPEDSWTGKDDAPAGNDDEKWLMGFLDDSKDQVTSESSIPLSPQWLYAKPNESKPGLPAAPGDIRAPTPLTHGNSLDPVQKEGWRLDGSLEKKEWRRNAPDIDSSRRWREEERETGLLGRRDRRKEGDRENEYRKSDRRTDTSSIRETAENRPLPSSDRWHDVTSRNPGHETRRDSKWSSRWGPEDKEKVSRNDKRVDVEKEDAHSEKQTFISSNRAVSERESDSRDKWRPRHRQEAHSVGPTVYRAAPGFGLERGRLEGSNVGFAPGRGRSNIVGNISLGRPSFSGPIGAAPVERNELGRGKSVISADTFCYPRGKLLDIYRKQKLYLSFNNIPDGLEEVPPITISGSVEPLAFVAPGAEEEAILKDIGKGKLISSGAFYNS…
	394	UN001113	189	GAGTTAGGATTTTCCTTTACAGGTCTGTATGAAGGAGGTGCTTGGAAAGTGCGTGTGGAATTACCGGATGCTTACCCTTACAAGTCCCCCTCAATTGGCTTTGTCAATAGAATCTACCACCCCAACATTGATGAAATGTCAGGTTCAGTCTGCCTTGATGTTATCAACCAGACTTGGAGTCCTATGTTT	63	ELGFSFTGLYEGGAWKVRVELPDAYPYKSPSIGFVNRIYHPNIDEMSGSVCLDVINQTWSPMF
	395	UN001115	1566	AAGTACGAACTCCATAATGAAAATGGACGGAAGAGATCACGTGGTTGCCGTATTGATGATGATGACCTTTTGATTGCATCTATGATGAGAAATGAAGACTTGAGCTCCCAGACCAACATTAAGGACTCTCATTCAAAACCTGTGAGGAAACTCAAGAGTCAAAATGTTAGTTGCAAGTTGCTTGTAAGGACACCTCGAAAACGTGGAAAGAACTCGCATGGGAAGTGTAACTCGGGAGCAAAAATGGTACTGTCGTGGTTGATCGATGCTGGTTTTTTATCTGTGAATGATGTGATCCAGTACAGAAATCCAAAAGATAATGAAGTGATAAAATATGGATGGGTTAAAAGGGATGGAATCTTTTGCAAGTGTTGCAAAACGATGTTTTCTGTGTCCAAT…	522	KYELHNENGRKRSRGCRIDDDDLLIASMMRNEDLSSQTNIKDSHSKPVRKLKSQNVSCKLLVRTPRKRGKNSHGKCNSGAKMVLSWLIDAGFLSVNDVIQYRNPKDNEVIKYGWVKRDGIFCKCCKTMFSVSNFKGHAGCKPYRPCLNLFLESGKPFILCQLQAWSAEYMARKGAVQVEEADEQDQNDDACGLCGDGGELICCDNCPSTFHQACLSMQEVPQGSWYCPSCTCRSCGDVATGKETSTSLVTFKCFQCEHRYHKTCIIEKGICGGVLVSDKWFCDEKCQKVYVDLHSRVGVLNNISDGFSWTLLRCIVGDQKVNSAQKIAAMAECNTKLAVALSVVEESFLPMLDSRTGVDMIPHILYNRGSNFARLSYQGFYTVVLEKDDELISVASIRV…
	396	UN001125	4548	AAAATGAAGTCTGATTCAGCTCTTGATTATGCTATATTTCAGTTGTCACCAAAGCGTTCACGATGTGAGTTATTTGTGTCGGGAGGAGGAAAAACTGAGAAACTTGCTTCAGGGTTGGTGAAGCCATTTGTGTCAAATCTAAAGGTTGCAGAAGAACAGGTTGCTCAAGCAGTTCAGTCAATTAAACTAGAAGTTGGGAAACAAAAAGATGTGGGCAAATGGTTCACCAAAGGAACTCTTGAAAGGTTTGTTCGGTTTGTTAGTACGCCAGAGGTGTTGGAACTGGTGAATACATTTGATGCAGAGATGTCTCAATTGGAAGTTGCACGGAGAATTTATGCACAGGGAGCGGTCCGAGATCAGCATTCTGGGGAAAATGAGACAGGAGCTGCAGCAGCA…	1516	KMKSDSALDYAIFQLSPKRSRCELFVSGGGKTEKLASGLVKPFVSNLKVAEEQVAQAVQSIKLEVGKQKDVGKWFTKGTLERFVRFVSTPEVLELVNTFDAEMSQLEVARRIYAQGAVRDQHSGENETGAAAAADVTKKELLRAIDVRLVAVKQDLCAACARASAAGFNPDNVSELLLFADRFGAHRLKDACSNFISLCQRQPELVNSLKAIDDPAIRSSFGSDMSIDDTTEEMLSLKSIEPQQHRQHSYQCNQEQDTSRVSDLPKPAISQPKLSTSASFPACRPLREPSSECDEGRESELASKKDTEKAMDVSPPLSTQQPARRLSVQDRINMFENKQKEQSGSGSGVSKTIASGKVPDLRRLSSDISSSSAASSVVEKAVLRRWSGATDMSVEISGE…
	397	UN001128	1011	GCAGCACCCACCATGTCATTTGGCCTTAAAAGCCTCACAGAAACCTTCGTGATCGACGTCGAGAAGGCCGAAGGGAGGCCTCTCAATGTCCCTTTGACCGCCCCATTTACCATCGCCTCGTCGAGGCTCGACTCGGTCGGGAACGTGGCGATCCGGGTAGAACTCAGTAATGGGTGTGCTGGTTGGGGAGAGACTCCCATCCTACCGTCCGTTACAGCTGAGGATCAGATCACAGCGCTTGAGAAGGTAGGGGTGGCTTGCGCTGCGCTGAGGCGGGCAAGGGGAAGGACTTTGGGATCGGTTCTTGGAGAGTTGGGGGAGATCCTTCCTGGCCATGAATTTGCTTCCGTTAGAGCAGGAGTTGAGATGGCGCTGATCGATGCAGTTGCTAATAGCATA…	337	AAPTMSFGLKSLTETFVIDVEKAEGRPLNVPLTAPFTIASSRLDSVGNVAIRVELSNGCAGWGETPILPSVTAEDQITALEKVGVACAALRRARGRTLGSVLGELGEILPGHEFASVRAGVEMALIDAVANSIDVPLWRLFGGALDSITTDITIPIVSPAEAAELAANYRKQGFRTLKLKVGKDLRADIEVLKAIRVAHPDCSFILDANEGYTAKEAIEVLDKLHEMGVTPVLFEQPVQRDDWEGLHHVSHVAKNKYGISVAADESCRSLLDVQKIIRENLADVINIKIAKVGVLGALEMIELAKSNGITLMIGGMVETRIAMGFAGHLAAGLGCFR
	398	UN001134	4800	CAGCAGTGCGATGCCGCGACAACGGATCAGGGGTCAGTTGATGATCTCCCTGTAACGCACACCTCTCATACTCATTCTGACACCGAGAACTCGCTTGAATCCCACTCCAAAGATCGGCACGAGAAGTTAGGTGGTGTGGATGGCTTCGGCACAGGCGTCATGTATGATAAAGACCACTCCTTGGGTTCAATCACATGGAAGACTCTCAAGTGGACGCGGTCTGGTAGTTTTTCCTCTCGCTCCTCTGGTTTCGGCCATTCGATGGGTGCGAAGAGTAGTAGAGGGGATAACAATGACGCTGGGTTCGAGTTACTGGCTGGGAAAGAGACTCCAGTTCGGTCGTTGTCTGGGGACGGGGCCGAGGGTGCGATGACAGCTGCACGCGTTGAAGGTGCATGC…	1600	QQCDAATTDQGSVDDLPVTHTSHTHSDTENSLESHSKDRHEKLGGVDGFGTGVMYDKDHSLGSITWKTLKWTRSGSFSSRSSGFGHSMGAKSSRGDNNDAGFELLAGKETPVRSLSGDGAEGAMTAARVEGACPQKKQRLGWGQGLAKYEKEKVEGPEDAAGRGVLVHCYSNTKNVQNTGALISHDKSPKVSSALECMSPATPCSVACSSSSGLEERSNVKVTNSYNDMSHFSDSTSQGFQRCPEELFANMEHLELNPISNISFLLVGLLSSQDASSGDSDFVQSTALNKLFLLKTDILKLLEKTECDIDLFENELKSLDFKSETNATCPTVPESIQTVAILKPLEKQADSAPKLPVKEQLLCSDPFKANAEVEEDDIDSPGTVTSKRTELASLEYEIS…
	399	UN001135	4788	ATGGCGCAGAAGCTGCAGCAGCAGCTGAGAGAGGTCGGATCGAAGCTTGAGAGCCCTCCGACCTCCAAGGACGCCCTAATCAAGCTTTTGAAGCAAGCTGCAACTTATCTTGCCGAGGTGGAGCAATCTCCATCAGCGTCAATGATTGAGTCCATCAAGCCATGTCTTAATGCAATTGCCAAACCAGAGCTACTGAAGCATCAAGATAGGGATATTAAAGTCCTGGTTGCAACATGCATTTGTGAGATTACTCGTATTACGGCCCCAGAAGCACCTTACAGTGATGATGTTCTAAGGGATATTTTCAATTTGATTGTAGGCACTTTCAGTGGATTAGGTGATATCCACAGTCCATCATTTGGCAGGAGGGTCGTTATCTTAGAAACAGTTGCAAGATAT…	1596	MAQKLQQQLREVGSKLESPPTSKDALIKLLKQAATYLAEVEQSPSASMIESIKPCLNAIAKPELLKHQDRDIKVLVATCICEITRITAPEAPYSDDVLRDIFNLIVGTFSGLGDIHSPSFGRRVVILETVARYRSCVVMLDLECNDLVNEMFSTFFAVVSDYHPESVLTSMQTIMVLLLEESEDVQENLLLTLLSVLGRGKSDVSAAARRLAMNVLGHCAGKLESCMKQFLISSMSGDKSSLNSQLDYHEVIYDIYQCAPQILGGIIPYITGELLTDQIDVRMKAVKLLGDLFALPNNTISEIFRPLFSEFLKRLTDRVVEVRISVIEDVKKCLLSNPSRSEAPEIINALSDRLLDYDENVRKQVVAAVFDIACQTLKSVPADIVRLAAERLRDKSLIV…
	400	UN001140	5028	ATGGCTTTCATGGCCGTTCTCGAAACCGATCTGCGCGCCCTGTCCGTCGAAGCCCGCCGCAAGTTTCCCGCTGTCAAAGACGCCGCGGAGCACGCGATTTTGAAGCTTCGTTCCCTGTCAAACCCCAGCGAAATTGCACATAATGAGGATATATTGCGCATTTTTTTGATGGCTTGTGAGGTTAGATCAGTGAAGCTGAGTGTTATTGGGCTTTCATGTTTGCAAAAGCTTATATCTCACAATGCTGTCGCACCATCTGCTCTGAAGGAGATACTTTCAACTCTAAAGGAGCATGCTGAAATGGCGGATGAGAGTGTTCAACTGAAAACCTTGCAGACTATATTGATTATTTTCCAGTCTCATTTACATCCTGAAAATGAGGATAATGCGGCGAAGGCA…	1676	MAFMAVLETDLRALSVEARRKFPAVKDAAEHAILKLRSLSNPSEIAHNEDILRIFLMACEVRSVKLSVIGLSCLQKLISHNAVAPSALKEILSTLKEHAEMADESVQLKTLQTILIIFQSHLHPENEDNAAKALGICLRLLENNRSSDSVRNTAAATFRQAVALIFDHVVSAESLPSGKIGSGNQITRTSSVTDDVSRGINRSVSLESEFISGGPSSMQAGLTKTGKLGLRLLEDLTALAAGGSAVWLRVTCLQRTFALDILEFILSNYVAVFRTLVSYEQVLRHQICSLLMTSLRTNAELEGEAGEPSFRRLVLRSVAHVIRLYSLSLVTECEVFLSMLVKVTSIDLPLWHRILVLEVLRGFCVEVRTLRLLFQNFDMHPKNTNVVESMVKALARVVS…
	401	UN001149	2262	GTGTTTGCGGCGACCGCAAGTGGTGGTGTAAATCCCTGGTCCAGAGAATTTCAACTATTGCAGGAACGAAAAAGACTCTCAACGTGGGGAATTACTTCTTTTGAATTGCACAAGCCAAGTGGAAAAATAGTGTTTCCCTGCTTCAGTGATCTGTACCAATGCCTTGATACAGGATATAATACCAGCCCTCTTTTCCCTACACAATTGCGCACATGCCCCCAATGGGCTGCTTTGGATCCACAAATCTGCCCACAAAACTCGGACCTGATTGCATATATTAGTGGAAGCGATATATGGGTCACGCATACAGTCAGTGGCCATGAAGAGCGTTTGACTTTCGCGCACGATGGCCGTCGTTCTATTGCTGATGATCCTCTCAGCGCTGGTTCGCCATCACAC…	754	VFAATASGGVNPWSREFQLLQERKRLSTWGITSFELHKPSGKIVFPCFSDLYQCLDTGYNTSPLFPTQLRTCPQWAALDPQICPQNSDLIAYISGSDIWVTHTVSGHEERLTFAHDGRRSIADDPLSAGSPSHIMLEEFSRFQGYWWQPQSDDGVYRIVYEEVDESDVCLYTFPSSQAMPGEMEEYRFPRAGTANAKSKLKLVQFVLSESLQISDVCIKDLPYTLSVVFPWLEYIVRVGWTPDSNYVWMQGMNRKQQRLDVVLIPLDNFCETYTSSASSPSGSADHCWKSPYCRAVSPIQVIYSQTSDSWVNVHDLLYFLEITDTTVTFLWASEETGFRHLYLVTSSLNASARNGYKDTHTNANNFEMSSRTNSTSSATSGAMDMHTDFIDSVTLHPRI…
	402	UN001151	4338	ATGGAGGTGTTTATACTGGCCATCAATGTAGCAGTTTCTGCATTGTTCTTCCTTTGGGTTATAGTAGAATGTTTTATTGAGAGGAGGAGACATGTAGCATATGAAGAGGCAAGTCTGGAAACTACAGATGGAAAATCTATGGTCTGTGCAAAGATTACTGTCCTTTGTAATGTTTTAATCTGTATTTCCTACCTGGGTACTTTCACTTATGAGGTTTGTATGCTGAAAATGATCTCCTTGGACTTTGTTTTCCCGGCCATAACTTGGTTACCGATAACTGTGTTTACAATCCATTGCAAGAGAAAACCAGTTGGAGAAAACAACAGATGGCCTACAGTCCTTAAATTCTGGTGGATTCTTTTTGGTCTTTTCAATGGTTTCTGTATCTCAGTCTTTGTA…	1446	MEVFILAINVAVSALFFLWVIVECFIERRRHVAYEEASLETTDGKSMVCAKITVLCNVLICISYLGTFTYEVCMLKMISLDFVFPAITWLPITVFTIHCKRKPVGENNRWPTVLKFWWILFGLFNGFCISVFVINHFKWATLPQSFPMVNIADFICFPFCIFLCFNAIAKNAGNPRVELKRPLLRREEDDFNRDAFANAGMWSRLTFRWLNPLFEMGRIQKLKLDHVPSVPESESAEKAFCMLQEELCKQKTDACSLPNAIIHAIWRPLVINAVFAGINTLSSYLGPFLVANFVNFLSRKDDNSSHNYGYILSFFFFFAKTVESLSQRQWYFGAHRIGVRVRAAIMVAIYQKSLWSKYSDTTNGKIINMLNVDVERIGDFCWYIHGIWLLPIQVSLALI…
	403	UN001153	3159	ATGGAGAGCTTGGCACAACTGGAAGCCTTGTGTGAAAGGCTTTACAATTCACAGGATTCTGCTGAACGAGCTCATGCAGAGAGCACTTTGAAGTGCTTCTCTTTGAATACTGAATACATTTCACAATGCCAATACATTCTGGACAATGCTTTGACTCCTTATGCATTGATGTTGGCCAGTTCAAGCTTGCTGAAGCAAGTGACAGAGCACAGTCTTTCTCTGCAGCTCCGTCTTGATATCCGAAACTACCTGATAAATTATCTGGCCACCAGAGGACCTGAATTGCAGCCTTTTGTAACTGGATCTTTGATTCAACTCTTTTGTCGAGTGACAAAATTTGGATGGTTTGACGATGATAGATTCCGAGATGTGGTTAAAGAGTCGATGGACTTTTTGAGT…	1053	MESLAQLEALCERLYNSQDSAERAHAESTLKCFSLNTEYISQCQYILDNALTPYALMLASSSLLKQVTEHSLSLQLRLDIRNYLINYLATRGPELQPFVTGSLIQLFCRVTKFGWFDDDRFRDVVKESMDFLSQVSPDHYSIGLKILNQLVSEMNQPNPGLPLTHHRKVACHFRDQSLFQIFQISLTSLHQLKNDVASKLQELALSLSLKCLSFDFVGTSLDESSEEFGTVQIPSAWRPVLEDPSTLQIYFDYYAITKPPLSKEALECLVRLASVRRSLFTNDTERSKFLAHLMTGTKDILQTGQGLADHDNYHEYCRLLGRFKVNYQLSELVNVEGYSDWIRLVAEFTSKSLQSWQWASSSVYYLLGLWSRLVTSVPYLKADTPSLLDEYVPKITEGF…
	404	UN001155	5070	TTTCCTCTCTCAAAACAACCGCCCACACATCTTCTTCGCCTTCTTCGCTTTCGCTCTATCCCTAACTTCAAGGTTTTGCGAGCTGATTGTACGAGCAATGGAGGGTTGGGGACCGCGATGGATGCATTCTTGGGGATGGACGGTTCAGATTTGCCGGTGGAGATCTGCCAAACACGAGCTCTTCCTCCATCTCTCACTCTGCTGGATGCTGCCAGCAAGATCAAAGAGGCAGTTGAGCAGTTGAAGTTGAATCCTCCTCGTTCCAGGAGTGGCTTTTTAAGGTTTCAGGTTTCAGTGCCTCCAAGCCTAAAAGCTTTGGATTGGTTATCTTCTCAAACTGAGTCTTCAGTAGCATTTCCTCAGTTTTATCTTTCTGTAAAGCACTTTGAGAACCAACCT…	1690	FPLSKQPPTHLLRLLRFRSIPNFKVLRADCTSNGGLGTAMDAFLGMDGSDLPVEICQTRALPPSLTLLDAASKIKEAVEQLKLNPPRSRSGFLRFQVSVPPSLKALDWLSSQTESSVAFPQFYLSVKHFENQPHELISSYQMVGVSGIGSAVHFTGSSSSEAHNSLKRYLSVDAPHVNAFGFVGFNYDWNSCSMKHESGSFYFFIPQIELDEFETTSLLVANLVWDESLSHTFEKAVRCLELTLRQSIFNVCPIQESRHDKWIRFNQGNLTMKEDQNIRMVCLNANSLLDSGTIANKFQLEDAPTSDRFYFKLSMTLAFSSKMVDGPSALHCSLQECANINFVWASLVIEECTRLGLTYFCIAPGSRSSPLAIAASSHSRTTCISCIDERSLAFHAVGY…
	405	UN001157	4971	ATGGCTACTGCAAACGCACCGATCACGATGAAAGAAGCCGTTACGCTCCCGAGCTTGGGGATCAACCCACAATTCATTACCTTCACAAATGTGACAATGGAATCTGACAAGTATATATGCGTGCGGGAAACTTCTCCTCAGAACAGTATTGTTATTGTGGATATGAATATGCCCATGCAGCCATTGAGGAGGCCCATTACTGCAGATTCTGCTTTAATGAATCCTAACAGCAAAATACTAGCATTGAAAGCTCAACTTCTGGGAACTACTCAAGATCATCTCCAAATATTCAATATTGAGATGAAAGCTAAAGTAAAATCTCATCAGATGCCTGAGCAGGTTGTGTTTTGGAAATGGATCACTCTGAAGTTATTGGGATTGGTCACACAAACTTCTGTT…	1657	MATANAPITMKEAVTLPSLGINPQFITFTNVTMESDKYICVRETSPQNSIVIVDMNMPMQPLRRPITADSALMNPNSKILALKAQLLGTTQDHLQIFNIEMKAKVKSHQMPEQVVFWKWITLKLLGLVTQTSVYHWSIEGDSEPIKIFERTTNLSNNQIINYRCDPSEKWLVLIGIAPGPPERPQLVKGNMQLFSVDQQRSQALESHAAAFTSLKVAGNENPSTLICFASKTENAGQIVSKLHVIELGAQPGKTSFTKKQADLFFPPDFIDDFPVSMQISHKYSLIYVITKLGLLFVYDLETATALYRNRISPDPIFLTVEASSVGGFYAVNRRGQVLLATVNEATIVPFVSDQLNNLELAVNLAKRGNLPGAENLVVQRFQELFSQAKYKEAAELAAE…
	406	UN001158	2808	TCAAGGCGATGGGAGGGAAATTTCCTGCTAGTAGATTAACGCCAAGGGAAGTGAGGCAATACAGACAACAAGAAAGGGAAAAGATGCAACAAACACTTGATGAATATGTGCTTATTTGTGCAGGAGAAAGGGTGCAAGCCGAGAAACTTGTCATTGAAAGGGATGATATAGAGAAAGGAATTGTAGAACTCGTGATCCAGCATGGGATTACCAATTTGGTCATGGGAGCAGCTGCAGATAAGCATTACTCAAAGAGAATGAGAGAGCCCAAGTCCAAGAAAGCCATTTATGTTGCCCGTGAAGCCCAACTGTCATGTTGTATATCATTTGTATGCAAGGGAATCCTTATTTGCACCAGTGGAGCTAGTTTAGAGGGAACNNTCAAGGCGATGGGAGGGA…	936	SRRWEGNFLLVD*RQGK*GNTDNKKGKRCNKHLMNMCLFVQEKGCKPRNLSLKGMI*RKEL*NS*SSMGLPIWSWEQLQISITQRE*ESPSPRKPFMLPVKPNCHVVYHLYARESLFAPVELV*REXSRRWEGNFLLVD*RQGK*GNTDNKKGKRCNKHLMNMCLFVQEKGCKPRNLSLKGMI*RKEL*NS*SSMGLPIWSWEQLQISITQRE*ESPSPRKPFMLPVKPNCHVVYHLYARESLFAPVELV*REXRVWMTPPSPISSPSTSSGSSIRLNTRSASLGXSWYAEPS*NSVLDFLIRSKSEGVATGMGVDTISNLSLEEARVLAMPVEGSGDRCGGMSKSNSQGSMSSTWSTIEGGVGSSPSISMERDIDCEDGSLLPLVSELENGGYFTSPS…
	407	UN001159	990	CTTTTTGTCCAAGAGCTCTACCATGGGCCTAGTTTGGCGTTTAAAGACATGGCATTACAGCCTTTAGCGAGCTTGTTTTCTAACCTAGCGGTAGGGAAAAATGAAAAGTATTTAATGCTCGTTTCCACAAGTGGGGATACCGGCCCTGCGACTTTAGAAAGTTTGGCGGGCATGCCTAATGTTTTTGTGGTGTGTTTATACCCCAAAGACGGCACGAGTTTAGTCCAAAAACTCCAAATGGTTACCCAAAGCGCTAGCAATTTAAAGGTCTTTGGGGTGAGTGGGGATTTTGATGATGCACAAAACGCGCTCAAAAACCTTTTAAAAGACGATGATTTTAACGAGGCTTTAAAGATGCGCCAATTGAAATTAAGCGTGGCTAATTCTGTGAATTTTGGG…	330	LFVQELYHGPSLAFKDMALQPLASLFSNLAVGKNEKYLMLVSTSGDTGPATLESLAGMPNVFVVCLYPKDGTSLVQKLQMVTQSASNLKVFGVSGDFDDAQNALKNLLKDDDFNEALKMRQLKLSVANSVNFGRIAFQIVYHIWGLLELYKKGAINSKEKITLAIPSGNFGNALGAFYAKKMGLNIAKIKVVTNSNDVLREFIETGRYDLTHRSLKQTFSPAMDILKSSNVERALFSLFGFERTLELMQALEEEKFYALKPKELALLQEHFSCTSCSDEACLKTIQEVYAEHQYLIDPHTATALNASLKTNEKTLVSATASYEKFPRTTL
	408	UN001161	3351	GCCAGACCAACCACCCCTTCATCTTCCCGCCATCTCAATCCTTCTTCAAATGCATCCAGTCCGTCCACGCCCACCGCATCNCGACCGCCCTGATTTCTCCAGGTCCAAGGAGAACGTCACCGTCACCGTCAGATTTCGCCCTCTTAGTGCTCGGGAGGTTAATAAGGGAGATGAGATTGCGTGGTATGCGGATGGTGATTACACGGTTAGGAATGAGTACAATGCCTCCATCGCCTATGGTTTTGACAGAGTGTTTGGGCCAGCAACGACCACACGCCATGTTTATGATGTTGCTGCTCAGCATGTTGTACGCGGTGCCATGGGAGGAATCAATGGCACAGTATTTGCCTATGGTGTTACTAGTAGTGGAAAGACTCATACAATGCATGGTGAGCAAAA…	1117	ARPTTPSSSRHLNPSSNASSPSTPTASRPP*FLQVQGERHRHRQISPS*CSGG**GR*DCVVCGW*LHG*E*VQCLHRLWF*QSVWASNDHTPCL*CCCSACCTRCHGRNQWHSICLWCY**WKDSYNAW*AKITWNYSIGSERCIWHHTRDTWQRVSSSCFLPGNI**GY**FA*SSRAESANKGRSPGNLCGGNQRRGCFIPCSCPFFDRIWRRAQARGF**F*FT**SEPHYFHLDY*KQPMW*K*RGGRCDIVPVELN*SCRI*KFEN*DNWIAEKRRFIHK*KLTHSWDCDCQTNRWQGYTCSLQRFKTYSLAAVLS*WSWTGFSHLHCYTRL*Q**RDPQYIEVCTP*QARGD*SFSK*DYG*KVSH*KISEGNIQLKTGASSSKAWHNGETI…
	409	UN001165	885	GATGTAGCGGGAGGGAAGCCGATTTACATGGTGTCGGACGGAACGGGATGGACGGCAGAGCATTCCGTTAACGCGGCGTTAGGGCAGTTCGAGCACTGCTTGGTGGATAGGGGCTGCCCTGTTAATACCCACCTCTTCTCCGGGGTTGATGAGGAAGAACGTTTGATGGAAATTATAAAGCAAGCAGCCAAAGAGGGAGCATTGCTCCTCTACACCCTAGCAGATCCTTCCATGGCTGAGTCTGCAAAGCAAGCCTGCCAGCTTTGGGGAGTGCCATTCACTGATATCTTGGGCCCCACCACAGAGGCCATTGCAACCCATATTGGTGTCTCCCCATCCGGCATTCCTCGTGGTGCCCCTGGACGAAGTCTCCCCCTCACCAAAGAATATTTTAAACGG…	295	DVAGGKPIYMVSDGTGWTAEHSVNAALGQFEHCLVDRGCPVNTHLFSGVDEEERLMEIIKQAAKEGALLLYTLADPSMAESAKQACQLWGVPFTDILGPTTEAIATHIGVSPSGIPRGAPGRSLPLTKEYFKRVEAVEFTIKQDDGAQPKNLKMADIVLVGVSRTGKTPLSIYLAQKGYKVANVPIVMGVALPQSLFEIDQDKIFALTINPVILQTIRRARAKSLGFDGKTRSNYSEMDHVREELEFASQIFAQNPVWPVIEVTGKAIEETAAVVVRIYHDHKQKCSMPRISKRY
	410	UN001166	3783	TCTGTTAATCAGAATACTACAGAAGATTCTGTTTCCACAGTGACTACAAGAGGTTACCAATCAGCTGAGTCCCAGTTCTATCAACGGTCTCCACTGGAATGCCCCCCACAAGAAGGGAGACAACACTTATCCTGGGGTGCTATGGAGCTGCAGCAAAATCCAGCAACGCTTGAAATCTCTGGGACTCCTTTGGGGCAGGAAAAGTTAAACAAATCTCAGCGGGTCCGCTACAAGAGCGTTCAGTTTGAAGATGTTTTTTCTTCCGAAGAGAATCCAAGGTTAATTTATATTAATGACCCAAGGAGGACAAATGATAAGTATGAGTTCACAGGGAATGAGATCCGAACCAGCAAGTACACTGTAATCACGTTTCTGCCAAAAAATCTGTTTATCCAATTC…	1261	SVNQNTTEDSVSTVTTRGYQSAESQFYQRSPLECPPQEGRQHLSWGAMELQQNPATLEISGTPLGQEKLNKSQRVRYKSVQFEDVFSSEENPRLIYINDPRRTNDKYEFTGNEIRTSKYTVITFLPKNLFIQFHRVAYLYFLAIAALNQLPPLAVFGRTVSLFPLLFVLVVTAIKDGYEDWRRHRSDQKENNREARVLQSGQFIMKKWKKICAGEVVRICADETIPCDMVLLGTSDPSGIAYVQTMNLDGESNLKTRYARQETQETVSATVEGGALSGLIRCEQPNRNIYEFTANMEFNGYRVPLSQSNIVLRGCQLKNTDWVVGVVVYAGQETKAMLNSAVSPSKRSRLETYMNRETLWLSVFLFVMCSIVAVGMGLWLKRHGHQLDTLPYYRKIYFT…
	411	UN001167	1329	ATGGCTTCAGTTAGAAGAACTATCTTAATGGCTCAGCGTGATGGAGGTGCACAAAATGACGAGGCATTTCCAGTCTCTTCATCCCCTCCCAAGTTGTTGTATACTCAGAATTATTTGCCACCAGTAGGCTCATTAGCTGCATTATTTTGCTCCTTGGATTTATTTTCGGCGTTGCATAGGATTCGAATGTTTGTTCTTGGAGCTTTCTCAAAGAGATCTTCTCGGTCTATGGAGAGGACAGCAAAATCAAAAGGACATAGATGGATGAGGGCTTTCTTCCATTTCTTTGTCTGTTTTATGCTTGGGGTTTTCATTGGTTTAGCCCCATTGATCTCTGTGGATTTCTCTACGAATTTTGTGCTGAAACATCAACGATTTTCCTTCGAAATTAAGCCAACA…	443	MASVRRTILMAQRDGGAQNDEAFPVSSSPPKLLYTQNYLPPVGSLAALFCSLDLFSALHRIRMFVLGAFSKRSSRSMERTAKSKGHRWMRAFFHFFVCFMLGVFIGLAPLISVDFSTNFVLKHQRFSFEIKPTKGTEREFFDVSRYRASLIENEDLKHNASLEMKRELRDETMDPFSLSSPTNDSDFSNQKLLIIVTPAHTRPFQAYYLNRFAHTLKHVPPPLLWIVVEMSFQSPETAEILRKTGVMYRHLVSQANLTSIKDRAVHQRNVALSHIEKHRLDGIVYFADDYNMYTVDLFEQIREVRRFGTWPVAMLRERNNKVIVEGPVCNGSQVIGWHTNERSKRTRRFHVDMSGFAFNSSVLWDPKSYHRPTPELIRQLDTAKEGFQESTFIEQLVED…
	412	UN001168	4719	TGTCGTAGGGCGCATAGTTGAGAAGGGTTTCTCTACCAAACTCCACCAGCAGAAGAAAGCAGTGGATGGTCCTCCTCCTAATACCTTTATGCCTAAACCCACCGTCCTTCCTTTCCCCGTCGCTCGACACCGCTCCCATGGACCTCACTGGGCTCCATTAGGGAGTCAAATGGATGAAGACCAAGACGAAGACGGAATTGAAGATAGAGATGATACTGATTTTGTCCCTGTTGCAGCCTTTGCAAATCCAATCAACAGGAAACATAAAAAAGGATTGGACTTTCGCAAGTGGAGAGAGTTGGTTCCTGAGGATTATCGCCCAGTAAACCAAAAACAGAAAATGGAAAATACGGTGCTGCTGCTGGCCGAGTCTGAAGAAGGAATGGGAGTAGGAGAAGC…	1573	CRRAHS*EGFLYQTPPAEESSGWSSS*YLYA*THRPSFPRRSTPLPWTSLGSIRESNG*RPRRRRN*R*R*Y*FCPCCSLCKSNQQET*KRIGLSQVERVGS*GLSPSKPKTENGKYGAAAGRV*RRNGSRRSN*RCARRQKYEPTRFT*YHSL*P*KSE*GAAFQL*CGYG*KSRGHGY*FRSX*IQSLSLIWIITTWVPYLFKRSPTMMDL*LRMSCLTNFYTANKDLCLLWMTSMLKIVPAYKICHQKRLHKHRQR*WGKCHQK**RC*RGGGTRNRSRKVTNQTLTLDTSTLLYVIKLNCLKTLELLVHLKVLLLTIQVWPKHHLLEIHLMGQIMVIGHHLVHLIAALGIFGLRELRQ*GR*GFHWMVLLWIVIQSKCL**ANAAHTMLIM*LNV…
	413	UN001174	660	GTTTCTTTCTTTATTGGCGGGTGCTACCATGATAATGTGTAGTGCGATGTTGTTTTCATGGACCTTTGCCACGTATTATTAGATAGACCCTGGCAAGATGGTTGTAGAACAGTTCATGATGGTTACAAAAATACCTTCACCTTCCACAAAGATAATGTGAAGGTTGTTTTCGATCCTACCTGTGAGAATCTACTTACTAAACCCAACCATAAGGGGTATGTGAGTTGCCTCTTTCTTGCACAATTTATGGAAGACGCCATTGAAACAGTAAAAGTATATGTTGTGGTGGGGAAAGAAGTATCTAAAGGAGGAAATTTACTGTAAGAGATAATTCCCTTGATGAATGAATTATCTAAGAGATAATTCCCTTGATGAATGAATTTGGGGATATCTTCCCCA…	220	VSFFIGGCYHDNV*CDVVFMDLCHVLLDRPWQDGCRTVHDGYKNTFTFHKDNVKVVFDPTCENLLTKPNHKGYVSCLFLAQFMEDAIETVKVYVVVGKEVSKGGNLL*EIIPLMNELSKR*FP**MNLGISSPMICPWVFHL*EIYNTTDLVVGAGLSN*SAHGMTPNEHKEINKCLNCWNVDT*EKALAVVLFQHF*YQENGSWRMCIDRRAVNKITIK
	414	UN001177	5055	GATCATGATATGTGTTTCGAGTGCTTGCAGAAAAGCATCCAAACCGATTTCTCCGAAAAACTCATCTTCCGTCACGGTATTTCCGATTCCGTTCTTCCCTTCTCCTCCAGGGCTGCCGTCCAGATTGACTTGAATAATAAAGCAGACAAAACAGCCAGCGAAGAACTTTCGCCTCAATTCATATTGCTGCGTGTGACAAACCATGACAACAAGTGCTTATCAAAGTTTATTGTTGGGCAGGCTACAGAAAATGATACGGAGGATCATGTACATGGAAATGGAAACTCAGGTTTAGCAGGAATATGTCAGCTCCATGCTGAATCCAATGCTGAAGTATCCAAAAACGACGATGAATCATTATCTTCCTCCGAGGAAAATCCTCAGTGTTCTGTGAAGTTT…	1685	DHDMCFECLQKSIQTDFSEKLIFRHGISDSVLPFSSRAAVQIDLNNKADKTASEELSPQFILLRVTNHDNKCLSKFIVGQATENDTEDHVHGNGNSGLAGICQLHAESNAEVSKNDDESLSSSEENPQCSVKFGSKTSTVELSKSSTEFSSELFSSRMVSAFSPIAYVGTGSYSVIENIICKYLSGSVEDHVMASLRFLLEGEPTDQYGADFLNLVGIPTFAENGICKCARHPNIAPVLGMLNMPGSVNLLYPKTPYSLENILHYSPKALKTDWHIRFLIYQILSALAYIHDLGVAHGNICPSNVMLTDSCWVWLNVCDEHRVKTLSLRKQEVPVLLPSETRCCMRSCPCQALYADLKLSPSIDWRSDFKQWWRGELSNFDYLLLLNKLAGRRWGDHTF…
	415	UN001178	2229	TGGGTATTCCACAAAACACTTGGAGAATGGAGAGTTGGTTGTATGTCATTGGATCCAATCGCCTCGGATTGCAATACACGCGCAAGCGGTATTTCGTTTTCGAAGACGACTTTCTCAATTGCTTTAAATCCATGCCTGCATCAAAGGAAGAGGGTCCAATTAGAAGTGCTCCAATTGATTCCTGCATATGTGTTACTGATTATGGTATAGAAAGCATCAAAGGAAAGGAGTTCTTCATTTTTTTGCTGTATAATGTTTCTAATCATGATGATCGACTAAAGCTAGGGGCTAGGAGTTCAGAAGAAGCAGCAAAATGGGTTATTGGCTTTAAGGAAGCTGCATTGAAGGGCTGTTCAAATCCTGAAAGGCATTCAGTTAGGTTGAAAGGGGACAAGAGAA…	743	WVFHKTLGEWRVGCMSLDPIASDCNTRASGISFSKTTFSIALNPCLHQRKRVQLEVLQLIPAYVLLIMV*KASKERSSSFFCCIMFLIMMID*S*GLGVQKKQQNGLLALRKLH*RAVQILKGIQLG*KGTRE*VIRAP*V*PTGQLTHLHGLIK*WLMLLPLVLGQFLTVKMVIFHSFLALIVQASIHDLDNLI*AYGYSKKQKMGISMRSRGIITQQQWQ*AW*MHLQSLYFR*LCLLVHHDLNGTSVFIRAGWLSKLMVIRILFICS*TAIGYLGE*SEEIYF*DVIGEKKMMEHM*SYTSLCSTENVYLRMAMSGPSLKLEDM*YRLCTKGNNQLLNTCFQLIGSVGILVLCLHLQDP*PSKGFAYLRL*ENC*RPN*ETAHISHPVNWQKRLIY…
	416	UN001184	3114	GTGGATGAGATTGTTCGAAGATTGGGAAGTCTAAATATCAATAGTAGCAGCAAGATCACTACAGCCCAACCAGAAAGTGCACTAGTTGCTTATGATGGAGATAAAAAGATGATTCCATATGAAGGCCCATTCGATCCAACAAAGAAACGTCATCCTCGGCCAAAAGTTGATCTCGATCCGGAGACAGACAGAGTATGGAAGCTTCTAATGTGGAAGGAAGACAATGATGGTAAAGAAGGAATAGATGCAGATAAAGAAAAATGGTGGGAGGAAGAAAGGCGAGTTTTTCGCGGACGGGCGGATTCATTCATAGCCCGTATGCATCTTGTGCAAGGGGACAGACGTTTCACACCATGGAAAGGGTCAGTTGTGGACTCGGTGGTTGGTGTTTTTCTTACG…	1038	VDEIVRRLGSLNINSSSKITTAQPESALVAYDGDKKMIPYEGPFDPTKKRHPRPKVDLDPETDRVWKLLMWKEDNDGKEGIDADKEKWWEEERRVFRGRADSFIARMHLVQGDRRFTPWKGSVVDSVVGVFLTQNVSDQLSSSAFMALAARFPLQRRSTTHNKEGKSTSAEEQDVSILGSDDFTKQQSNISSQKVYDRGSIRIQEVEPLEEKEMASSNESFSSNMGACTTDCTKSEHIAAFQIGSEICQESSENRADVTFTMTGNACLMGVEDGKGMESVVSSQVSVISSQNSTESTVAADTIGSSSESNSEAENLINRFEGNGNDFYGSTSFLDLLQMERIDMLREFYVNGNESIPSNENFDGAPNQLKDTEYVKSCKGVECLNGVSPSNSTNSTRHP…
	417	UN001187	750	CTGAAGCCGGGAGATTACTCCGCTCCGAACACGGTGCCGGCGTATCCGGTCCAGACGGAGGCGCAGAGCTGCCGGCTAGACCTCTCGGCGGAGCTGTTCGGGGGCGTCGGCGAGGCATGCGGCCGGAATCTCGACCGTAACCGGTGCTGTCCGGTCCTCGCGGCGTGGCTCTTCGCGGCGCACGCTCGGTCGGCGCTGGAGATCCGAGCTCCGGCGCCGGAGTCGTCGGATCTGCCGATGATGCCGGATGACTCGCAGAAGTGTGTCAACTCGCTGCAGAACTCGCTAGTGAGTCGCGATATCCATATCCCGCAGCCGAACTCGAGCTGCGATGCGATCCTCTGCTTCTGCGGGATTCGGCTCCATCAGATCAGCTCGCTCAGCTGCCCGGCGGCTTTT…	250	LKPGDYSAPNTVPAYPVQTEAQSCRLDLSAELFGGVGEACGRNLDRNRCCPVLAAWLFAAHARSALEIRAPAPESSDLPMMPDDSQKCVNSLQNSLVSRDIHIPQPNSSCDAILCFCGIRLHQISSLSCPAAFNVSEHRNATPTAAVRDLERNCKNSSYAGCTRCLESLQKINGVNGSKEGDDRASKMFNRDCQLMGLTWLLAKNKTAYIPTVSAVLRAIMYSAHPPLESKCSPDQENMPLAVDSLQFQK
	418	UN001189	3375	GATCTTCGACAATTAGATGGAGATGGCTCCACAAAACCCTAATCTTCTCTCTTGTTCTCGACATCTCCTTCCGATTCCTCATCTTCTTTGCCGCTGCTGATGATGTCGCCGCCTTTGAAAGATCACTTCTTCTCCAGTTCAAGCAGTCCGTCTCCGATCCCGGTGGCTTGCTCTCCGGCTGGACTGCGACCGATTCTGGCCACTGCTCCTGGTTCGGCGTCTCCTGCAACTCGGGTTTTAGAGTGTCGTCTCTCAACATCACAGGTAATTCGGATGCCTCTTCTTGCTATGGGTTTTCGCAAGTTCCGTTTCCAGGGTATGGATTTCGAAGTGGTTGCTCAGTTGGATCTAAAAGATTGGTCGGGATCCTGTCGCCTGCTGTCGGGAAGCTATCAGAAA…	1125	DLRQLDGDGSTKP*SSLLFSTSPSDSSSSLPLLMMSPPLKDHFFSSSSSPSPIPVACSPAGLRPILATAPGSASPATRVLECRLSTSQVIRMPLLAMGFRKFRFQGMDFEVVAQLDLKDWSGSCRLLSGSYQKLGFWLCR*MGSMVRSLLRSLV*KSWKFWILRAIPCLGIYLLNWGV*RICASLILLLIRFQGKFHLPFRLALNWKS*TWVGIMRSMEQSLGL*ATSLNLESFIWAGIS*AGLFQLRLEMGV*I*NILICLVICCVVTFPVIWAIAVGCRLYCCFQIFLTISFHRTLVVSRSCKFWMYQGTVLVARYLPRSETAWN*MFLFFQICTTHFPLVII*MRLLMSRIISKGEFLPALPYCRNLRSCGLLGRLWKEHFRVNGVPVATWKWLIW…
	419	UN001190	966	AGGATAAGGCGACCTACCCATATGCTGAGGAATCTGCTATGGGCAACTTCCAAGCATGATGTCTACTTGATGCAGAACTACTCTGTCATGCATTGGTCTTCCCTGCTCCGAAGAGGCAGGGAGGTAATCAATGTAGCTGGGCCAATCACACCCAACCTGAGACACTGTGGATCCATAGCCCAATCCCTCTCGAGGGTACAAATTAGCACCATGGCTGTGAAAGACAATTTGATGGTTGCTGGTGGTTTCCAAGGGGAGATCATTTGTAAGTATCTGAATCACCCTGGCGTGGCATTTTGCACGAAAATAACCAATGGCGAGAATGCCATCACCAATGCAGTAGACATATATCGGAGTTCCAATGGGTCAACCCAACTGATGACTGCCAACAACGATTCT…	322	RIRRPTHMLRNLLWATSKHDVYLMQNYSVMHWSSLLRRGREVINVAGPITPNLRHCGSIAQSLSRVQISTMAVKDNLMVAGGFQGEIICKYLNHPGVAFCTKITNGENAITNAVDIYRSSNGSTQLMTANNDSHVRIFDTEKFALLRCFSFPWSVNNTSVSPDGKLLGILGDNTDCLIADAISGKGVETLKGHLDYSFASAWHPDGRILATGNQDTTCRLWDVRNLSKSLAVLKGRMGAIRSIKFTSDGRFIAMAEPADFVHIYDTQSDYRKAQEIDLFGEIAGISFSPDTEALFVGVADRTYGSLIEFNRRHCNQYLDSLM
	420	UN001191	1878	TGCTTCAGCAGTCTTCTATGGTTTTGGTGCATTTCTTGTGATGAACTTCCACAAGGGCCAAGTGCAGGAAAATGGACATGTGTATGTGCTTCTAGTGATTTTGGAACAGATAGTCATGCCTTTGTCACCAATTGCTCCACAGCATGTGACTGTAGACCAGATGATATAGGAGGACCAAATGGAACAAAATGGACATGCTTTTGTAGCAGTGAGGAAGCACCTGCAACATTGGGTGACATCCACAGCGCCAGTTGTTTTACAGCCTGCAACTGCACATCGGGTTCTCAAGATACTTCAAGTGCTCCTAGGAAGCGAATTTCTAGTAAAGCAGTCATGTACATTCTCTTACTTTGCGTGGCGTTCGCAACTGTTACTTTTCTTGCTTCAGTTGCATGCTGT…	626	CFSSLLWFWCISCDELPQGPSAGKWTCVCASSDFGTDSHAFVTNCSTACDCRPDDIGGPNGTKWTCFCSSEEAPATLGDIHSASCFTACNCTSGSQDTSSAPRKRISSKAVMYILLLCVAFATVTFLASVACCIYRKDKCPVQPPIFSTDKDTSWNSAANLISHKSVSMPEFQVKMKSHFNPITGCIHKASFMLRSKRGMIPGAIIQFSYYELEQATNKFSNSRLVGLGGSSNVYCGELRDGRVVAVKRLKLQGGPNADFDFLTEIELISRLNHCHVVPLLGYCSESQGRHVERLLVFEYMSNGNLRDCLDVTQGKEPIDWGTRVGIALGAARGLEYLHEAAAPRILHRDVKSTNILLDEKWRAKITDLGLAKRLMADDLPSCSNSPARMLGTFGYFAP…
	421	UN001192	1500	ATGCTTACCAGAATCATCAAACGCGGCGGTCGCAAGATTCCCAAATCTGATGCGAACGAGCTCTATCCTCACGGCTCCGGATACCGGAATTCCGGATCTGGCTCGAGCTCGAAGGTCACCGTAAACCATGCGTCTCGAACCACCATCCCTTCCACCACCAACACCACCGTTCAGCAATCGAATTCGCACGCCCTGCCACCCGCATTATCCGTTTCCGACCCCATCGTCGAATGCCTCCCCCACTTCCGCGACGTCGCCGCCCCCGACCGCCAGGCGCTCTTCGTCCGCAAGCTGAACCTCTGCTGCATCATGTTCGATTTCTCCGATACCCTAAAAAACGCTCGCGAGAAGGAGACCAAGCGCCAGACCCTCCTCGAGCTCATCGATTTCGTGCATTCC…	500	MLTRIIKRGGRKIPKSDANELYPHGSGYRNSGSGSSSKVTVNHASRTTIPSTTNTTVQQSNSHALPPALSVSDPIVECLPHFRDVAAPDRQALFVRKLNLCCIMFDFSDTLKNAREKETKRQTLLELIDFVHSGSSKVAEPVQEELIRTISVNVFRPLPPASHENTGSENVDPEEDDPYLDPAWPHLQLVYELLLRYIVSSETDTKIAKRYIDHSFVLKLIDLFDSEDPREREYLKTVLHRIYGKFMVHRPFIRKAINNIFYRFIFETERHGGIGELLEILGSIINGFALPMKEEHKLFLVRALIPLHKPKSIGIYHQQLSYCITQFVEKDYKLADIVIRGLLKYWPVTNCQKEVLFIGELEEVLDGTQSAEFQRCIVPLFRQIARCLNSPHFQVAERA…
	422	UN001193	1035	CTCTGGGTGGATAAACATCGACCTCGTGAGCTGTCAAAATTGGATTACCACAAAGAGCAAGCTGAAAATTTGCGAAATCTTTGTCAGCAAGGTGATTTCCCACATTTAATGTTCTACGGCCCTTCTGGTGCTGGTAAAAAGACCCGCATCATGTGTTTATTGCGCGAATTGTATGGCGCCGGTGTGGAGAGACTGCGAAACGAAACGATGACTTTTACCACACCATCGAATCGCAAAGTGGAAGTGATGACCGTCGGCAGCAATTACCATTTGGAAGTGAATCCGTCCGATGCCGGTATTTATGATCGAGTTGTAGTAATCGATCTTATAAAGCAAGTGGCTCAAACACATCAAATCGATGCATCGGGGCAACGTGAATTTAAAGTAATTGTTCTCTCC…	345	LWVDKHRPRELSKLDYHKEQAENLRNLCQQGDFPHLMFYGPSGAGKKTRIMCLLRELYGAGVERLRNETMTFTTPSNRKVEVMTVGSNYHLEVNPSDAGIYDRVVVIDLIKQVAQTHQIDASGQREFKVIVLSEVDELTKDAQHALRRTMEKYVATCRIILSVNSTSRVIPAIRSRCLGIRVAAPNEEEITTVLQQTCKREGLTLPAELAARIVDKSERNLRRALLMLETCKVQQYPFTGQQDIVELDWQVFLRETANQIVTEQTPAKLEKIRDRLYELLAQGVPPDMIFRGLVEQLVRNCDMSLKAKTLEYAALYEHRMQNGAKHIFHLEAFVAQFMNIYKKFI
	423	UN001195	3537	TTGAGCTGTGATTCTGAGGAATCTGACAGGCCTCTCATGGAAGGTTCAAGCCAAGCCAAAGTTTCTTCGGCGGTTGCAGGTGGCAAGAATGAGGATATTCCTAGGGTATTTATTAAAAATGGTAGCCCATTCAGACTCATACAAGATTATGCATCTGATGACAGTGCAGAAGATGATACTAGTGCAAGTGTTGAAGATGTCAGCCCTGAAAGGGTTTCTCCGTCCGCTCCAGTGTGTAGTTCGGCTTTGCATGAAGATGAAGGGATGGATGTTTGTGCGAATGTAGTCTCCAAGACGGTTTCTGAGATTGAAAAAATATCCAACATGGCATCTTTTATGACAGAAGCTGTTCAACGTTCAGATGGTTCTATCATATCTTATGAAATGGCATTGAAAACT…	1179	LSCDSEESDRPLMEGSSQAKVSSAVAGGKNEDIPRVFIKNGSPFRLIQDYASDDSAEDDTSASVEDVSPERVSPSAPVCSSALHEDEGMDVCANVVSKTVSEIEKISNMASFMTEAVQRSDGSIISYEMALKTVTSPDESTAVAKTDEPNACKDENVALSDRTRSVKTLETVVLQGDSVDTDRTSGKVHKDEDATQASTTLKVDEFGRLVREGMSDSDSDGMDYSWRSGKRGRSPSPQESRWKRRSRSPRRRRDRRSRSRSWSPKKQRSRSKSPPAFRRVGDFGGEKTRRDFKGPPPECFDFLRGKCYRGASCKYLHHDSTPSNPPKWNRNKREHYREVPPDLRNSVVHGDPHYAAEADDADNIVAELGSDGHDTLQEKGKRQDTQIRQDLSVASTKAE…
	424	UN001196	2373	TCTAGAGCTCCTTCAAAGAAGAAGGAAGAAGAGGATGTGTGTTTCATATGTTTTGATGGTGGGAATCTTGTCCTCTGCGATCGCAGGGGTTGCCCCAAGGCATATCATCCTTCATGTGTTAATCGCGATGAGGCATTCTTCAAAGCAAGGGGTCGATGGAATTGTGGTTGGCATATATGCAGTCAATGTCAAAAGAGTGCCCATTATATGTGCTATACTTGTACATATTCACTATGCAAGGGTTGTATAAAAGAATCTGGGTTTGTATGTGTTAGAGGAAACAAGGGATTTTGTGTGACTTGCATGAGAACTGTGATGCTGATAGAACAAAGTTTTCCTGCAAACAAGGAAGTGGCTGTAATAGATTTTGATGACAAAAGTAACTGGGAGTATTTATTC…	791	SRAPSKKKEEEDVCFICFDGGNLVLCDRRGCPKAYHPSCVNRDEAFFKARGRWNCGWHICSQCQKSAHYMCYTCTYSLCKGCIKESGFVCVRGNKGFCVTCMRTVMLIEQSFPANKEVAVIDFDDKSNWEYLFKDYWLDLKGKLSITTEELTSAKNPSKGSGVSVLNEESSGDLYDANDDNGSSSDSSLGHSEGRNSATRKKSKKQSRSLANEVSAPSVKKAVRNEGVSVSGDTEWASNELLDLVAHMKDGDKSVLSQYDVQALLLEYIKQNNLRDPRKKSQIICDSRLQNLFGKARVGHFEMLKLLECHFLIKDVPDDTQGGVSDGEAFYVEAESHSDAISKAGSDKRRRTRKKAEERELQTNLDDYAAIDVHNINLVYLKRNLMEDLIDDIDNFQDR…
	425	UN001200	150	GAATCGGTTTACTGCTATTGCCGGTGTCCCTACGATGAAGTATCAGAAATGATTGCTTGCGATGGCGAGAATTGTCTCATTGAGTGGTTCCACTTTGAGTGTGTGGGTATTATGGTGGCCCCGCAGGGTAAGTGGTTCTGTGCTGAATGT	50	ESVYCYCRCPYDEVSEMIACDGENCLIEWFHFECVGIMVAPQGKWFCAEC
	426	UN001203	591	GCCAATGCTGAAGGAGCATCCGAAGAGAATGTCCTATCGTATGAGGCCGTACAGCGGTTATCCATTAACTATACGCGGCCGGTTATCGTGCTCGGCCCATTGAAAGATCGCATCAATGACGACTTGATATCGGAATATCCAGAGAAATTTGGCTCCTGTGTACCACATACGACTCGACCGAAACGTGATTACGAAGTAGATGGTCGTGATTATCACTTTGTATCGTCACGTGAGCAAATGGAACGCGATATACAAAACCATCTATTCATCGAAGCGGGACAGTACAATGACAACCTTTATGGCACATCGGTGGCGAGTGTGCGTGAAGTAGCGGAGAAGGGTAAACATTGCATTTTGGATGTGTCGGGCAATGCCATTAAGCGGCTACAAGTCGCTCAA…	197	ANAEGASEENVLSYEAVQRLSINYTRPVIVLGPLKDRINDDLISEYPEKFGSCVPHTTRPKRDYEVDGRDYHFVSSREQMERDIQNHLFIEAGQYNDNLYGTSVASVREVAEKGKHCILDVSGNAIKRLQVAQLYPIAIFIKPKSVDSIMEMNRRMTEEQAKKTYERAIKMEQEFGEYFTGVVQGDTIEEIYSKVKA
	427	UN001204	1710	GTCGCCGTTGAAGGAGGTCGTTATGATGTCAATATAAAGGAACGCACTAAAACATCAGTCTACTGGGAGTGTACACCAATTGAGGTGAGGCGGTGTTCATGGTTCTATAAAGGCACCGATTCCAAAATGGTGCCCTATGAGGAGCCAATTGCCGATCTGCTCGAAAACGAGTACAAACAGGCAGTCGAGAGTGGAGAATGGCATAAGAAAATCGTACTCTCTATGAATGAACAAGTGACATTCCATGGACCAACTGTGATTGTACACTTCCAACAACAGCAATCCAGCGATGCCTGGGGAGGCACTTCACAAACGACAACACGGCCCCGCGTGGTTAAACGCGATCTTGAGGAGTTCACTATTGAACAGGGTGAATCGGAACGGGTCGATCACTTATTG…	570	VAVEGGRYDVNIKERTKTSVYWECTPIEVRRCSWFYKGTDSKMVPYEEPIADLLENEYKQAVESGEWHKKIVLSMNEQVTFHGPTVIVHFQQQQSSDAWGGTSQTTTRPRVVKRDLEEFTIEQGESERVDHLLLMVHGIGAACDLKMRSVDEVVDDFRNIAQALVQSHYKNSTDMGLVGRVEVLPISWHSHLHSEEMGIDEKLRSITLESIPKLRNFTNNTLLDVLFYTSPKYCQKIMNTVAASMNEVYNKYRERHPEFSGGVSVAGHSLGSLILFDLLCHQKAPKETEEQNLENPDQHGTSPMETNNDDLSVTTYTMGHAGTGQPFIHYTQLNFQPKKFFALGSPIGMFVTIRGIDKLGLDFRLPTCAGFYNIFHPFDPVAYRIEALVNPDLSGVRPV…
	428	UN001206	3090	ATTATAACGAATTTGCTTTCATCGGACAGCGATGTTATTAAGAAGGCAACGTCTGATTTGCAGGAGGCTTACAAGCATCCCGAGACAATTCCTGCTCTTTGTGAAATTGCTGTATCTGCTCCTGAGCCGCAGGTTCGTCAATATTCTGCGGTATTACTTAAGAAGCATTTGTCAAAGTTACGTCAATGGAACAAAGTGCCGGCCGAGCAACAGCAAATCATTAAGCAAGGTATGCTTAATGCACTCATGCAGGAGCAGCAGAAGTCTGTACGTAAAGCTATCGCTCAATTCGTTGGTGTTTTGGTGCGCCACGAAGCCAAAAAGGCCGATTCATGGATGAATGAGGTGCTTAAGTTCATATACAGCTATTGCTCTTCGGCCGATCCCAAACAAAGTGAA…	1030	IITNLLSSDSDVIKKATSDLQEAYKHPETIPALCEIAVSAPEPQVRQYSAVLLKKHLSKLRQWNKVPAEQQQIIKQGMLNALMQEQQKSVRKAIAQFVGVLVRHEAKKADSWMNEVLKFIYSYCSSADPKQSELGSSTFAILADAAPDQFLQHMESVCEMFTAALVATEATGNMATPVIFNILTGMTYLVPFTLGHNTAEQTLQKSIPLIVKSLQAFAVQPEVDQFVHAFDILESMADLNAKLLNNHIKMLLEFCLEAANNAQLDSAVRIKAVAYVGWLVRLKKKLIIKQKLIEPIIRVVFNLMATEPEDEDDDEEYFLGEDNSNPMTTATQTMDLLALSVPPEKLIPPLLQLLEPALQGPDPLPRRAAYLSMAVIAEGCSEAICNKYLETMLNIVKVG…
	429	UN001211	1827	GCCTATATTATGTCTTACTTCTGGTTTATTATATGGGCACTAATGTTTGCCGCATTGAGTGCTTCATTGGTACGCATGTTTGCTCCCTACGCTTGTGGTTCTGGTATACCTGAGATTAAGACCATTCTTTCGGGCTTTATTATACGCGGTTATTTGGGTAAATGGACTTTGCTAATCAAATCTGTTGGTCTCATGCTTTCGGTATCAGCGGGCTTGACGCTGGGTAAAGAAGGCCCTATGGTACATATTGCCAGCTGCATTGGCAATATATTCTCGCATATGTTTCCAAAATATGGACGAAATGAAGCGAAGAAGCGTGAGATTCTATCCGCAGCTGCAGCTGCTGGCGTTTCGGTGGCTTTTGGTGCACCCATCGGTGGTGTGCTCTTCTCACTCGAG…	609	AYIMSYFWFIIWALMFAALSASLVRMFAPYACGSGIPEIKTILSGFIIRGYLGKWTLLIKSVGLMLSVSAGLTLGKEGPMVHIASCIGNIFSHMFPKYGRNEAKKREILSAAAAAGVSVAFGAPIGGVLFSLEEVSYYFPLKTLWRSFFCALIAAFVLRSLTPFGNEHSVLFFVEYNKPWIFFELIPFVFLGIMGGVIGTIFIKANLWWCRYRKFSKLGQYPVIEVLVVTLVTGILCFPNPFTRMNMNELIYLLFSQCSPGETNNPLCDYKRMNITNGATSSIEVTEPGAGVYHAIILLLLAFVFKLALAVFTFGMKVPAGLFIPSLLLGSIMGRIVGIGVERFAYSYPNIWLFTGECVNGKNLITPGLYAMVGAAATLGGVTRMTVSLVVIMFELTGG…
	430	UN001217	3795	ATGGCCCCTCCCTTCATCTTCCCTTCCAAGCTCCACGACCTCGAATCTGAAGACACCGACGACGACATCCATCTCACTGTCCAATCTCCCACCTCCATCTCCTCCTTCTCCTCCTCAGCCCTCGACGAATTCACCAAAGGCGTCGTCTTCGATCTCTCCGACAAAGAGCTCTTCTGCATCGAGGACCAGGACGTCTTCGACCGCGTCTACTCTCTCATCAGAGACTTCCCTTCCCTCCCCGCTTCCTGCAAGTTCAATCTCGTCGAGAGCCTCCGCTCCAATCTCAGCGTCCTCCTCCCCAACATCGACTCCCTCTCGCGGGGGGCTCCCTCCCCTTGTTCAGATGCGGGCGNNCCTTCANCAGATCGCGTCGCGTCTCATCGCAATGCCTTCAAGATC…	1265	MAPPFIFPSKLHDLESEDTDDDIHLTVQSPTSISSFSSSALDEFTKGVVFDLSDKELFCIEDQDVFDRVYSLIRDFPSLPASCKFNLVESLRSNLSVLLPNIDSLSRGAPSPCSDAGXPSXDRVASHRNAFKIYTFFLVAVFRSEESNHSASNNTKAASQTRKKYAANSWNWESQRSRIVSLIANSLEVNLMLLFGSSDPDENYLSFITKFAFSMFENPVLLKDADAKDALCRIIGTCATKYHYSAQSCASILHLIHKFDYVSVHLADAVVWAEKKYMDSSLAISLIREIGRTNPKDYVRDTVGAENIGRFLVELADRLPKLMSTNIGILVPHFGGESYKIRNALVGVLGKLVAKAFKDVDGDVSAKSIRLRSKQAMLEILLERCRDVSAYTRSRVLQV…
	431	UN001219	198	AACAAAATCCGTCGGCCGATGAACGCTTTTATGATATTCTCGAAAAAGCACCGTAAACTGGTACACAAGAAGCATCCAAACCAAGATAATCGCACTGTTAGCAAAATTCTCGGTGAATGGTGGTACGCATTGAAACCGGAGCAGAAAGCCAAGTACCATGAATTGGCTAGTTCGGTAAAAGACGCCCATTTCAAACTG	66	NKIRRPMNAFMIFSKKHRKLVHKKHPNQDNRTVSKILGEWWYALKPEQKAKYHELASSVKDAHFKL
	432	UN001225	792	GACCCGGCGGAGTTTTGGGAAATGGTGGGTGAGCTGGGCGATGGCGCTTTTGGCAAAGTATATAAAGCGCAACACAAGGAACACAAACGTTTTGCAGCGGCGAAATTATGCACATTGGAAGATGAAGAAAATCTTAGTGATCACATGGTTGAGATCGATATTTTATCAGAGATAAAACATCCAAACATTGTGGAATTGTATGAGGCGTTTTCAATAGAGGACAAATTATGGATGCTAATTGAGTATTGCGATGGTGGTGCTTTAGACAGCATAATGGTGGAATTGGAGAAACCGTTAACGGAACCACAAATCGCCTATGTTTGCCGACATATGACTGAAGGTTTAAGTTTTTTACATAAAAGTAAAGTAATTCATCGTGATTTGAAAGCCGGAAATGTA…	264	DPAEFWEMVGELGDGAFGKVYKAQHKEHKRFAAAKLCTLEDEENLSDHMVEIDILSEIKHPNIVELYEAFSIEDKLWMLIEYCDGGALDSIMVELEKPLTEPQIAYVCRHMTEGLSFLHKSKVIHRDLKAGNVLLTMEGGVKLADFGVSAKNKHTLQKHDTFIGTPYWMAPELVLCETFRDNPYDLKVDIWSLGITLIELAQMEPPNSEMSPMRVLLKIQKSEPPTLDQPSKWSKEFNEFLKRTLVKDPQQRPTTDILLQHRFI
	433	UN001227	303	CTCTATGTCGGCAACTTAACTTGGTGGACAACTGACCAAGATATTGCTAACGTTATGCGTGAAATCGGGGTAAACGACTTCCAAGAGGTGAAGTTTTTTGAAAACAGATCGAATGGTCAATCGAAAGGATTCAGCGTTATATCACTTGGATCCGAAGCAAGCTTACGGCTAGTCTTAGAACGTCTGCCAAAAAAAGAGCTGCATGGTCAAGCTCCGGTAGTAACGTATCCAACAAAGCAGGCGTTGAACCAGTTTGAGAGTTTACAGAAGACACGTCCGGTACCACCGTCGCAACAGAATGGA	101	LYVGNLTWWTTDQDIANVMREIGVNDFQEVKFFENRSNGQSKGFSVISLGSEASLRLVLERLPKKELHGQAPVVTYPTKQALNQFESLQKTRPVPPSQQNG
	434	UN001233	4299	ATGGGCGATCATGAAGGCTGGGCGCAGCCAACTGGCCTTCTGCCCAACGGCCTCTTGCCCCACGAAGCGGCTAGTGTGACCCGAGCTCTCAACATGGAGCGGTGGTTAAAAGCCGAGGAAAGGACTGCAGAGCTGATTGCTTGCATTCAGCCCAACCAACCGTCCGAAGAACGCAGAAATGCGGTTGCAGACTATGTGAAGAGGCTTATAATGAAGTGCTTCTCCTGTCAGGTTTTCACCTTTGGCTCTGTACCTCTCAAGACCTATCTCCCAGACGGGGATATCGATTTGACTGCTTTCAGTAAAAATCCAAACTTGAAGGATACATGGGCACAACAAGTCCGCGATATGCTTGAGAGTGAGGAGAAAAGTGAAAATGCAGAATTTCATGTAAAAGAA…	1433	MGDHEGWAQPTGLLPNGLLPHEAASVTRALNMERWLKAEERTAELIACIQPNQPSEERRNAVADYVKRLIMKCFSCQVFTFGSVPLKTYLPDGDIDLTAFSKNPNLKDTWAQQVRDMLESEEKSENAEFHVKEVQYIQAEVKIIKCLVENIVVDISFNQLGGLCTLCFLGEVDHLINQNHLFKRSIILIKAWCYYESRILGAHHGLISTYALETLVLYIFHLFNNSFAGPLEVLYRFLEFFSNFDWDNFCVSLWGPVPICSLPEMTAEPPRRDSGELLLSKPFLDSCNVNYAVFPSGPENQGQPFISKHFNVIDPLRTNNNLGRSVSKGNFFRIRSAFAFGAKRLARLLECPKENLITEVNQFFMNTWERHGSGHRPDAPSPDLWRTKLSTQFLIRA*E…
	435	UN001234	1161	GGACAGGAGGGCGGACCTCGCATGAACACAATTTCTCTTACAGTACTCATTGATTTTATTATTCAACGGACTTATCATGATCTCACTGTGCTCGCAGAATTGTTACCACGCAAAACTGATATGGAACGCAAAATCGAGATTTACAATTTTTCGGCGCGAACTCGACAGCTATTTATACGACTTATTGCCTTGGTAAAATGGGCCAATTCTGTTTCGAAAGTGGATAAATCAGCTAATATCATGAGCTTCCTGGATAAGCAAAATATGCTGTTTATAGAAACTGCGGATATGTTGGCGCGCATGTCGCGTGAAACGCTAATACGTGCACGTCTGCCAAATTTTCATATCCCTGCCGCTGTGGAGGTGCTCACCACTGGCACATACAATCGTCTTCCCACA…	387	GQEGGPRMNTISLTVLIDFIIQRTYHDLTVLAELLPRKTDMERKIEIYNFSARTRQLFIRLIALVKWANSVSKVDKSANIMSFLDKQNMLFIETADMLARMSRETLIRARLPNFHIPAAVEVLTTGTYNRLPTCIRERIVPPDPITPAEKKQTLLRLNQVIQHRLVTGKLMPQMREFKIKNGRVTFEVKHEFNVSLTVMGDGNNVPWRLLDIDILVEDKETGDGKSLVHQLQVNYIHQLIQARLVENPNALSEVYNCLHYFCQSLQLEVLYTQTLRLSYERLDDNINVEEYVPGVKITVSYWRELTSKDPKSELGYRLTVQSDPNEIGRPLAVVHVPSLGAKESAEVADRAVRSDHLSMERLIVYTVYIRSVSRLNDLKLEYQSFLK
	436	UN001236	780	TTAATCGCTGGGCCATGCGTCATTGAGAGTTTAGAAAATTTAAGAAGTATCGCTACTAAATTGCAACCCCTAGCCAACAACGAGCGATTGGATTTTTATTTTAAAGCGAGTTTTGATAAGGCTAACCGCACGAGTTTAGAGAGTTACAGAGGGCCTGGTTTAGAAAAAGGCTTAGAAATGTTACAAATTATCAAAGAGGAATTTGACTATAAAATTTTAACCGATGTGCATGAGAGCTATCAAGCAAGCGTGGCAGCCAAAGTAGCGGATATTTTACAAATCCCGGCGTTTTTGTGCCGCCAAACGGATCTGATTGTAGCAGTGAGCCAAACTGACGCTATTGTCAATATCAAAAAAGGGCAATTCATGAACCCAAAAGACATGCAATATTCTGTCTTA…	260	LIAGPCVIESLENLRSIATKLQPLANNERLDFYFKASFDKANRTSLESYRGPGLEKGLEMLQIIKEEFDYKILTDVHESYQASVAAKVADILQIPAFLCRQTDLIVAVSQTDAIVNIKKGQFMNPKDMQYSVLKALKIRDKSIQSPTYETALKNGVWLCERGSSFGYGNLVVDMRSLKIMREFAPVIFDATHSVQMPGGANGKSSGDSSFAPILARAAAAVGIDGLFAETHIDPKNALSDGANMLKPDELEYLVTDMLKI
	437	UN001237	381	ATGGATGCAACTCAACCTCAGCAGCCATCTCCACAATCTGTTGGCCGCGAATTTGTGCGCCAATACTATACTCTACTGAATCGTGCACCAAATCATTTACATCGTTTTTATAACAACCATTCATCGTTTATACACGGCGAATCAACTTTGGTGGTGGGCCAGCGTAATATTCACAATCGCATTCAGCAATTAAACTTTCATGATTGCCATGCCAAGATAAGTCAGGTGGATGCTCAGGCAACGTTAGGTAATGGTGTTGTTGTTCAAGTGACAGGCGAATTGTCGAATGATGGCCAACCGATGCGTCGCTTTACGCAGACATTTGTGTTGGCTTCGCAATCGCCGAAGAAGTACTACGTTCACAACGACATCTTCCGTTAT	127	MDATQPQQPSPQSVGREFVRQYYTLLNRAPNHLHRFYNNHSSFIHGESTLVVGQRNIHNRIQQLNFHDCHAKISQVDAQATLGNGVVVQVTGELSNDGQPMRRFTQTFVLASQSPKKYYVHNDIFRY
	438	UN001240	273	AGCGATGGACAAAAACAGCGCTTAAAGATTGATTTAGCTCTTAGCCACCACCCCCAATTAATTATTATGGATGAACCAGAAACTAGTTTAGAACAAAACGCTCTTATAAGACTATCAAATCTCATAAGCTTGCGCAACACCCAACAACTTACAAGTATCATCGCCACTCATGATCCTATTGTCTTAGATAATTGCGAATGGGTATTGCTCCTTAAGAATGGCAACATTGCTCAATACAAACCTTTAAATTCTATATTAAAATCTGTAGCTAAA	91	SDGQKQRLKIDLALSHHPQLIIMDEPETSLEQNALIRLSNLISLRNTQQLTSIIATHDPIVLDNCEWVLLLKNGNIAQYKPLNSILKSVAK
	439	UN001241	1296	GAGGAGTTCGATCAACACCTGATAAAATATTCCGATGTTTGCGAAAATCCCAGTTTGTTCTCATCGCCAAACCTAGTTGTACGCCTGAATGGCAAATACTACACCTGGGCGGCTGCATGTCCAATTGTCATGACCATAATAACATTCCAGAAACCACTGACTAACGACGCTGTTGAGCAGCTGATGGCCAATGCCAAACAAGATGGGGTGGCGCACAAGAATGAGCCAGACGGCGCTACGGCTGGCGTTAGTGCCCAATCGAAACGTTCCTGGTGGAATTGGAGGCGCTCTCAGGTTGGCGCCACTGCTAGTTCTACAAAAATTTCCAAATCGGAGGACAAGATTGACGAGCGAGATTCCGACCAAGCAGCTGTGGCCACACAAACTACACGTCCCAAT…	432	EEFDQHLIKYSDVCENPSLFSSPNLVVRLNGKYYTWAAACPIVMTIITFQKPLTNDAVEQLMANAKQDGVAHKNEPDGATAGVSAQSKRSWWNWRRSQVGATASSTKISKSEDKIDERDSDQAAVATQTTRPNSPDISENTLSKTDSTLNAENTSAQVENLEDLSQASSKGDPSTSNSNKNERYKKSLRLSSEAIKQLNLKDGMNEIEFSVTTAYQGTTRCKCYLFRWNHNDKVVISDIDGTITKSDVLGHILPMVGKDWAQLGVAQLFSKIEQNGYKLLYLSARAIGQSRATREYLRSIRQGDVKLPDGPLLLNPTSLISAFHREVIERKPEQFKIACLSDIRELFPKKDPFYAGYGNRINDVWAYRAVGIPIMRIFTINTKGELKHELTQTFQSSYC…
	440	UN001242	2160	TGGGTATTCCACAAAACACTTGGAGAATGGAGAGTTGGTTGTATGTCATTGGATCCAATCGCCTCGGATTGCAATACACGCGCAAGCGGTATTTCGTTTTCGAAGACGACTTTCTCAATTGCTTTAAATCCATGCCTGCATCAAAGGAAGAGGGTCCAATTAGAAGTGCTCCAATTGATTCCTGCATATGTGTTACTGATTATGGTATAGAAAGCATCAAAGGAAAGGAGTTCTTCATTTTTTTGCTGTATAATGTTTCTAATCATGATGATCGACTAAAGCTAGGGGCTAGGAGTTCAGAAGAAGCAGCAAAATGGGTTATTGGCTTTAAGGAAGCTGCATTGAAGGGCTGTTCAAATCCTGAAAGGCATTCAGTTAGGTTGAAAGGGGACAAGAGAA…	720	WVFHKTLGEWRVGCMSLDPIASDCNTRASGISFSKTTFSIALNPCLHQRKRVQLEVLQLIPAYVLLIMV*KASKERSSSFFCCIMFLIMMID*S*GLGVQKKQQNGLLALRKLH*RAVQILKGIQLG*KGTRE*VIRAP*V*PTGQLTHLHGLIK*WLMLLPLVLGQFLTVKMAYGYSKKQKMGISMRSRGIITQQQWQ*AW*MHLQSLYFR*LCLLVHHDLNGTSVFIRAGWLSKLMVIRILFICS*TAIGYLGE*SEEIYF*DVIGEKKMMEHM*SYTSLCSTENVYLRMAMSGPSLKLEDM*YRLCTKGNNQLLNTCFQLIGSVGILVLCLHLQDP*PSKGFAYLRL*ENC*RPN*ETAHISHPVNWQKRLIYSTLKRSTSRKFTQLQSLGXXEAQ…
	441	UN001243	2163	GGTGTCAGGGACTTCGTGCTCCTAGCCAAATAACAATGGAAATTTATGGTTAACTTGCAAAAAAGATTTCAAGCTGGTTCTATTTATACATATATCGGTGAAGTCTGTGTATCTATTAATCCATACCGCCAGATGAATATTTACGGCCCCGATACGATTAAGATATATAAAGGCCGGGAACTGTTTGAGAATCCGCCACACATTTTCGCTATAGCCGATGCAGCATACAAAATTTTAAAACAAAGACATCAAGACACTTGTATCTTGATATCGGGAGAGTCCGGTGCGGGTAAAACTGAAGCGTCAAAAATTATTATGAAATATATTGCGGCCGTTACAAATATCCATGGTCAGAACGAGATCGAGAGNGGTGAAGAACGTGCTATACAAAGCAATTCA…	721	GVRDFVLLAK*QWKFMVNLQKRFQAGSIYTYIGEVCVSINPYRQMNIYGPDTIKIYKGRELFENPPHIFAIADAAYKILKQRHQDTCILISGESGAGKTEASKIIMKYIAAVTNIHGQNEIEXGEERAIQSNSILETFGNAKTNRNDNSSRFGKYMDIEFDYKGDPVGGIITNYLLEKSRVVQQQAGERNFHSFYQLLRGASDNELRQFDLVKDPTRYHYMNQGSIDELSEKADYKGTNNAFKTLGFSTEEVQTIWRTIAAVLHLGNIEFQSIEDDLVISNKXAFTICS*VIQVTXERVV*FFDNSSYCCWRNRYAKGA**HPS*VWQGCLG*SHL*SSIYLDHRTHKS*ILFRGSKTQRASTQ*LAF*TFMDLKFLTAIALSNFV*IIAMKSYNSCLL…
	442	UN001246	2055	CTTAGAATGTACGGAGAATTTCTATTGGAAACGAATTCGCAAAGTTTCGAATATGTTCTGGAAAAAATGTTCAATAGATCTGTCCTTTATTTGGAAAAGATATTAAAATCTCAAAAGTTTAATACTAATAACGACTTGAGTTTTTTGTATTTGGAAGATCGTAATCCCGAAGATTTTGAAAAGGAAAACAGAAAAGAAGCTTATCAAATAATCGCAAAATACGCAGATCGCGAGTATGTACAATCGAATATGTACATAAACTCGGCAGAATTTAAATTGAAGTGCCAAATTATACAGCAAAATAGACAGGCAGCCGATTCAATCGGTAGACAAAACAAGGACCGTGATATTAACCATGGCATAATTCTAATGAAGAAGTATGCCAGTTTAGACGAAACG…	685	LRMYGEFLLETNSQSFEYVLEKMFNRSVLYLEKILKSQKFNTNNDLSFLYLEDRNPEDFEKENRKEAYQIIAKYADREYVQSNMYINSAEFKLKCQIIQQNRQAADSIGRQNKDRDINHGIILMKKYASLDETEIKFIEEKRTNNLCIAVKHYMKFCHIDAGFSNAAIYRVIALWFANKQDQALHKEIKENVDIIPSYKFICALNQITARLNSKHDDFISIIKEILVKCLQDHPHHTLYQLYPLIFDDTGGKSNKTRSNIAADVITRGRNTLNAQCAKQLTLMFPALIQFASADCEKSSTMALSEKLKKLKNLEAVHCPTIELPVLPHRDYTVTSIVKWDERVSLVGGINAPKKLVCLCSDGKSRPQLLKGRDDLRQDAVMQQYFSLINTLLCCDPQTS…
	443	UN001248	1356	GTGCTGGCCAGGATGTAGGCCGCAGTTGTTTGCTATTATCCATGGGAGGCAAAAACATCATGCTTGATTGTGGCATGCACATGGGCTATAACGATGAACGCCGTTTTCCCGATTTTTCGTACATTGTGCCAGAAGGTGCCATTACCAGCCACATTGATTGTGTCATAATTTCACATTTTCATTTGGATCATTGTGGTGCCTTGCCGTACATGTCTGAGATGATTGGTTATTCGGGCCCTATTTACATGACGCACCCAACTAAAGCCATCGCCCCTATTTTATTGGAGGATATGCGTAAGGTGGCTGTCGAGCGTAAAGGTGAATCAAATTTTTTCACCACGCAAATGATTAAGGATTGCATGAAAAAGGTGACGGCCGTCACTTTGCATCAAAGTGTCA…	452	VLARM*AAVVCYYPWEAKTSCLIVACTWAITMNAVFPIFRTLCQKVPLPATLIVS*FHIFIWIIVVPCRTCLR*LVIRALFT*RTQLKPSPLFYWRICVRWLSSVKVNQIFSPRK*LRIA*KR*RPSLCIKVSW*IMNWRLRPTMQVTC*VLQCFGCAWVHNXVVYTGDYNMTPDRHLGAAWIDKCRPDLLISESTYATTIRDSKRCRERDFLKKVHECVARGGKVLIPVFALGRAQELCILLETYWERMNLKFPIYFAVGLTEKANTYYKMFITWTNQKIRKTFVQRNMFDFKHIKPFDKAYIDNPGAMVVFATPGMLHAGLSLQIFKKWAPNENNMVIMPGYCVQGTVGNKILGGAKKVEFENRQVVEVKMSVEYLSFSAHADAKGIMQLIQNCEPK…
	444	UN001256	5304	ACCTTCTCCCAGTATGGAGCTAGTAAATTGTTTCGAAAAGGTGAATGAAAGGGTTACATCAAAGGAGCCGGAGTCAACTGCAGGCCCTCCTATGGAAGGCGACATGGATATTGATATTGGAGAAGTATACTTTTTGATCATGCATTTTCTATCATCTGGGCCGTGTCGCAGGACTTACGGTCATTTTCTGAATGAGCTTTTAGAGTATCAACTTTTGCCTAGAAGATACCATGCTTGGTATTCAAGGAGTGGGCTACACAGTGGTCATGAGGGTGATAATGGCCTATCATTTCCCTTGAGCTACGATAAATCGGTAGAGAGATACCCGCACATAAAAAAGGATCACCTGATAAAACTCCTGAAGCAATTGCTAGCAAGCAATACCATCCCTTCATTACA…	1768	TFSQYGASKLFRKGE*KGYIKGAGVNCRPSYGRRHGY*YWRSILFDHAFSIIWAVSQDLRSFSE*AFRVSTFA*KIPCLVFKEWATQWS*G**WPIISLELR*IGREIPAHKKGSPDKTPEAIASKQYHPFITWHDWGKHSKCG*CSYAPGIWFLVTFGL*EE*RRQESHPIANILALASLAGRSSTWVKSEGDWRWI*KTSSRAIYSCSMLCHC*TINYGTKYGYN*KIKRAPSCCLLCHI*PVWAVCDYWFR*SSCEDLVHGNCILLVQLSWTRR*HY*LGREFK*CCGGFFFK*LQY*SLAFT*WAANFNLTRTYCSCYCYRI*SKARRCLPSFIII**WNMSNLGC*ELPVRSTSLHSKASRCHSWKE*WPTSKYCSIRASHSVLCLQCKWNSFC…
	445	UN001259	4932	AGAAGTTACCAGATCGAAGTCTATAAAGCTGCATTGACGAGAAACACGATAGCGGTGTTGGAAACGGGGGCTGGAAAGACGATGATCGCGGTAATGCTGATGAAGGAAATCGGGCGATTAATTAAGGAGAATGGGGATAAGGGGTTGATTATCTTCTTGGCTCCTCAAGTCAGCCTTGTGAATCAGCAATTTAAAGTGATAAAAGACCACACAGATTTTAAAGTGGCGGAGTATTACAGAGACAAGGGGGTGGAGAATTGGACCGTGGAATGCTGGGAAAAGGAATTCAGCACTCAAGAAGTAATGGTAATGACACCTCAAATATTGTTGGATGCTCTAAGGAATGCTTTTTTAACACTGGACATGGTACGATTGTTGATTTTTGATGAGTGCCACCGT…	1644	RSYQIEVYKAALTRNTIAVLETGAGKTMIAVMLMKEIGRLIKENGDKGLIIFLAPQVSLVNQQFKVIKDHTDFKVAEYYRDKGVENWTVECWEKEFSTQEVMVMTPQILLDALRNAFLTLDMVRLLIFDECHRASGKHPYTRIMKEFYHTSDHRPKVFGMTASPVVRKGVSSARDCQGQIGELESILDSKVCTVEDRNELEQSVPSAKDINRFYGAKLSLHEDLKAKLKLSLAKFDTLVGQLHELPQFKDTDDMIKRLKKRLLSQHEKILYCLDHLGLICAHEAAQIYVESNCGTLDGCDYSKESFMQWRYFLKEVLHTIEETLPHVDEKIWKVKSALSDAVKMGYISPKLYELLQIFQSFGESRQVHCLIFVERKITAKVIQRFMEKLNFLYPLTVSY…
	446	UN001262	2073	ATGGGTGATGTTGAAATACCCATTTGGCTAAAAGGGCTGCCTTTTGCGCCTGAATACCACCCCACGGAGACCGAATTTGCAGACCCAATCGCTTACATATCGAAAATCGAGAAGGAAGCGAGCGCTTTTGGGATCTGCAAGATCATCCCACCACTCCCCAAACCCTCGAAAAGATATGTCCTTTCTAACCTAAACAAATCGCTGTCAAAATGCTCCGATTTGGGCGCAGATGCGCCCGGCTGTTCATCGTCGCAAATGGGTTCTGAGGATAGAGGGAATGAGGGGGAGGCTAGGGCAGTCTTCACAACTAGGCACCAAGAACTAGGTCTTTGTCCAAAGCGGTTGAAAGGGCCCGCGCCAATCCGGCAATTGGCCATTCAGAAGCAGGTTTGGCAGAGT…	691	MGDVEIPIWLKGLPFAPEYHPTETEFADPIAYISKIEKEASAFGICKIIPPLPKPSKRYVLSNLNKSLSKCSDLGADAPGCSSSQMGSEDRGNEGEARAVFTTRHQELGLCPKRLKGPAPIRQLAIQKQVWQSGQVYTLDQFESKSKAFARSHLSGVKEVNPLVVESLFWKAASEKPIYVEYANDVPGSGFGEPEGPFRYIRKRKRRRRFDRKYQERVGCEKPEVDHPIIDETFSADKAVPCLSTLLSDESSRLSMHKSLTTPSGSDKEGTAGWKISNSPWNLQVIAQSRGSLTRFMVDDIPGVTSPMIYIGMLFSWFAWHVEDHELHSLNFLHMGAPKTWYAVPSDYAFAFEEVVRVQGYGEHLDRLAALTLLGEKTTLLSPEVVVSSGIPCCRLVQH…
	447	UN001265	4866	GAAGAAATGGCAGCTCTTCCCACTCTTCACACATGCTCTCATGGCTTCTCTGGCAAGCCTTCTCTCTCTTCTGCAACAGCTTCCACTATCTTCCCTTCCAACATGTCTCTGGTTTTCGGAGATCTATCTTCTCTCTGTTGCAGATCGATAAGGACGAGGCAGAGACCTAAATCGGCTCGCAGAAGCCATGGATTGCATAGGAGTTGGCCTTTGGTGAGAGCGGCCGTCGATGCTCAACCGAGCGGTATAACTTCCAAGGAATCGGACGATCGCGTCAGAGTTGCAAAATTGGATGAGATAATATCTGAAAGAGGGGCTTGTGGAGTTGGTTTCATTGCAAATTTGCAGAATGAAGCATCACATGGGATAGTTACAGACGCTCTCACAGCTTTAGGCTGT…	1622	EEMAALPTLHTCSHGFSGKPSLSSATASTIFPSNMSLVFGDLSSLCCRSIRTRQRPKSARRSHGLHRSWPLVRAAVDAQPSGITSKESDDRVRVAKLDEIISERGACGVGFIANLQNEASHGIVTDALTALGCMEHRGGCGADNDSGDGAGVMTSIPWDLFNNWANKQGFASLDKLNTGVGMVFLPKDETNMKEAKAVIMDIFKEEGLEVLGWRPVPVNMSVVGYYAKETMPNIQQIFVKVSKESNIDDIERELYVCRKLIERAAQSKKWGDELYFCSLSNQTIVYKGMLRSEVLGPFYLDLQSDLYKSPFAIYHRRYSTNTSPRWPLAQPMRLLGHNGEINTIQGNLNWMQSREASIKSPVWRGRENEIRPYGNPKASDSANLDSAAELLLRSGRSPA…
	448	UN001267	2328	TTGAATATGGCTTCGCTGCCTCATTCTCCTGCTACAATTTCTAATACCTGTGCTTCGGATCTTCTCCGGAGCTCATTTAATGGTGTCAATGGCGTTCCTTTGAGATTTTTGGGGAGGAGACAGGAGATGGTGAGGCCTAGGGATTCTGCTATCGTAGCAAAGATCAAGAAGTGGAAGAAGAATGAATCTCCGTGGCCCGATGGGATCGATCTTGATCCCAATGTGAAGGGCGGGAATCTCAGTTATCTCTCGCATTTCAAGCCTTTGAAGGAGAAGCCGAAGCCGGTGACCTTGGCTTTTGAGAAACCGCTCAGAGATCTGGAGAAAAAGATTATGGATGTGCGAAAAATGGCTGATGAAACTGGGCTTGATTTCAGTGATCAGATAACTTCTTTGGAG…	776	LNMASLPHSPATISNTCASDLLRSSFNGVNGVPLRFLGRRQEMVRPRDSAIVAKIKKWKKNESPWPDGIDLDPNVKGGNLSYLSHFKPLKEKPKPVTLAFEKPLRDLEKKIMDVRKMADETGLDFSDQITSLETKYQQALKDLYTHLTPIQRLNIARHPNRPTFLDHVLKITDKWVELHGDRAGYDDPAIVTGIGSIEGRSYMFIGHQKGRNTKENIQRNFGMPTPHGYRKALRMMYYADHHGFPIVTFIDTPGAYADLKSEELGQGEAIAHNLRTMYGLKVPIISIVIGEGGSGGALAIGCANKLLMLENAVFFVASPEACAAILWKSAKASPKAAEKLKITATELCKLKIADGIIPEPLGGAHTDPSWTSQQIKIAVVETMNELLEMDTPKLLEHRM…
	449	UN001268	4857	ATGGAGTGGGCCACCGTCCAGCATCTCGATCTCCGCCACGTCGGCCGCGGCCTCAAACCCCTGCAGCCCCACGCCGCCGCATTTCACCCCAGTCAGGCCATCGTCGCCGCTGCAATCGGCTCTTACATCATCGAGTTTGATGCACTCACTGGAAGCAAGATCGCAGCGATAAACATTGGTGTGCCTGTTGTGCGCATGGCGTACAGCCCTACGAGTGGGCACGCTGTGATTGCTGTTCTTGAGGACTGCACAATCCGATCCTGTGATTTTGGTACTGAGCAGACTTCTGTGTTACATTCACCGGAAAGGAAGATGGAACCAATTTCATCTGATATGGAAGTCCATCTTGCACTGACTCCCCTCCAACCCGTTGTGTTTTTTGGTTTTCACAAACGGATG…	1619	MEWATVQHLDLRHVGRGLKPLQPHAAAFHPSQAIVAAAIGSYIIEFDALTGSKIAAINIGVPVVRMAYSPTSGHAVIAVLEDCTIRSCDFGTEQTSVLHSPERKMEPISSDMEVHLALTPLQPVVFFGFHKRMSVTVVGTVEGGRAPTKIKTDLKKPIVNLACHPRLPILYVAYAEGLIRAYNIQTYAVHYTLQLDNTIKLIGAGAFSFHPTLEWIFVGDRKGTLLAWDVSTERPNMIGITQVGSHPITSIGWIPMLRVLVTLSKDGTLQVWKTRVTVNPNRPPVQANFFEPAAIESVDITRILSHKEGEAVYPLPRIKCFVFHPKLNLAALLFVNVTSGDLKNKAAFTREGRKQLFAVLQSARGSTAAVLKEKLSSLGSSGILADHQLQTQLQEHHLK…
	450	UN001271	918	GGAAACATCGACATAATTATGCTGATGCTGCAACATGATGCTAACGTTGATGCTACAACCAAGGATATGTATACCCCATTGCATATCGCAGCTAAAGAAGGACAAGAAGAGGTGGCTCAGTTACTGGCGGAAAACAATGCGCAATTAGATACAGTAACCAAAAAGGGTTTTACTCCGTTGCATTTGGCTGCTAAATATGGTAAAGAAAAAGTCATTGCACTACTATTGCAGCGCGGAGCTAAAATCGATTGCCAAGGCAAGAACGATGTTACTCCGCTACATGTTGCAGCACATTTCGGTCATCAAAAGGTCATGTTTTTACTGCTTGAGCATGGGGCTTCTCCCCTACTTTGTGCAAAGAATGGCCATAGCGCTTTGCATATAGCTGCCAAAAAAAAT…	306	GNIDIIMLMLQHDANVDATTKDMYTPLHIAAKEGQEEVAQLLAENNAQLDTVTKKGFTPLHLAAKYGKEKVIALLLQRGAKIDCQGKNDVTPLHVAAHFGHQKVMFLLLEHGASPLLCAKNGHSALHIAAKKNEMEIAQQLLQFGADPDIRSKSGFSPLHLAAQEGQVDMVNLLLEHGVGVNVQAKNGLTPLHLCAQEDKAEIARILLDHQANISERTKAGYTPLHIAAHYGQINMVKFLLENDANIEMSTNVGYTPLHQAAQQGHTMVINLLLRHKANPNAIADNGQTALSIANNLGYITAVETL
	451	UN001276	186	AACGAACGACGACGAATGCAAAGCATCAATGCCGGTTTCCAGAATCTACGCTCGCTCCTACCACGCCACGAAGGCGACAAGTTGAGTAAGGCTGCGATTTTACAACAAACCTCCCAATACATCTACGAATTAGAAAACCAGAAGACACAGCTCTTAAACCAAAATAGTCAATTGAAGCGTCAACTC	62	NERRRMQSINAGFQNLRSLLPRHEGDKLSKAAILQQTSQYIYELENQKTQLLNQNSQLKRQL
	452	UN001280	4560	CAAATGGCTGCTGCGGTCAATATAGCTGTAGGGTCTGTTGTTTGGGTGGAAGACCCTGATATGGCTTGGATAGATGGGAAAGTTGTACAGGTCAATGGTGAAGAGATTAAGATCATCTGTACAAATGAGAAGACGGTTGTAGCTAATGTATCCAATGTCTATCCCAAGGATGCTGAAGCACCACATTGTGGTGTGGATGACATGACAAAGCTGGCTTATTTGCATGAACCGGGGGTGCTACAGAATTTGAAGTCCAGATATGACATGAATGAAATTTATACTTACACTGGAAATATATTGATTGCTGTAAACCCTTTTAGGAGATTACCTCATCTGTATGACAATCACATTATGAGACAGTACAAAGGGGCAGCATTTGGTGAGCTAAGTCCTCATCCT…	1520	QMAAAVNIAVGSVVWVEDPDMAWIDGKVVQVNGEEIKIICTNEKTVVANVSNVYPKDAEAPHCGVDDMTKLAYLHEPGVLQNLKSRYDMNEIYTYTGNILIAVNPFRRLPHLYDNHIMRQYKGAAFGELSPHPFAVADAAYRLMMNEGISQSILVSGESGAGKTESTKMLMRYLAYMGGRAVVEGRTVEQQVLESNPVLEAFGNAKTVRNNNSSRFGKFVEIQFDQRGRISGAAIRTYLLERSRICQVSNPERNYHCFYMLCAAPQEDIKKYKLGNPRKFHYLNQSNCYELDGVDDSKEYQATRRAMDVVGISYDEQESIFRVVAAILHLGNIKFSKGKEMDSSAPKDENSWFHLRTAAELFMCDVKALEDSLCKRVIVTRDETITKSLDPESAVLSRD…
	453	UN001295	4497	AATTATGTTCTAGATGAAGATGACTATGAATTGCTTCAGGACAACAACATTACTGGCTTCCATCGGCCCAAACCTGGGAGCAAAAAATTTAAGCGTCTGAAGAAAGCGGGGAGGGACAGTGAGCTGGAAGAGAGGTCTGGGTTTTCTGATGAAGAGGAAGTGGATAGAAGTGGCCGAAGTGGGCGAACTGCTGAAGAGAAACTCAAGCGAAGTTTGTTTGGTGATGATGAAGGTGCTCCGCTTGAGGATATTGCTGAAGAAGAAGAGCCACCTGAAGAAGAAGAAGATGTGGATATGGGTGAAGATGATGAAATGGCAGACTTTATTGTGGAAGAAGATATTGATGAGAATGGTGCTCCTGTGAGGAGGAGGAAACCTACCAGAAAGAAGTCCAGGCAG…	1499	NYVLDEDDYELLQDNNITGFHRPKPGSKKFKRLKKAGRDSELEERSGFSDEEEVDRSGRSGRTAEEKLKRSLFGDDEGAPLEDIAEEEEPPEEEEDVDMGEDDEMADFIVEEDIDENGAPVRRRKPTRKKSRQAPGVSSSALQEAHEIFGDVDELLMLRKQGLAKGASYDDSGEWREKRLEDEFEPLILSEKYMTERDDRIREIDVPERIQLSEEITGHVPTDDKSIEEEISWIHYQLTVSEMSPFFGKMHLIGEINREDIGNVLGMLHVQKFDIPFIAMYRKELCLSLLKDPEQDVANNEDRVDRTPRLKWHKKLWAVQNLDRKWLLLQKRKNALQLYYNKRFQEETQRLDDETRLALNKQLFKSITESLKAAESEREVDDVDSKFNLHFPPGEVGAE…
	454	UN001296	4593	ATGGCTGCTCCAGTCAACATTGTTGTAGGATCTCATGTATGGGTTGAAGATCCAGTGTTAGCTTGGATTGATGGAGAGGTTTTCAGAATCAATGGTCATGCGGTCCATGTGCACTGTACAAATGGAAAAACGGTTATTGCAGATTTGTCAAAGGTGTTCCCCAAGGATACTGAAGCTCCGCCCGGTGGTGTGGATGACATGACAAAGCTTTCATATTTGCACGAACCAGGAGTATTACAAAACTTGGCCACCAGATATGAACTTAATGAAATCTATACCTACACCGGTAATATTTTGATTGCAATAAATCCATTTCAAAGACTGCCTCATCTGTATGATACCCACATGATGGAACAGTACAAAGGAGCCACATTTGGAGAGCTAAGTCCTCATGTTTTT…	1531	MAAPVNIVVGSHVWVEDPVLAWIDGEVFRINGHAVHVHCTNGKTVIADLSKVFPKDTEAPPGGVDDMTKLSYLHEPGVLQNLATRYELNEIYTYTGNILIAINPFQRLPHLYDTHMMEQYKGATFGELSPHVFAVADVAYRAMINEGKSNSILVSGESGAGKTETTKMLMRYLAYLGGRSGIEGRTVEQQVLESNPVLEAFGNAKTVRNNNSSRFGKFVEIQFDKNGRISGAAIRTYLLERSRVCQISDPERNYHCFYLLCAAPPEDIEKYKLWNPKSFHYLNQSNCYELDGVNDADEYLSTRRAMDIVGISEQEQEAIFRVVAAVLHLGNIEFSKGNDIDSSVIKDEKSRFHLQMTAELLMCDAQSLEDALIKRVMVTPEEVITRTLDPASAIVSRDG…
	455	UN001297	3729	ATGAACGCAGTTGGGAGGTTCATAACTCAGAGCGTTTATACAGTTTCAGGCCCTTTTCACCCATTCGGAGGAGCTGTTGATATCATCGTTGTTGAGCAGCAAGATGGGAGCTTCAAGTGCAGTCCTTGGTATGTCAAGTTCGGGAAATTCCAAGGAGTGTTGAAGACAAGGGAGAAGATTGTTAATGTAAGTGTTAACGGAGTTGAAGCTGGTTTTCACATGTACCTGAATCATAAGGGTGAAGCTTATTTTCTAAAGGAAGCAGATGGTGGGGAAGAGAACAGCGACTTCCTGTCTTTGTCTTCCGGCAACAAGACAGATGAGCAACCACAAAATGGAAGGATGAAGAAAGCTGAGAGCCTCAATTTAGATGATGCTCGGTCGAATCAGGCTACTTAT…	1243	MNAVGRFITQSVYTVSGPFHPFGGAVDIIVVEQQDGSFKCSPWYVKFGKFQGVLKTREKIVNVSVNGVEAGFHMYLNHKGEAYFLKEADGGEENSDFLSLSSGNKTDEQPQNGRMKKAESLNLDDARSNQATYVNMSNEKIVVRTNSRRSRIFGLMFGQKSVKDGDRIRKGNISMERISSLERAEIAADLLEMKWSTNLPTKNWKLKNASSSKPSASETAVVEVNKVVEVSVEEXLVXNVKVSVIEXLPRL*LEILMIXWCLKSHEXSFSATHFGG**FC*FPRDHF*AISS*N*RSW*RECWF*RDGKAISSSN*LS*SGRGLKRXHSSDFAHSNTGQVSDRGDFHIKHYGFGEXNAKRGEFLPTSIVACQEDPVLRLMFTVEM*ILIL*TFLAESIR…
	456	UN001302	1827	TATGAAGCCGAAAGTCCAGATGAGCTTGCGCTGGTGAATGCTGCTTACAGCTACGACTGTTGCTTGGTCAACCGGAGCCCGAATCACATATTAGTAAGCATTCCAAACTCAGGTATGGTGGAGTATGAGGTACTAAAGATTTTACCCTTCGATTCGAGTCGCAAGTGCATGTCAATCGTTGTGCGTCGCACTGGAACACAAGAAATTATACTTTATGCAAAGGGCGCCGACAGCTCTATTATGCCTGTTTTAGTGCCATGCCCGCCAAACACTCCGGAAGGTCTAATGCGAGAAAAGGCGCAACAACAATTGGATCGTTACGCGCGAGAAGGCTTGCGCATATTGGTGATGGCAAAGCGTATACTCAATCCCTCAGAGTACACCGAATGGTGGGCACGA…	609	YEAESPDELALVNAAYSYDCCLVNRSPNHILVSIPNSGMVEYEVLKILPFDSSRKCMSIVVRRTGTQEIILYAKGADSSIMPVLVPCPPNTPEGLMREKAQQQLDRYAREGLRILVMAKRILNPSEYTEWWARHQEIEMSLENRERRIRDSFAKLESNLTLLGATGIEDRLQDGVPETIASMLSAGISLWVLTGDKPETAINVAYSAKLFTQQMELIRLTARSRDAAESAINFYLAELDNSKSSYDTRLKPRALVVDGKTLTFILDLRSKLIRPFLRLANSCASVLCCRSTPLQKAYLVKVVKEELRLCTLAIGDGANDVSMIQMADVGVGISGQEGMQAVMAADFTLSRFRYLEPLLLTHGYWCYDRLSRMILYFFYKNAAFVFLIFWYQLYCGFSGS…
	457	UN001303	726	GTAAGCAACAAAGTTTCAGCAAAGCAACCAAAAGAGGAGTCTCCAGTTGGTTCCATAATTTCTGATGTTGTTGTAAAAAAAGTAACAAAAGTTGCTCAAATAGTTTTCAATACACAGAAAGCGAAAATAAATTATACGTTTACAGCGCAGATGTTAAATAAATTAGTCGACATACTGGAAAAGCTAAGTAAGGATGCTGAATGCAATGCTGTGGTGATCACAACAGATGCGCCCAATTTTTGTTACGGCGTTGACTTTACGGACTTAACTCTTGGCCCCATGGAGAAACGCAAACAAACAGCAGTACATTTAGCATTGGCGGTTAAGAACTATTTGAAAATGTTGGCTACATTTCCGAAGCCATTGATTGCTGGTGTTAATGGCAGCAATATTGGATTG…	242	VSNKVSAKQPKEESPVGSIISDVVVKKVTKVAQIVFNTQKAKINYTFTAQMLNKLVDILEKLSKDAECNAVVITTDAPNFCYGVDFTDLTLGPMEKRKQTAVHLALAVKNYLKMLATFPKPLIAGVNGSNIGLGVMQLPLFDIVIGSDKGSYETPYVKIGQVPEGYCIWNKITKIRDNYKTKLFWLGEKLHSTESALSGLVHKLTASAKVNDDALLAAKKIAMMSTESYRCMKKTVIDNHFE
	458	UN001306	558	CCCGACTACTATGACATTATTCAAAATCCGATTGACATGAATACGATTGATCATAATATACGTTGCGATAAATATGCTACAGTAGAAGATGTCGTGGCGGACTATCGACTTATGTTTTCTAATTGTAGACAATATAATGAAGAAGGATCCAACATATATGAAGATGCTAATAATTTAGAAAGGGCATTGAATGAAAAGTTAAAAGAATTTCCTGGTTTGGCGGATATAAAGAAACCGTTACAGAAATTGGCGAAACCTAGTGGCCGTAAAAAGACAGCAGTGGTTGATAAACTATGGCAATTTTACGAGACAATAAGGGAATACCAAGAACCAAAAGGAAAACGACAGCTGTCATTAATATTTACCAAACTTCCCTCGAAAAGTGAGTACCCAGATTAC…	186	PDYYDIIQNPIDMNTIDHNIRCDKYATVEDVVADYRLMFSNCRQYNEEGSNIYEDANNLERALNEKLKEFPGLADIKKPLQKLAKPSGRKKTAVVDKLWQFYETIREYQEPKGKRQLSLIFTKLPSKSEYPDYYDIIKEPIDMERIAQKLKQGSYETVDELGADFLLMLENACKYNEPDSQIYKDA
	459	UN001309	1296	ATGTTTTGGGACAAAAGTTATACACCGTCACAGAATATAGAGGCGCTGCTGGAGAAAGAGAACGTTACAGTGGAGGAATTTCTGGACGATGATGACATATTACTGGAGTGTAGATCACAAAAAAAAACTATTGTTAATTATTTCACTCGTCCTGATGTAATAAAGCGCCTTGTTGAACTCATTACAACAGAACCATCTGAGAATCTACCTTTGGCACAAAGATATCGACATGCAAATATGGCTTGTGAAATTTTAACGTTTGGTTTACCGTCCCTAGATGAGAAGCTTTTGTCAGATGAAGATATATTAAAAACACTTTATTCATATCTGGAAAACGAACCACCGCTGAATCCTTTGCTATCGTCATTTTTTAGCAAAACATTTAGTATGCTCTTCACA…	432	MFWDKSYTPSQNIEALLEKENVTVEEFLDDDDILLECRSQKKTIVNYFTRPDVIKRLVELITTEPSENLPLAQRYRHANMACEILTFGLPSLDEKLLSDEDILKTLYSYLENEPPLNPLLSSFFSKTFSMLFTKKAEQDWFLYQQMCLKLLEYIKSQNNFLDLICKHFFTPVIPDLIMQMMRDVEGGQMKRNLYEWLTGDKLVERLIAIIGNPQETDKHTNVAEFLCDLIQQGRSMRYLEQENDTFEPTFDGSNPILKSIESERNVEALLNVILEPNAQESAIVSGISVVLILLKPVVFTEEPNSDRMKIIQDREKECSEQILSTVIRVIAPRLKDFNELLRNPPNKPEIVTTAAKLSQPFGMTRLQICRIFTVLLQTKNEEILNTVCETDFFETLLTL…
	460	UN001311	1368	CTTGAATTGCTTGACTATGCATATCCAGATCCAGCCGTACGAAGTTTCGCCATACGCTGTCTCCGTTTCCTTAGAGATGAGGAATTGCTGCTATATCTTTTGCAATTGGTGCAGGCCATCAAACACGAGTCTTATCTGGATTGTGATCTGGTAACATTTCTGCTGGAGCGTGCTTTGCGCAACCAACGTATTGGCCACTATTTTTTTTGGCATTTGCGTTCAGAAATGCAAACACTCTCGATGCAAACACGATTTGGGCTTTTGCTCGAAGGGTATTTAAAAGGCTGCAAGCCGCATGTGCCGCATCTTTGTAAGCAGCTAAAAGTGCTCGATGCACTCAAAGCCGGTTCGTTGATCGCAAAAAAGGGAAGTAAGGAAAAAGGTCGCAAAGAGATGCAA…	456	LELLDYAYPDPAVRSFAIRCLRFLRDEELLLYLLQLVQAIKHESYLDCDLVTFLLERALRNQRIGHYFFWHLRSEMQTLSMQTRFGLLLEGYLKGCKPHVPHLCKQLKVLDALKAGSLIAKKGSKEKGRKEMQDFFSSQSNSSIFQSIQNPLNPSFRCKGIQPDKCKVMDSKMRPLWIVLKNADQSCNDIYIIFKNGDDLRQDMLTLQMLRVMDQLWKNEGMDFRMNIYNCISMERRLGMIEVVLNAETIANIQKEKGMFSATSPFKKGSLFSWLKEYNRTEEEMNKAINEFTLSCAGYCVATYVLGVADRHSDNIMVKRNGQLFHIDFGHILGHFKEKFGVRRERVPFVLTHDFVYVISKGRNDRDSEEFLYFQNMCEKAFLVLRKHGCLILSLFSMM…
	461	UN001318	327	GAGAAAAAATTTCTCTGTGCATTTTGCGGTCGCGCTGTGAGTTCATCATCTAACTTGATCGTTCATATGCGACGCCACACTGGGGAAAAGCCTTTTCAATGTGAATTCTGCGATAAAGCGTTTCCTCGTTCCTCAGATTTAGCTTGTCACCGCCGTACCCACACAGGCGAAAAACCGCATCGTTGCACTGTTTGTGACAAATCCTTTTCACGTTCATACAAGTTGCACACACACATGCGCATACACTCTGGTGAAAGGCCGTACAAGTGCTCCTATTGTGAGAAGAGTTTTACTCAGTCTAATGATCTTGCACTGCATGTTCGCCGG	109	EKKFLCAFCGRAVSSSSNLIVHMRRHTGEKPFQCEFCDKAFPRSSDLACHRRTHTGEKPHRCTVCDKSFSRSYKLHTHMRIHSGERPYKCSYCEKSFTQSNDLALHVRR
	462	UN001320	4536	CAAATGGCTGCTGCGGTCAATATAGCTGTAGGGTCTGTTGTTTGGGTGGAAGACCCTGATATGGCTTGGATAGATGGGAAAGTTGTACAGGTCAATGGTGAAGAGATTAAGATCATCTGTACAAATGAGAAGACGGTTGTAGCTAATGTATCCAATGTCTATCCCAAGGATGCTGAAGCACCACATTGTGGTGTGGATGACATGACAAAGCTGGCTTATTTGCATGAACCGGGGGTGCTACAGAATTTGAAGTCCAGATATGACATGAATGAAATTTATACTTACACTGGAAATATATTGATTGCTGTAAACCCTTTTAGGAGATTACCTCATCTGTATGACAATCACATTATGAGACAGTACAAAGGGGCAGCATTTGGTGAGCTAAGTCCTCATCCT…	1512	QMAAAVNIAVGSVVWVEDPDMAWIDGKVVQVNGEEIKIICTNEKTVVANVSNVYPKDAEAPHCGVDDMTKLAYLHEPGVLQNLKSRYDMNEIYTYTGNILIAVNPFRRLPHLYDNHIMRQYKGAAFGELSPHPFAVADAAYRLMMNEGISQSILVSGESGAGKTESTKMLMRYLAYMGGRAVVEGRTVEQQVLESNPVLEAFGNAKTVRNNNSSRFGKFVEIQFDQRGRISGAAIRTYLLERSRICQVSNPERNYHCFYMLCAAPQEDVERYKLENPRRFHYLNQSNCYELDGVDDSEEYLATRKAMDVVGISGDEQESVFRVVASILHLGNIEFKKGKEIDSSEPKDENSWFHLRTAAELLMCDVKALEDSLCKRVIVTRGETITKSLDPESAVLSRD…
	463	UN001321	1506	ATGGGTGAGGAGATTGAATCTCTTCACAAGAATCAGACTTGGGAGTTGGTAAAACCTCCGAAAGGCCAGAAGATTGTTGGATGCAAATGGGTCTTCAAGAAAAAGGAAGGAACTCCAGGGGTGGAAGAGACTAGGTTCAAAGCACGACTGGTTGCAAAAGGCTATACTCAGAGGGAGGGTGTTGACTTCAATGAAGTGTTCTCTCCTGTGGTGAAGCATAGTTCTATCAGGGTGCTACTTGCTATGGTTGCTAAATTCAATTTAGAGTTGGAGCAGCTTGATGTCAAGACTGCGTTTTTACATGGCGAGCTAGATGAACAGATTTATATGCATCAACCAGAGGGGTTTGAAATTCATGGAAAGGAAGACCACGTTTGTTTGCTAAAGAAATCGTTGTAT…	502	MGEEIESLHKNQTWELVKPPKGQKIVGCKWVFKKKEGTPGVEETRFKARLVAKGYTQREGVDFNEVFSPVVKHSSIRVLLAMVAKFNLELEQLDVKTAFLHGELDEQIYMHQPEGFEIHGKEDHVCLLKKSLYGLKQSPRQWYKRFDTFMVGNGYCRSAYDNCVYHKKHSNGSYVYLLLYVDDMLIAAKDMSEINRLKTQLSGEFEMKDLGAAKKILGMEIQRDRKEGKLSLSQKGYLEKVMECFDMQSSKPMNTPLAAHFKLSAALSPQTEEEVEHMSRVHYASAVGSIMYAMVCTRPDISHAVSVVSRYMDNPGKAHWQAVKWIFRYLRGTTDVGIIYDRSNNTSGSVIGYVDSDFAGDLDRRRSLTGYVFTFASGAISWKAALQSKAVLSTTKAEY…
	464	UN001324	3891	ATGGCTGAGGAGAATGGTTTGGATGGGAACATCAGCTCAAATCAAGCTGCATCAACGAGCAAATCCACAACAATCCTTGATAAGAACGTGGAAAAGGCACACAATCAACAAGATTCAGAAAAGAGCAAAGGAGAAGAAGATGACAGCAACAACACCGTTCCATTTTACAAATTGTTTGCATTCGCAGACTCTACAGATGTTTTCTTGATGATTGTGGGCACAGTCGCAGCTGTTGCAAATGGGGTCGCCTTGCCTCTGATGGCTCTTCTCATGGGTGAAGTGGTTAATGCTTTTGGAGGAACTGCTAACAACCATGATGTTGTTGAGAAAGTTTCCAAGGTGTCTCTGAAATTTACTTATTTGGCTGTGGGATCGGGTCTGGCATCATTCCTCCAGGTG…	1297	MAEENGLDGNISSNQAASTSKSTTILDKNVEKAHNQQDSEKSKGEEDDSNNTVPFYKLFAFADSTDVFLMIVGTVAAVANGVALPLMALLMGEVVNAFGGTANNHDVVEKVSKVSLKFTYLAVGSGLASFLQVACWMITGERQAARIRNLYLKTILRQDIAFFDKETNTGEVIGRMSGDTVRIQEAMGEKVGKFIQLVSTFIGGFVIAFVQGWLLTLVMLASIPPIVVAGAAMTIMVSKMASRGQTAYAAAGVVVEQTIGSIRTVASFTGEKQAIEKYGRSLNSAYKSSVQEGFAAGLGLGSVLSLLFCSYALAIWFGSRLILSKGYTGGDVINVIIAVLTGSMSLGQASPSLSAFAAGRAAAFKMFETIKRKPEIDAYDTRGRKLDDIRGDIELRDVY…
	465	UN001327	522	CGACGTGTGCCAACCTCTAAACCGGGTGCGCTCTTTGGTGCCAAAATGAGTCAAGTTTTGAAGCGGGAAAAGCGTGACATTCCTTTTATAATCAGTGCCTGCATACGTGAAGTAGAACGACGTGGCATGTCTGAAGTTGGTATTTATCGCGTGAGTGGTTCTGCTTCTGATTTGGCTAAATTGAAGAAGTCTTTTGAAACAAATGCGTATGAGGCCGAGCAGTTGTTAAAAGATGTGGATATACACTCCGTTACGGGTATTTTGAAGTCGTATCTACGAGAGTTACCAGAAGCGTTGTTCACTGATGCCCTCTATCCGAAATTCTTTGAAACATTTAGCGCTTTTAGCAACAACAACGAGGCAGCACGTATAAATGAACTCACAAAAGTATTTGAAGAA…	174	RRVPTSKPGALFGAKMSQVLKREKRDIPFIISACIREVERRGMSEVGIYRVSGSASDLAKLKKSFETNAYEAEQLLKDVDIHSVTGILKSYLRELPEALFTDALYPKFFETFSAFSNNNEAARINELTKVFEELPLANKASINHILDHLIRVHHQEADNKMSLHNLAMVFGPTL
	466	UN001328	939	TGGATGAAACGAAGNATGCCCTTCAAAAACCTCCATAGCAGGGAATACCAAGGTCATAAGAAGAAGGTGCATTCTGTGGCTTGGAATTGTACAGGCACGAAGCTTGCCTCTGGTTCTGTTGATCAGACTGCTCGTATTTGGCACATTGAGCCTCATGGCCATGGCAAGGTTAAAGACATTGAATTGAAAGGGCATACAGATAGTGTTGATCAATTATGTTGGGACCCCAAACACGCTGATCTAATTGCAACTGCTTCGGGTGACAAGACTGTTCGCCTTTGGGATGCTCGTAGTGGAAAGTGCTCTCAACATGTAGAACTTAGTGGCGAAAACATCAACATTACATACAGACCAGATGGAACACACATAGCTGTTGGAAATAGGGATGATGAACTGACA…	313	WMKRXMPFKNLHSREYQGHKKKVHSVAWNCTGTKLASGSVDQTARIWHIEPHGHGKVKDIELKGHTDSVDQLCWDPKHADLIATASGDKTVRLWDARSGKCSQHVELSGENINITYRPDGTHIAVGNRDDELTILDVRKFKPIVKRKFNYEVNEIAWNTTGEIFFLTTGNGTLEVLDYPSLRVLHTLMAHTAGCYCIAIDPIGRYFAVGSADALVSLWDLSEMLCVRTFTKLEWPVRTVSFNYTGEYIASASEDLFIDISSVQTGRTVHQIPCRAAMNSVEWNPKYNLLAYAGDDKNKYQADEGVFRIFGFES
	467	UN001331	4710	ATACAAGGCCTCGAAAAAGGTCACTTGTGGAGTGCTTAGATGGTAGTTCCGTGGACACATACAAATTTCGAATTTTGTTGCCTAGCGGTGGAATCACGGACCTAATTCTGCGTGCCTGAGCCAGTNATGTTTATGGAAGAATTTGTTGGTTATGTAAGAAGAGAGTTCGAGAGATGTGAAAAAAGTTCAGCAGATCCAAAGCCGAGTATCATGTGGGATGCTGATATTTATCTTGAAGATATGTCAGAAAACAAGATCAAGAGGAGATTAATTTTTAATCACTTCAAGACCAATAAATTGCACATTCTGAGGTTGCATGATGGAACAGGACAGAATGTTAATACTTATAAGAATATGTGGGATTTGACACCTGATACCGAACTGCTTTCCGAGCTTCCA…	1570	IQGLEKGHLWSA*MVVPWTHTNFEFCCLAVESRT*FCVPEPVMFMEEFVGYVRREFERCEKSSADPKPSIMWDADIYLEDMSENKIKRRLIFNHFKTNKLHILRLHDGTGQNVNTYKNMWDLTPDTELLSELPAEYTFETALADLIDNSLQAIWSNGVGERRLVSVTVDEQGILIFDTGAGMDGSDENSIVKWGKFGLSNHRSSRGLAIGGKPPYLMPLFGMFGYGGPIASMHLGRRALVSSKTKESKKVYTLFLEREALLNKCVWRTDGGIRSSFEDEIQLSSHGSFTKVEIQELKTRSLETSQLQCRLKDIYFPYIQCDDMLSSRKTTMPIEFQVNGVNLAEIDGGEVAVTNWHSCNGPEFVLQLRFVKQGADASGISGSRKLQEANARLKCVYFPI…
	468	UN001333	3822	ATGCAGGCTGTTGGAAGGCTTAGTAGCTATATAAGTAGGGGTGTTTATACGGTTTCAGCTCCTTTTCATCCTTTTGGAGGAGCTGTGGACATTATCGTTGTCCAGCAGCAAGATGGTAGCTTCAAATCAAATCCCTGGTATGTCAGGTTTGGGAAATTTCAAGGGGTTTTGAAGACAACGGAGAAGGTTGTTAGCATAGGTGTTAATGAAACAGAAGCTGGTTTTCACATGTACTTGGATCATACAGGAGAAGCGTTCTTTCTCAGGGAGGTGGAAGGTGATGAAGGGGACGACGCCTTCTCCCCTCCATTGTCTGGTGATGAGGTTGATGAGCNNAAGTGGAGAATGGAAGGTTGTCTAAGTCTCAAAGCCTTGACATTCACAGTAACCAGTCAAAAG…	1274	MQAVGRLSSYISRGVYTVSAPFHPFGGAVDIIVVQQQDGSFKSNPWYVRFGKFQGVLKTTEKVVSIGVNETEAGFHMYLDHTGEAFFLREVEGDEGDDAFSPPLSGDEVDEXKWRMEGCLSLKALTFTVTSQKQLLRLTQAMGRSWRGRIQGGLGFLVSCLDGSQ*MKVARIVKEMLTCEG*VP*SVRRLLQTS*M*NGRLIFTLIIRGRMILPAYLPPRYRLKWLIMFRLVQKAWEVRIMVLHSLLRMKRGVPMMM*EIEVLGVAKWMQSALMR*GVQITSAL**PMSKFYLNRHHQVI*QIEMKQCLRILHGKLLLVLMR*GCSQLLRP*FWNCKILIL*SWMRVVVLI**CLILLTPL*NWHLMTRTTI*QVMVRRVKRIAFQRRKAKRREFLHAS…
	469	UN001337	1884	AGTGCATATTTTCATCAGCAGAAGGGCTTACCAGCTCAGGAACAATTATCTCGCCGCCTAGCATATGGGCCAAATGAAATAACTATTCCTTACAAAGACTTCAAGACTCTCTTGGTTTTGGAAATGTTGAATCCATTCTACGTTTTCCAAATATTTTCTGTAATATTGTGGTTTACGTATGACTACTATTATTATGCCTGTGTAATACTGCTCATGTCAATGTTTGGAATAGCTATGTCGATTATTCAAACTAAAAAGAATCAAGATTCTTTGCGTGAAACTGTAATGAATACCGGTTGTGCTTTGGTTGTAACAGAGTCTGGTCAAGTTCGGGAAATACCTACCGAGTGCTTAGTTCCTGGCGACATTATTGAGATACCCACAAGCGGATGTACGATG…	628	SAYFHQQKGLPAQEQLSRRLAYGPNEITIPYKDFKTLLVLEMLNPFYVFQIFSVILWFTYDYYYYACVILLMSMFGIAMSIIQTKKNQDSLRETVMNTGCALVVTESGQVREIPTECLVPGDIIEIPTSGCTMQCDAVLLSGNCILDESMLTGKHQDAYHKLEEKLSQPPI*TCESVPVTKTPLPMKVDLIFDKKEHARHTLFCGTKVIQTRYIGSEKVLAIVINTGNITTKGGLIRSILYPPPVDYKFEQDSYKFIEFLGLIAIIGFVYTLITKIMRGIEPVKIAVESLDLITIVVPPALPAAMTVGRFYAQKRLQKKNIYCISPRSINVAGSIDCCCFDKTGTLTEEGLDMWGVVPKTVTNEFQMPIKQIKRLPYDNFLFGMATCHSITIMNGKLMG…
	470	UN001343	222	TGCCAGAAGTGTCAATTGCCGGTGTTTCTCGCTGAACGCCTATTGGTCGGCAAGAAAGTTTATCATCGCACTTGTCTGAAATGTGCACGTTGTGGTTCCCAACTCACACCAGGTAGCTTCTATGAGACCGAAGTGGACGGCGAATACTGTTGTGAAACATGTCCTGATGAGGAGACGCTACTGAACTCAGCCACTGGTGTTGAATTGGCAGCAGGTGGTGTG	74	CQKCQLPVFLAERLLVGKKVYHRTCLKCARCGSQLTPGSFYETEVDGEYCCETCPDEETLLNSATGVELAAGGV
	471	UN001344	990	AAGGTGCCATTTGTGATTACGAGTTTCATGGCTTTGAGGCAGAAACTTCATCATTGGGTAAACTTGAATAGTTGCTTCATGCATTCCAGATTTTACAGCACAAAAATTGATTGGAATAAGCTTCGGCCAATGATTCTTAAAAGAATAAAAGAGAGGGCTAAGGACTATCCTGTAAGAAGTATGGTACCCGTTGCACATGATGTCCTTAATGCTAGAGCACTTCTTATTGAAGGTGTCTCTACACTTCTCAATACTATTCCAATCAAGGCATGCAAGTTCTGCCCTGAGGTGTATGTTGGTGACAGAGGCCATCTGATTAAGACTTGTCATGGCTACAAGCGCACTAACAAACACAAGGTCCACACCTGGACCATTGGCAGCTTGAATGATATCCTCATC…	330	KVPFVITSFMALRQKLHHWVNLNSCFMHSRFYSTKIDWNKLRPMILKRIKERAKDYPVRSMVPVAHDVLNARALLIEGVSTLLNTIPIKACKFCPEVYVGDRGHLIKTCHGYKRTNKHKVHTWTIGSLNDILIPVEAFHLRHMFQDVIKHEQRFDFDRVPAVLELCFQAGADIHEENLFHHGQRPDDHKCDRXDDLSRSPDELRSVAQRTVEAWERMRLGVQKLLLVYPAKVCQYCSEAHIGPSGHKARLCGVFKYETWKGTHFWKKAEVDDLVPPKVVWRRRPQDPPVLLDNGRDFYGHAPAVVELCLQAGAIVPSKYYCMMKVNGLRP
	472	UN001354	5040	ATGGCAGAGCGCAAGGTCGATCTTCCCGAAGACCTGCTCGCTTCGAGATTGCCTGATGAGCCGTGGGCTGCCAAAGATGATATTTGTGGAGGAAATTATGACGAGAAGGTGATTATGGGGTTCCTTGATGATTCCAAGGATCAAGTCATATCTGAGAACAGTATACCACTTTCCCCTCAATGGTTGTATTCTAAACACACTGAAAGTAAGGCCAATCTAGTGGCTACGTCTGGGGAAATGCGTACACAGAATTCTTTACCTCATGGAAACTCCTTTGATCCTGCTCAAAAAGAGGTGCGGCGCTTGGATGGATTTCATGACAAGAAAGAATGGCGAAGGAATGCACCTGAGCCTGAAAATAGTCGCCGCTGGCGTGAAGAGGAGAGAGAAACTGGTTTG…	1680	MAERKVDLPEDLLASRLPDEPWAAKDDICGGNYDEKVIMGFLDDSKDQVISENSIPLSPQWLYSKHTESKANLVATSGEMRTQNSLPHGNSFDPAQKEVRRLDGFHDKKEWRRNAPEPENSRRWREEERETGLLGRKDRRKEGDEYRKSDRRTDNASVREASETRALPSSDRWHDVNSRSSGHDSRRDSKWSSRWGPEDRDKDSRAEKKPDADKEDSHNEKQAFVVGNRIASERESDSRDKWRPRHRQEVHSGGSAVYRAAPGFVLERGRLEGSNTGFAPGRGRSNSIGSAYSRPFSVGPIGSAPPDKNELILGKSGISSPTFCYPRGKLLDIYRKHKHIPYFDSVPDGFEEVPPITQLGCIEPLAFVAPDAQEEAALEDIWKGKVTSSGEFYDATGDK…
	473	UN001357	4710	TGAGATGCCAGTCGGTGGCGTGTCTTTGGTGGCGTGGGGCTCCTCCCCTTCACAGAGTAACCGCATCGGCGGCCTTGAACCAGCCTCCGACCCTCTACACCGGCGGATCTGATGGCTCCATCATCTGGTGGAATCTCTCCAACAACCAAAAGGAAATATGGCCGATGGCAATGTTATGTGGCCATACTGCAGCCATTGCTGATCTAGAGATTTGTATGCCTGTCATAGGCCATGGAGAAATGGAGGATTCAAGTAATGTAGACTCTATCCCAGCTGCTTCTAGTGCACTAATAAGTGCATGTACTGATGGTGTCTTGTGCATATGGAGCAGAGGCAGTGGGCATTGCAAACGCAGAAGAAAATTGCCTCCATGGGCTGGAATTCCATCTAGGCTGTCAA…	1570	*DASRWRVFGGVGLLPFTE*PHRRP*TSLRPSTPADLMAPSSGGISPTTKRKYGRWQCYVAILQPLLI*RFVCLS*AMEKWRIQVM*TLSQLLLVH**VHVLMVSCAYGAEAVGIANAEENCLHGLEFHLGCQHCLCPRGMFALLATVLMLHNQPTMQLKLLKRVTVAIIRMIL*SIKKPITEGC*SVLLSLLIHALLILFRLYFMEAYPLGH*SL*P*FHLWRIWKGN**F*QMYLERYNQLKYQSPILMVMVGVDCREIRHMYGQLLEQTLHMMQYRKYQ*QPMEILWFLYLGPSAYLSQQPMGLLLEKSL*LTVLFVMKEHF*WAACFFQVVLVAMH*MSRTRRKVF*KTF*CGVIQALR*CTPYHLWVIHFTLSLNVNYPLFPILMTEK*QLISV…
	474	UN001363	924	GTACGCTCACAAGCACTGCGTTCGATTTTGTGCTTAGGGGAACGCGGTGCTACCTTATCACCAAATCTCTATCAACGAGCTGTGGAAGCAATGAAAGACGACTACGAATGTGTACGGAAAGAAGCTTTACAATTAGTTTTTCAACTTGGTGTAAGCCATCCGGATCACATGATAGCTAGTGGCGGAGATGAAGACGAGGAAATACGTTTAATCGATGCAGCGTTTGGTAAAGTCTGTGGAGCACTCTGCGATCTTTCCATACAAATACGTACACAAGCTGCAGAACACTTAGGTCTCATGACTCAAGTCAGCTCTGAATTCCTGCATCAGACGCTCGACAAAAAGTTAATGAGTAATTTACGTCGTAAGAAAACGGCCCATGAGCGTGGTGCGCAGCTG…	308	VRSQALRSILCLGERGATLSPNLYQRAVEAMKDDYECVRKEALQLVFQLGVSHPDHMIASGGDEDEEIRLIDAAFGKVCGALCDLSIQIRTQAAEHLGLMTQVSSEFLHQTLDKKLMSNLRRKKTAHERGAQLVASGEWSTGKRWADDAPQERLDSKSISLVASGACGALVHGLEDEFLEVRTAAVDSMCKLALSNPDFAVTCLDFLVDMFNDEIEDVRLKAIYSLTAIARHIVLREDQLEIMLSSLEDYSVDVREGLHLMLGACRVSTQACLLMVVQKLLDVLSKYPQDKNSTFGCMRKIGQKHPNL
	475	UN001365	5379	TGGCCGAAAGAACCAATGTCGACTCTCACCCCCATCTCTCCTTGTCCGCTCTTCCCCAGATCTCCAAAGAAATGCAAGGGCCTGATGGTTCCATTCCTCTTTCACCGCAGTGGCTGCTGCCAAAGTCCGGGGAAAATAAGTCTGGAATGGAACCTCATATGAGCCCTCATCCAAATCTCACCGGTCGTGCAGATGCTGTAAAAGCATTGGGTAATGGCGGAGACACAAATGATCCAGAAAAGAGGAAAGACATTTTCCGGCCATCCTTTCCTGATGTAGAAGGTGGACGACGCGATCGTTGGCGTGATGAAGAAAGAGATACCGGTTCTGCCATTCGCAGAGATCGGTGGAGAGAGGCAGATAAGGAAATTGGCGATACCCGCAAGATGGAACGGTGGA…	1793	WPKEPMSTLTPISPCPLFPRSPKKCKGLMVPFLFHRSGCCQSPGKISLEWNLI*ALIQISPVVQML*KHWVMAETQMIQKRGKTFSGHPFLM*KVDDAIVGVMKKEIPVLPFAEIGGERQIRKLAIPARWNGGRIVPL*DIPVKHAAFHLSGGMSLATGRVVMINAVRANGTLAGDQMTKSQKERVDAINGWILAETVKDFVIKGHLFYLIMERKWIGRVITILGREDLTLL*AEEGQSPLITKL*LQTNKSPCLALVGGVEKMPLQPFLLVGEEAAPLEILRIKIPLILL*MPFRIRLTTSKEIPLF*DIIGPNCLMYTGQLT*ELM*FR*MV*LKLLL*HRWSHWSPWLFLYLLPRNLLFCKELTKET*LVVVHLRLQKMVPLDGTLQMPPN*GEPN…
	476	UN001366	5361	GACAGGGCCCAACTTGGAAAGGCATATCAGACGGCTGAAGTGCTTTTTGAAGTTCTTTGTGCTGTTAACAAGACGGAAAAAGTGGAAGAAGTCGACCCTGAGATTATTGCAGCAGCTAAAGATGTCCAAGAGAAGAAGGAAATCTATACTCCATACAACATTCTTCCATTGGATGCCGCTGGCGCGTCACAACCTATAATGCAACTCGAGGAGATAAAAGCAGCTGTAGCAGCTCTGTGGAACACTCATGGATTGAACTGGCCTACTTTATTTGAGCAGCACCGGCAGAAAGCAAGAGACTTGGATATTCTAGACTGGTTAAGAGCTATGTTTGGATTTCAGAAAGATAATGTCAGAAACCAGAGGGAGCATTTGATTTTATTGCTTTCAAATGTCCAT…	1787	DRAQLGKAYQTAEVLFEVLCAVNKTEKVEEVDPEIIAAAKDVQEKKEIYTPYNILPLDAAGASQPIMQLEEIKAAVAALWNTHGLNWPTLFEQHRQKARDLDILDWLRAMFGFQKDNVRNQREHLILLLSNVHVRLVPKPEPFNQLDERAVDAVMHKLFKNYKTWCKFLGRKHNLRLPQQHQEVQQRKILYMGLYLLVWGEAANIRFMPECLCYIFHNMAYELHCHLAGNVGAMTGDSIKPSYGGDEEAFLRKVITPLYRVIDKEAKKSRNGKAPHSSWCNYDDLNEYFWSRDCFSLGWPMRDDGDFFKSTHDEKTIFQTKLPSRKRTEKGTGKTNFVETRTFWHIFRSFDRLWTFLILALQVMFIIAWSGKPLSDIFRKDILYSVSSIFITAAFLRFL…
	477	UN001367	2085	CTCTCGAAGGCGGAATTTGCAGCTGCATTAGGCATGAAACCGAACGATATGTTCGTACGCAAGATGTTTAATATTGTTGATAAAGATCAAGATGGGCGCATAAGCTTTCAGGAGTTTCTTGAGACTGTTGTATTGTTCTCGCGCGGCAAGACGGACGATAAGCTGCGAATTATCTTCGATATGTGCGACAATGATCGCAATGGTGTAATCGATAAGGGCGAGTTGAGCGAAATGATGCGCTCGTTAGTGGAGATGGCGCGCACTACCAGCTTGGGTGATGATCAAGTAACCGAACTAATTGATGGCATGTTCCAAGACGTGGGACTTGAGCACAAAAATCACTTGACATACCAGGATTTCAAGTTAATGATGAAAGAATATAAGGGCGATTTTGTAGCA…	695	LSKAEFAAALGMKPNDMFVRKMFNIVDKDQDGRISFQEFLETVVLFSRGKTDDKLRIIFDMCDNDRNGVIDKGELSEMMRSLVEMARTTSLGDDQVTELIDGMFQDVGLEHKNHLTYQDFKLMMKEYKGDFVAIGLDCKGAKQNFLDTSTNVARMTSFNIEPMQEKPRHWMQEKWDSYITFLEENRQNIFYLFLFYVITIVLFVERFIHYSFMAEHTDLRHIMGVGIAITRGSAASLSFCYSLLLLTMSRNLITKLKEFPIQQYIPLDAHIQFHKIAACTALFFSVLHTIGHIVNFYHVSTQSHENLRCLTREVHFASDYKPDISFWLFQTVTGITGVLLFIVMCIIFVFAHPTVRKKAYKFFWNTHQLYVGLYLLSLIHGLARITGPPRFWMFFLGPG…
	478	UN001369	420	GCTTTCTTTGCGATCTGTCTCCTGCATTCGCTGATCGCTACGACGTGCGGTGCGCTGATGATGTTCTATCTCAAGGAGATATCAGCTATCGGGCATGGAAGCGAGACGGCAAGTAAGCTCCTGGGCTCGACGCCGCACGACCAGCTACTGATTCAGACCTCAGACTCTTTCGCTGGGCTGCTGCTCTGTGTGATTGGGTTCCTCCTCTTCATGGTCGCCTTCGTCAGGGATCGTGACTTTCAGATCTTCTTCGCCAAGGGCTGCATCCTCCTCCACTTCTCCATGGCTCTCTGGCGCATCTACTTCGAGCGGCGCCTCGAGGACCTCGCGCGCGATTGGCCTCGCCAGCTCGTCGGGGACTTTGTCCTCAGCCTTTCTTGGGTCTTCTTCCTCGTCTAC…	140	AFFAICLLHSLIATTCGALMMFYLKEISAIGHGSETASKLLGSTPHDQLLIQTSDSFAGLLLCVIGFLLFMVAFVRDRDFQIFFAKGCILLHFSMALWRIYFERRLEDLARDWPRQLVGDFVLSLSWVFFLVYSWREKYD
	479	UN001376	3534	ATGGAAAATGAAGAGGTTGCAGCAAAGCAAGAGACTGGAACAAAGAGGAAGACCCACTTCCAACTTAATTCACTGGAGAACTTCTATTTGGAAGATAAATATCCCTCACAGAAGGCGATGGAGGACTATGCTGTTGCACTGAAATTGACATATAAGCAGGTTCGTGGTTGGTTCATTGAGAGGAGAAGGAAGGAGAAAAAAGAGAAAGATGTATTTTGTTCANAGTGGGAAAATTGGTCCTGGTAATGTCAGGGATTCAGTACTGGGTTGCACCTTAAATAGGGGTTATGGAAACAAAATATATAACCAAGGCTCTTTAGGTCCAAGAGTTAAAACCCAACCAAAACACAACCAAACAAGGTTTCCAGATTTGGACCGTTCAAAGAAGAACTGCAGTAC…	1178	MENEEVAAKQETGTKRKTHFQLNSLENFYLEDKYPSQKAMEDYAVALKLTYKQVRGWFIERRRKEKKEKDVFCSXWENWSW*CQGFSTGLHLK*GLWKQNI*PRLFRSKS*NPTKTQPNKVSRFGPFKEELQYSNCQE*AYEKSLCWN*EQQPEETPFWSSRFVHSRVYFEKSVPQRWPSSWCRV*PSSGWSFPQLFRFCSCFPRQPKKAKKKKDL*IVHLGLPNSDTEGCPSKEIWYWERVDDTVACN*SRFPMLAYWCQFN**RSSKDVCQLYLFGSS*VFTPTTEKITISKNCCETKIAGK*ITE**KAFRKKKKGGM*M*QRRKSKESI*SRMQTCHWRVEITRAIGCYSGIIG**GAGAKGITSRTESIDMLSSCN*WTS*LFTLQRLAG*VSS…
	480	UN001378	3408	CATGAATCTGATGTGTTTGAGAGGAGGAAAGGCTTCGATCGGTATGATCGGGGGACTCCGGTTTCTTCTCCCCGTAATGGCGAGAGGGTGCACCGATCGGAGAGCTTTTCGAGGAGAGAGTTTCCCAAGGGGTTTCGGTCGGAGAGGGAGAGGCCGAGGCGGGAAGAGAGCAGCAGCGTCTTGGCGTGGCGGAGATCGGTTGGAAATGGCAAAGAAACTGATGAAGATTTGAGGTCTGGTTCCGAATCGGGGAGAGGGAAGCGTGTCGGATCTGAGGATAGAGGGAGTGCTAGGTCTTCCCCGGGATCGAGAGAAGTTGGAAAGTCGCCGCAGTGGTCTAAGGATTCAGGTGGGGAGCAATCAAAGAACTCTGAGATGGAGAAAATTGAAGCTGCAGAT…	1136	HESDVFERRKGFDRYDRGTPVSSPRNGERVHRSESFSRREFPKGFRSERERPRREESSSVLAWRRSVGNGKETDEDLRSGSESGRGKRVGSEDRGSARSSPGSREVGKSPQWSKDSGGEQSKNSEMEKIEAADGENGSGSEMEEGELEPDPKPQPELQPKSLEENEHVKCGTRVETDLIKEETSPESENSQTDAKGVCDGVIEPNKCGTGVEMVLVKEEKSLGIENLQTNGQGVCEGIIEGEMLETVTDVVGENDKLLYHMDDALNEGSEKREDAEANGSREKEENIEEECAKLPSPAHEHESLAAKEESNEEENLENPLPLEDKHKQENGMDLEVKEGDTGLLDSNKEVVEESRSPQVTLKFLTDKLHSSKEKGKDLVVSASHEGNYMEGGERMAIDL…
	481	UN001379	4824	TCTTCAAGTATGTTGACCAGAGAGCAAAGGTGGGTTCCTGGTCGAAAAAGTATGACTGTTTTGGGGAAAATTGCCGTCCCAAAACCTGTTAATCTACCCAGTCAAAGGCTAGAAAATCATGGTCTGGATCCAAATGTGGAAATTGTTCCAAAGGGTACACCTGGCTGGGGCAGCCGTTCATCTTCAACAACAACAAATGCTTGGGGTTCCTCTGCATTGTCACCTTCTACTCCCGATGGGGGTGCAGGATCACCCAGTTTCCTTACTGGTCGCCCATCTTCTGGTGGGAGTGGTACTCGGCCATCAACCGCTGGCAGTGATAAATCTTGTGATACCGCCTCTAATGCTTGGGGTCCAAACTCACGGCCCTCATCAGCATGTGGAACATTGACGTCAAGT…	1608	SSSMLTREQRWVPGRKSMTVLGKIAVPKPVNLPSQRLENHGLDPNVEIVPKGTPGWGSRSSSTTTNAWGSSALSPSTPDGGAGSPSFLTGRPSSGGSGTRPSTAGSDKSCDTASNAWGPNSRPSSACGTLTSSQTLVTSTRPRSAETRPSSSHLSRFAESNSDSSSAWSRPGTAEKLGTASAKVDGFTMSSGDFPTLGSGKSSDLHTQQGHSSHGRPLSASGRAAPQSDTLETSQNGDGSADASTDKGNVNTWKRDESPCHGGLAAPSMEKCQSDPQLPQLHPNLHIPPHHIDPWQGLPILNPPEGAWHRGGHPGVPYGPSFPPGSYSHQHLGYYHSQLPSRPTSNLQAGSNPGVGPGSCQPNSGDAYHPHLPDSYIFPNHPVIPVRPAAYTGPPPNGY…
	482	UN001381	4563	GAAACATTAGCCAAATCTTTGGTATTATGTTTTCGACTACATTACACCAAGAATTCAACGATTGTCAATACAGCGGGTGCCACGATTCGACAACTTGTTTCACTGGTGTTTGAACGTGTCTATTTAGAAAAGGATTCGGTGGCCACATTACAGGGCGCCACTCAAAATGCTAACAAAGAATTGGTGGATGGTGACAACAGTGGAGGGGCTAGTACCGAAATTCAAACCTTTGCTGCGGATGCATTTTTCTTGTTTCAAGATCTCGTGCAGCTTGTGAATGCTGATCAACCGTACTGGCTAATTGGAATGACAGAAATGACGCGCACCTTTGGTTTAGAATTACTCGAGGCGGTGTTAACGAATTTCAGCGCTGTATTTCATGAGAATAATGATTTCCGT…	1521	ETLAKSLVLCFRLHYTKNSTIVNTAGATIRQLVSLVFERVYLEKDSVATLQGATQNANKELVDGDNSGGASTEIQTFAADAFFLFQDLVQLVNADQPYWLIGMTEMTRTFGLELLEAVLTNFSAVFHENNDFRLLLKERVCALVIKLFSPNVKHRQVPAPNNGNTAVPNDKPYFPISMRLLRLVAILIQKYHTILVTECEIFLSLIIKFLDPDKPHWQRALALEVIHKLATKPNLIAFFCKSYDLKNHATNIVHDMISALATYVRYSLINAVALQTGQPPATNQNNPTAAHNSGNQCGFMFRGVYLSLVATFPPGVAKAVYLEMLDKLEAPNIPDSYGVSVAYAILLDITRSIGGVIQRTPEMQQPTHNSTLITEEEHKPLCLQLINSSWAGLLLAFVP…
	483	UN001382	4737	GTTTAGATTGCACCGGCACAAGCAGGAGAAATCAAGAGAGAGGATCGATTTCAAGTTCTCAAACTTCCACGCACTTCAGGTGCCCAAGGGATGGGACAGGCTTCTTGTGTCTGTTATCTCCATAGAAACTGGGAAAACAGTAGCCAAATCAAGCAAAGCAGTTGTACGGAATGGCAATTGTCAATGGACGGAAGCTCTATCAGAATCTATATGGGTTTCACAGGAGGATGCTTCAAAAGAGCTGGAAGAATGTCTTTTTAAGTTTGTAGTTTCCACGGGATCAGCTAGATCTGGTATTCTTGGAGAGGCTGTTGTCAATTTGACAGACTACACCAGTTCAACAGCTTCAGTTCCTGTTTCATTACCTTTGAAAAAATGCAGTCATGGGACAATTTTGCA…	1579	V*IAPAQAGEIKREDRFQVLKLPRTSGAQGMGQASCVCYLHRNWENSSQIKQSSCTEWQLSMDGSSIRIYMGFTGGCFKRAGRMSF*VCSFHGIS*IWYSWRGCCQFDRLHQFNSFSSCFITFEKMQSWDNFASQNSMPFSESEAKGGKAFAKCKFQSGGST*GV**HGHQIRWI*CVHWKHWIFF**QFRW*PWYFSSWRNWE*GYEFFSFWITP*F*FRGWIHGQDLLSWKQCKWGYLQSHRKTRFSWLPKSCN*CWSC*RSS*IKPIILQFKDHRIKHSSSESVARGYWTRSFTCACSIIIKDHWFA*RFS*SC*RYY*RASWRS*DVGKKCPEIKA*S*TLKKGFF*AIKPSSRSGYGTFCSMH*TRQI*TRD*TTEIIVG*VNGETVSH*EFNC…
	484	UN001387	2250	ATGTTTAGAGTTTTAGGACATGGGCTGTTGATTTCCTCCCTGTTCTTCACCGTTTCGGCCATTGACACCGGATTCTCCAACTGTAATTGCGACGACGACGGCCTCTGGGCCATTGAAAGCATTCTAAAATGCCAGAAAGTGAGCGATTTGTTGATTGCACTAGCCTACTTCTCGATCCCAATCGAGCTTGGGTATTTTGTGAGCTGCTCCAACCTCCCATTCAAATGGGTTCTCATTCAGTTCATAGCTTTCATTGTCCTCTGTGGGCTAACACATCTACTTACTGCTTGGGTCTACGAACCTCACTCCTTCCAAATGATGCTTGCCCTAACAGTATTCAAATTCCTCACCGCGCTCGTCTCCTGTGCGACCTCAATAACCCTTGTGACCATGATCCCA…	750	MFRVLGHGLLISSLFFTVSAIDTGFSNCNCDDDGLWAIESILKCQKVSDLLIALAYFSIPIELGYFVSCSNLPFKWVLIQFIAFIVLCGLTHLLTAWVYEPHSFQMMLALTVFKFLTALVSCATSITLVTMIPLLLRVKVRELFLKNKTRELDREVGMMKKQEEASWHVRMLTREIRKSLDRHTILYTTLVELSKTLLLQNCAVWMPNEERTVMILTHELKQRNSSDLPIPINDSDVQEIKGSKGVKILQPDSPLGLASSGGDGEPGGVAAIRMPMLRESNFKGGTPELIQACYAILVLVLPNVDSRSWSYQELEIVEVVADQVAVAISHAAVLEESQLMREKLAEQNRVFQQAKRDAMMASQARNSFQKVMSHAMRRPMHSVSGLLSVMQLENLGPDQ…
	485	UN001389	468	GTGGACATACTCAAGTATCAAGTGCGTTCCAAACCAGGCGCCTCGTCATGTCCCTTCCAGCTGGTATCGTATTGGAAGTGTGAGTCCACATTTACGGCACTCAAAATCGATTACAAGTACAATAATCACGCAATGGCAAGCGCCTCACCGTTGCTGAATGTCACGCTGTCGGTGCCGGTGAACGGTTCGGTGCGCAACGTGCAGTCGAAACCACATTCCGCTTGGCTCGGTGAGTCGAATCGCTTGGTTTGGAATTTCACTGACATCTCACAAAATTCCCAAGATGGAGGCGTCGGTACGTTACGTGCGCGTCTCGAACTGAACGAAGGTCCATCCATACCGGCCCTATTGACTACACAATTCAATTGTGAGGGCACTACACTATCGGGCATTGAGTTT…	156	VDILKYQVRSKPGASSCPFQLVSYWKCESTFTALKIDYKYNNHAMASASPLLNVTLSVPVNGSVRNVQSKPHSAWLGESNRLVWNFTDISQNSQDGGVGTLRARLELNEGPSIPALLTTQFNCEGTTLSGIEFELQGSGYRLSLVKRRFVSGKYVC
	486	UN001395	4833	GCGGAGAATCGTCGCCCGAAGAACGTGCAGGTCTCGCTCCGTGCCAAGTGGTCTGGAACTCCGCTCTTGTTGGAAGCTGGTGAGCTTCTATCGAGGGAATGGAAAGATCTATTTTGGGAGTTTATTGAGGCTTGGTTGCATTCAGAAAATGGTGCTGACGCTTTGACAGCCAAAGGCTGCCTTCAGAAGATTGTCAAATATGCGCACTCCCTTTTGAGTGAACCATTGGCATCAATGTTTGAAGTTTCTCTTACTCTTCGATCAGCATCTCCAAGATTGGTGCTCTATCGGCAGTTGGCACAAGATTCTTTATCTTCTTTCCCACTAGCCAATGAAGCTAACTCCACTGAGGGAATTTCGGAAGCTGGATTTGGTGCAGAAAGCAAAAAAATGGATCAC…	1611	AENRRPKNVQVSLRAKWSGTPLLLEAGELLSREWKDLFWEFIEAWLHSENGADALTAKGCLQKIVKYAHSLLSEPLASMFEVSLTLRSASPRLVLYRQLAQDSLSSFPLANEANSTEGISEAGFGAESKKMDHLLVNMNPKSPGGKCCWVDIGGTLLFDVSDLRLWLDTMNEQVRDSFELPELFAFDHIYYKSSAGSPVVILYGALGTDCFRDFHFVLVEASKKGRVNYVVRPVLPSGCETSTDHCGAVGASDALNLGGYGVELALKNMEYKAMDDSTVKKGVTLEDPRTEDLSQEVRGFIFSKILERKPELTNEIMAFRDHLLSSTTSDTLDVWELKDLGHQTAQRIVHASDPLQSMQEINQNFPTVVSTLSRMKLNASIKDEIIANQRMVPPGKSLL…
	487	UN001397	600	CCACATAATACTCAGCAATATTATAGAGCAGTACAACGCGAGCATCGCATGTTGAAGTCTTCGCTGCCACCTGGCGTCTGGGTTAAAATTTTTGAAGATCGCATTGATTTGCTCAGCGTCATGATTGAGGGTCCAAAAAAGACGCCATACGAAGATGGTTTGTTTTTCTTCGATATTCAGCTTGGCCCCGACTATCCAAAGAGTCCGCCATTGTGCCACTACATAAGTTATTGCTCAGATCGCTTAAATCCAAACCTATACGAAGACGGTAAAGTATGTGTGTCTTTGCTGGGCACTTGGGCGGGGCGCGATTCAGAAGTTTGGGGTCCAAATAGCACTCTACTCCAGGTGATTGTTTCTATACAAGGTCTGATACTGGTACCTGAACCATACTTTAAT…	200	PHNTQQYYRAVQREHRMLKSSLPPGVWVKIFEDRIDLLSVMIEGPKKTPYEDGLFFFDIQLGPDYPKSPPLCHYISYCSDRLNPNLYEDGKVCVSLLGTWAGRDSEVWGPNSTLLQVIVSIQGLILVPEPYFNEAGYDKQKGSQQGSENSRMYNEMVIIKMVQSSTKLLQQPPELFRREIYEHWKQRGFLMYERIKGWME
	488	UN001400	1785	AGTGCATATTTTCATCAGCAGAAGGGCTTACCAGCTCAGGAACAATTATCTCGCCGCCTAGCATATGGGCCAAATGAAATAACTATTCCTTACAAAGACTTCAAGACTCTCTTGGTTTTGGAAATGTTGAATCCATTCTACGTTTTCCAAATATTTTCTGTAATATTGTGGTTTACGTATGACTACTATTATTATGCCTGTGTAATACTGCTCATGTCAATGTTTGGAATAGCTATGTCGATTATTCAAACTAAAAAGAATCAAGATTCTTTGCGTGAAACTGTAATGAATACCGGTTGTGCTTTGGTTGTAACAGAGTCTGGTCAAGTTCGGGAAATACCTACCGAGTGCTTAGTTCCTGGCGACATTATTGAGATACCCACAAGCGGATGTACGATG…	595	SAYFHQQKGLPAQEQLSRRLAYGPNEITIPYKDFKTLLVLEMLNPFYVFQIFSVILWFTYDYYYYACVILLMSMFGIAMSIIQTKKNQDSLRETVMNTGCALVVTESGQVREIPTECLVPGDIIEIPTSGCTMQCDAVLLSGNCILDESMLTGESVPVTKTPLPMKVDLIFDKKEHARHTLFCGTKVIQTRYIGSEKVLAIVINTGNITTKGGLIRSILYPPPVDYKFEQDSYKFIEFLGLIAIIGFVYTLITKIMRGIEPVKIAVESLDLITIVVPPALPAAMTVGRFYAQKRLQKKNIYCISPRSINVAGSIDCCCFDKTGTLTEEGLDMWGVVPKTVTNEFQMPIKQIKRLPYDNFLFGMATCHSITIMNGKLMGDPLDLKMFESTGWTIEDQKNI…
	489	UN001403	3015	AAAAGGAACAGGTCTAATGCTCTGAAATTCTTCGATGATGAAGCCGCAGATGCAGGAATCAGCGAAGGAGACGAAGATGATAGCGAAAACGAGCTCGACCAAGATTTCATTGATGATGAGCTGGAGACAGAAGGTGCGAATAAAATTGGAAGGCTGCATCATCTCCCATTTTTGCTGAAAGAGGAAGAGTTGAGTGATGATGAATTGGAAAAATTACTTAAAGAGAGATATGGTCGTGGTTCAAATAATGTTGTATATGCTGATGAAAATCAAGATTCCAAAGATTACAACGATAGAGTGCATTCCATGAACTCTGCTAAAGATCCAACTATTTGGAGGGTCAAATGCATGGTTGGACGTGAGCGGCAAATAGCTTTTTGCCTTATGCAGAAGTTTGTT…	1005	KRNRSNALKFFDDEAADAGISEGDEDDSENELDQDFIDDELETEGANKIGRLHHLPFLLKEEELSDDELEKLLKERYGRGSNNVVYADENQDSKDYNDRVHSMNSAKDPTIWRVKCMVGRERQIAFCLMQKFVDLQSFGTKLHMISAFALDHMKGHIYIEADRECDVTEACKGLCSVYSSRLVLVPKNEVPHLLAPRNKLNDVSKGSWVRIKCGKYKGDLAQVVAVDDAQKKATIKMIPRIDLQAISLKLGGGGETVDEAAVPAPRLISSHELEDFRPHIQYKRDHQTGEVFEIFDGLMLKNGYLYKKVSIASLSCWEIKPSAAEIQKFMCADGTSEDSEWLSVLYGGQRKSHSGMVDNVMSGASESTSETKEGDNYELNDLVLFGRKEFGVIVGVGKD…
	490	UN001406	1842	TGCATATTTCCATCAAGCTTCAGTTGGTAGTTACATGCATTATCAATACCTTTCCAGTATGAAGGGAAACAATGAATCTGGCAACTCTAAGGCTTCTAAGGGAGCATTTGGTACTGGTTCTGGAGACATTGTTTTGGGAGCATTCAGACCCCTCAGATTTGTGCCTGAAAAACTTGAGGATCTTGAAGGCTTCGTAACTAATTTTTTCGATGGCCTCCCTAGTGTAAGAATTGTCTGCATAAGTTTGCTTGGAGGCAGCTGCAGTAGCCTCATTGGAGGAATGCTTCTTGCACCTTCATCTTGTCCTGCATGGATGCTGCTATCACGCTTCCATTCAATGGAGCAACCTGTTATTATGCTCTTACCTGTGGATTTGGTTGTTGAAGGTGCATACCTCCT…	614	CIFPSSFSW*LHALSIPFQYEGKQ*IWQL*GF*GSIWYWFWRHCFGSIQTPQICA*KT*GS*RLRN*FFRWPP*CKNCLHKFAWRQLQ*PHWRNASCTFILSCMDAAITLPFNGATCYYALTCGFGC*RCIPPGVQEKFPTLPFSTYH*L*HVLIDLSTFHQKIFLMMQIMEXESISXXLIRVKSGYVHGATLW*MM*LHNSGQYWRRTACQPRCLP*LIHKKAGSSGGLGEPNLIIASISS*EVWKVHGWVLGDVC*WGTT*TVNAWTWWSRS*RVI*KVDSNSKCTKVFSKQLSAVPNL*PNQKFVFLSYFHTKATLAEVGVVGRIYLGPSASCDATGSIYGLPYQLILEAVGDIVEESTDREPVVLVLDANVQMLPWENLPILRKQEVYRMPSVIS…
	491	UN001408	1362	TATCCAAAATCACCTTTTCAACGTAACACACTTGTTGAGTCCCAAATTCTTAAACGGAATCCCACGCAGATAGCAGAGTTGATGAGTTGGTTATGCCGGCCGCCAACTATTACGACATATCGCATAAATGTGCTACGCACGACGGTTCCAGCGTTCAAGCAGAGACTACAACAAGTGCTACGTGACCGATATGCGCAGCCACCTAAAGTTTATGAAATTGCCAGCATTCCAGAGGTTCTTAGCATATCGCCCATACCAGTCAGTATTCCGGATATGACGCAAAAGCAATCAGAATTACAAAGAGAAGTTGTGGTAGATAGCTGTTGTGGTGCAGCTCTACTACGTGGCGCTCATCTATATGCGCCTGGTGTACTTGCCATGGAAGCGGGCACCAAATTG…	454	YPKSPFQRNTLVESQILKRNPTQIAELMSWLCRPPTITTYRINVLRTTVPAFKQRLQQVLRDRYAQPPKVYEIASIPEVLSISPIPVSIPDMTQKQSELQREVVVDSCCGAALLRGAHLYAPGVLAMEAGTKLGEQVSVYADLAGKCKQGTNTRYDSPDKLFLGVGVVRMQRHQIFGPSTKFGDSNDSAPTERLKGVAVEMIETTSGVPTIGDLSCSDALLQNLPSIVCVRVLKPQPGERVLDMCAAPGNKTTHIAEMMDDHGEIIALDKVANKIAVMQEKIRGEGLKSIRAYAFDATKAFDTSIPAKNTKILQSPPFAANTFDKILLDAPCSALGNRPFLIASSNMTPQMLASYPKVQRRLFSAAVPLLKPNGVLVYSTCTVTEEENECIVSWVLETF…
	492	UN001409	567	ATGCATGGGAGCAGAGGTTGTTTTGGATGCTGTACTAAGCCCGCTCCTATTATTGCTGTGGATGAACCGTCAAAGGGTCTAAAAAATCAAGGCCAGTCTGTGAAAAAACCCAGTTTATCAGACGATTTCTGGAGCACAACCACATATGAGATGGAAAAGAGCACAGTTGATTCTCAGAGGAGCATCTCATCTATTAGTGCATCAAACCAAACATCTGACCACCACAATGGAGGAAGTACCAGCAGCCCATCCGAATTTGTGAATCATGGTTTTCTTCTTTGGACTCAAACTAGGCAGCAATGGACCGTAAATAAAAATTCAAAGAGCCCTGCAAAGCAACTCCAAGAACCCAGGTTAAGTTGGAATGCTACTTATGACAGTTTACTAGGGACCAACAGA…	189	MHGSRGCFGCCTKPAPIIAVDEPSKGLKNQGQSVKKPSLSDDFWSTTTYEMEKSTVDSQRSISSISASNQTSDHHNGGSTSSPSEFVNHGFLLWTQTRQQWTVNKNSKSPAKQLQEPRLSWNATYDSLLGTNRLFPQPIPLSVRLLSTAVSLAAGVIP*IHCSSLWKRLCLQEMVDFLVDTWEQEGMYD
	493	UN001410	4317	ATGGGGCGCCTTAAATTGCAGTCGGAGATTAGTTCGATTGAAGAAGAGCCAGGAGATTGTGAGGTTATGTCTAACAAAGGTGCTTTTGCATGTATGGTGAATTCAGAGGTAGGTGCAGTGCTGGCTGTTATGAGGAGAAATGTAAGATGGGGAGGGGGAGGTCGTTATATGGCTGGTGATGATCAATTAGAGCATTCTCTCATCCAGTCCTTGAAGACATTGCGAAAGCAAATTTTTCTATGGGAACATCAATGGAATACGATTGACCCGGCTGTCTATCTGATGCCCTTTTTGGATGTGATTCGGTCGGATGAAACTGGTGCGCCCATCACAGGGGTCGCTTTATCATCTGTTTACAAGATACTAACTGTAGGGATGCTTGATCTGAATACTGTGAAT…	1439	MGRLKLQSEISSIEEEPGDCEVMSNKGAFACMVNSEVGAVLAVMRRNVRWGGGGRYMAGDDQLEHSLIQSLKTLRKQIFLWEHQWNTIDPAVYLMPFLDVIRSDETGAPITGVALSSVYKILTVGMLDLNTVNVESALHSVVDAVTSCRFEVTDPASEEVVLMKILQVLLACMKSKASIVLSNQHVCNIVNTCFRVVHQAGTKGELLQRIARHTMHELVRCIFSHLPDIDHTKQAITDGGDPSIRTEMGGLDKDYAFGVKQSDNGNGSIEYDAPPSSVGFASNASNFSGSMEGLVDENAVGYVSNKEATNDMHLTLEPYGVPCMVEIFRFLCSMLNVVEQTGMASRSNPIVFDEDVPLFALGLINSSIELAGPSIHQHPKLLSLIQDELFCNLMHFGLS…
	494	UN001411	876	TTGGTCAATGATTGCAATGAAACTGAGGGTACATCTCCTTGTCCTCACTTGTCTAGTGGGGAGCACTCGCCCACTGAAGAAGCAGGACATGATGCAAATGCAATTGCCTGGAAGATAGAAAGTGGATGCATGCAATATGGATGTTCACATTATCGACGAAAATGCCGCATTAGAGCTCCGTGCTGCAATGAGGTTTTTGATTGCCGGCATTGTCATAATGAGGCAAAGAACTCTATTAAAACTGGAAGGATGCACAGACATGATCTTCCGCGCCATCAAGTGCAGCAAGTGATATGTTCACTTTGTGATACTGAACAGGAAGTTCGGCAATTTTGTATCAACTGTGGCATTTGCATGGGGAAATACTTTTGTGAGACCTGCAAGTTCTTTGATGATGAT…	292	LVNDCNETEGTSPCPHLSSGEHSPTEEAGHDANAIAWKIESGCMQYGCSHYRRKCRIRAPCCNEVFDCRHCHNEAKNSIKTGRMHRHDLPRHQVQQVICSLCDTEQEVRQFCINCGICMGKYFCETCKFFDDDVSKKQYHCYGCGICRIGGRENFFHCYKCGCCYPILLRQSHPCVEGAMHHDCPVCFEYLFESTDEVNVLPCGHTIHMNCLKEMQQHLQYACPLCSKSVCDMSKVWEKFDIEIAATPMPESYQKKMVWILCNDCGVTSQVKFHVVAQKCLDCKSYNTRQTR
	495	UN001412	768	AAGAATATGGGGTTGGATTATATTGACACCTTCAGTCTTGTTGTCAAACCTACCACTATTCACGTTGTTTTTGCACTAGCAGTCCACTATAATTGGTGTTTACATTAGTTAGATGTCACCAATGCGTTCTTGCATGGTCTACTCAATGAGGAGATTTATATGTGTCAACCTCAGGGCTTTGTTGATCCATGCTTCCCTAATCACATTTGCAAGCTTCATAAGTCCCTCTATGGCCTCAAGCAAGTGCCCCGCGCCTGGTATGATCGTTTTTCCAACTATTTAGAGGGATTGGGCTTAACCAAGACCATTGACTCTTCTCTGTTTGTCCGATCATACAAAGGCACAATTACAATCATCCTATTATATGTTGATGACCTAATCATTACCGGCAATAACAGG…	256	KNMGLDYIDTFSLVVKPTTIHVVFALAVHYNWCLH*LDVTNAFLHGLLNEEIYMCQPQGFVDPCFPNHICKLHKSLYGLKQVPRAWYDRFSNYLEGLGLTKTIDSSLFVRSYKGTITIILLYVDDLIITGNNRLYVDFFFISQLNLVFEMKNLGCLHHFLGIEVNRSSSVLFLSQTKYARDL*QKDSTLDLKPIGSPSLYKPSSSPSSTTMPDPYVYRSLAGSLQYLTFTRPDLGFAINQLCQHMHQPSTANFTCS
	496	UN001414	1815	ACGCGCAAATTTTTCAGCAACAAAACGAAGGCTATCGTCTGGGGTATGCAACAACGGGCTGTACAATCAATGCTAGATTTTGATTTCATTTGCAGACGTGATGAACCGTCCGTTGTCGCAATGGTATACCCCTTCACCGGTGATCATAAGCAAAAGTACTACTGGGGTCACAAAGAGATTCTAATTCCAGTTTATAAGAAAATGTCGGACGCTGTTAAAAATCACAAGGAAGTCGATGTGATGGTGAATTTCGCCTCATTGCGCTCAGCTTACGAATCGACGTTGGAGGTATTGGAATTCCCCCAAATACGCACAGTTGCTATCATTGCTGAAGGTATACCCGAAAATATGACACGCAAACTAATTTTTGAAGCCGACAAGAAGGGAGTTTCGATCATC…	605	TRKFFSNKTKAIVWGMQQRAVQSMLDFDFICRRDEPSVVAMVYPFTGDHKQKYYWGHKEILIPVYKKMSDAVKNHKEVDVMVNFASLRSAYESTLEVLEFPQIRTVAIIAEGIPENMTRKLIFEADKKGVSIIGPATVGGVKPGCFKIGNTGGMLDNILHSKLYRPGSVAYVSRSGGMSNELNNIISKATDGVLEGIAIGGDRYPGSTFMDHILRYQADPEVKLIVLLGEVGGTEEYEVCAALKDGRITKPLVAWCIGTCASMFTSEVQFGHAGSCANSDRETACAKNNALAEAKAFVPASFDSLGDLIQEVYAQLVKSGRIVPKEEVPPPTVPMDYSWARELGLIRKPASFMTSICDERGQELLYAGMPISEVLNKDVGIGGVVSLLWFQRCLPPYVC…
	497	UN001415	897	ATAACAAAGGTGAATTATTTGATGTTTGAAAGCGGCGAGTTGGGTGCCAATCTGACGCGTCACCATCTCAGCGATCTGGGAAATTTGGCGCATCTACGCTTTAGTTCGAATAGTTTAACCCATATGCCGGCGGATTTGTTCGCCGATTTGGGTAATTTGAATTGGTTGGATTTGCGTTCGAATAATGTGAATTTGACGGAGAAACTCTTTGAGCCGTTGAAAAGTTTGACATTCCTCGAACTTGGACACAATAATTTGAAAACTTTGCCGCGTGGCATTTTTAAGAATCAACAAAAACTGCTGCACCTTAATTTGTGGGGCAATCAATTGCGTAATCTGACAAAGGATGTATTCGAGGATGCTACCGCACTCACCGACATCGACTTGAGTGCCAATAAT…	299	ITKVNYLMFESGELGANLTRHHLSDLGNLAHLRFSSNSLTHMPADLFADLGNLNWLDLRSNNVNLTEKLFEPLKSLTFLELGHNNLKTLPRGIFKNQQKLLHLNLWGNQLRNLTKDVFEDATALTDIDLSANNIETFAPDVFQPLTNLSSIYINANHIRELPYGLFANNKNLTEFRLINNRVALITLPSGLFANLPHLKDVRLTCELETVPEDLFANSTKLANLTMKENMLTTLPEKLLIDQHELYDLDLTHNLLKTLPDGLFQSTRNLVELRLSYNQLSEISSELFNPLVNIEILHID
	498	UN001420	3057	GATGAATTAGATATTGATTGTATGGAGCTTTTGGGTTCTATGGATGTTGAAATTCTGGAGTGCTTGTTTGATGATGTTCCATCCAGGCAAATTCCTAAACCTCCACCTACTTGCATTATCTCACTCCTAGACATGGATTATGTAAGCGTGACAGAGAACATACATCTGAGTAGACACTCAGTTATCTACACAAAGACATCATGTGGTGATTTTTTTTCACTTGCAATTAAACTTCAATTTCAAGAGGTTGAGATGCTTGATTTGGTACATTTTCATTCTTTCGAAGTGCTTGTCAGCTTGCTACTGGCCTATCTACCGGAAACATGGGAGCAGATGATAAAAGAAAATACAAAAGCTGTTGGAAGCTTTTATGAATTCATTATTAATACTGAGTTGGCT…	1019	DELDIDCMELLGSMDVEILECLFDDVPSRQIPKPPPTCIISLLDMDYVSVTENIHLSRHSVIYTKTSCGDFFSLAIKLQFQEVEMLDLVHFHSFEVLVSLLLAYLPETWEQMIKENTKAVGSFYEFIINTELALVDDTFKSFSVPFLCEDKEIVFFSSVVRDILDEQKVRHATACDGIYLDWHILQEEICDREVFLTYKKVLEGIDVQKIATELQPSDAGAVIDSVFLDDTQTELNIFRCEEMLSEIPSIAMDNELTRSNTNQLLKDENQTLESGEPTDENQMPGSGEPTVVNPERISLLLESMSQFNELKFFLKARKGVTGRTSEDASKEKTDSRAPVSVISPKDLTILSSSQEVTFQQWEIEVHHIKLSDYILDLIDNIYKNYSDIWQNGIEMEKEN…
	499	UN001425	1923	ATGAATGGTCTTCGGTGGTTGGTTTCATTATACAATAACCACCTGAATGGGATTCTAGCAGATGAAATGGGCCTTGGTAAAACTGTTCAGGTTATTTCTCTTATATGCTATTTGATGGAAATGAAAAATTCCAGGGGACCATTTCTAGTGGTAGTTCCATCCTCTGTTCTGCCGGGATGGGAGTCTGAAATTAGCTTCTGGGCTCCCAGCATAAATAGCATTACATACGCTGGCCCCCCAGAAGCAAGGCGTAGGCTATTCAGAGAAAGAATTGCTCCACAGAAGTTCAATGTCCTTCTGACAACATATGAATACTTAATGAACAAAAATGATAGGCCAAAACTGAGCAAGATTCACTGGCATTACATTGTTATTGATGAAGGTCATCGCATAAAGAAT…	641	MNGLRWLVSLYNNHLNGILADEMGLGKTVQVISLICYLMEMKNSRGPFLVVVPSSVLPGWESEISFWAPSINSITYAGPPEARRRLFRERIAPQKFNVLLTTYEYLMNKNDRPKLSKIHWHYIVIDEGHRIKNASCKLNADLKHFQSSHRLLLTGTPLQNNLEELWALLNFLLPNIFNSSEDFSQWFNKPFESSGDNSPDEALLSEEENLLIINRLHQVLRPFVLRRLKHKVANELPEKIERLVRCEASAYQKLLMKRVEDNLGSLGFSKGRTVHNSVMELRNICNHPYISQLHADEVNNLIPKHYLPPIVRLCGKLEMLDRLLPKLKATDHRVLLFSTMTRLLDIMEEYLNWKGYKYLRLDGHTSGNERGALIEEFNRPESQAFIFLLSLRAGGVGVN…
	500	UN001427	345	TGCCTGGAGTGCAATAAGGATTTCAGCAAACCTTGCTACGTAACTCAACACATCAAGAGCTTCCACTTTGGTGAGTACCCATACCGCTGCGCCAAATGCGGCAAACGCTACCAAACTTTGGAAACCTATGAAATTCACGTCTCGCGACATGGGGCAATCGGAGCCTTTAAGTGTAATCATTGTGCAAAACAATTTTATCATAGGTCAGATTTGAGGCGACATGTCACCAACAAACATACAAACGCAAGGCTGCATGTCTGCCCGATATGCGATAAGAGTTTCAGTCGCAATGATCATTTGGGCAAACATATTGAAATTCATAATAAACCTAAGAGAGTACCCGCA	115	CLECNKDFSKPCYVTQHIKSFHFGEYPYRCAKCGKRYQTLETYEIHVSRHGAIGAFKCNHCAKQFYHRSDLRRHVTNKHTNARLHVCPICDKSFSRNDHLGKHIEIHNKPKRVPA
	501	UN001435	1233	GCCCGCCCCTTCCTCCGCGGCGAGCTCGAATCCGTCGACCCAAACCTCCCCTCCCTCGTCGCCGTCCTCCGGTCAGTCGGCGCCGGCGAGTGCTGGCACAAGCACGGAAGCTTCCTCGACCACCTCATCGACATCTACCGCATCCTCAAGCTCTGGAAGGCCCCCGACGCCGTCGCTCTCTGCGGCCTCTTTCACTCCGCCTACTCCAATTCCTATGTCAATCTCGCCATCTTTGACCCCTCCACCAGCCGCGACACCGTCCGTAGCCACGTGGGGGCCGCCGCCGAGCGCCTTATCCACCTCTTCTGCATCGTTCCCCGCCAACCCATCATCCATGATGCCCTCCTCTTCCACTACACCGACCGAGAACTCGGCGAACACCTTCAAAGCTCGGAGCTT…	411	ARPFLRGELESVDPNLPSLVAVLRSVGAGECWHKHGSFLDHLIDIYRILKLWKAPDAVALCGLFHSAYSNSYVNLAIFDPSTSRDTVRSHVGAAAERLIHLFCIVPRQPIIHDALLFHYTDRELGEHLQSSELSIKDAKERGVFSSEEGWRKKLNSILPAEGILVKHIKTGEPVSVSRRVIAVFLFMTMADFSDQLFGFQDHLFDNENGRLEFSGNNSGSALWPGDGKPGLWLNSISRMGALYLLIVREEEIFMEERKRAGGSISNGSVGVDESRDEGIELVIPPVFESCTKVLDAEEQIAATDLYWEAVCDGGKGGLDRVQDLLVRCVERNPFVGEPHVVLGQVYLSKGRFEEAEREAEKGLELMLNWGSPWDKRTSWEGWIAWCRVLLMKAKERSWP…
	502	UN001442	549	GTGGAGCGTCGTTCGAGTATTTTTGAAGAATTCAGAGATGTGCCGCAAATTATTGCCCGCGCTGATGAAGTACCACCAGGCTGTGAAGATAAGAATCGATATGCCAATGTAATACCGCTTCCCGAGACGCGTGTGGTACTGCAGCAGCTTGGAGATGATGATAAAACGGAATACATAAATGCCAATTATGTCAGGGGCCCTAAGGACTCGCCGAATTACTACATCGCCACTCAGGCGCCACTCGAGACAACAGTCACCGACTTCTGGCGCATGATTTGGGAACAACAATCTCGCGTGATCATACAAGCAACCGATCTCTATGAGAACGGCATTGAAAAGTGCGCTGAATATCTGCCACCATCGGTAACTTTGGACAACCACACGACCTTCGGTGACTTC…	183	VERRSSIFEEFRDVPQIIARADEVPPGCEDKNRYANVIPLPETRVVLQQLGDDDKTEYINANYVRGPKDSPNYYIATQAPLETTVTDFWRMIWEQQSRVIIQATDLYENGIEKCAEYLPPSVTLDNHTTFGDFQITLKHREVKDKYAISTLMLKNTAENMSRELTHYWYKWPETGVPNEEAPI
	503	UN001444	4008	CCTCTCCACCAGCACAAGCTCTGCGGCTTCTTCCGCATCGTCCTCTCCCCAAAACCCCCACAGCCCAAAACCCTATCTCCAGGCGCTCGCTGCTCGCTCTTCTCCGACGGATCCGAGATCTGTTTCCGCACCGAAGACGGCATCCTCCTCTCGCCGCCGGGAACCAATGCCACCTCCGGAGTCGATCGAGAAGAACCCTCCGGCCACGAGGCTGTGGTTTCGACGCCTGATTCGGGGCAGATCAAGGCGTTTTCGAGNAGAATGTGGCGGCGGAGGTTCTTCTGTGCCGTCGTCGCGGAGGANNNGGAAGAGGAGGATTGGGACTGTCTATCAGTGCGAGAGTGCGGTTCATCAGCTGCATTCGCTGAGGGGGCACAGGTGTTTGGAGTTTGTGGCGAG…	1336	PLHQHKLCGFFRIVLSPKPPQPKTLSPGARCSLFSDGSEICFRTEDGILLSPPGTNATSGVDREEPSGHEAVVSTPDSGQIKAFSXRMWRRRFFCAVVAEXXEEEDWDCLSVRECGSSAAFAEGAQVFGVCGERG*GFGTGWRDEGGGSRRCVSSACGVVGLAIP*VSNNGSFAVSAFELQLGGEKFIAFF*C***IYSWR**YDLEQFGLSHSWLQNALQYICFS*KKFI*AS*NF*KFTCYWQGGKNIFYQNKSCKCSCWFWYMGCLR*CFN*CLNCSWPPRPCKSCRHLSPSEVLGRSHHAMRET*ALSTSAGSSRVDVTAGTQCRGPGTSLVYGFFN*RWIPLLYKFHLW*NIHWDSPHHYGFPWRNVL**ARFRKDHNSSLPYSEDTWNIGGPT…
	504	UN001445	2895	GATGATGGGAAGACTTTGTTCGATCCCCAATGCATTTTGGTTTTGCTCACCAGTATGCACATCAAAAGGGGGACTGCATGTAAGCAAAACCAGCTTTCTCGGATCATGTTCTATGGGAGTTCGGACATGTCCCTGGGACAATTCTTGCATGGCATCTTACTCAATCAGAAGCACCAATGCTCTACATGTGGTGAACCACCGGAAGCTCACAATTTCTCTTACATTCACAAGAAAGGGAAGCTTTCTGTAGTAGTCAAGCGTCTTTCTCCTGAGTTGCTTTTATCCAGTGAAGCAAAAGGAAAGCTTTGGATGTGGAGGCTGTGTTTAAAGTGTGAGCGGGAGAATGGAATCCCAAAACCCACACGGAGAGTGACGATGTCTAGTTTAGCACATTGTCTA…	965	DDGKTLFDPQCILVLLTSMHIKRGTACKQNQLSRIMFYGSSDMSLGQFLHGILLNQKHQCSTCGEPPEAHNFSYIHKKGKLSVVVKRLSPELLLSSEAKGKLWMWRLCLKCERENGIPKPTRRVTMSSLAHCLSFGKFLDLSISNSTASSRLASCGHLLHRDCLQFYGLGSMVAMVGFSTVDIYTACMPSPILEFNNPNGREWLQNEAKKVLWKGNLLFEEVTSSLQKIVSTFSYSLANQLANELNETEKMLRQEKSDFEKAISKNGNWGQTAHHILNLNRLNHELLLELYVWDRRLQLLHLPSSVSNANYSAVHKEKLYMQRDDINGQTIHERSMAEHGKTIAEDHSHLLTGKDEASLSPGDHQAHNLINGEPSMNITVAETSMLNPQVSQSLLKDTV…
	505	UN001451	4539	TCAAAATTCCAATTTCTTCAACAATGGCAAATGGTGTCAAAGCTAAACTCGCCCTGCATATGCGAGGAACTTGTCATACTTGTCCAACTCATATTCCTTGGCAGCTGGTTACTTCAGTTTCTACAAAACAAAGTGCACACATCATGTGCAAAGAGATCAATAATAGTAGAGAAAGAATCATTACAGAAATCCACACCTGAGATACCTTCGGTGTTTGGTTTAAGTTCTGGTTTCTCATATAAGGCCAGTATAGGCTGTTCTTCATTGTTATTGACAACCCACTTACTGATACTTCTATGGCTGCTGTTGAAAGGCAGCAGAGGCCTTTGCAAATCCAAGCAGTTGGTCTTTTTGGCAGAAATAGCACAATGTATGTCATGGTCTGTGGCATTGCTTGTA…	1513	SKFQFLQQWQMVSKLNSPCICEELVILVQLIFLGSWLLQFLQNKVHTSCAKRSIIVEKESLQKSTPEIPSVFGLSSGFSYKASIGCSSLLLTTHLLILLWLLLKGSRGLCKSKQLVFLAEIAQCMSWSVALLVVLGFKKAKLVKPPWILRVWWICSFFHSVVCTSIVLHSILTYNRYPEIGEYANFLSLLTCAYLSGVSIRGKTGITVSSSSLTDPLLHSPNEKNEEGTRQSIYGKATLLQLITFSWLNPLFAVGIKKPLEQDEVPNIDIKDSAEFLTHSFDSDLNRVKEKDGLHNSFIYKTIFLFIRKKAAINAMFAIISASASYVGPYLIDDFVKFLSKKNQRKLESGYMLAVAFLSAKMVETVAQRQWIFGARQLGLRLRAALISHIYQKGLHLSS…
	506	UN001453	453	GTCGCTGGTTTGCGTCGCAACATCAAAAACCTCGCGCACAACTATTCTGATGCGCAGGTGAAAGTACGCGAGGCCACGTCCAATGATCCTTGGGGGCCATCGGCTACTATAATGGCCGAGATTGCTGACCTCACCTACAATGTCGTAGCCTTCTCGGAGATAATGCAAATGATTTGGAAACGTCTAAATGATCATGGCAAGAATTGGCGGCATGTTTACAAGGCACTTATCCTGCTGGAGTATTTGATTAAAACCGGCTCGGAAAAAGTGGCGCAACAGTGCAAGGAGAACATTTTTGCCATACAAACACTTCGTGAATTTGTGTACTTTGAAGAGGGCAAAGACCAGGGTACCCATGTACGTGAAAAAGCCAAACAGTTGGTGAATTTGCTGAAGGAT…	151	VAGLRRNIKNLAHNYSDAQVKVREATSNDPWGPSATIMAEIADLTYNVVAFSEIMQMIWKRLNDHGKNWRHVYKALILLEYLIKTGSEKVAQQCKENIFAIQTLREFVYFEEGKDQGTHVREKAKQLVNLLKDDERLKNERVKALKAKERF
	507	UN001455	4926	GGCAGTAGGAGGTCAGGATCTGATGAGACAAATGAATTGTATTCTGAAAGAAAAATCCAGTATAATGGAATTGAGATCGATGTGCATGATAGTTCATCTATTCAAAAATTGCGAGAAGAGGTTCATAAACAGGCATTTCGGTCTTACTATGAGGCATGTCAGAAGCTTGTATCCTCAGAAGGATCAGGTACCTGTAAAACAGGTTTCCAGGCTGGTTTTAAGCCAAGTACCTCCAGAACTTCACTTCTATCTGTTTGTGCTACGGAGTTGGATGTTACCTTGACGAAAATGGAAGGTGGTGACACTGGAATGATTGAGTTTGTAAAGAAGCTTGACCCTGTATGTTTAGATAACAACGTACCATTCTCTCGGTTTATTGGAAGAAATATTGTTCTGCAT…	1642	GSRRSGSDETNELYSERKIQYNGIEIDVHDSSSIQKLREEVHKQAFRSYYEACQKLVSSEGSGTCKTGFQAGFKPSTSRTSLLSVCATELDVTLTKMEGGDTGMIEFVKKLDPVCLDNNVPFSRFIGRNIVLHTGSLAVCIRNYTFPILSATAGKCEGRIVLAQQATCFQPQIQQDIYIGRWRKVRVLRSASGTTPPLKTYSDLPIYFQKAEVSFGVGFEPALNDISYAFTVALRRANLSIRSSDSTNINFLVNQQPRKERSLPWWDEVRNYIHGNYVLFFAETRWNFLASTNPYEKLDKLQIVSGYMEIQHSDGRVYVYAQDFKIFVSSLNSCSLRLPSRASRAFLESPVFRLEVNMDWECESGNPLNHYLYALPNEGEPRKKVYDPFRSTSLSLRWN…
	508	UN001460	531	AAAATTATCATGTGTGCCACATGCGGAGAACATTTTCACACGAATTGCGTTGGTCTAATAAATACTCCAGAAACTCGTGCTGGATGGAACTGTTCAAGTTGCCGTAAATGTCAAATATGCAGAGAAGGGGACGGAACCGAGGGCCGTTTTATCAAATGTGAGCAATGCCAACGATTATATCATACTACGTGCTTACGGCCCATGATTTCATCTTTGCCCAAGTATGGATGGAAGTGCAATCGATGCCGAGTTTGTACTGACTGTGGTTCAAGAACTCCTGGTGGTGGAGCATCTTCTCGATGGCATTGCCAATACACGATTTGTGATTCCTGCTATCAGCAACGTAACAAAGGGTTCTCTTGTCCCATTTGTCATAAGGCGTATCGAGCCTCTGCCCAC…	177	KIIMCATCGEHFHTNCVGLINTPETRAGWNCSSCRKCQICREGDGTEGRFIKCEQCQRLYHTTCLRPMISSLPKYGWKCNRCRVCTDCGSRTPGGGASSRWHCQYTICDSCYQQRNKGFSCPICHKAYRASAHKEMVKCNLCHRFVHSTCDEDADLINYHKKKESNPDYDYICPHCK
	509	UN001464	3840	CCGATGATCCCCGGCCTCTCGACGGGAGCCTTCGTTCCGGCGGTTTTCGATGCGAGCGAGGCGAACGGCGGCGGAGTGAAGGCGAAGGACGGCGAGGATGAGGAGGACGATTGGGATAGCGACGACAGCGAGGACGATCTGCAAATCGTGCTGAATGAAACCCTACCGATTGGCGCGGAGCAGGAGGACGAGGATGGCGAGGATTTGGTGATTGTGGCGGACGGAGATCAGCATATTCCGGGGATCGAGGAGCAGGAGTGGGGGGAGGAGGCCACACAGGCCTCGGTGGATGGGGATAGGAAGGAGGGCGGCGAGGCCGCAAAAGTGGGCGGTGGCGGAGGGATCGCGATGGTGGGTCCTGGCGGGGCGAGGATCGGGTATAGCAATCACGGGTATCAT…	1280	PMIPGLSTGAFVPAVFDASEANGGGVKAKDGEDEEDDWDSDDSEDDLQIVLNETLPIGAEQEDEDGEDLVIVADGDQHIPGIEEQEWGEEATQASVDGDRKEGGEAAKVGGGGGIAMVGPGGARIGYSNHGYHPHHSQFKYVRPGATIVPGGAVAGGAAPGQVRPPVTMGSIPGRGRGDWRPIGMNKSLPTMQKNFHSGFGLPIWANNSSGRGFGTGMEFTLPSHKTVFDIDIDSFEEKPWRYPGVDTSDYFNFGLDEDNWKDYCKQLGQLRLEATMQSKIRVYESGRSEQDYDPDLPPELAAAAGLHDVSVENSHLGKTDSGLMDLAGQGRGATRTRPQLPTGRAIQVEGGYGERLPSIDTRPPRVRDSDAIIEIVLQDSVDDDSIVANGEQPEDETQ…
	510	UN001465	3930	AGAGATTATGTCTTTACAGCGCGGAGCAAGGATATAGGAGCAAGTTGGCCATTCTCCCAACCTCTCTTACAACTTTGCTTGAAGCATGGTGTCAAAGATCCATTGCCTCCTTTCGAACCTCCCAATTTGGTGAGAGGCCAGTGTCACCAAAAGGGTGTAGTAACAACAGAACATCTGAATGCCTGCGAAGGCAGTGAGAAGACTCTAGCCAAAACTGATTCACTTGATAAGGAAGATGCAGTTTTGTTGGATTTGCAAGACAGTCATACTAAACACAAACATTCTCAGTCATTGGATCAATCAGTTCTAGATCAAGGAGACAATAAATTGTGTAGATTATCAAAGTCTTTGGGTTCAAATGAAGCTGGTGGGAAAGGAGTTATCGCATCATCATTGACC…	1310	RDYVFTARSKDIGASWPFSQPLLQLCLKHGVKDPLPPFEPPNLVRGQCHQKGVVTTEHLNACEGSEKTLAKTDSLDKEDAVLLDLQDSHTKHKHSQSLDQSVLDQGDNKLCRLSKSLGSNEAGGKGVIASSLTSHVKNNSNSTLANRLTSSLQETNSLSEASIEFEALEPPKAPNKTGSFCGPSDKKCRLIVKLGGVSESGRTEDIVSNSSALSESMASKVCPVCKTFTSTSNTTLNAHIDQCLAVESTCERVLTDLAKHRVKPRKKRLMVDIYVTAPNCTLEDLDRRNGTNWANDSKAPMPNGEIGVESKRQRMSQVDVVDDVDDDRAVYVDSKGTKLRILSKFNDTVAPTLGDDFTQRNHSNDTKKGKIFFIGKKKHLVPKCSKHMKVKPQSKSLCA…
	511	UN001467	4026	CAACCAAATTCTAGTGAATGGTACCCAGCAATGAAGTTTAAGTCATCAAAAGATTTGTCTGGCAAGAAAATTACAGTGGAAGTGAATGAAAATTTGCCGAAGAAGTTTGAAAGTAAAAATCCTCATAAAATATTGCCTGAAGATTACTGGGATTTCATCCCGAAAGATCCAAGGGAAGAAAAATGGCATGTCACACCGAGGAAAATAACACTACGACCATACCAGGTCTTTTCGTTGTTGAAAGAGCTTGATCCTAAGTTAATCGAGAAATTTGTTTCAAGGAGGAATTCATTATTTCTTTCTTCCATTCCTGTTACTCCAAATTGTAACCGTGTGATGGAAACAATGCATGTATTTGCTGATGGTCCCAGATTGACTTTTGATGAACGCACAAGGGCT…	1342	QPNSSEWYPAMKFKSSKDLSGKKITVEVNENLPKKFESKNPHKILPEDYWDFIPKDPREEKWHVTPRKITLRPYQVFSLLKELDPKLIEKFVSRRNSLFLSSIPVTPNCNRVMETMHVFADGPRLTFDERTRAYRRLVDFGKQVKEYGPFTPLDADIPYRTSNRVLDCLNVSKLSTEGSLSTASVSSKSGLKWIKEVLLGKRTDYAFRMTVVGDPKIGLGEIGIPLDISENLQISEYVNSRNLDTLNTWCNLRLLQDRQYYGKSKGHLFSMRHTDKLQIGDTLYRPLVDGDLVLINRPPSVHQHSLIAFTVKTLPVKSVISLNPLCCAPLLGDFDGDCLHGYVPQSINSRVELQELVSLNHQLLNGQNGRNLLPLSQDSLTAAHLMTNSDVFLNRFQMQ…
	512	UN001469	474	AATACGACATGTCGACCGGATCAATTCCAGTGCGGCGATCACACCTGCATAGCAGGACATTTAACGTGCAATGGCGAGGCCGATTGTGCGGATCGTAGCGATGAGCAAAATTGTGGTATTTCTAAAATCACCAAATGCAATGCGACCACACACTTTGATTGCGGCGGTGGTCAGTGTATCCCGCTTTCCAAAGTTTGCGATCGCAAAAAGGACTGTCCAGATGGCGAAGACGAGCCGGCGGGCAAGTGTGCGGTGAACGAGTGTGCAGTGAATAATGGCGGTTGCATGCACAAGTGCGTTGACCAGCCGATTGGCTATCGCTGTGAATGCAACTCTGGCTACAAACTGACCGATAACAAAACCTGCGTAGACATAAACGAATGCGAAGATCCGGGTGCT…	158	NTTCRPDQFQCGDHTCIAGHLTCNGEADCADRSDEQNCGISKITKCNATTHFDCGGGQCIPLSKVCDRKKDCPDGEDEPAGKCAVNECAVNNGGCMHKCVDQPIGYRCECNSGYKLTDNKTCVDINECEDPGACSQICINEVGGFKCECEAGYMRDPR
	513	UN001475	480	GAGGACGACCCACTTGCGACTCGTACTTTATTTGCCGGTAACTTAGAAGTGAACATTTCGGACGAAGAATTGCGACGCATTTTCGGCAAATATGGGATTGTGGATGATATTGATATAAAACGGCCGCCTCCAGGAACTGGCAATGCATTTGCTTTCGTACGCTATCAGAATTTAGACATGGCCCATCGTGCAAAAATAGAGCTGTCCGGTCAATACATTGGAAAGTTTCAGTGTAAAATTGGTTACGGTAAAGTGACGCCTGCTACGCGTATATGGATAGGCGGTCTAGGAGCTTGGACCTCTGTTACACAATTGGAACGGGAATTCGACCGTTTCGGTGCCATAAAGAAAATAGAATATCAAAAAGGAGATACATGCGCATATATTCAATATGAGACT…	160	EDDPLATRTLFAGNLEVNISDEELRRIFGKYGIVDDIDIKRPPPGTGNAFAFVRYQNLDMAHRAKIELSGQYIGKFQCKIGYGKVTPATRIWIGGLGAWTSVTQLEREFDRFGAIKKIEYQKGDTCAYIQYETIEAASAAVKEMRGFPLGGPERRLRTDF
	514	UN001476	1935	GAGATTGATGCTCATCTTGGTGGCGTAAATGATCTTGCTTTCTCACACCCCAATAAGCAACTATGTGTTATAACTTGTGGTGATGACAAGACCATCAAGGTGTGGGATGCGGCTACTGGTGCCAAGCAGTACACTTTTGAAGGCCACGAGGCTGCTGTTTTTTCTGTTTGCCCTCATCACAAGGAGAATATTCAGTTCATCTTTTCAACAGCATTAGATGGAAAGATAAAGGCGTGGTTATATGACAACCTAGGATCTAGAGTTGATTATGATGCACCTGGACACTGGTGCACTACAATGGCTTACAGTGCTGATGGCTCAAGGCTTTTTTCATGTGGGACCAGTAAAGATGGAGAATCATACATTGTTGAATGGAACGAAAGTGAAGGGGCTGTGAAA…	645	EIDAHLGGVNDLAFSHPNKQLCVITCGDDKTIKVWDAATGAKQYTFEGHEAAVFSVCPHHKENIQFIFSTALDGKIKAWLYDNLGSRVDYDAPGHWCTTMAYSADGSRLFSCGTSKDGESYIVEWNESEGAVKRTYQGFQKCSLGVVQFDTIRNRFLAAGDDFAIKFWDMDNVNLLTTVDADGGLPASPRIRFNKEGMLLAVSANEIGIKILANADGLRLLRTFENRSFISEPVTKPQVNSVTTIADRVATAVAMAEVNGDTGSVMDVKSKVTDESLDKSKIWKLTEIKEQAQCRSLRLPDNLRTTKISRLIYTNSGFAILALASNAIHLLWKWQRNDRNTNVKATASVVPQLWQPPSGILMTNDITGTNSEEAVPCFALSKNDSYVLSASGGKISLFN…
	515	UN001483	252	TTTGTGTGTCGCGTTTGTCTGAAAGCGTTCTCGTTACAACGCCTTCTGAATCGGCACATGAAGTGTCACTCGGAGATTAAGCGCTACTTGTGCACATTTTGTGGCAAAGGATTCAACGACACCTTCGATTTGAAACGCCACACGCGCACACACACCGGCGTGCGACCGTACAAGTGCAATTTGTGCGAAAAGAGCTTCACGCAGCGCTGTTCACTAGAGTCGCACTGCCTCAAAGTGCACAGTGTGCAGCAT	84	FVCRVCLKAFSLQRLLNRHMKCHSEIKRYLCTFCGKGFNDTFDLKRHTRTHTGVRPYKCNLCEKSFTQRCSLESHCLKVHSVQH
	516	UN001485	843	TCATCTAAACTCCGGTCATTGCCCGTTAACAAGAAGCTACAGATGTTGAACATCAACGGTGTCCTCTATAGGTCAACTCGCAACAAATTACAAAGAAAAGATGCAAGCGTACCTCCAAATCAAATAGGGTCAATAAAAATGTCCGCGTTAAACACAAAGTCAAATTCTATTAAAGACGCAACCCAGAAATCCAGCAAAAGTTCTTATGGCCGTGTACTATTTGTAAGCGGAACGAAATTCATATTAGATAAGAATGGCTTCAAACTAACACGTATTCCGCCTACGTGCAAGGAGAATTTGGCGAACATCCAAAAATCGGGTGAAACTCATCAAAGGCAGCGACAACGCATAGACATTGGTGGATTGACCTACATCGCTTCCACAACCCAAAATGTGTTT…	281	SSKLRSLPVNKKLQMLNINGVLYRSTRNKLQRKDASVPPNQIGSIKMSALNTKSNSIKDATQKSSKSSYGRVLFVSGTKFILDKNGFKLTRIPPTCKENLANIQKSGETHQRQRQRIDIGGLTYIASTTQNVFVRTRNHLALAHLNTAKSRSLHLLTRRLVKSNIPCAIFQRLGKCIAHERGKCNRVHDKRQVTICPRFLRGECNNSECLLSHNVSLAKMPVCKFFLQGVCVRTDCPYLHKKLSVNADVCPDFLRGYCNLAQQCNKRHEFVCPEYERSGNC
	517	UN001486	990	GCTCGAGATTTTGATCCTCTATTGAAGGATCTAACTGAGAAGAAGCTAAGCTTTCGGCGCAACGTGGCTTCTCTGGCTACCGAGCTGAAAGATGCTCGCAGTCGGCTGGCTTCAAAAGAGGAATCTTTTGCTCGAGAAGCCCTAACAAGACAGGTGGCTGAGACTAAGGCCAAGGGCATGGAGGAGGAGATTTGCAGCTTGAGGAAGAGCTTGGAAGAGAGGACCGGGCAGTTGCAGGCATCGACGTCTAACGTTGAACAGTACCTCAAGGAGTTGGATAATGTAAGGTCACAGCTCTCGGCTACACGGGCAACCGCAGATGCGAGTGCTGCATCAGCCCAATCAGCACAACTTCAGTGTTTGGCCTTAGTAAAAGAATTAGATGAGAAGAACAGTTCA…	330	ARDFDPLLKDLTEKKLSFRRNVASLATELKDARSRLASKEESFAREALTRQVAETKAKGMEEEICSLRKSLEERTGQLQASTSNVEQYLKELDNVRSQLSATRATADASAASAQSAQLQCLALVKELDEKNSSLKEHEDRVNRLGEQLDNLQKNLQSREVSQKQLKDEVLRIEQEIMQAVAKSGAKKDCELRKILDEVSPKNFEKINKHLSAKDEEIARLRDEIKVMSAHWKLKTKELESQLEKHRRADQELKKRVLKLEFCLQEARSQTRKLQRMGERRDKALKELRDQLAMKQQSGGGSFDKQNFWESSSFKIIVSMSMLVLVVFAKR
	518	UN001491	474	AAACCCAAACACGCGATCACGACCGTTAATTCCGTTAAAGTTAACGGCATGAGAGTAGCCCTAGATGTTCCTCAACTGCGCGTCGATTTCAATGTCTCCCTCGACATCGATCTCACCGTTAAAAACCCTAATCGCGTGAGTTTCCGGTACGGGAACAGCTCGGCCTTGCTGTATTACAGGGGAGTTGTCGTCGGAGAGGCGGAGATCCCGGCGGGGCAGATATCGTCGGGCGAGACGAAGGGGATGAATGTGACGCTGGTGTTGATGGCGGATCAGCTGCTTTCGGACTCTGATTTCTACTCCGACGTCGTCTCCGGTACGTTGCCCTTGAAAACCAGTACTAGGATTTCTGGAAGAGTTATTGTTTTGAAGTTGTTTAAGCATCATGTGGTTTCATAT…	158	KPKHAITTVNSVKVNGMRVALDVPQLRVDFNVSLDIDLTVKNPNRVSFRYGNSSALLYYRGVVVGEAEIPAGQISSGETKGMNVTLVLMADQLLSDSDFYSDVVSGTLPLKTSTRISGRVIVLKLFKHHVVSYTYCDVLVNVRNSSVGKSNCEYRTKL
	519	UN001493	855	TTAGTGCACTACTATCATGGATTTCGGCTACTCTTTATTGATATAAATATTTCACGTAAGCTTATGTGGCGTGTACTTAATGGTAAGACACTTACCCGTCGTGAGAATAAACTACTTTTACGCACCACCTCCGATCTGTTCCGACTCATACCGTTTTCGGTTTTCATAATCGTTCCATTTATGGAACTACTATTGCCGTTCTTTATTCGTTTCTTCCCTGGTATGTTGCCTTCTACGTTCCAAACGGCCAAGGAGCACGAGGATAAGCTGAAGCAATCGCTGCAAGTGCGTCTTGAAATGGCGAAATTTTTGCAACAAACACTCGACGAAATGGCTGTACAGCATAAGAAGGAACACAAGAGTGAAGAGGCTAAGCAGTTCGCTGAGTTCTTCGAGAAG…	285	LVHYYHGFRLLFIDINISRKLMWRVLNGKTLTRRENKLLLRTTSDLFRLIPFSVFIIVPFMELLLPFFIRFFPGMLPSTFQTAKEHEDKLKQSLQVRLEMAKFLQQTLDEMAVQHKKEHKSEEAKQFAEFFEKIKDTKEHVPIEEIIKFAKRFEDEITLDSLSREQLAALCRVLELNTMGTSNLLRFQLRLKLRSLAADDRAIAREGVEALDLFELQQACKARGMRAYGLTSDKLRSQLQEWIDLSLNEKVPPTLLLLSRALLISDETATTHKLVETMRVLPEAV
[truncated: 101,348 more rows]

## Sheet: TableS3
	Table S3: Differentially expressed UniGenes responsive to the pin and/or ovi treatments. Arabidopsis homologs of avocado UniGenes which were identified based on the unidirectional best-BLAST-hit similarity method were also represented and included in this table.
[truncated: 208 more rows]

[truncated: 6 more sheets: TableS4, Table S5, TableS6, TableS7, TableS8, TableS9]
